# Supplementary material
Source: publisher figshare collection journal article supplement (https://wiley.figshare.com/articles/dataset/_/3516086)

*Ecological Archives* A021-050-A1

**Jaclyn A. Hatala, Michael C. Dietze, Robert L. Crabtree, Katherine Kendall, Diana Six, and Paul R. Moorcroft. 2011. An ecosystem-scale model for the spread of a host-specific forest pathogen in the Greater Yellowstone Ecosystem. *Ecological Applications* 21:1138–1153.**

Appendix A. White pine blister rust model output for all 121 sites.

**Supplement 1.** This file contains the median model output with 95% confidence bounds for all four models described within the text of the paper, for each of the 121 field sites within the Greater Yellowstone Ecosystem. The legend for these plots matches that of Figures 5 and 6 within the paper, and is also described below. Each page of this file shows the model output for a different field site within the GYE.

Median model output with 95% confidence bounds for:

-  Model 1: Static local infection rate, no global infection rate
-  Model 2: Dynamic local infection rate, no global infection rate
-  Model 3: Dynamic local infection rate, static global infection rate
-  Model 4: Dynamic local infection rate, dynamic global infection rate
-  Field data

Uninfected

Site 1

Slight Infection

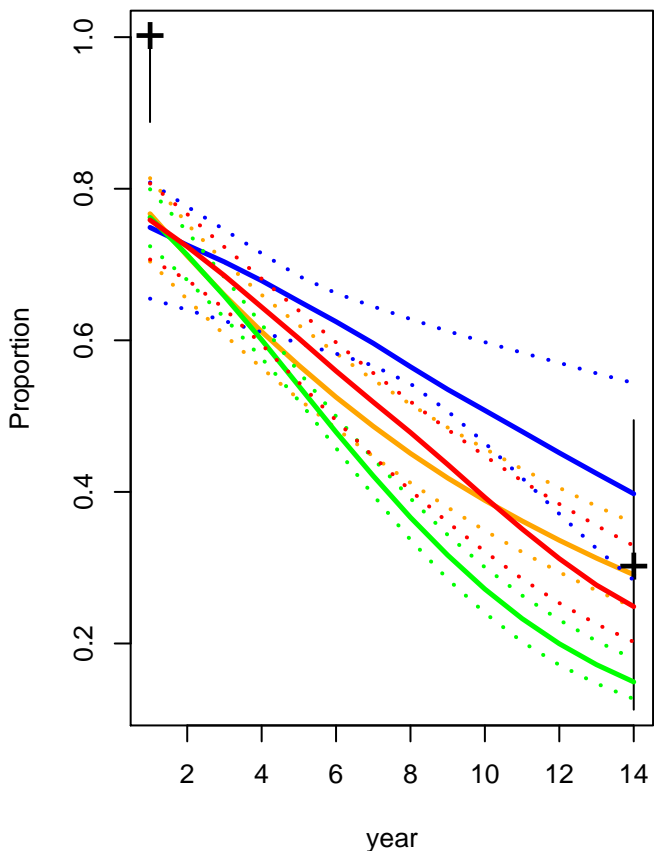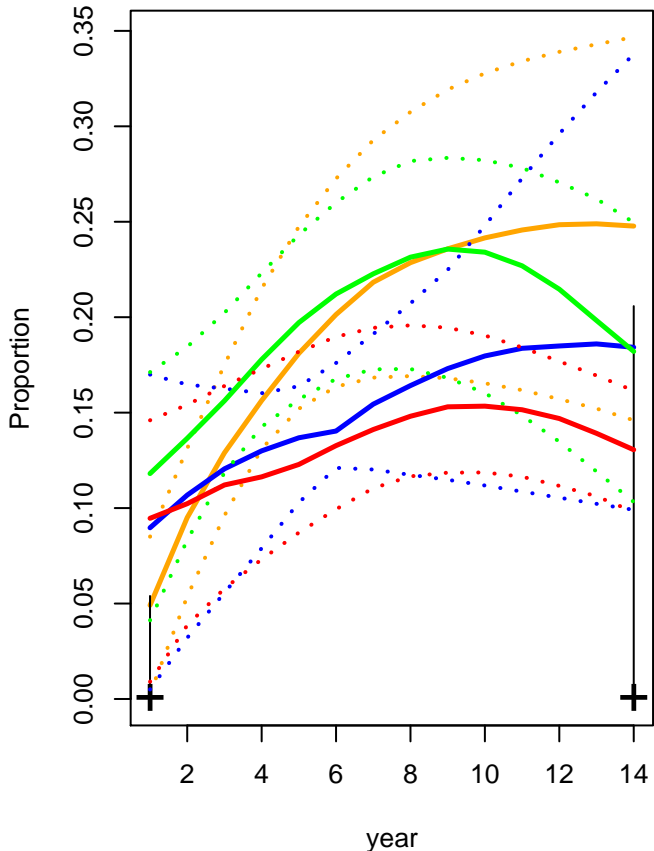

Moderate Infection

Dead

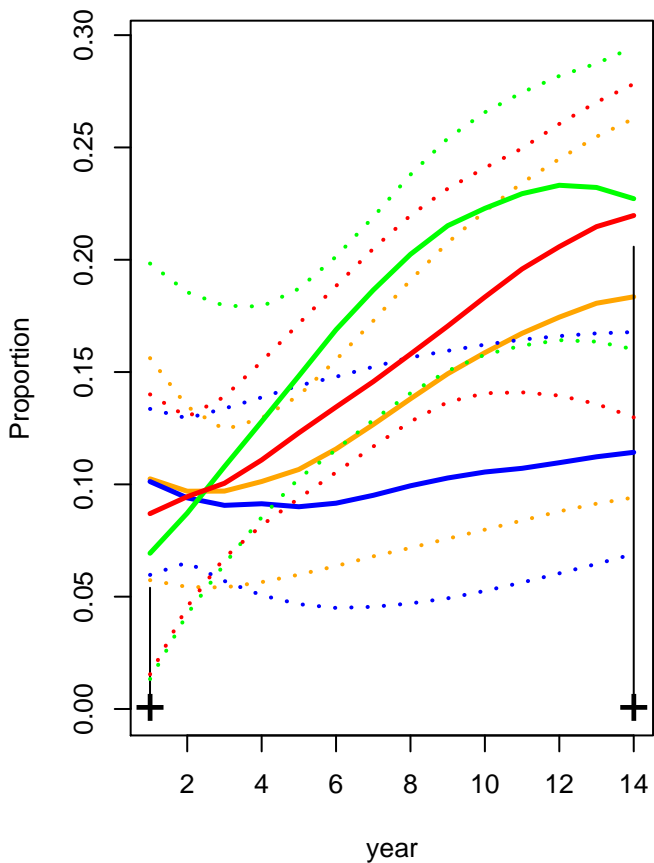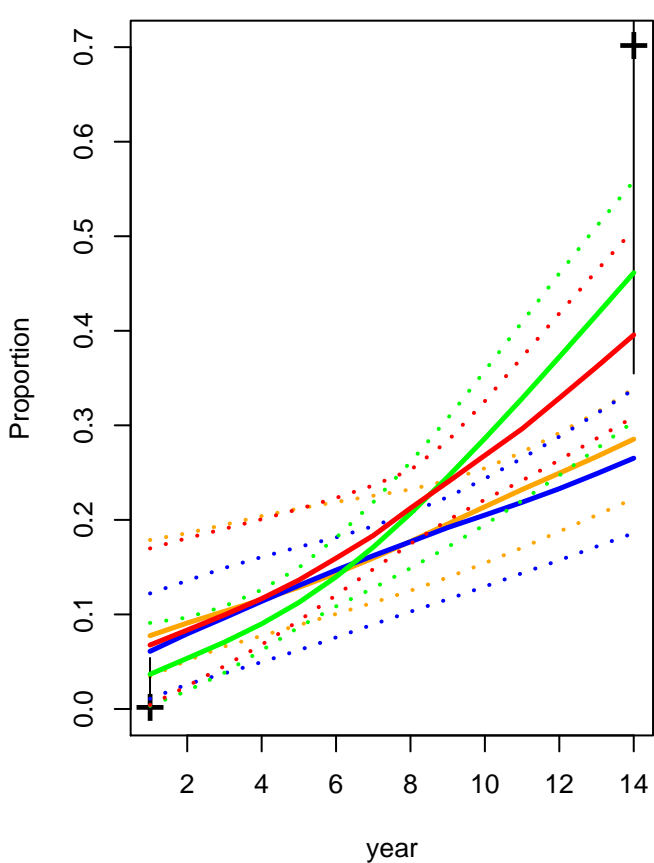

Uninfected

Site 2

Slight Infection

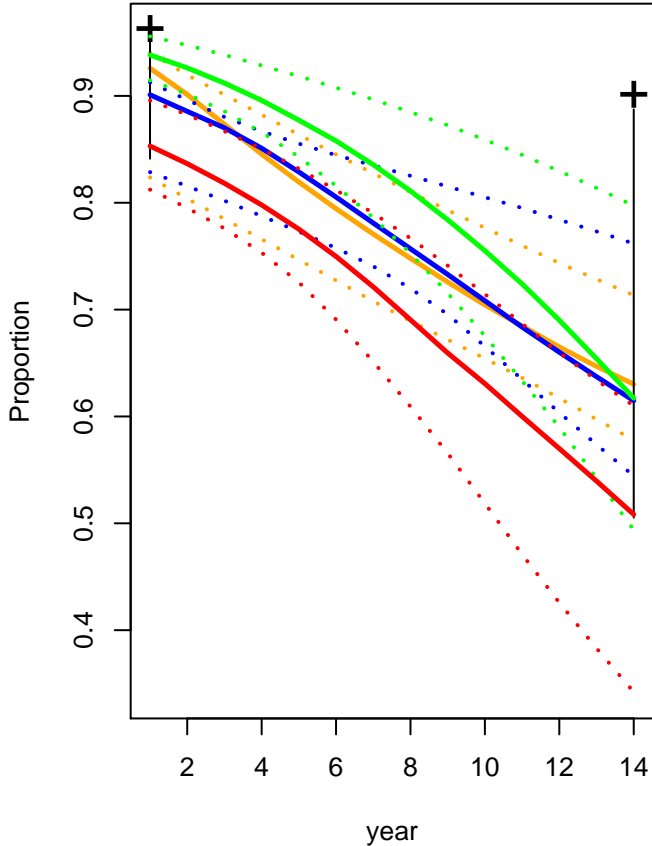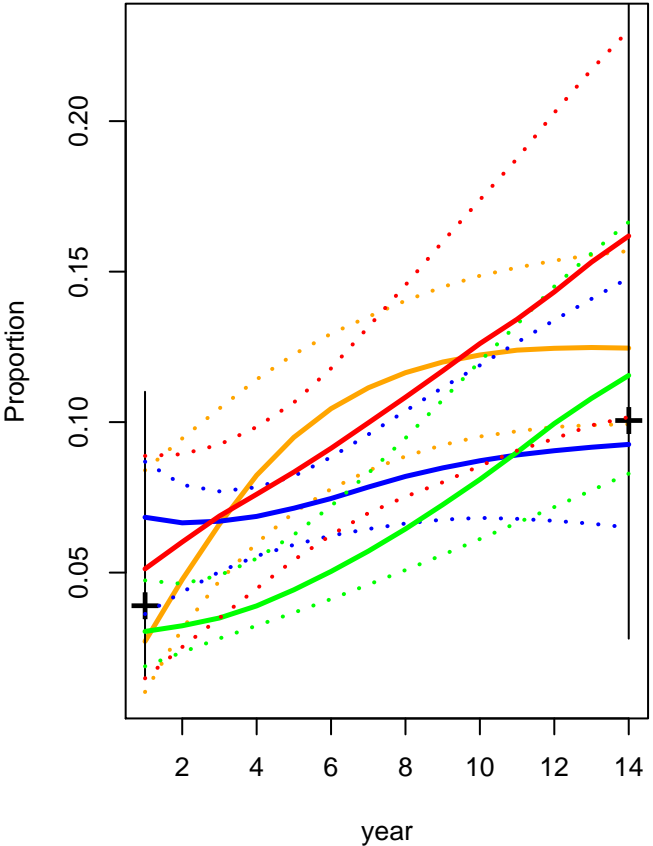

Moderate Infection

Dead

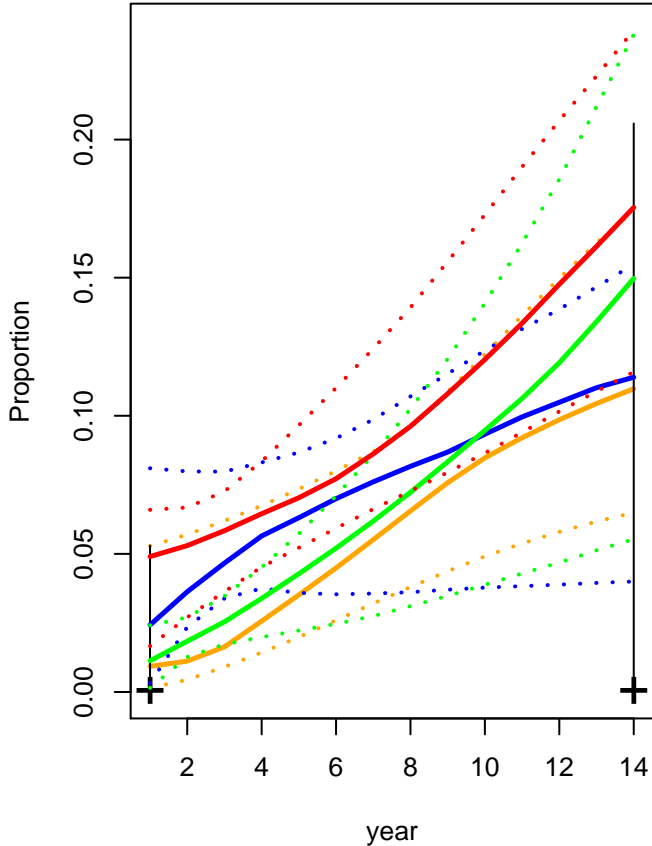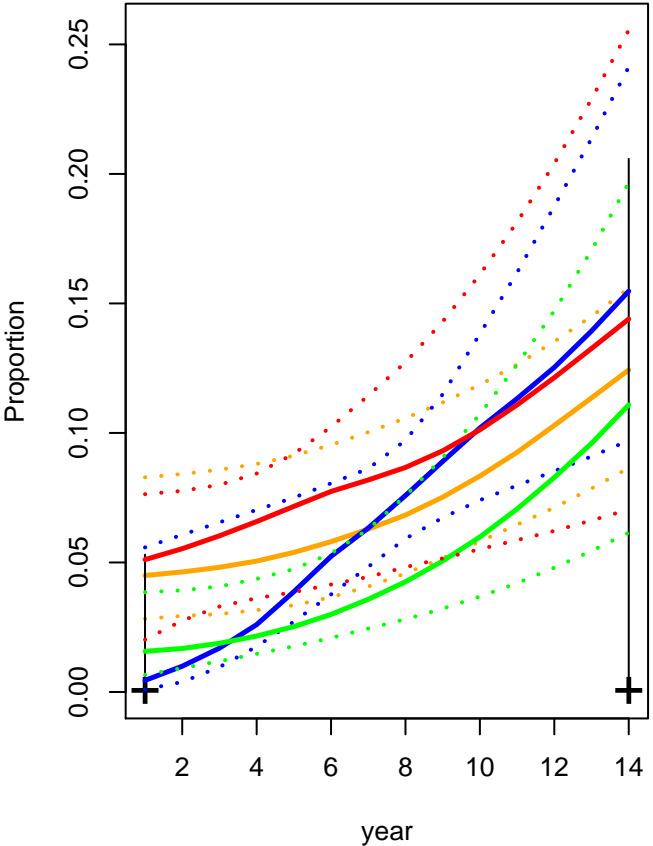

Uninfected

Site 3

Slight Infection

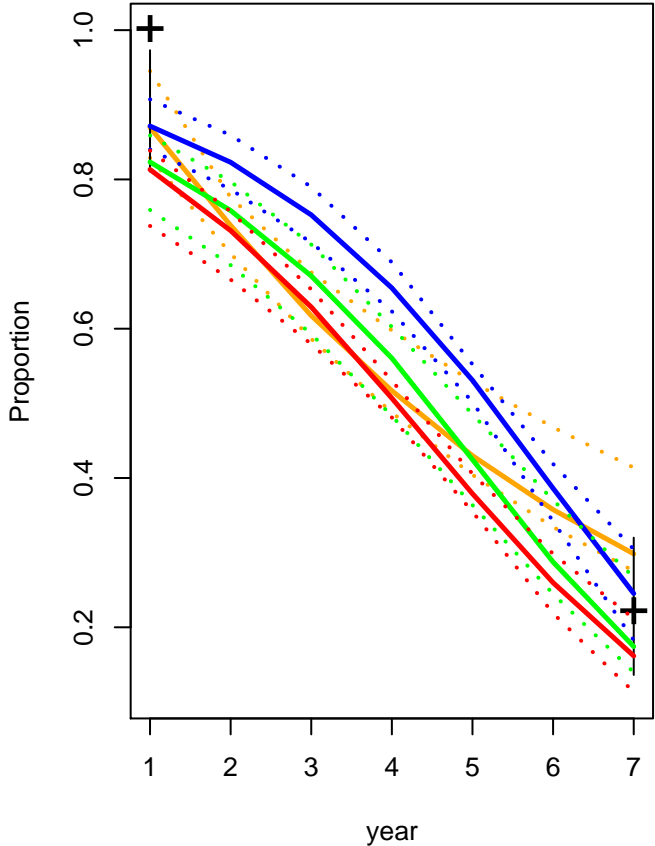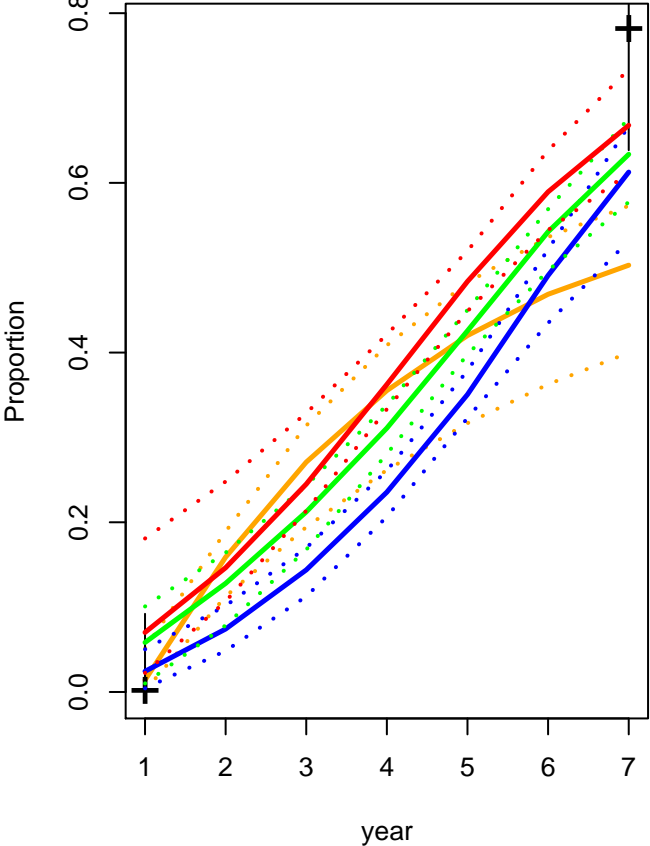

Moderate Infection

Dead

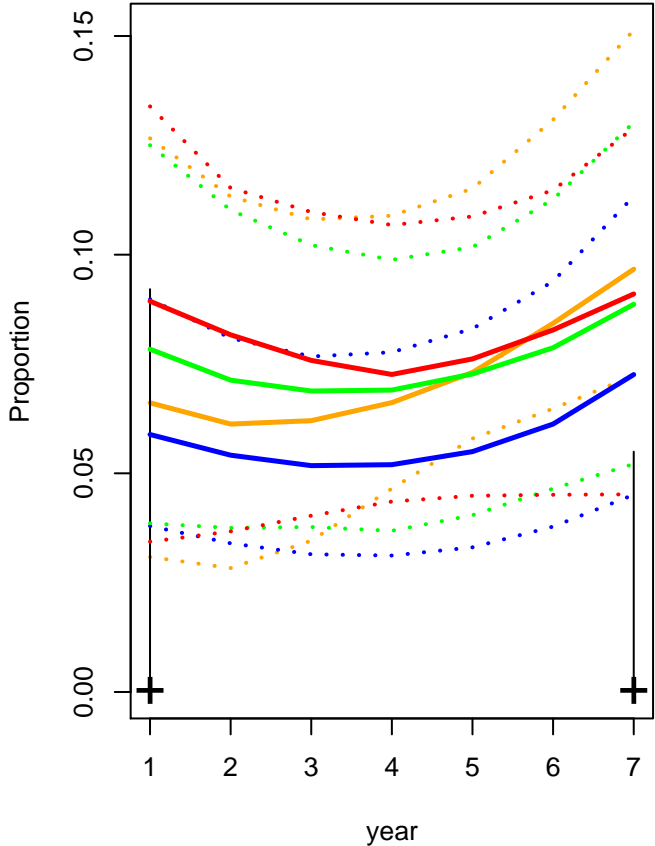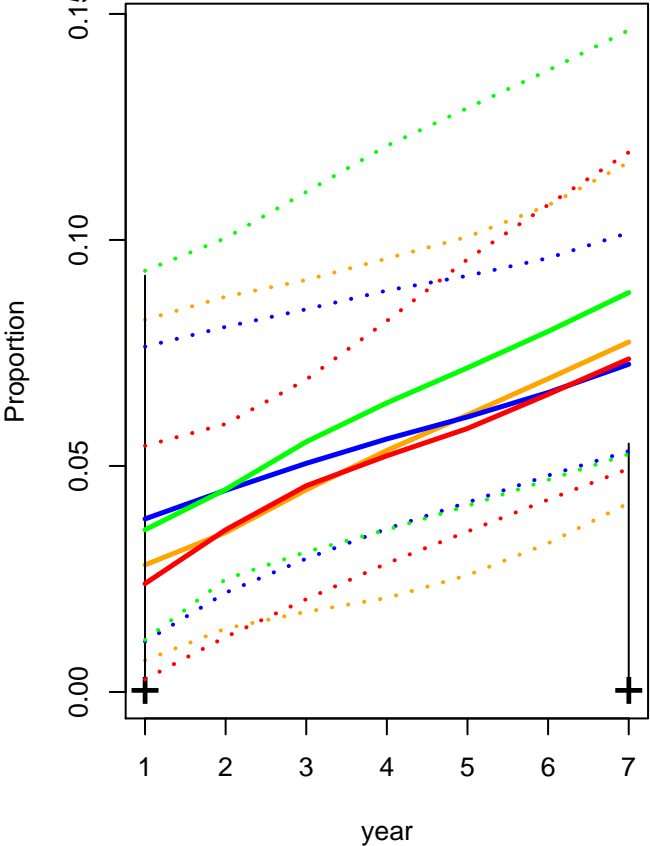

Uninfected

Site 4

Slight Infection

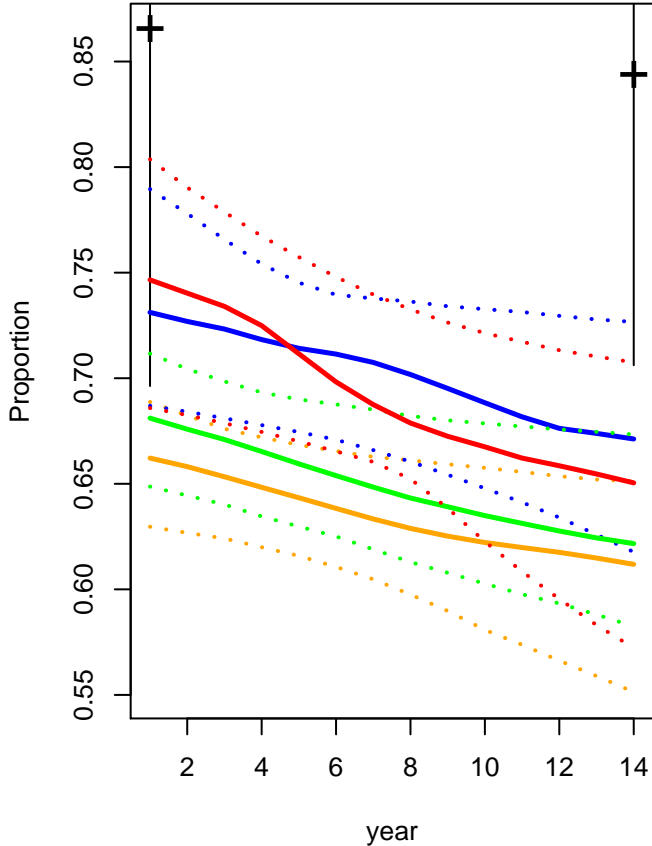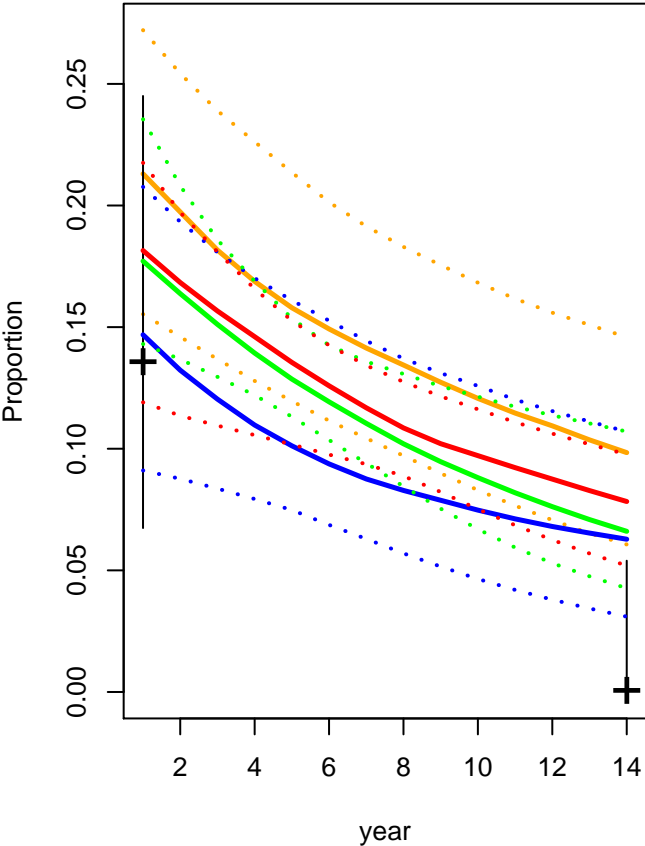

Moderate Infection

Dead

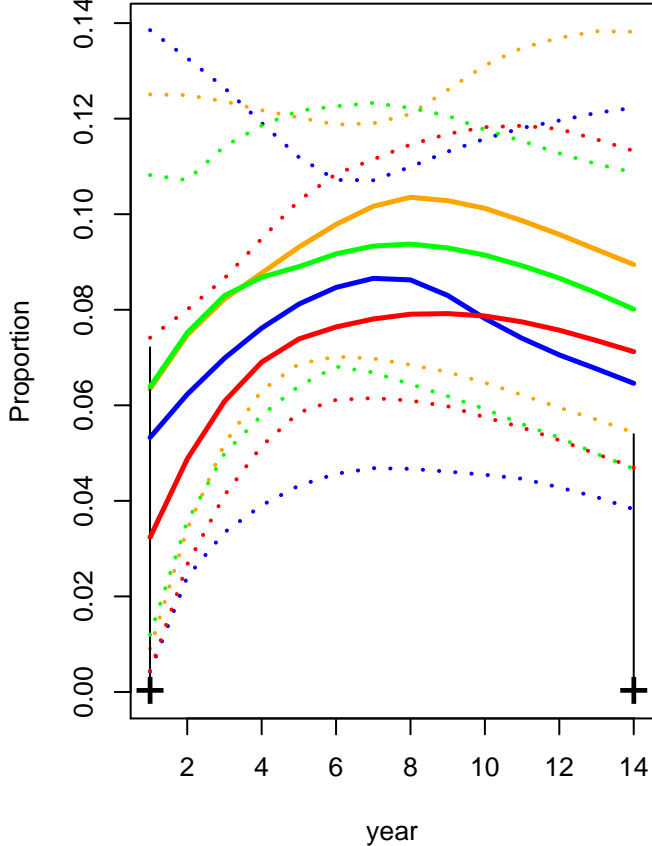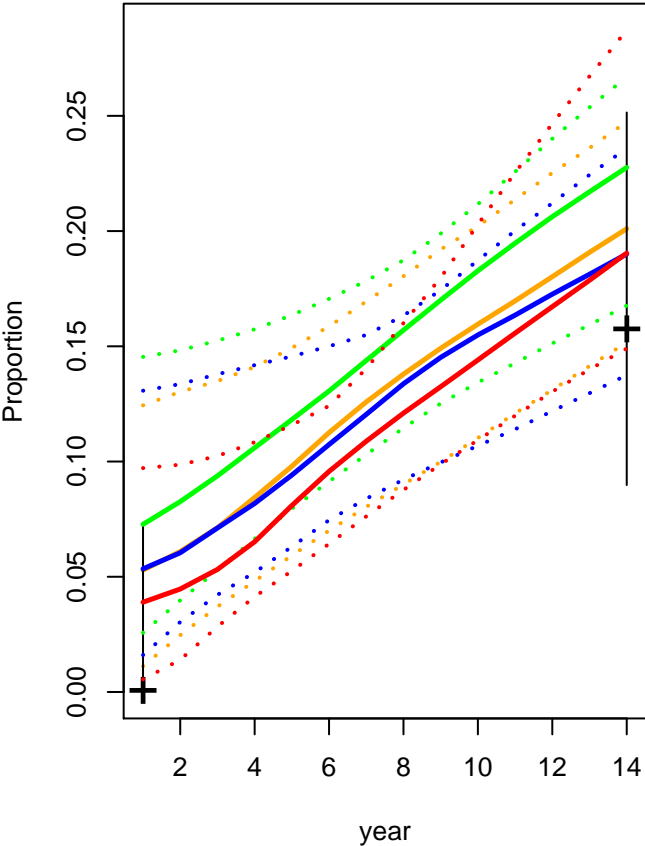

Uninfected

Site 5

Slight Infection

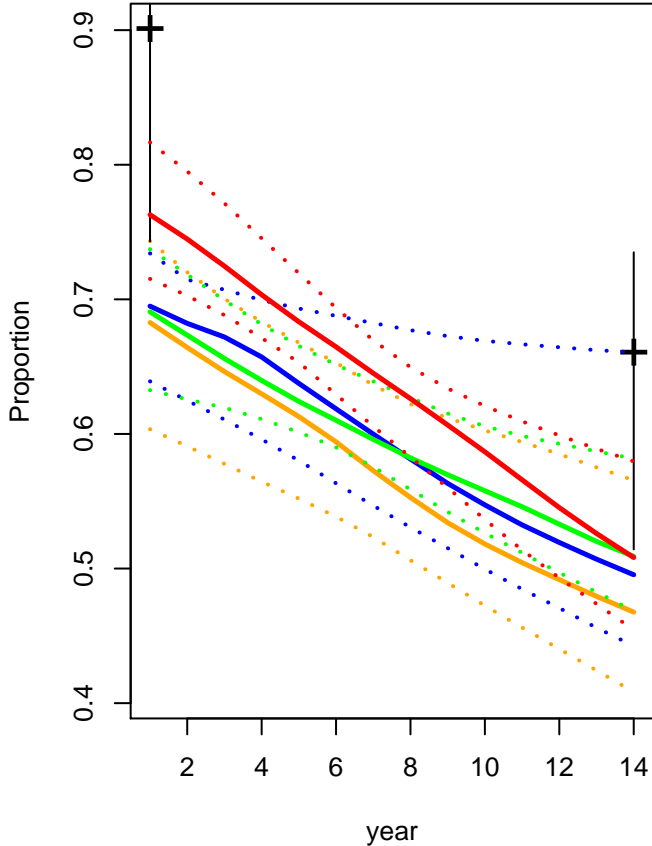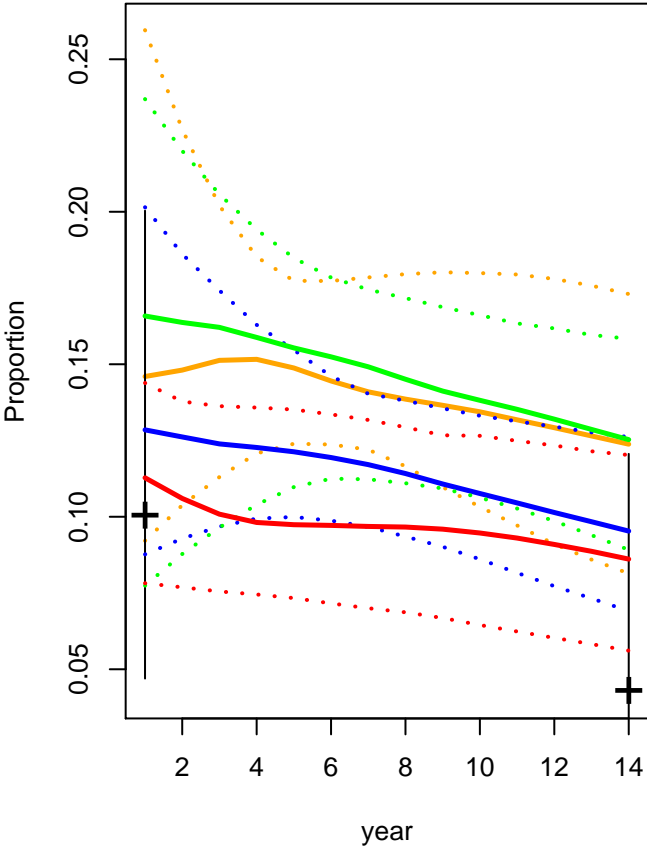

Moderate Infection

Dead

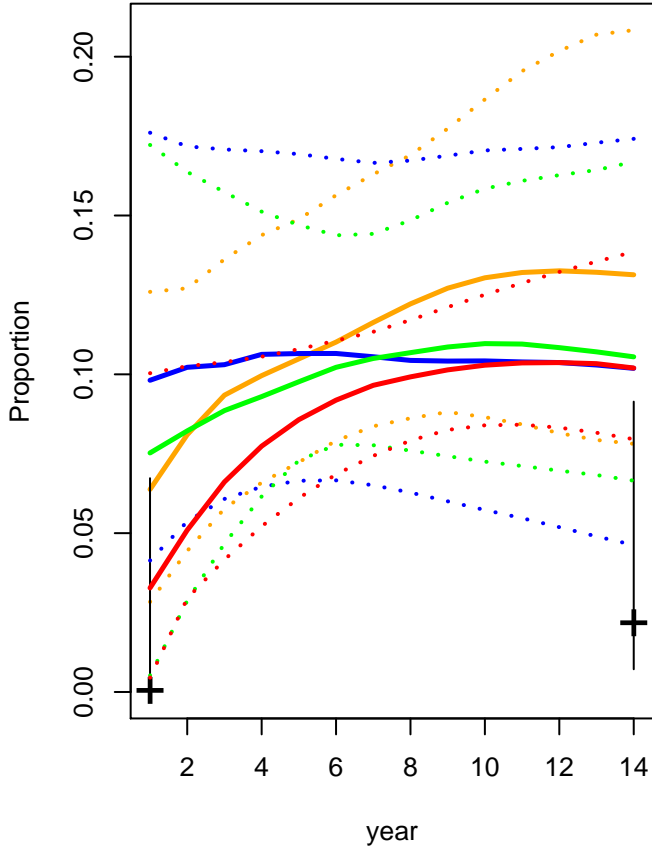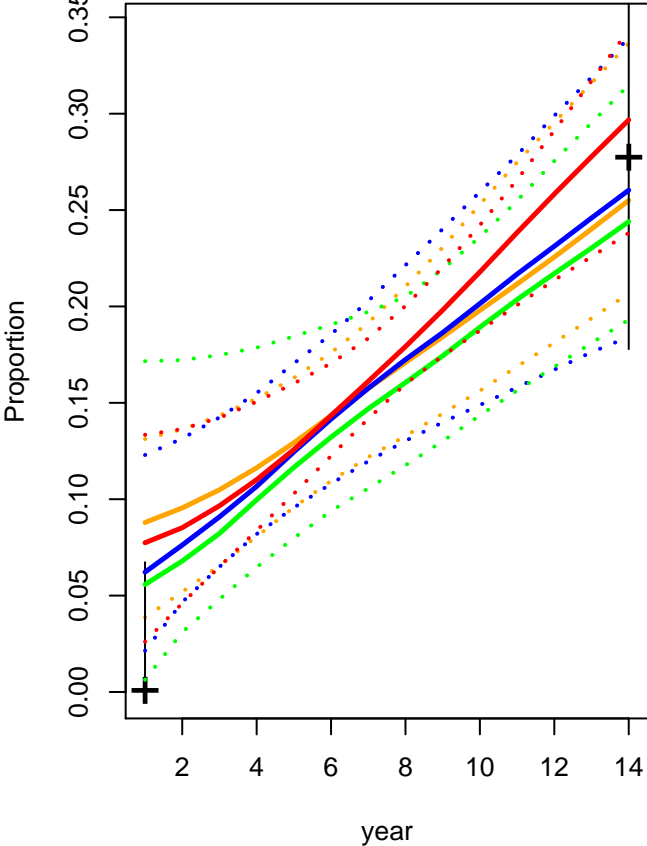

Uninfected

Site 6

Slight Infection

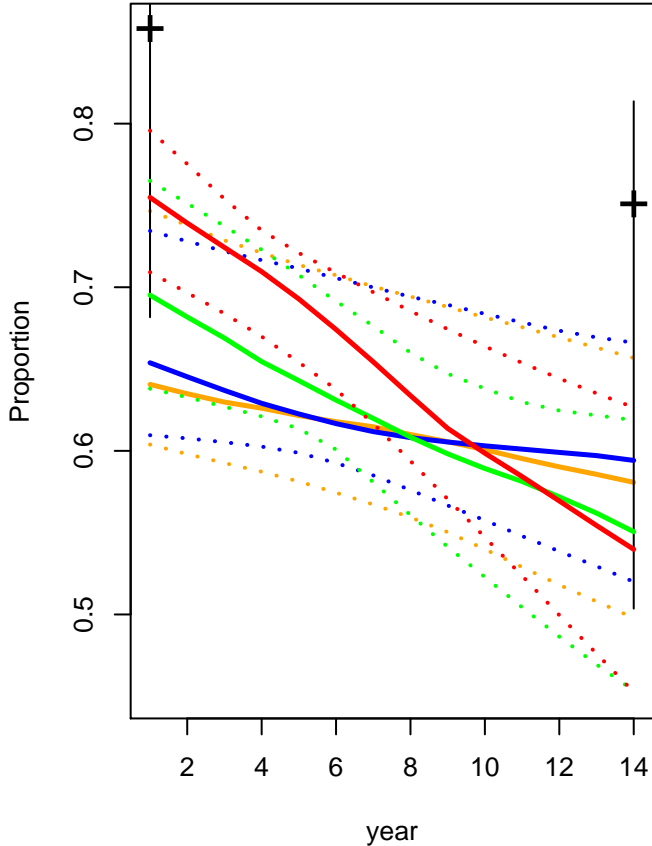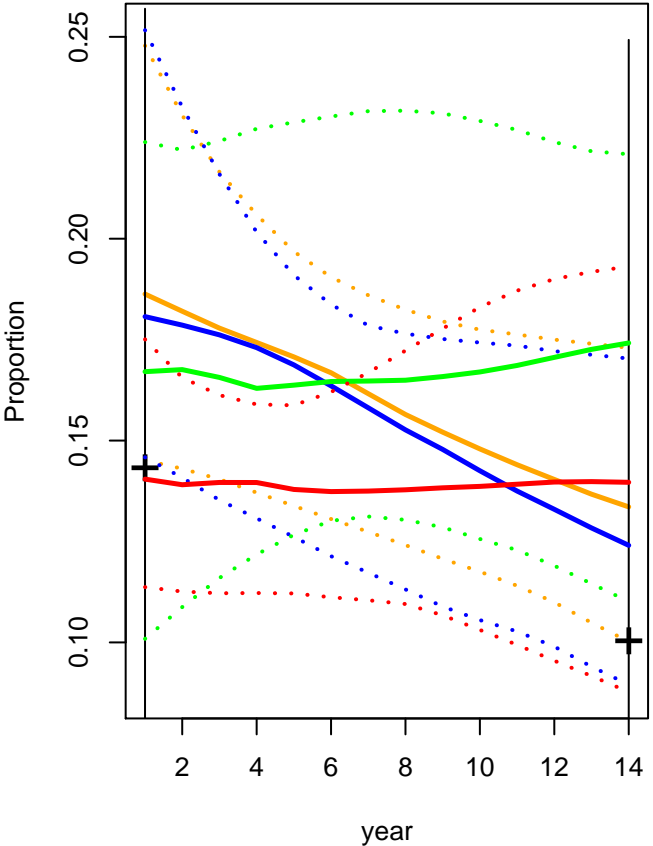

Moderate Infection

Dead

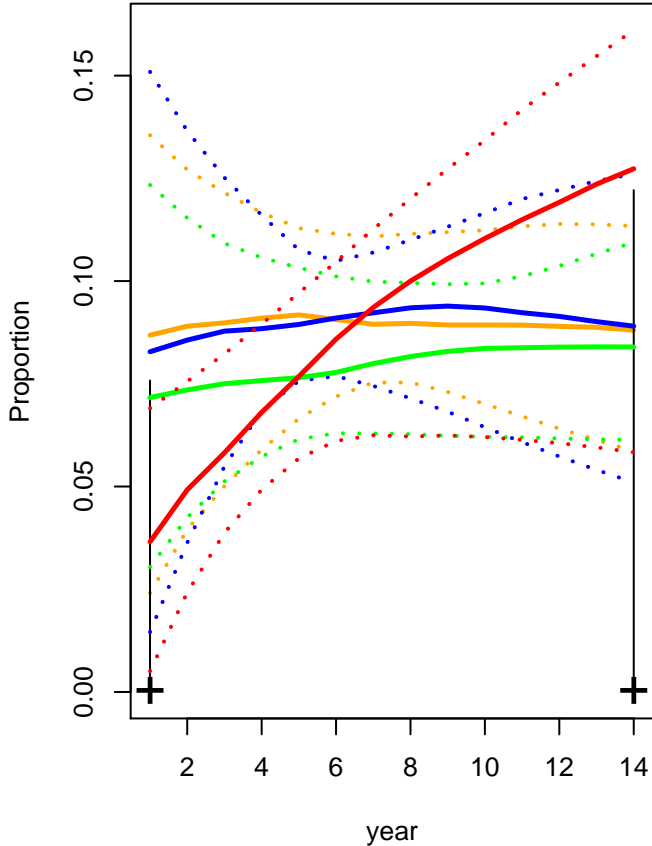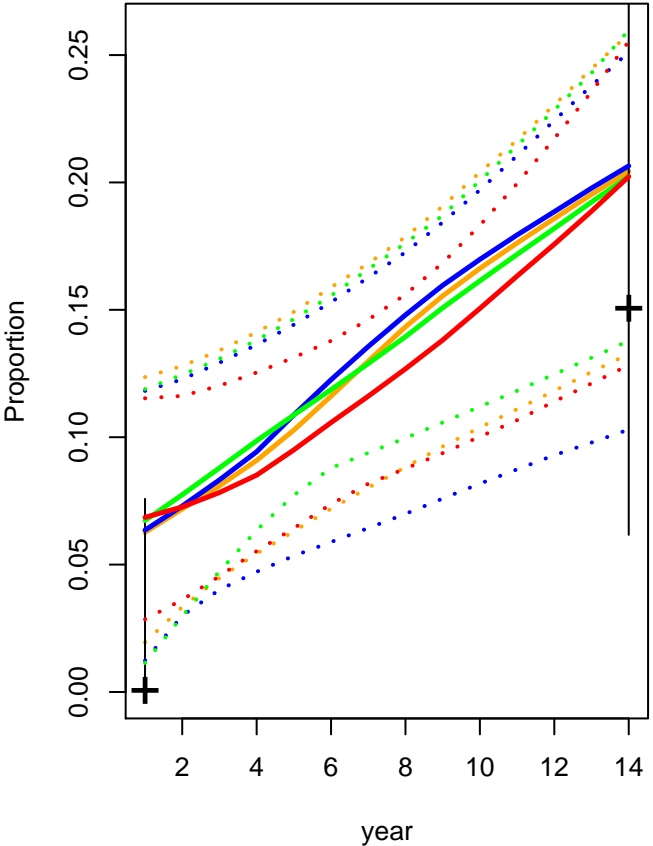



Uninfected

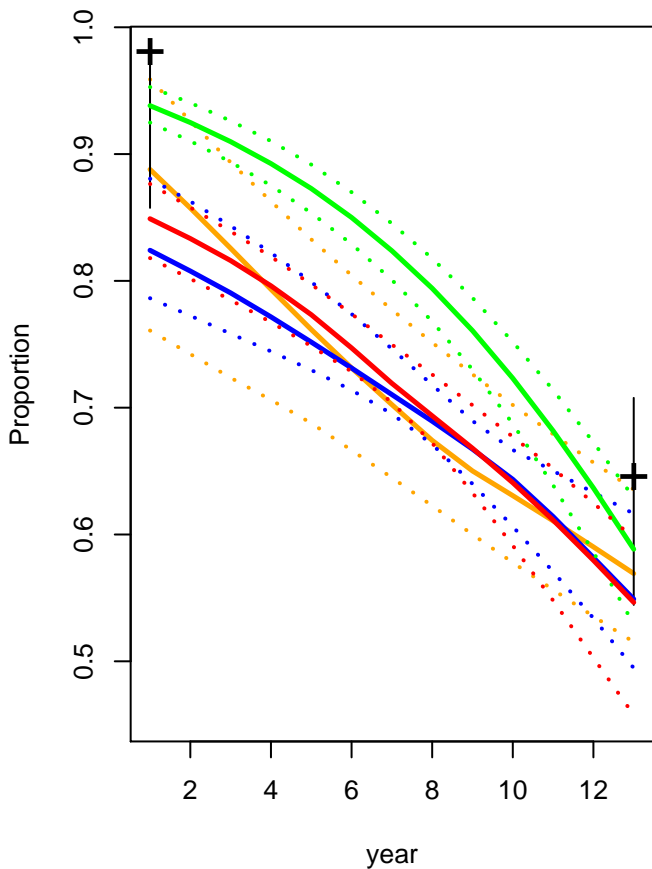

Site 7

Slight Infection

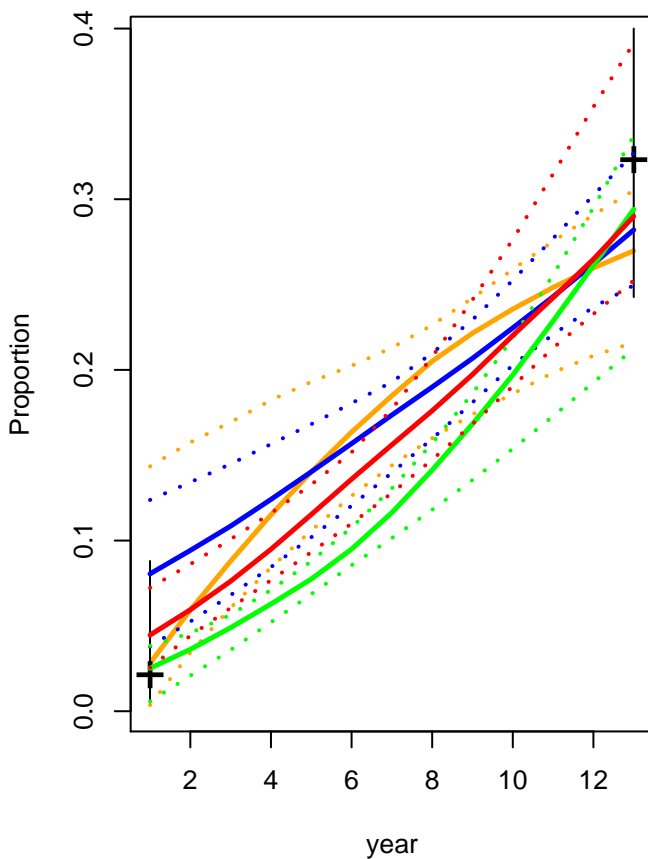

Moderate Infection

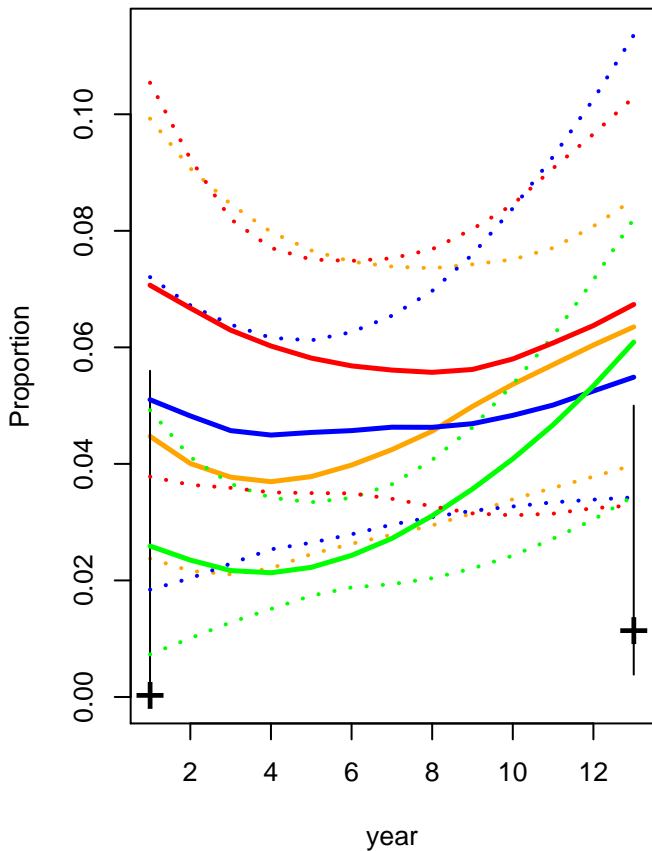

Dead

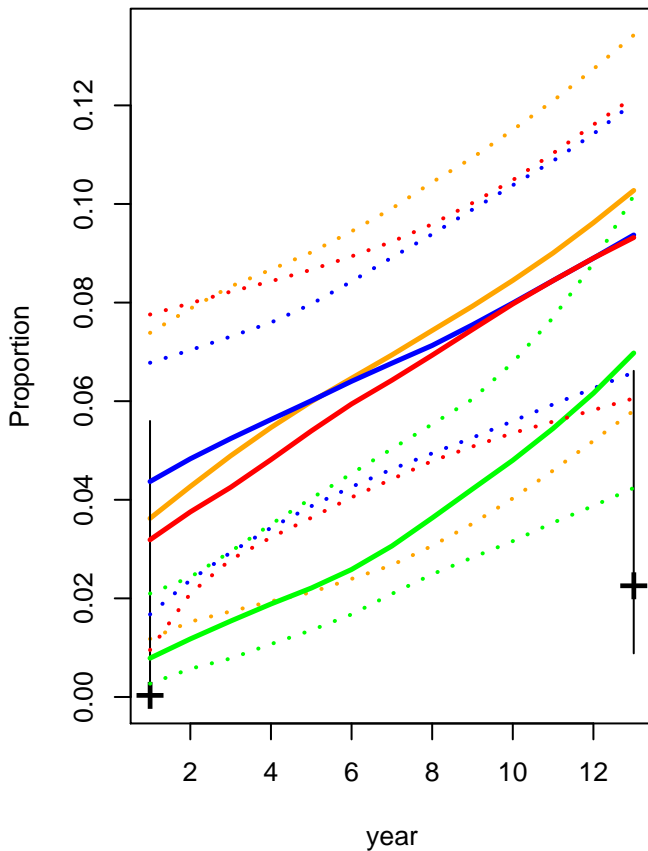

Uninfected

Site 8

Slight Infection

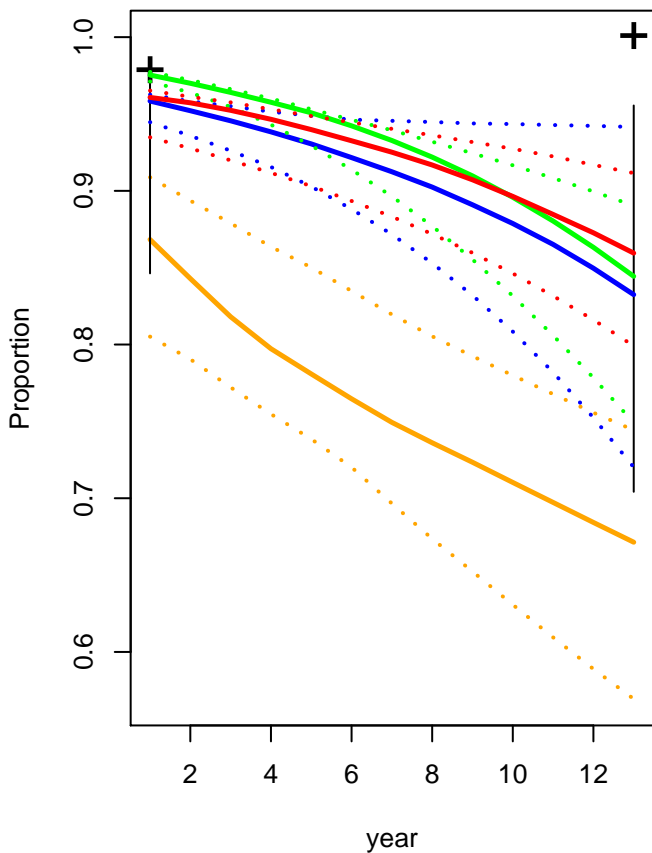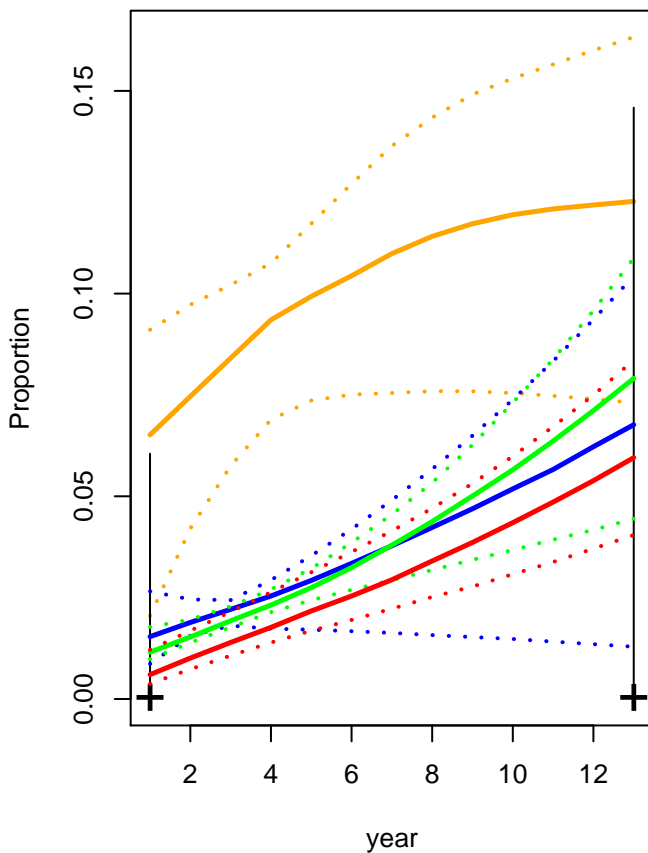

Moderate Infection

Dead

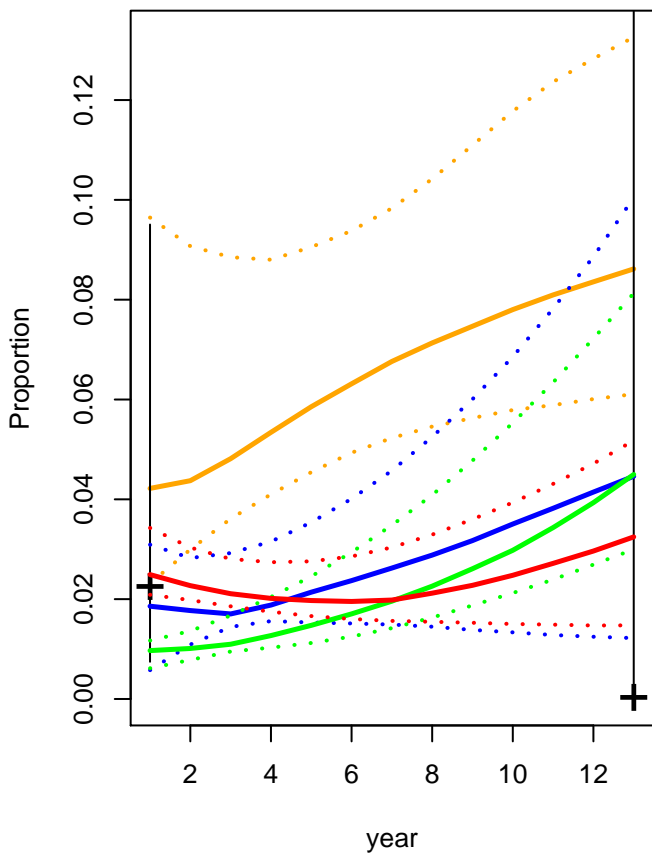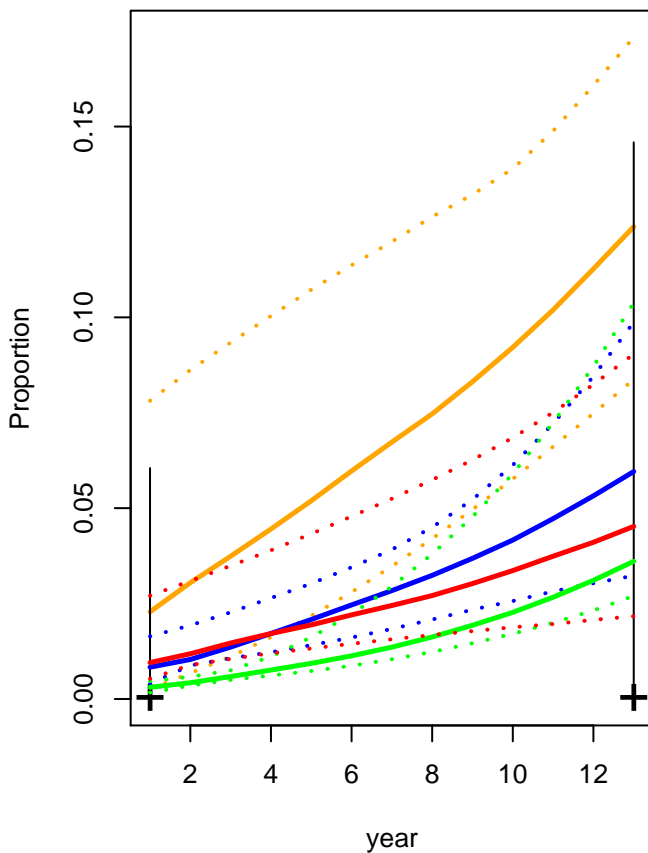

Uninfected

Site 9

Slight Infection

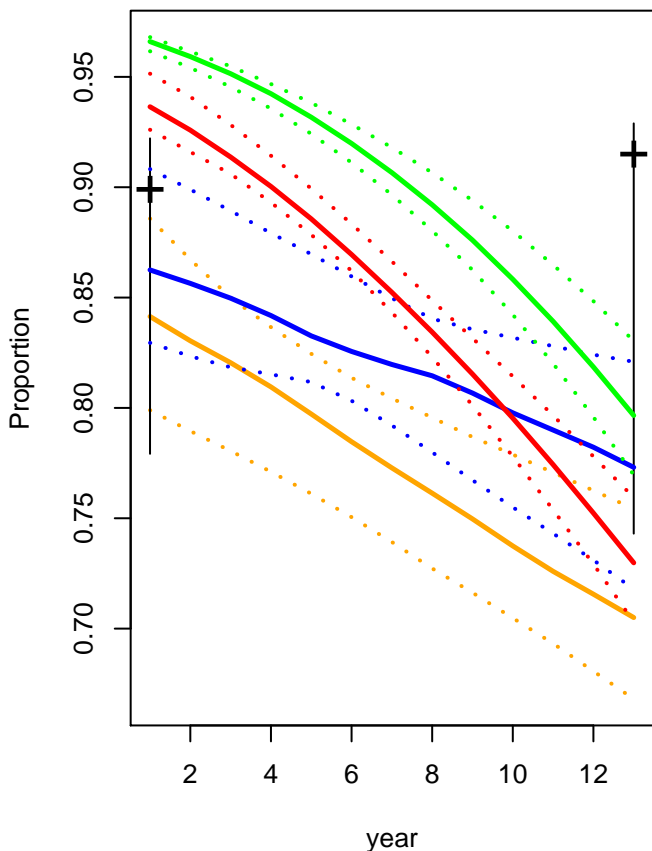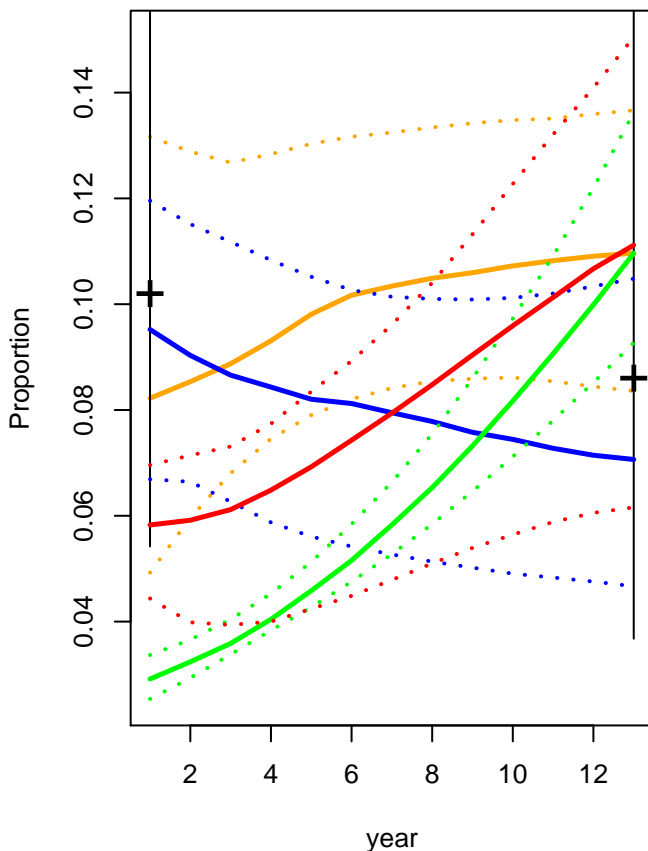

Moderate Infection

Dead

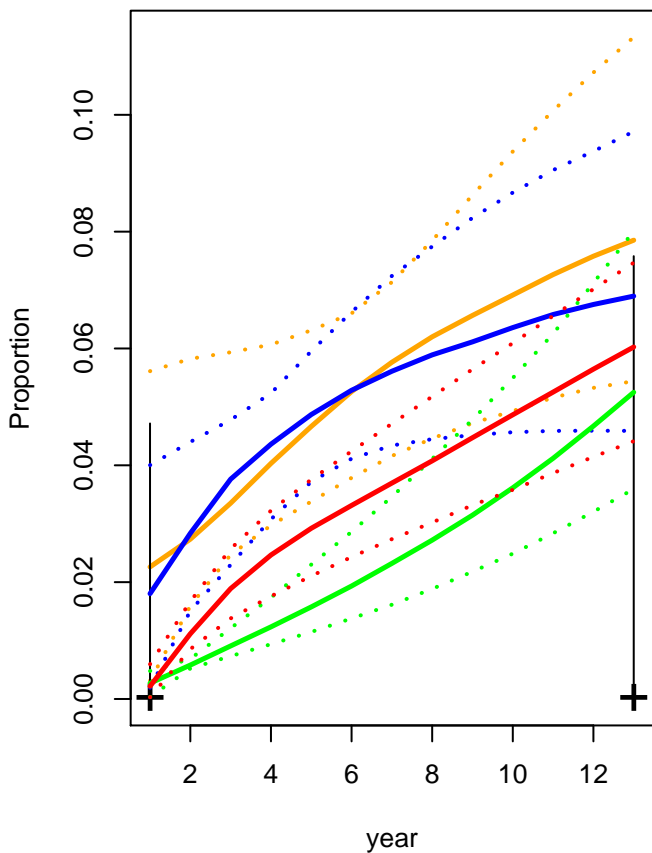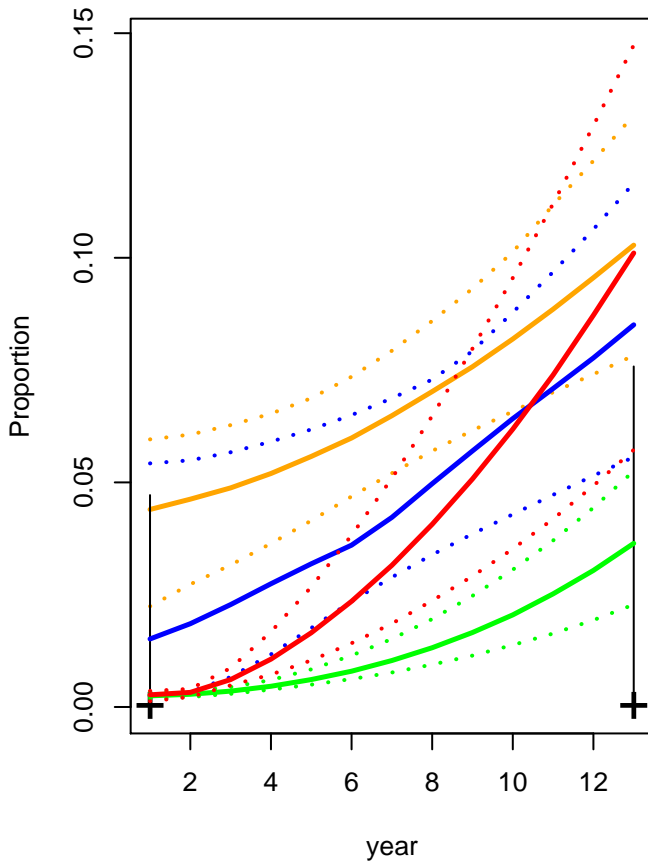

Uninfected

Site 10

Slight Infection

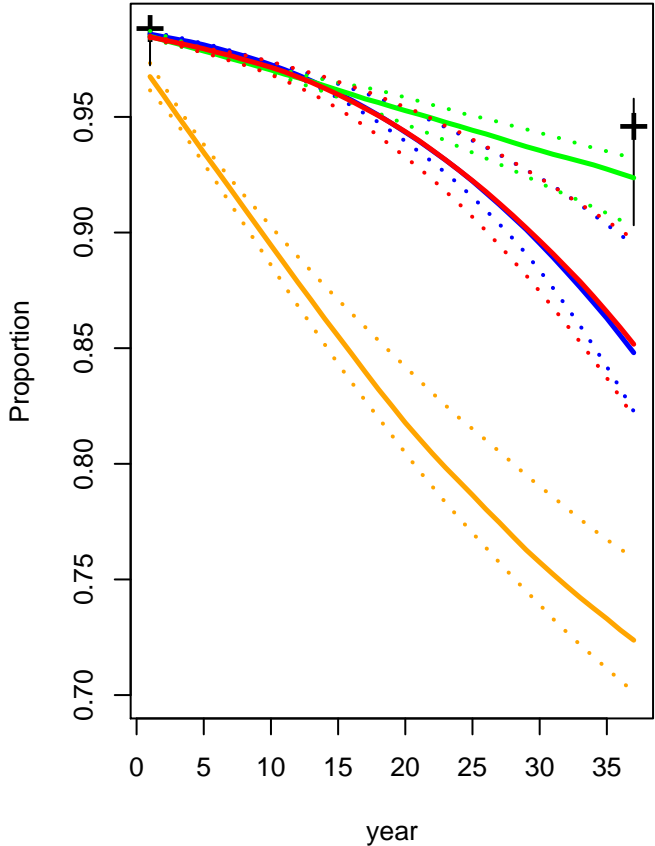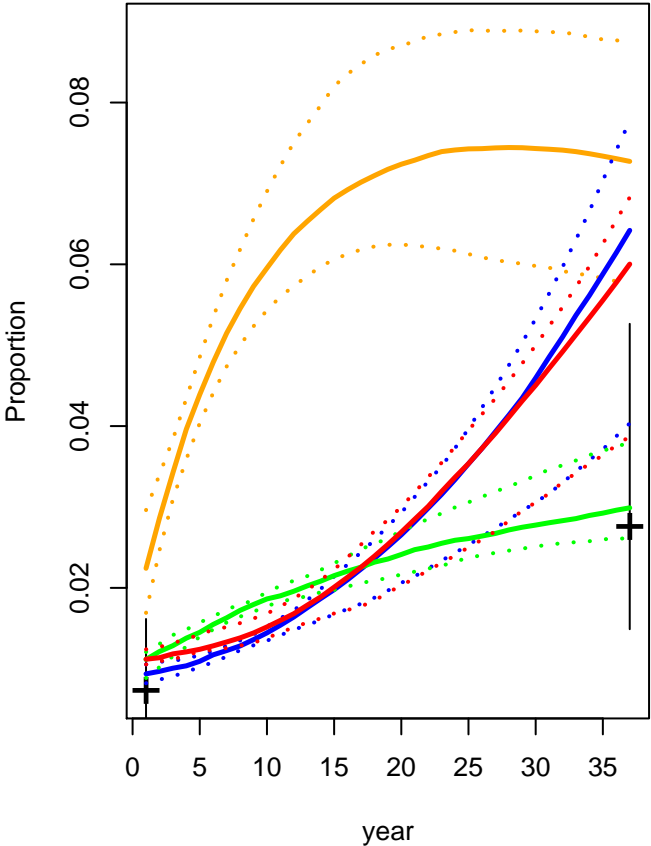

Moderate Infection

Dead

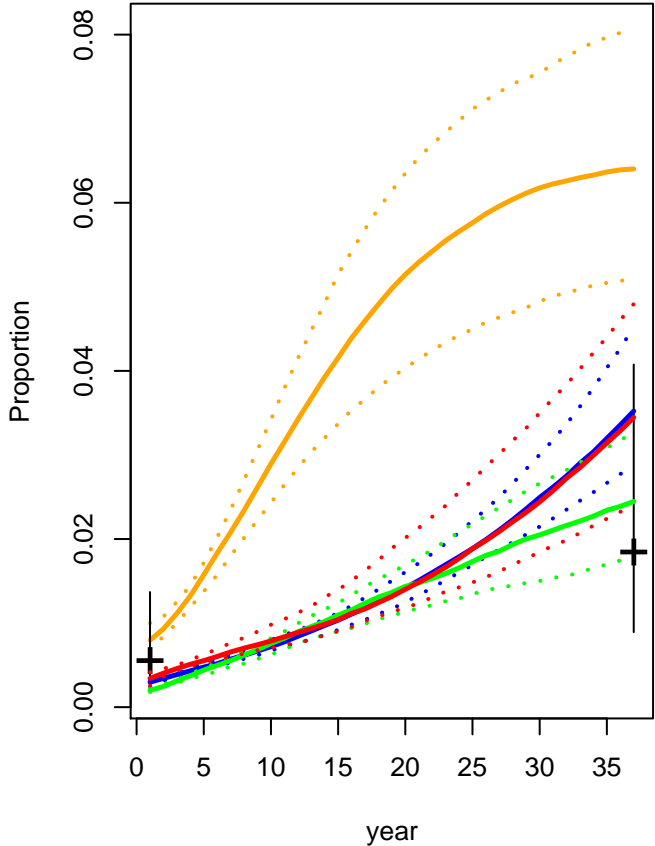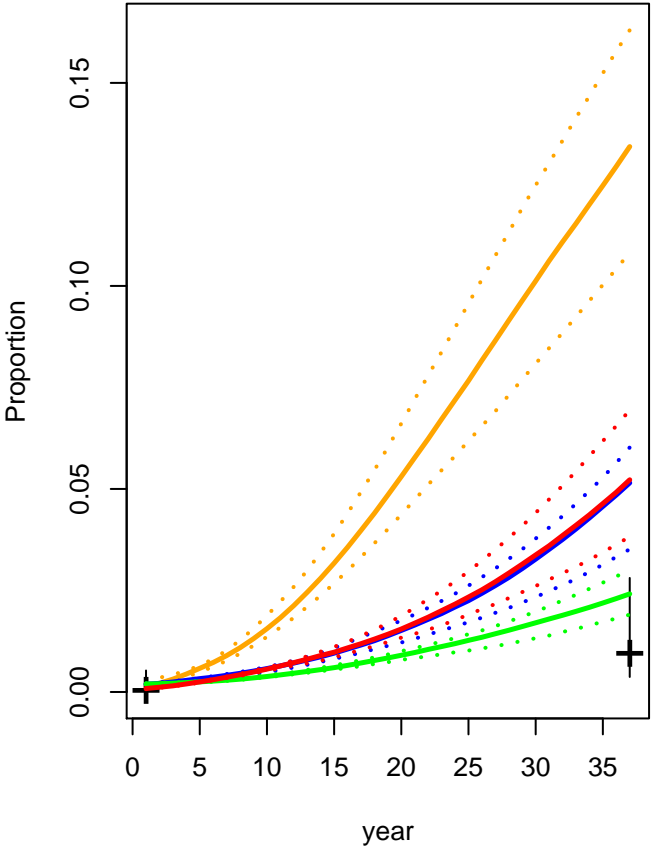

Uninfected

Site 11

Slight Infection

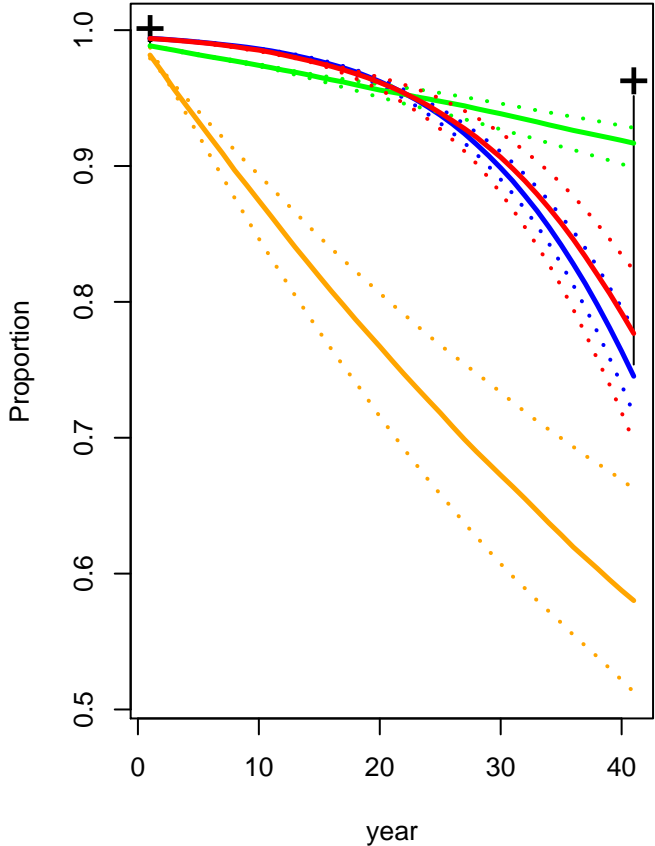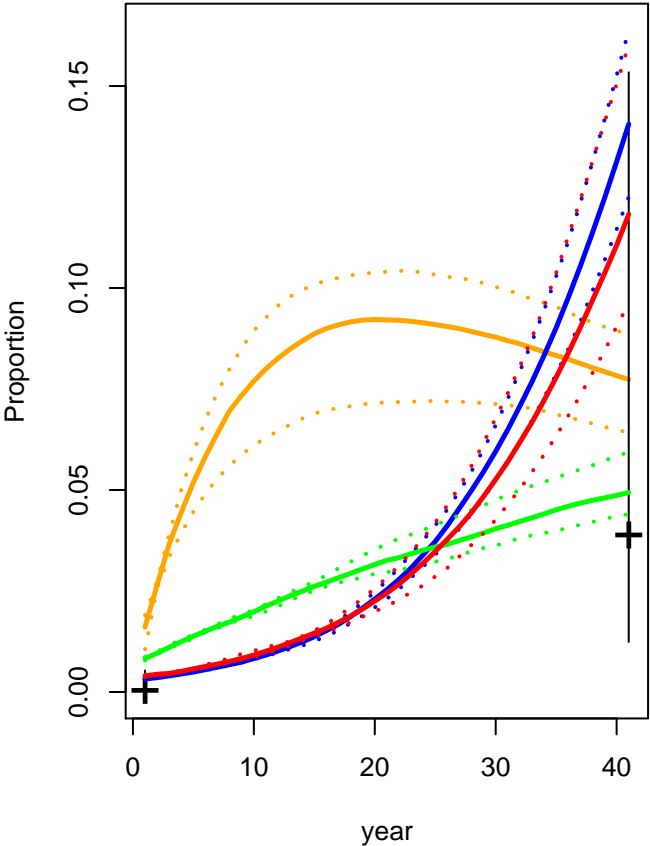

Moderate Infection

Dead

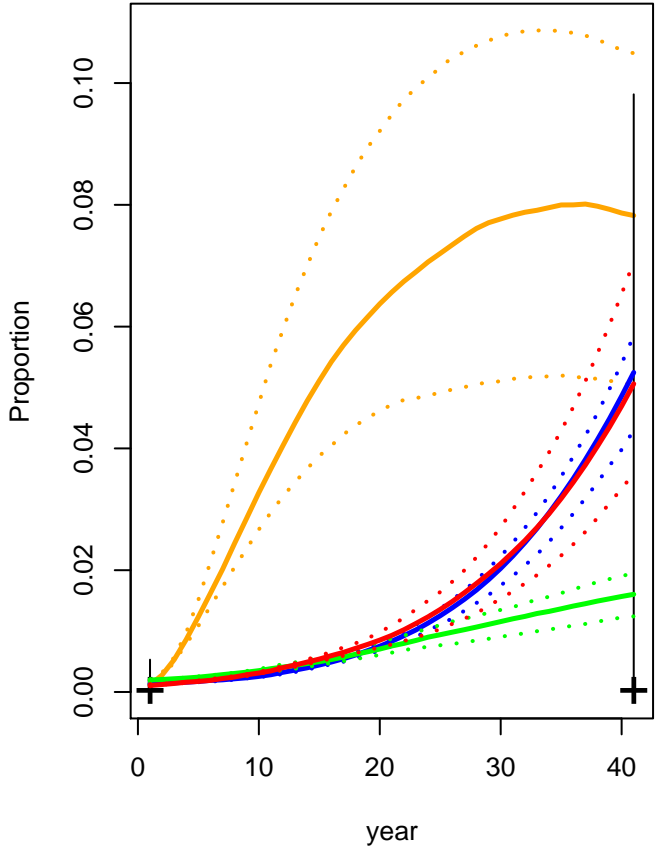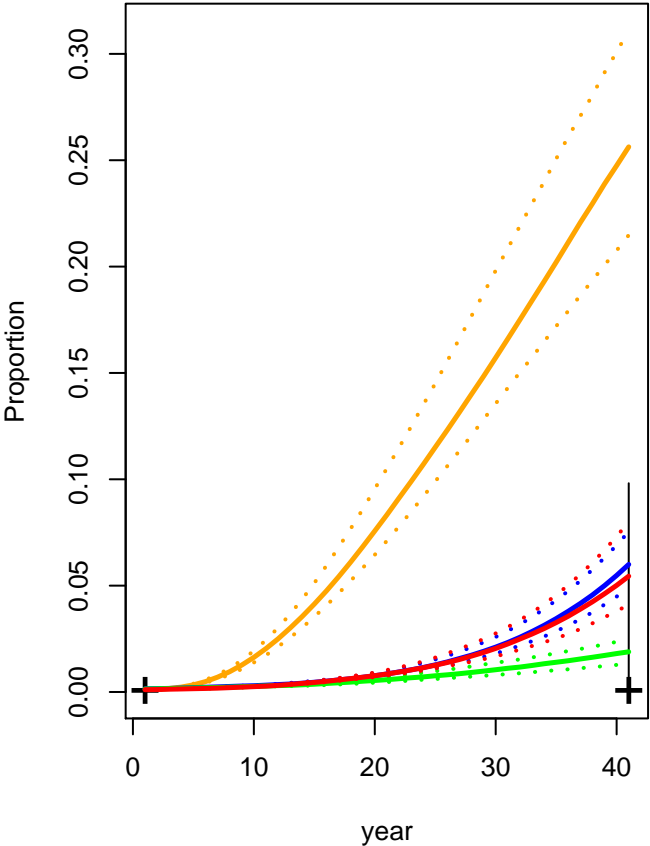

Uninfected

Site 12

Slight Infection

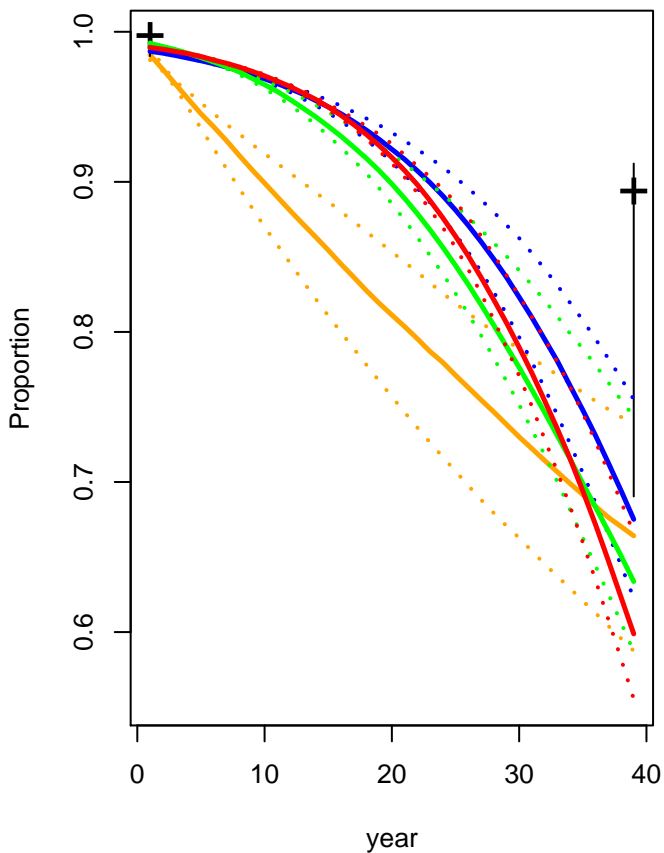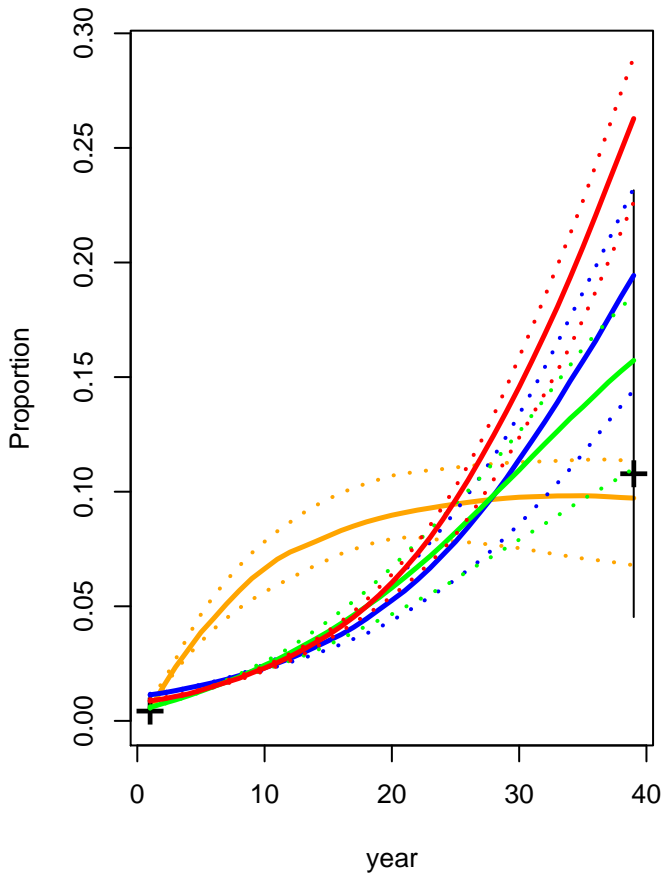

Moderate Infection

Dead

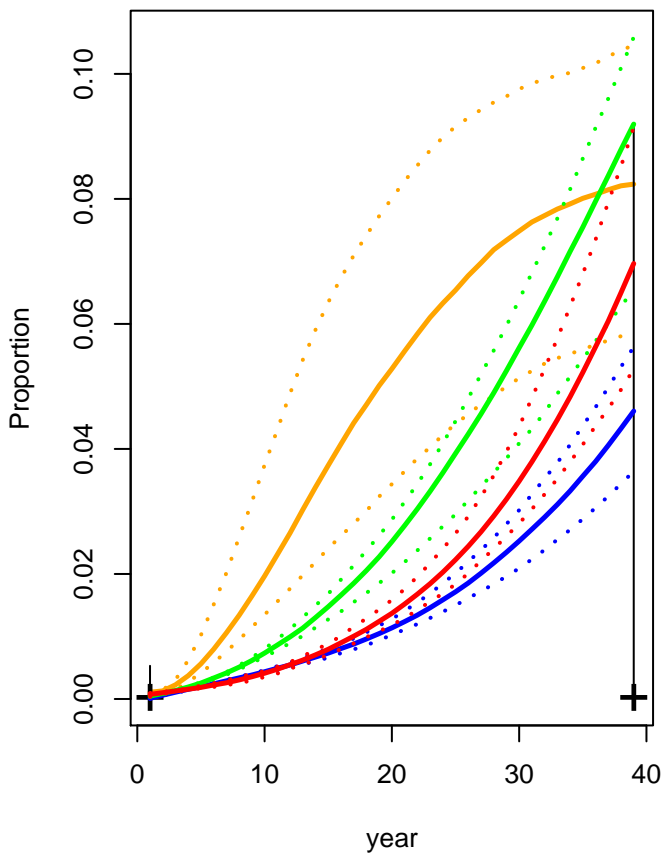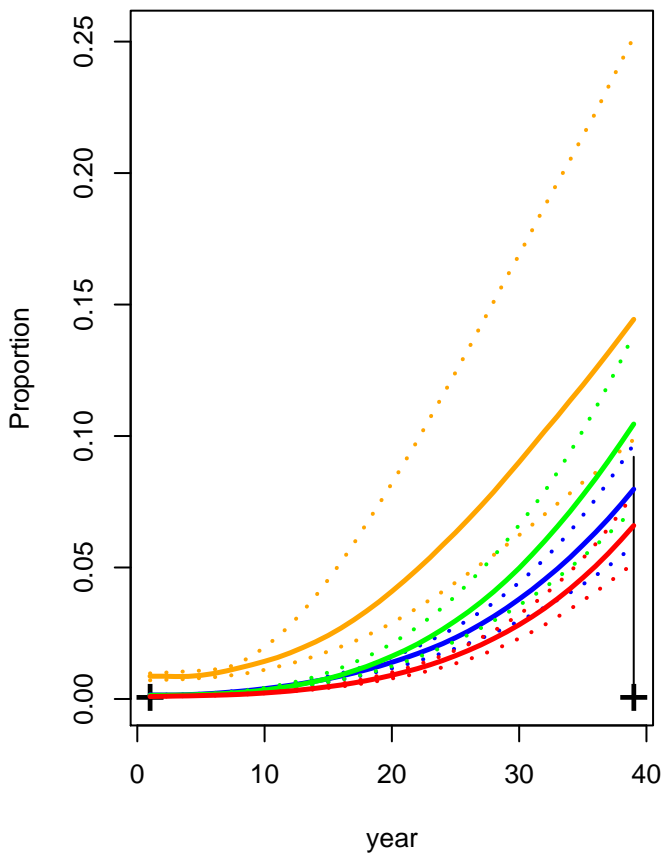

Uninfected

Site 13

Slight Infection

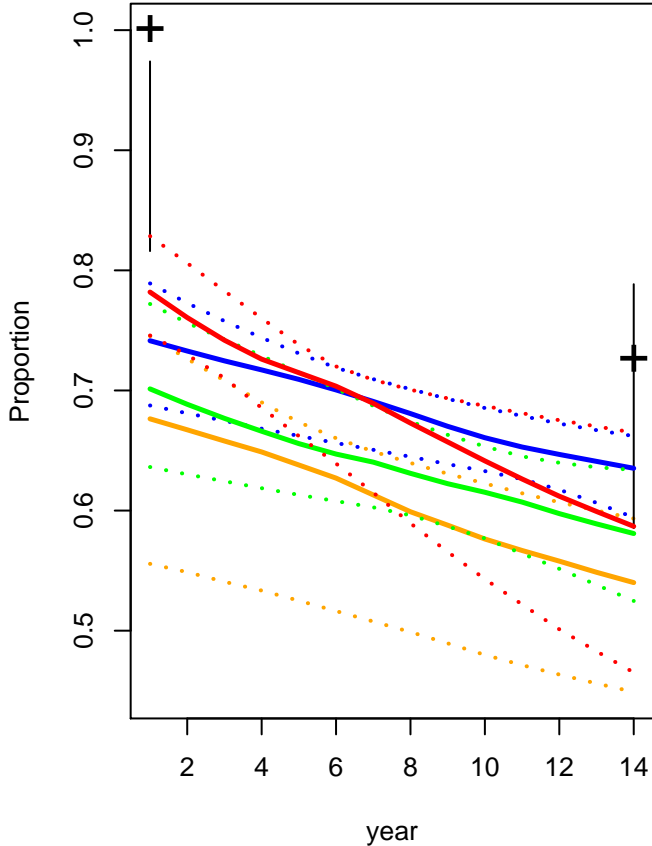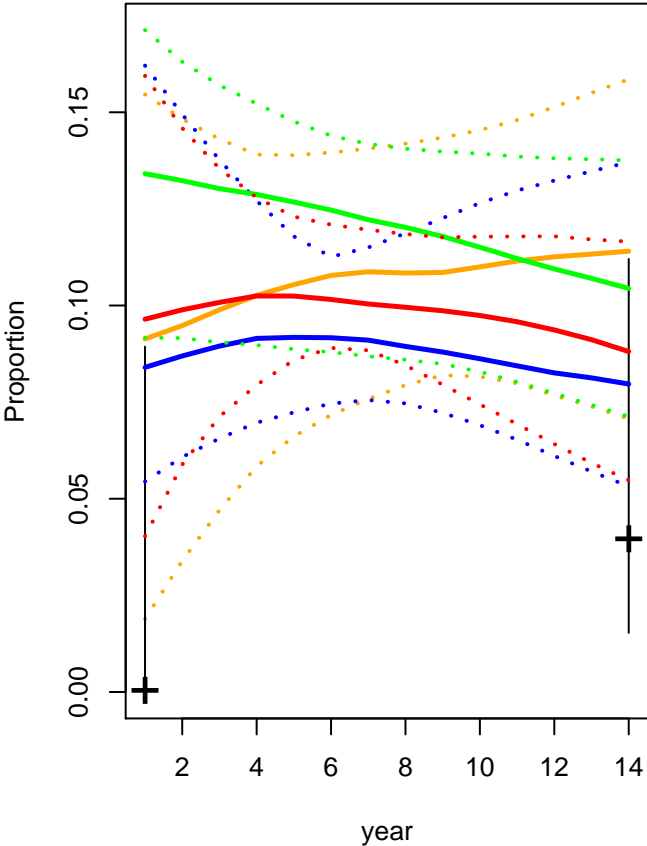

Moderate Infection

Dead

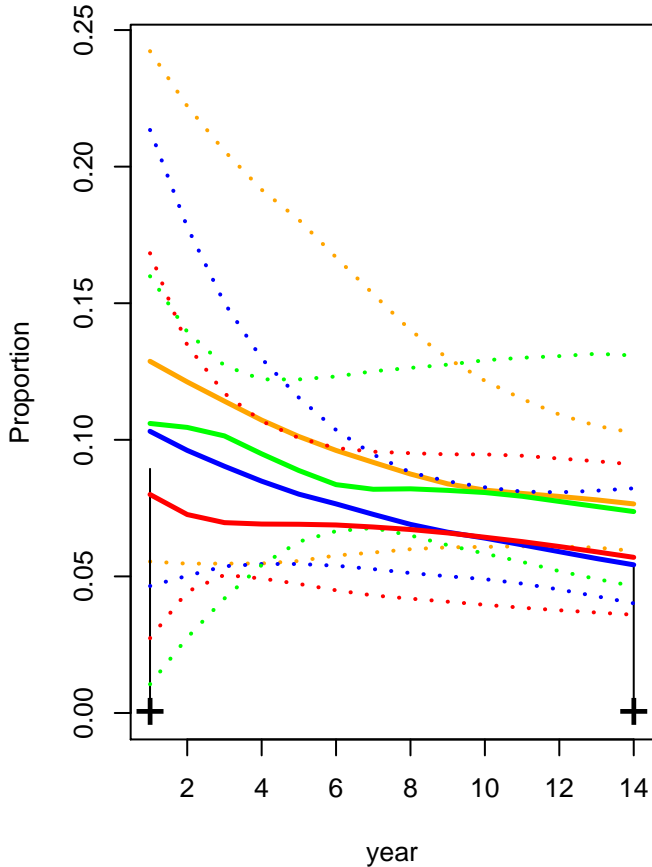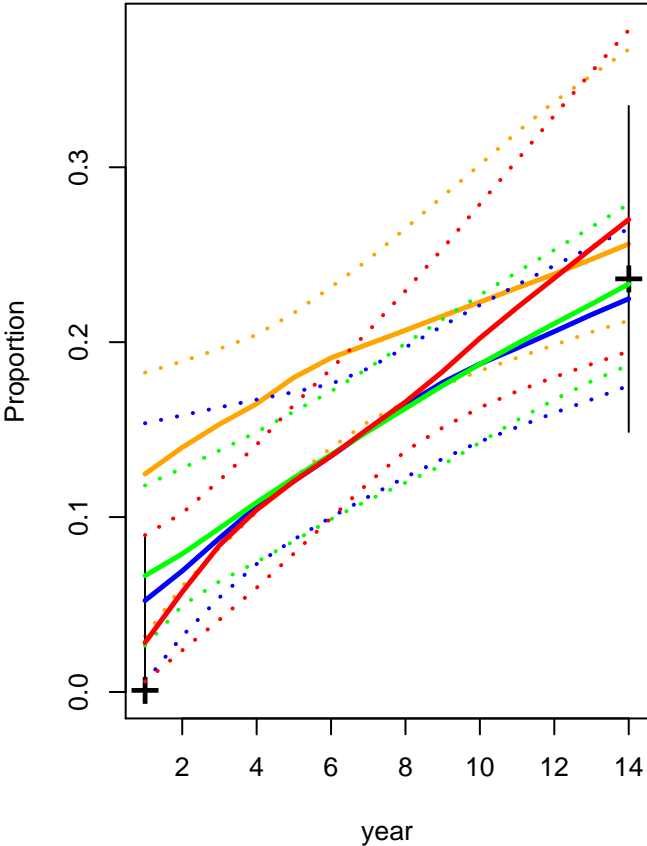

Uninfected

Site 14

Slight Infection

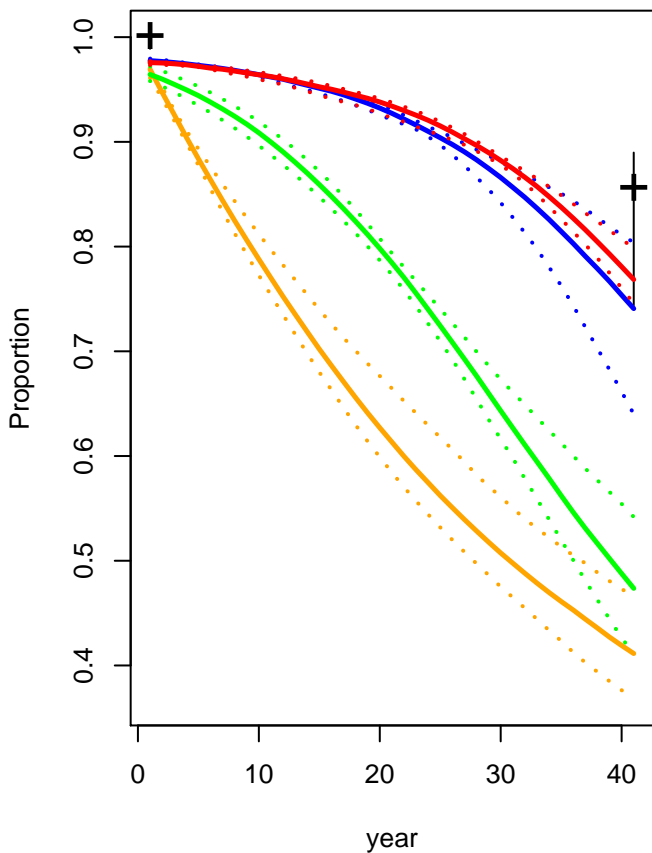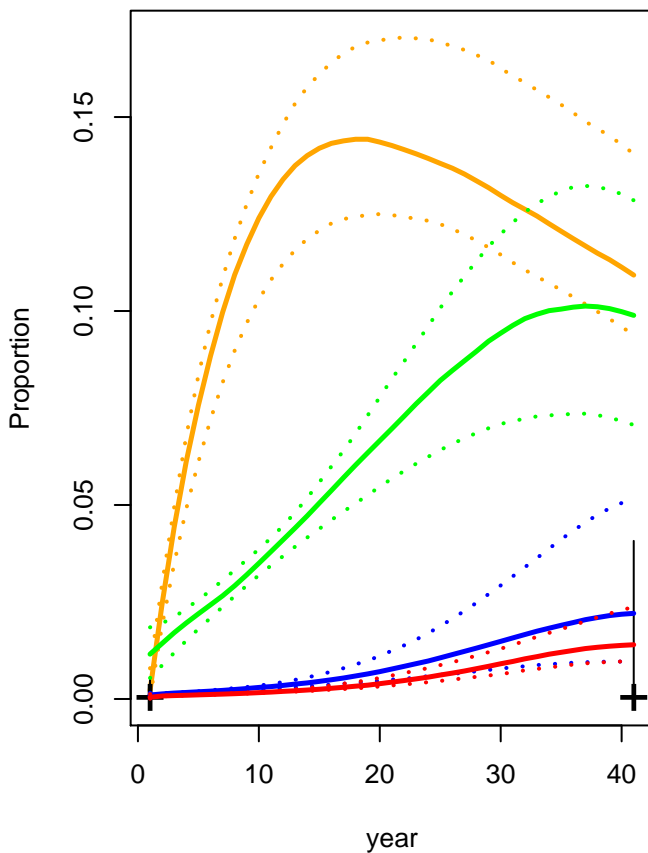

Moderate Infection

Dead

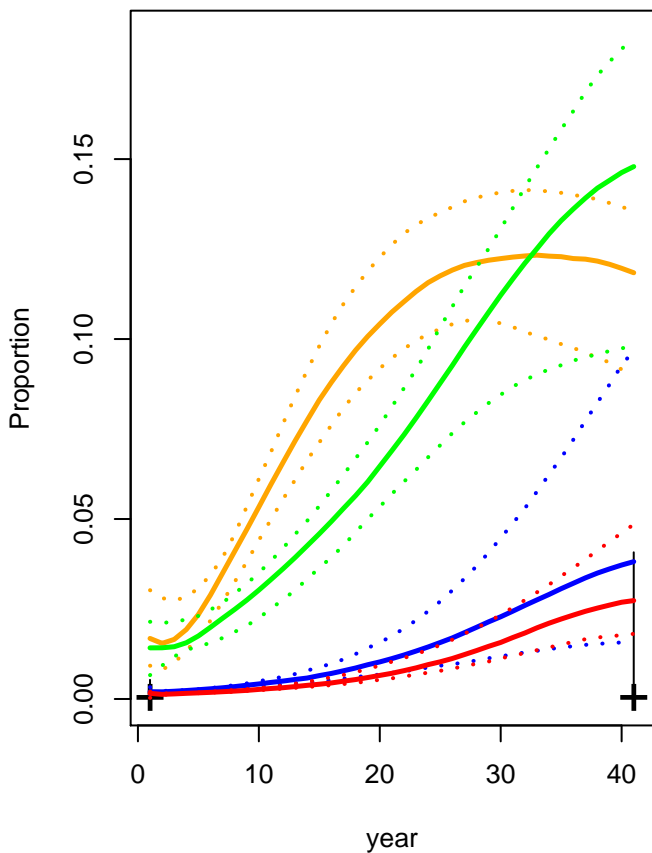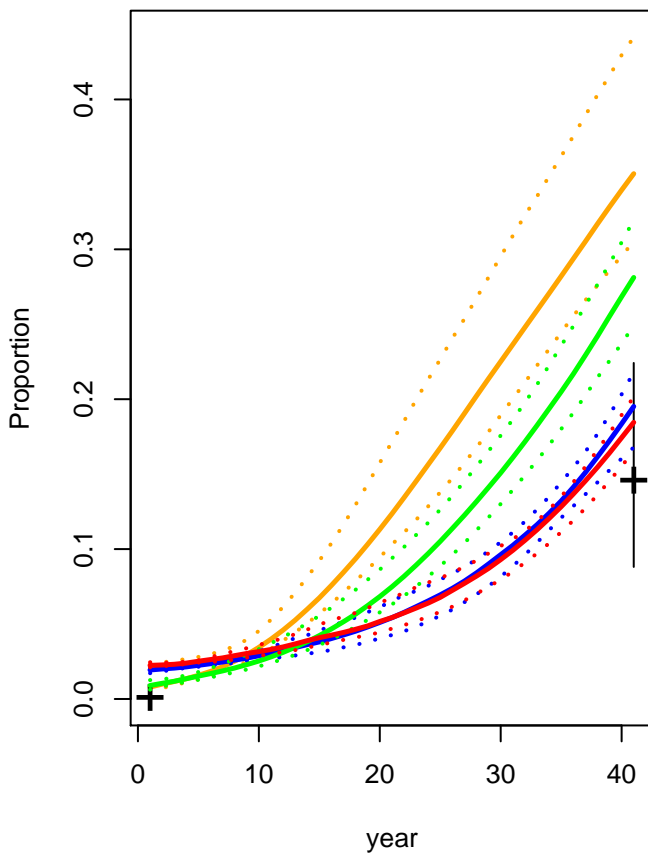



Uninfected

Site 15

Slight Infection

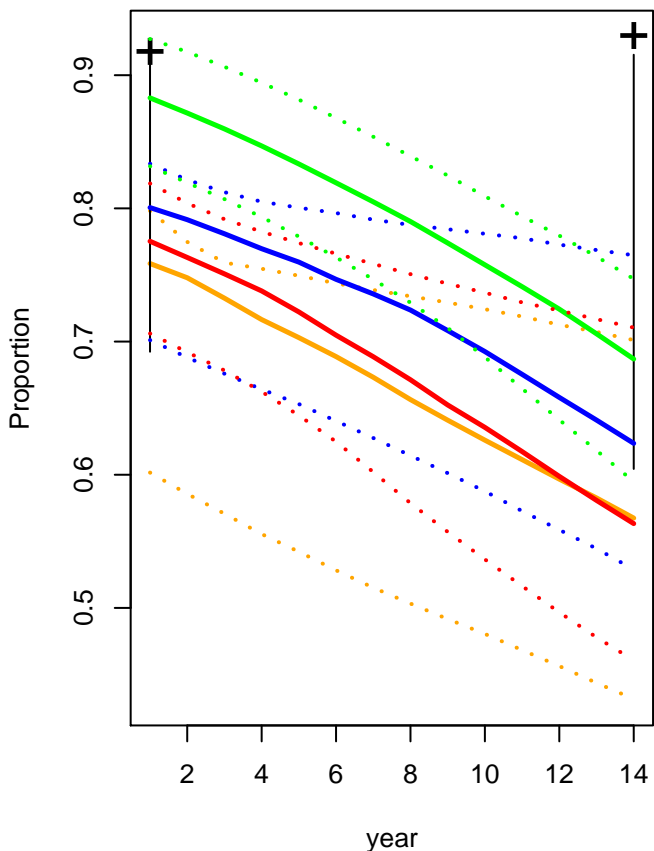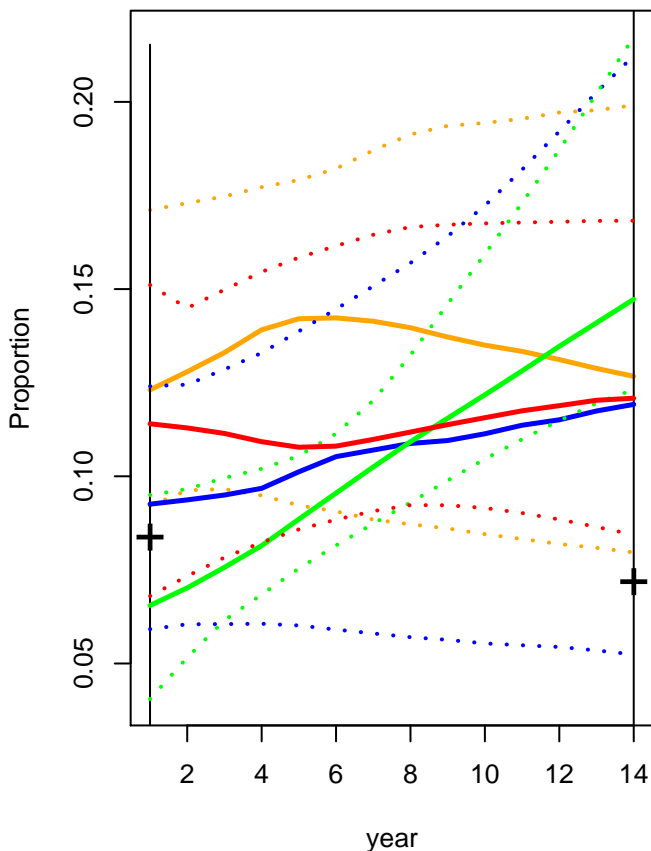

Moderate Infection

Dead

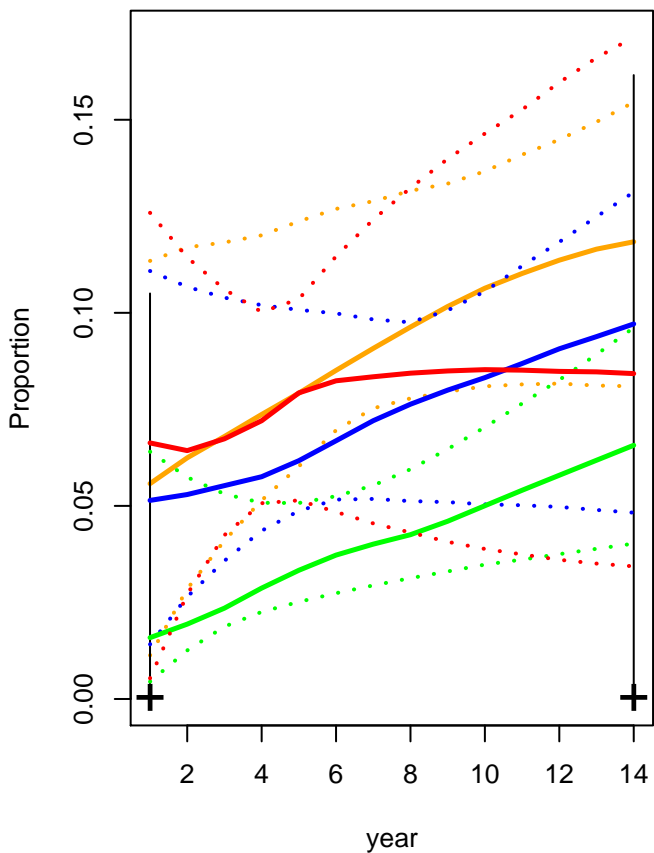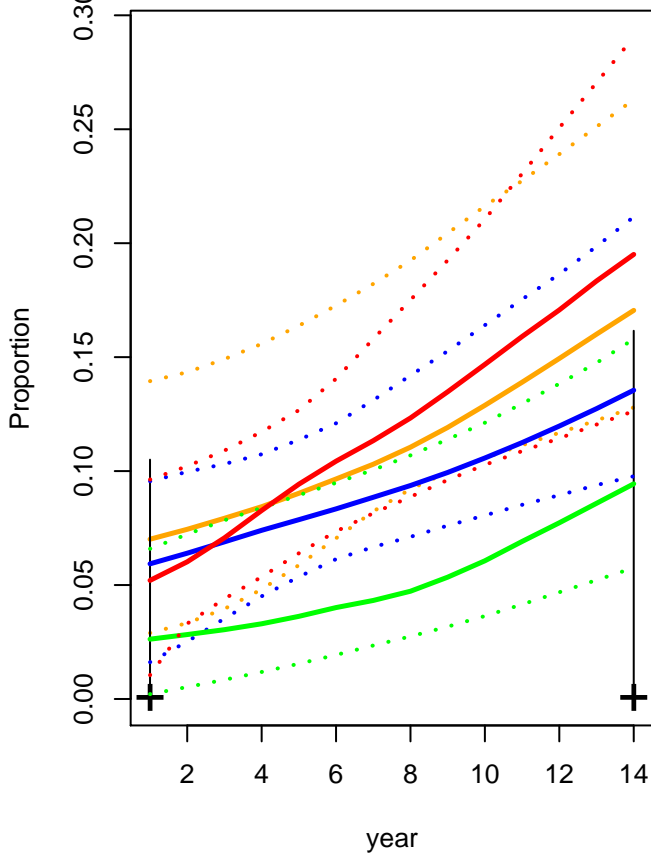

Uninfected

Site 16

Slight Infection

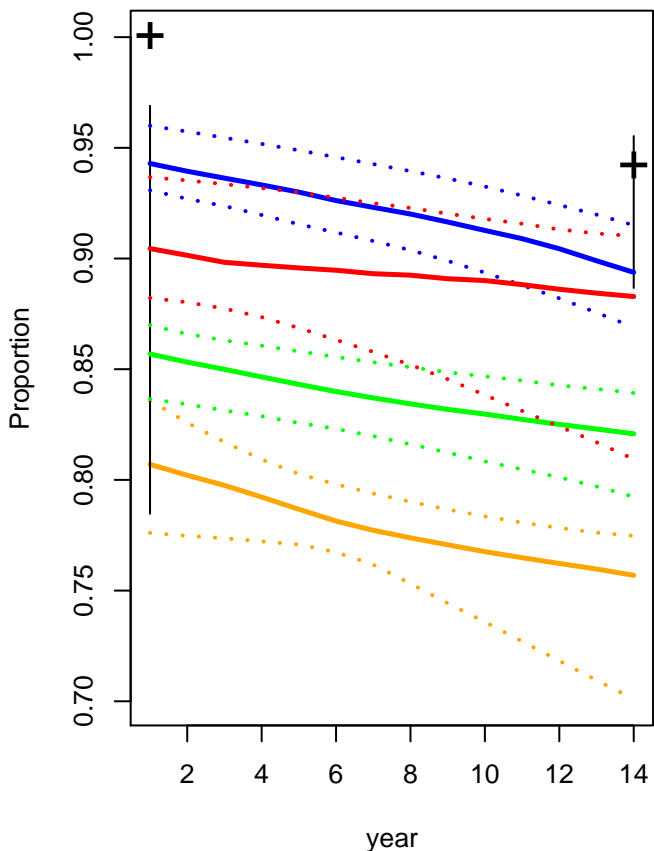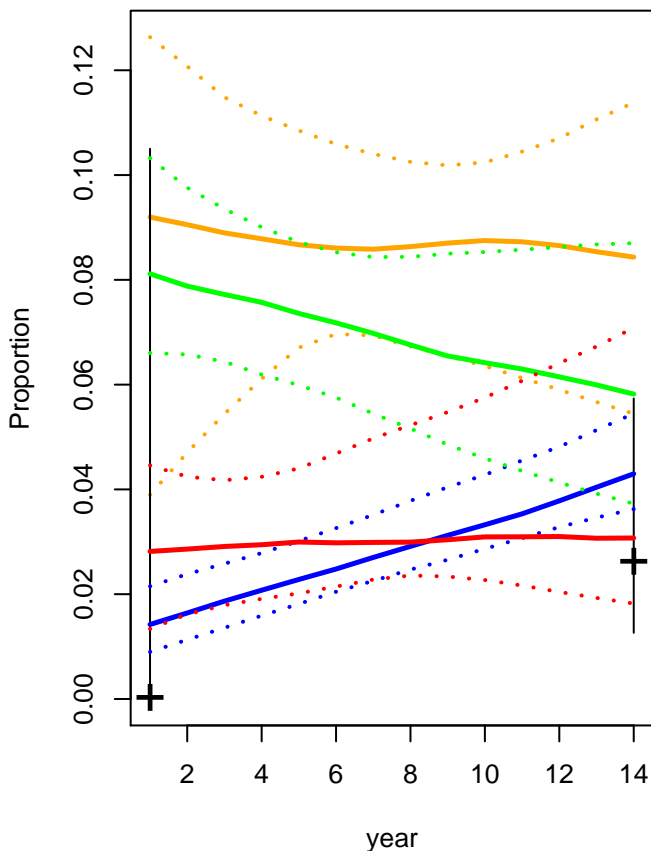

Moderate Infection

Dead

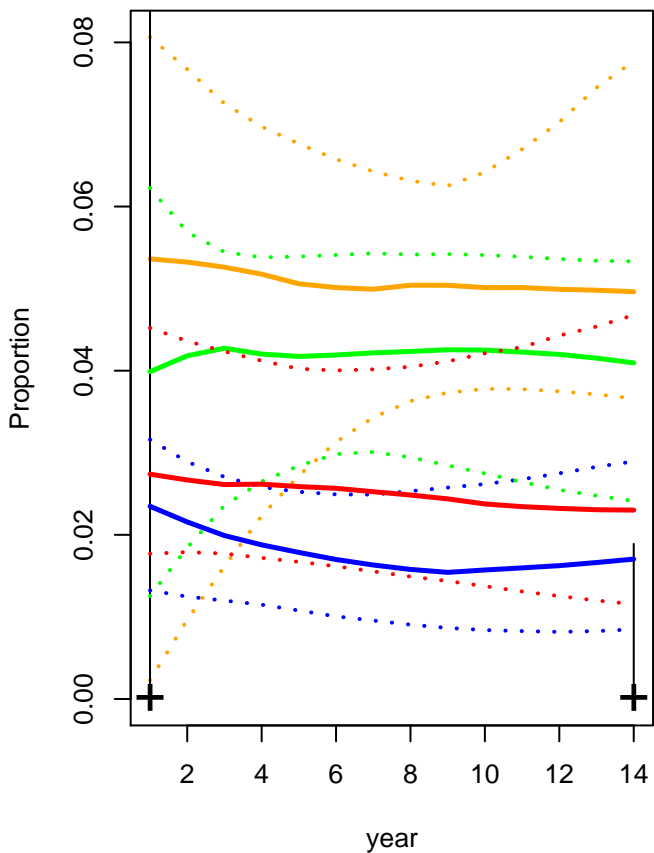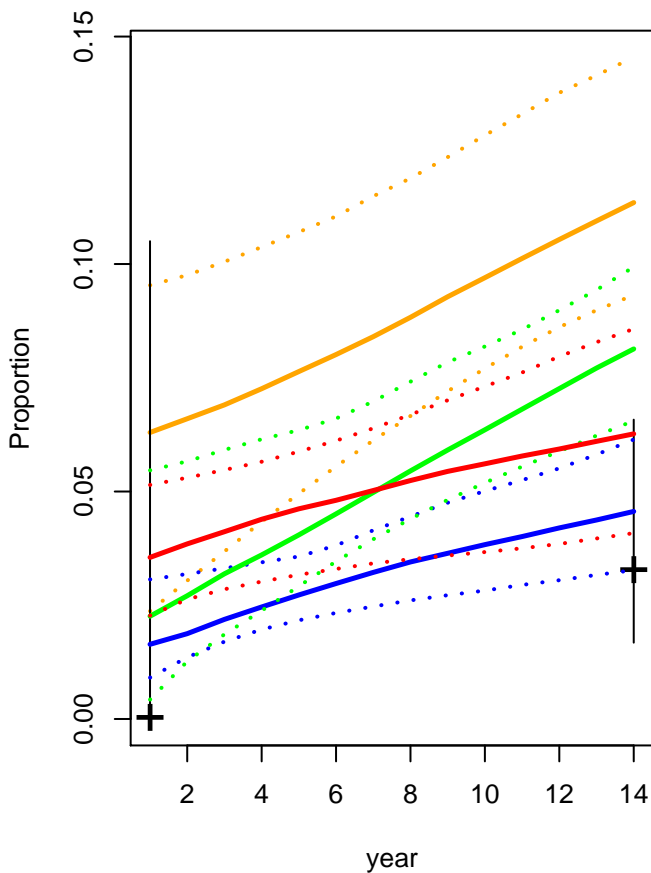

Uninfected

Site 17

Slight Infection

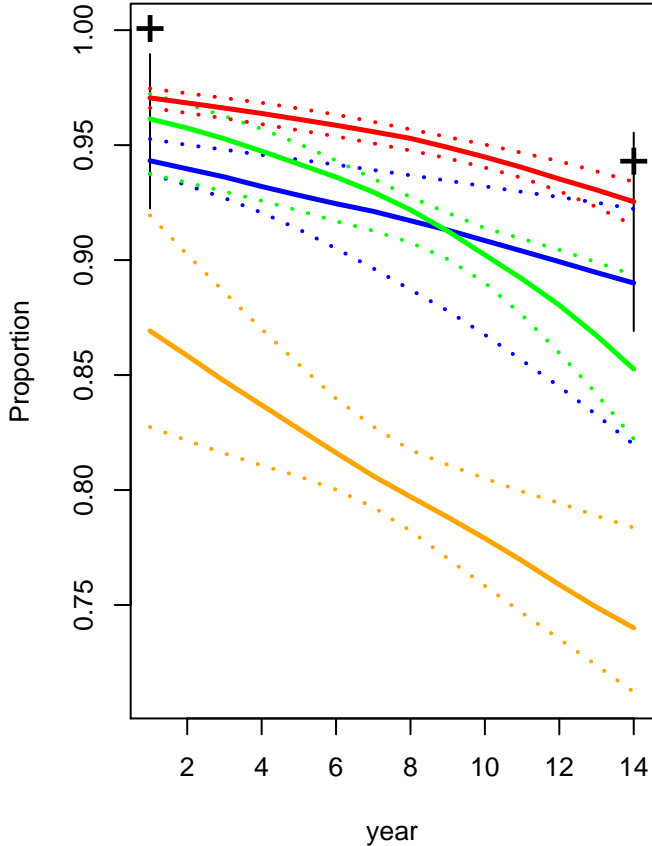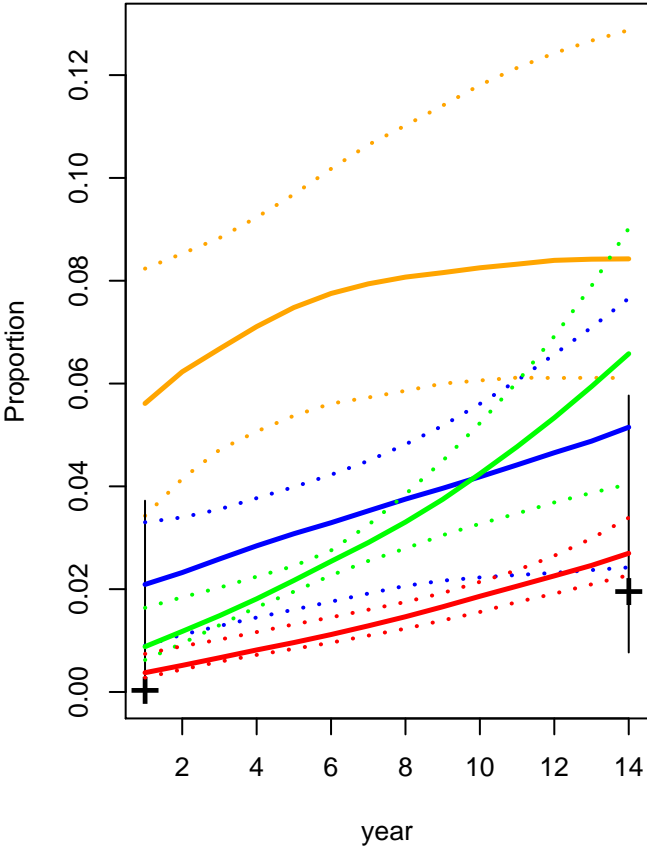

Moderate Infection

Dead

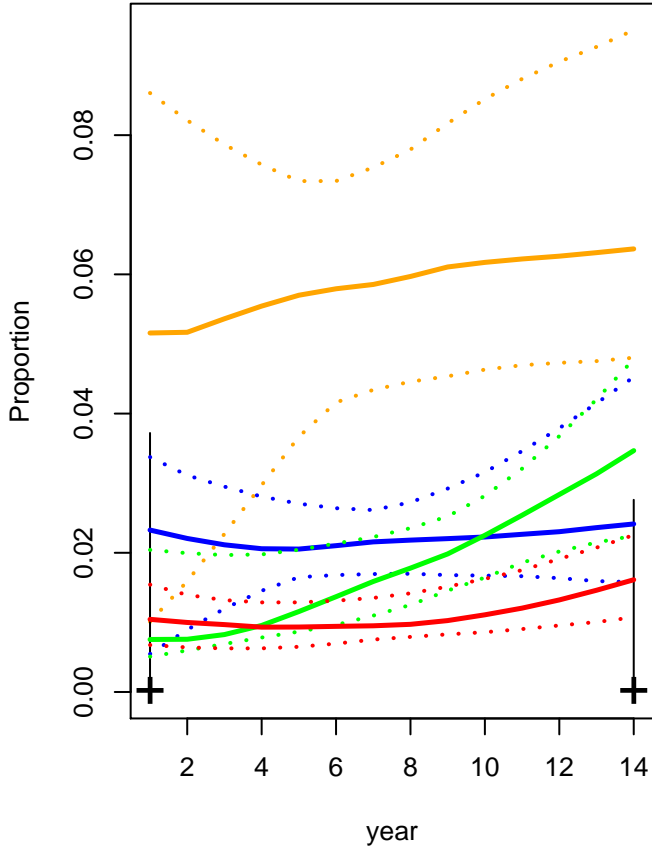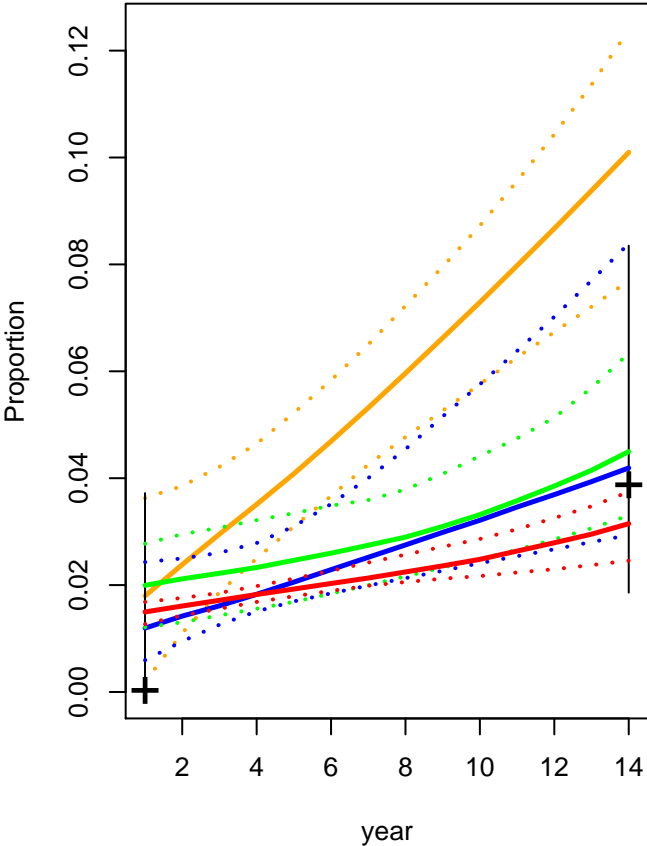

Uninfected

Site 18

Slight Infection

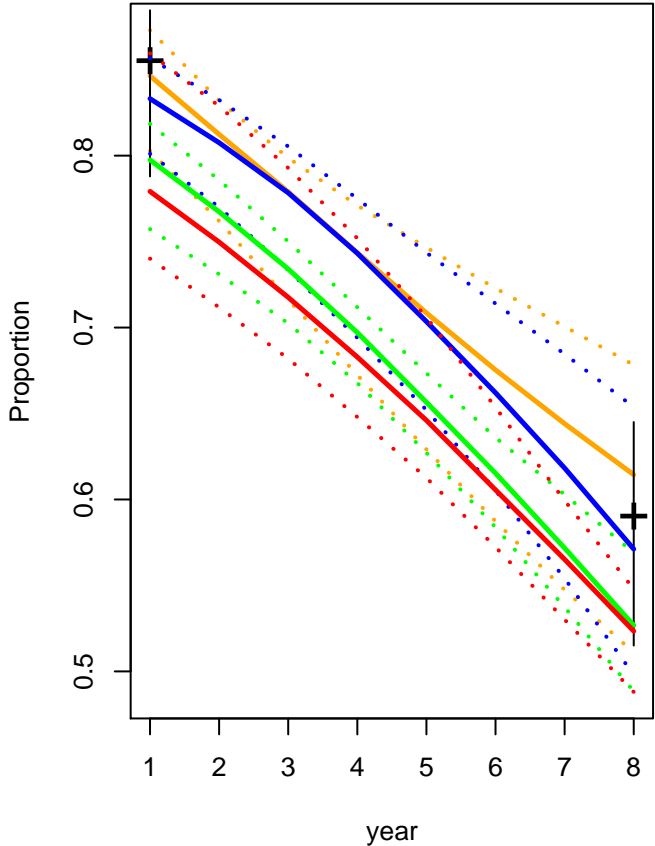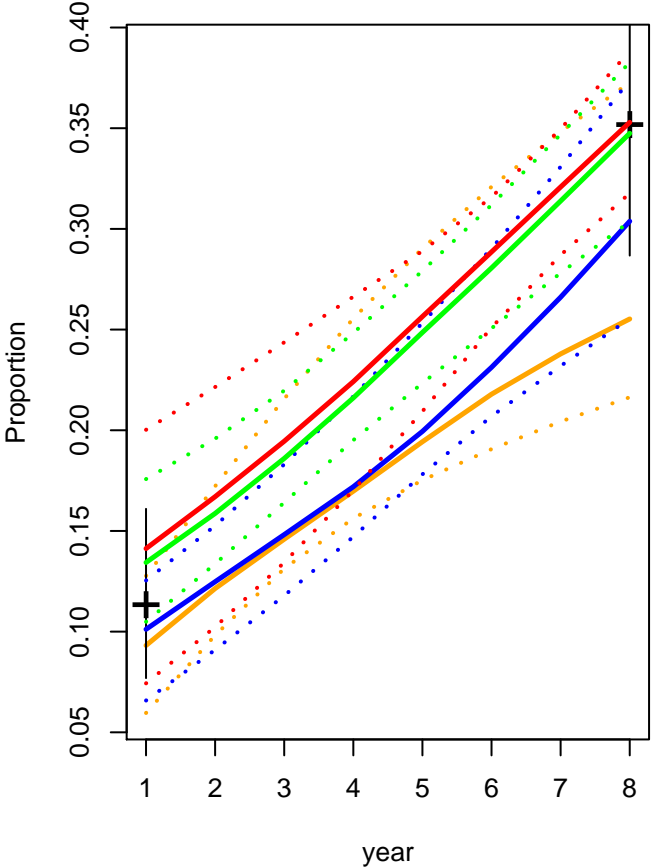

Moderate Infection

Dead

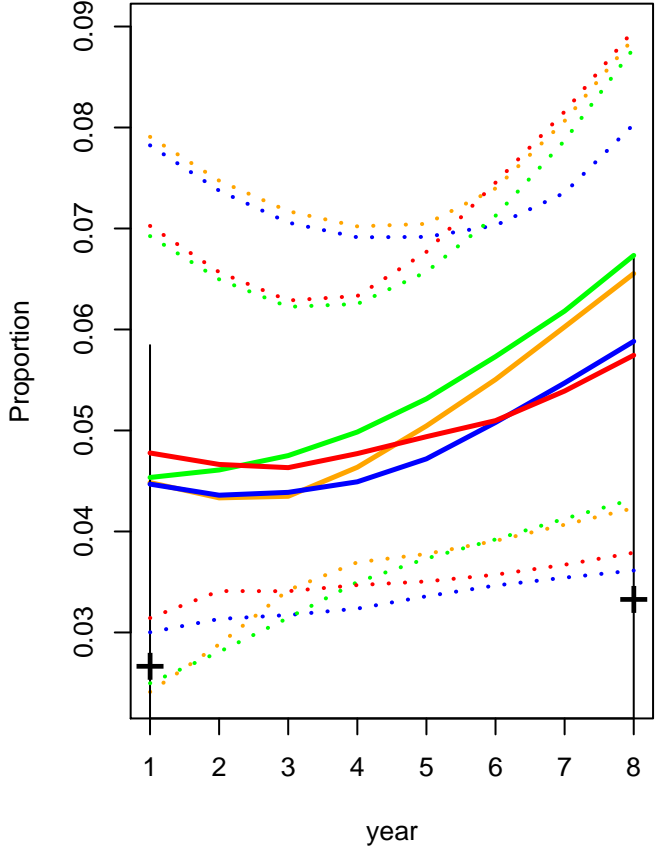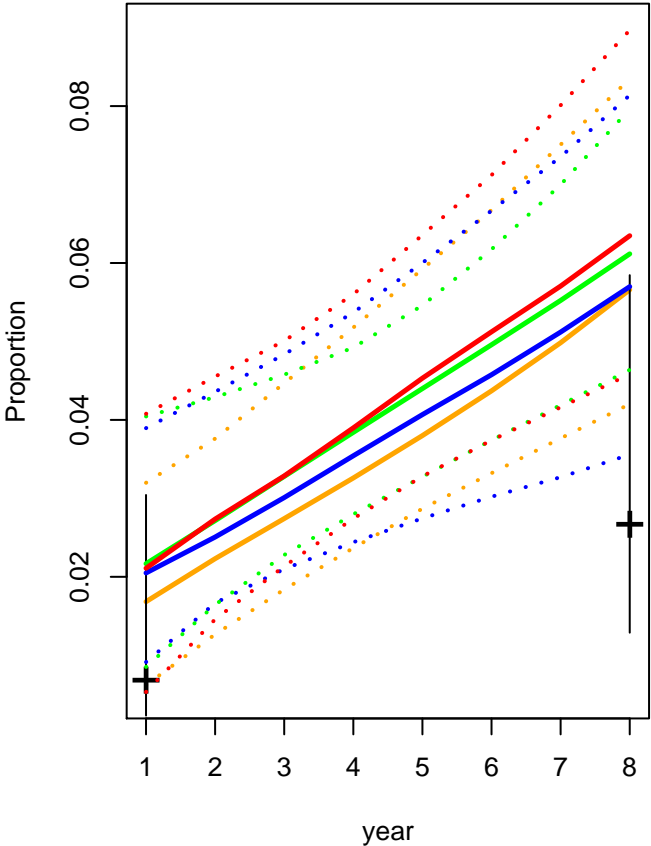

Site 19

Uninfected

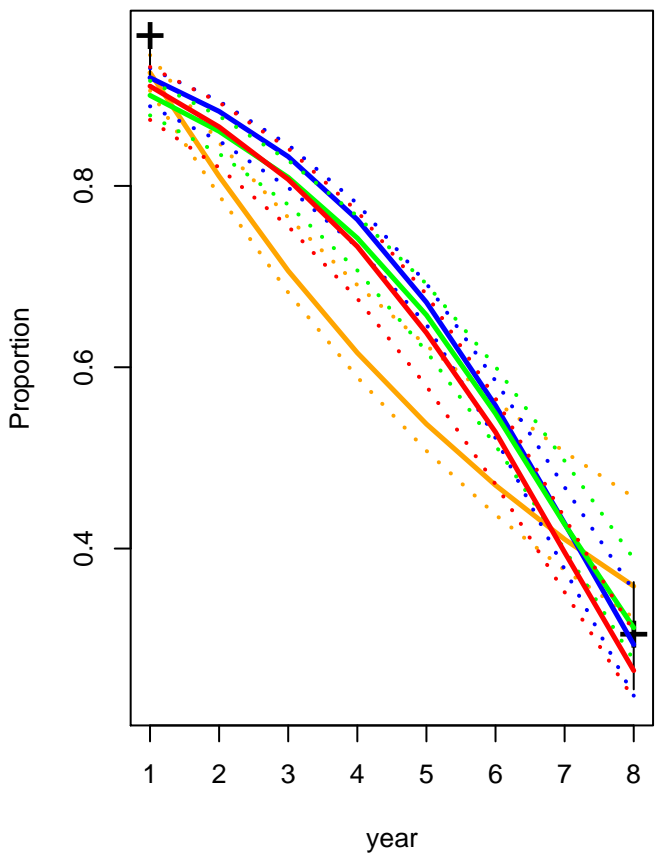

Slight Infection

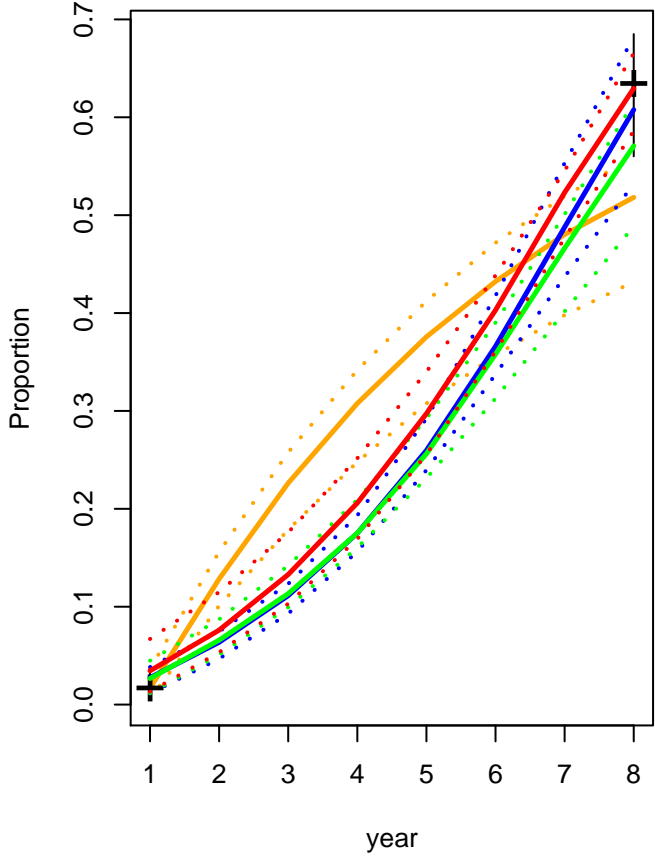

Moderate Infection

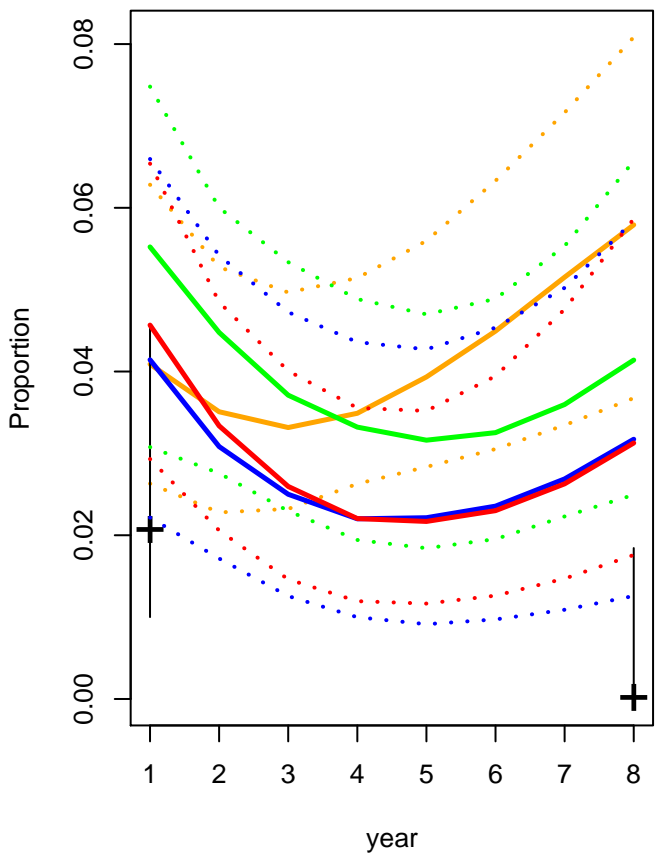

Dead

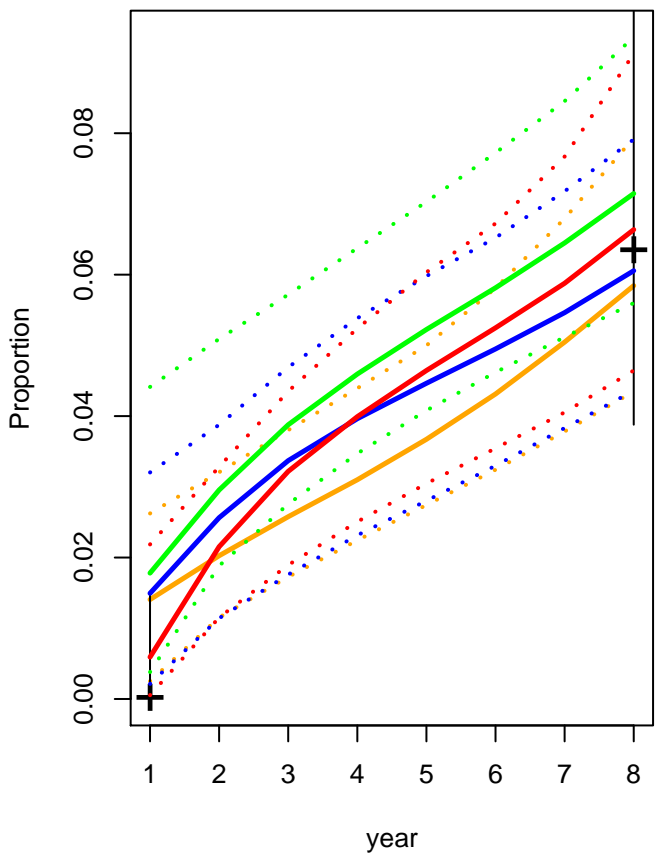

Uninfected

Site 20

Slight Infection

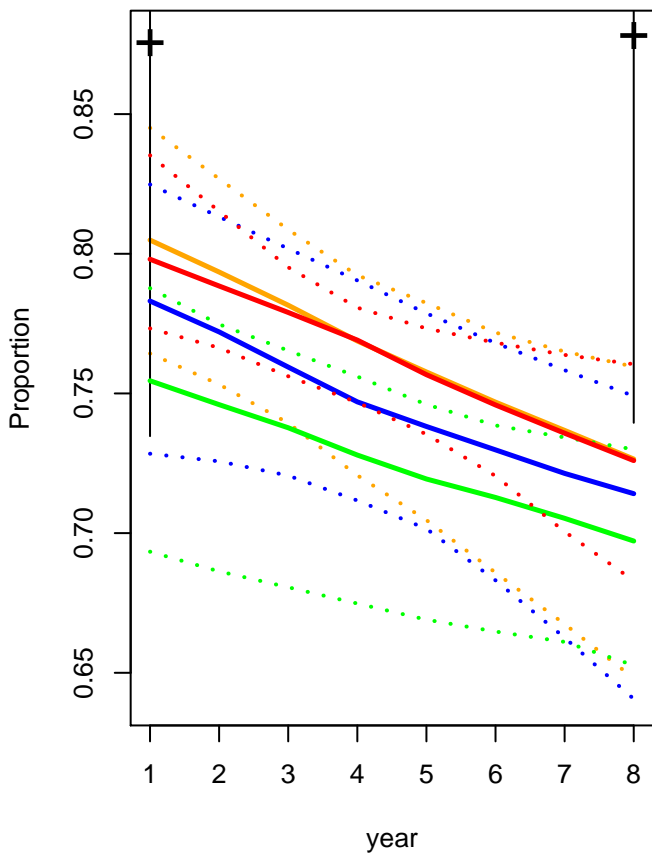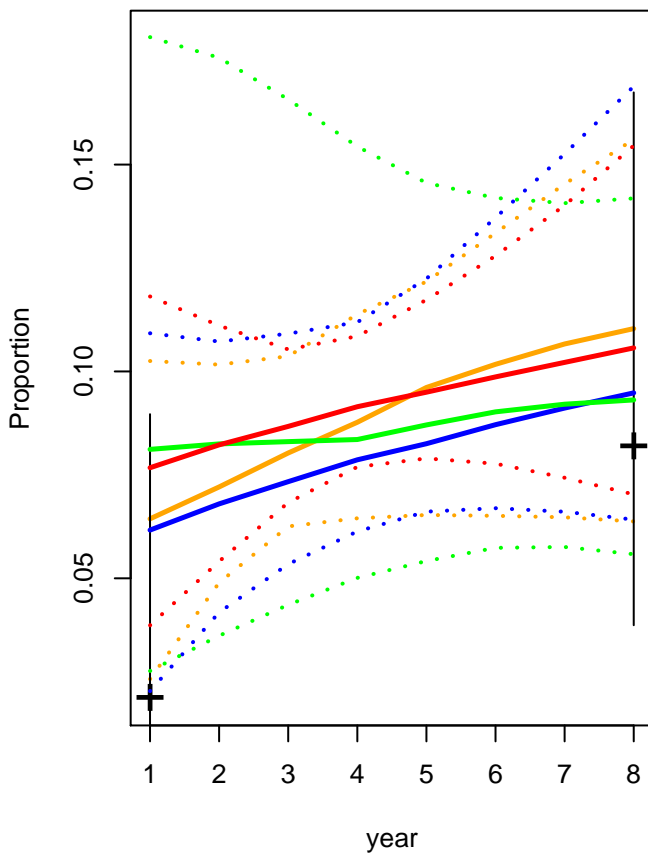

Moderate Infection

Dead

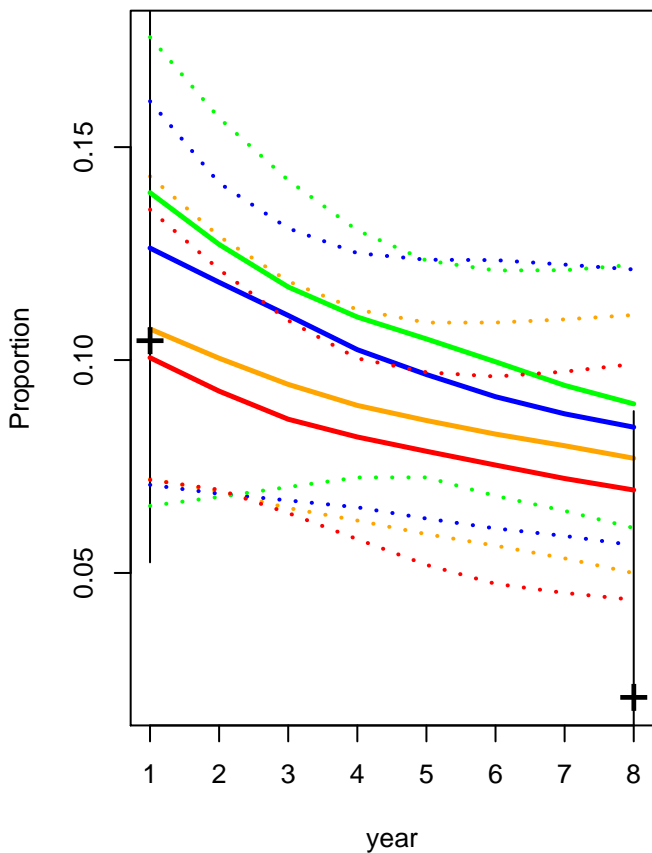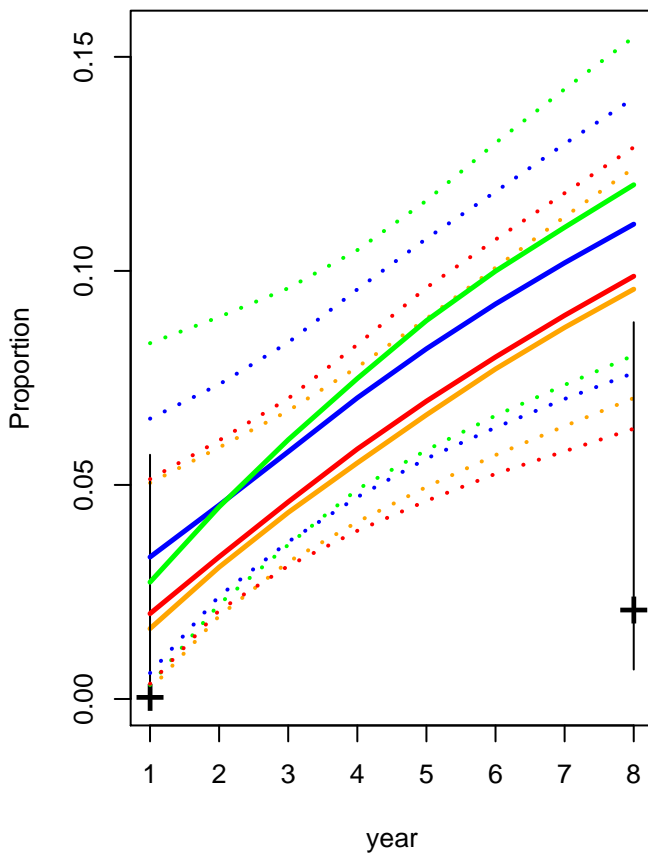

Uninfected

Site 21

Slight Infection

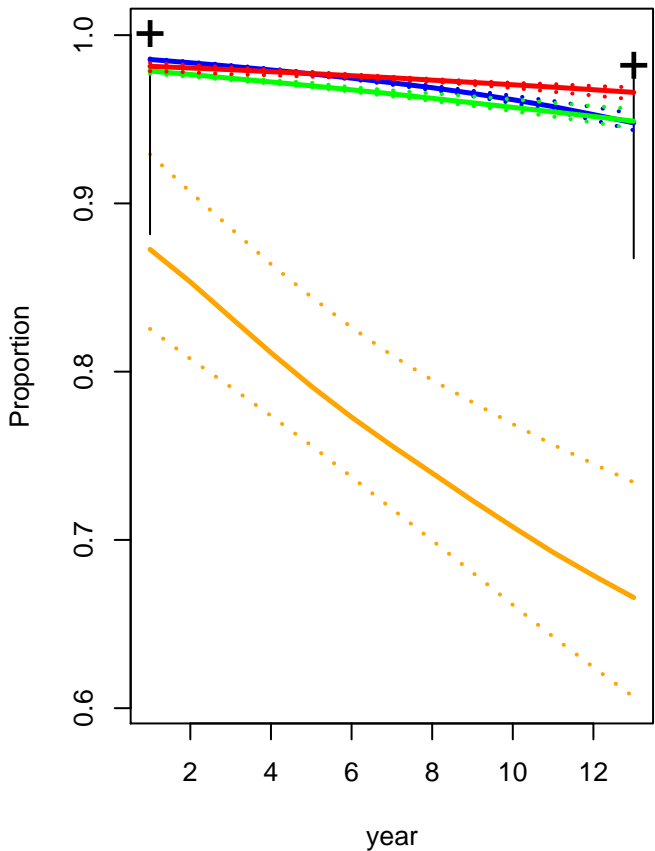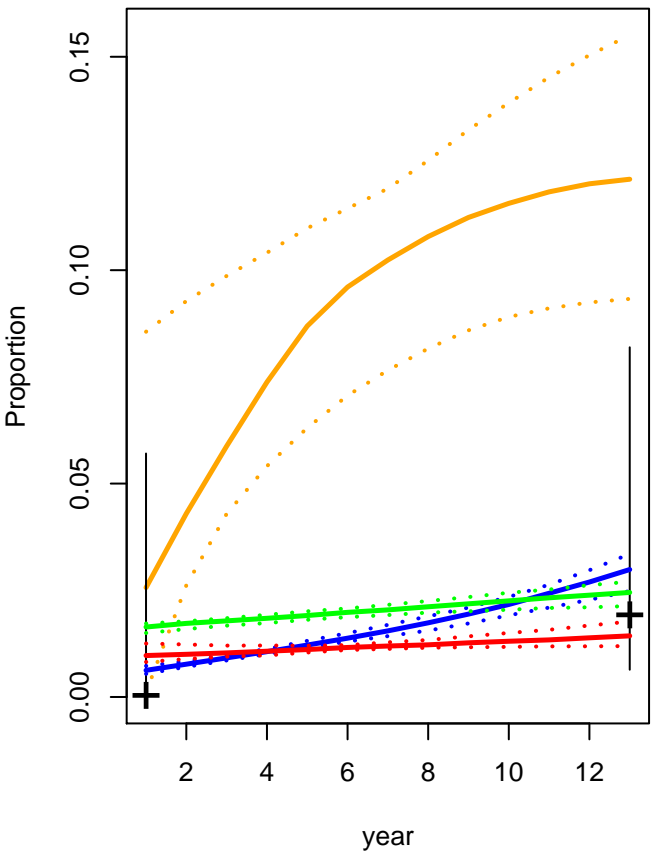

Moderate Infection

Dead

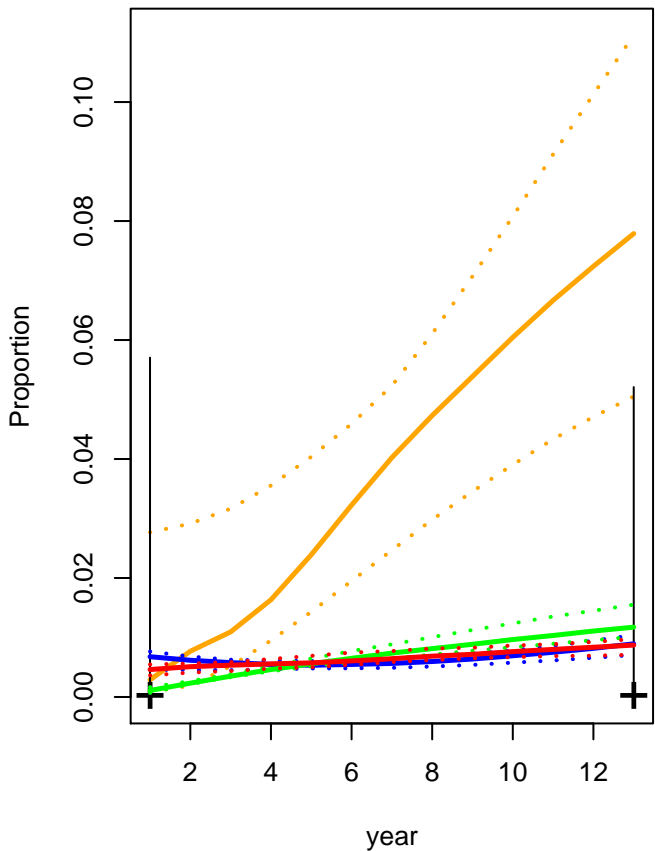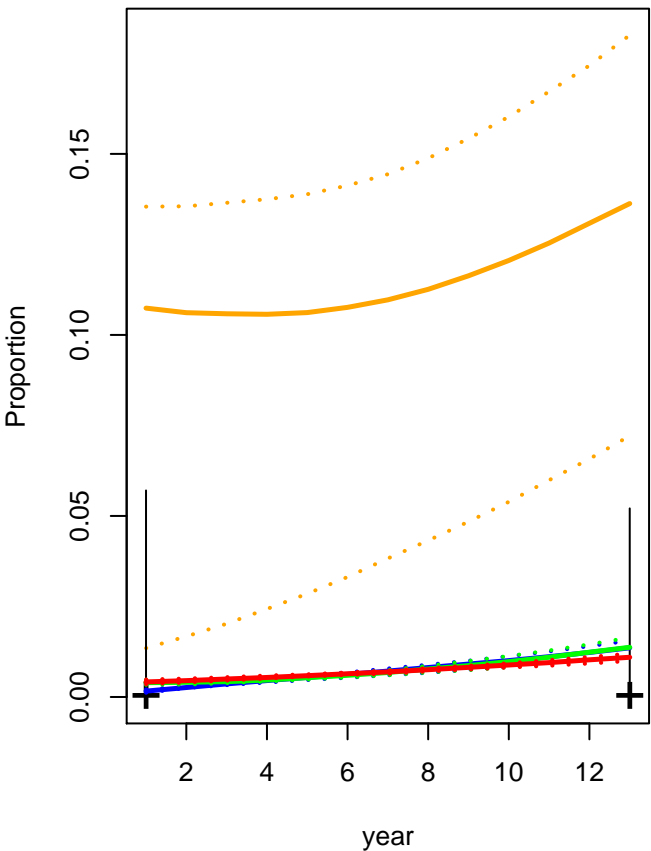

Uninfected

Site 22

Slight Infection

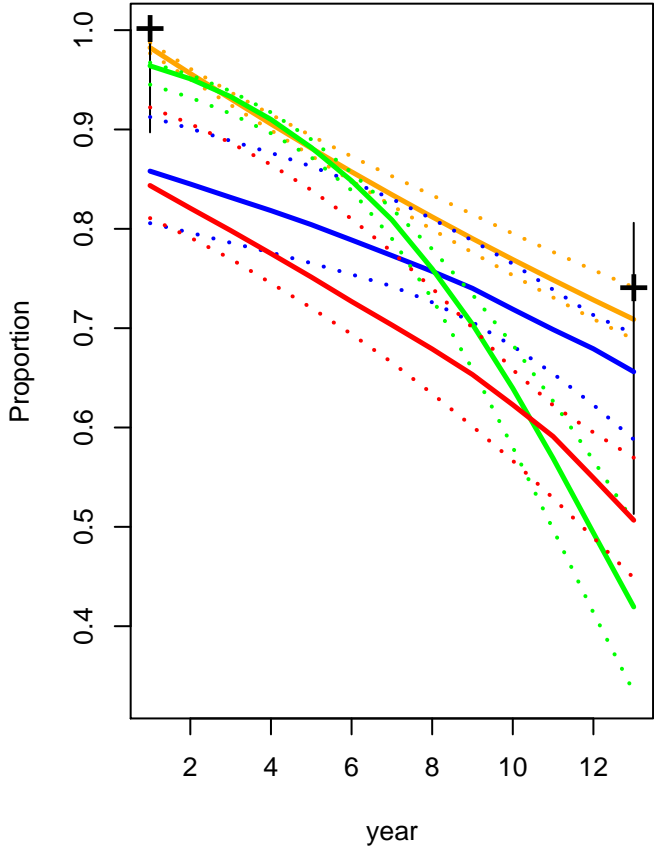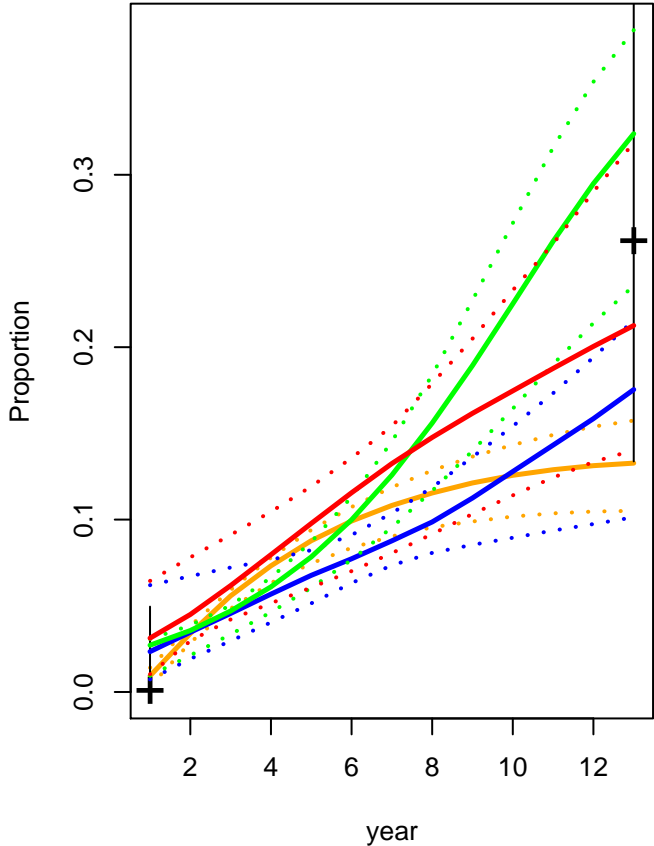

Moderate Infection

Dead

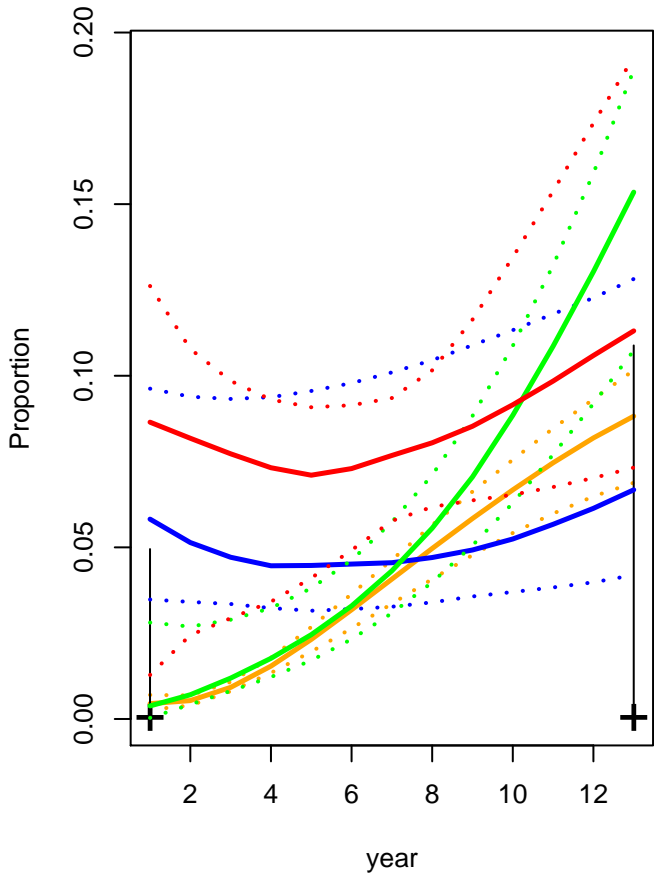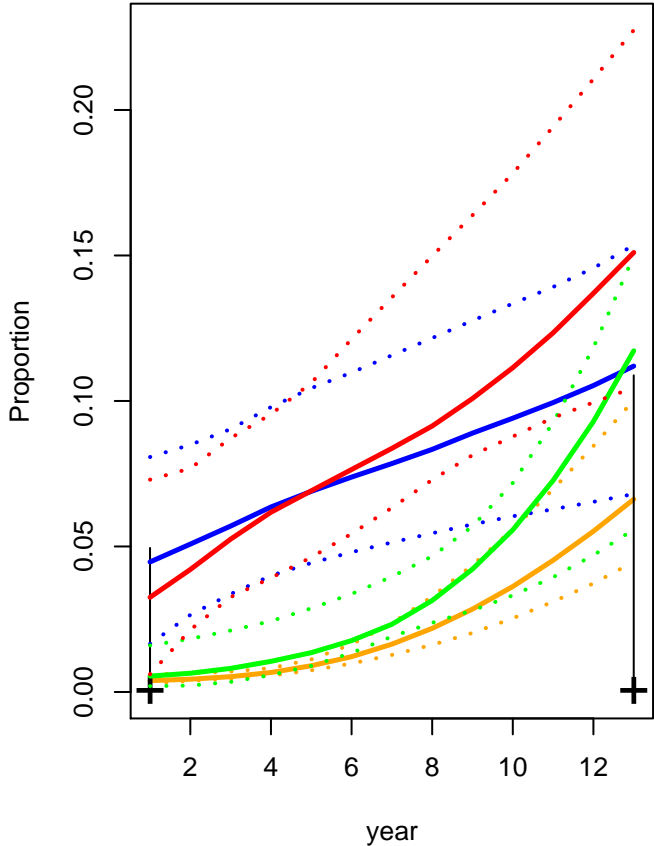



Uninfected

Site 23

Slight Infection

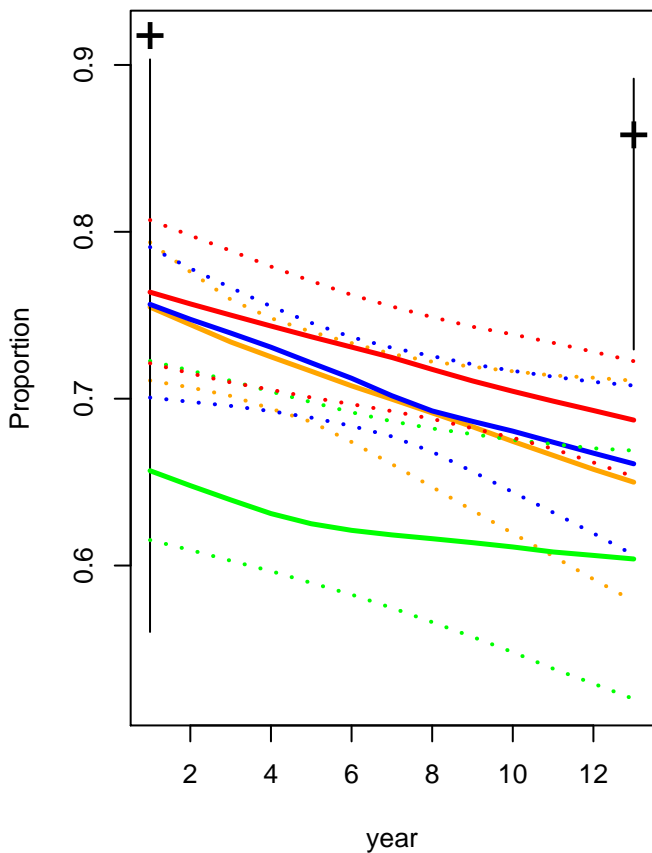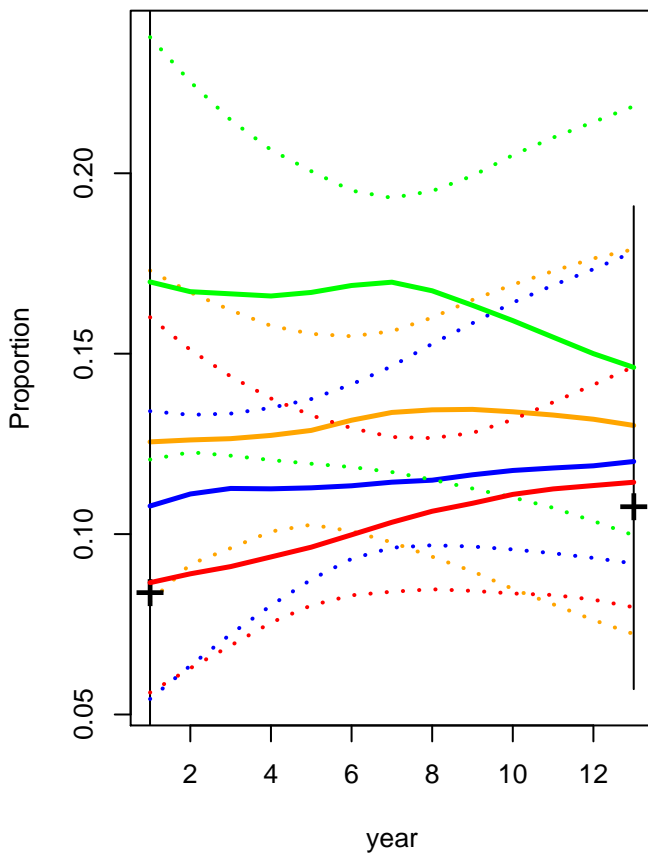

Moderate Infection

Dead

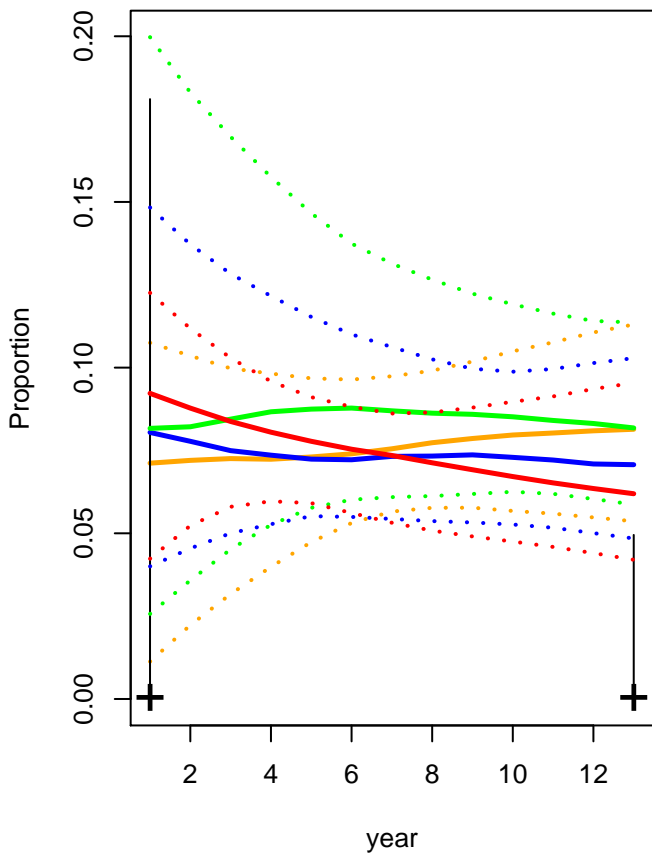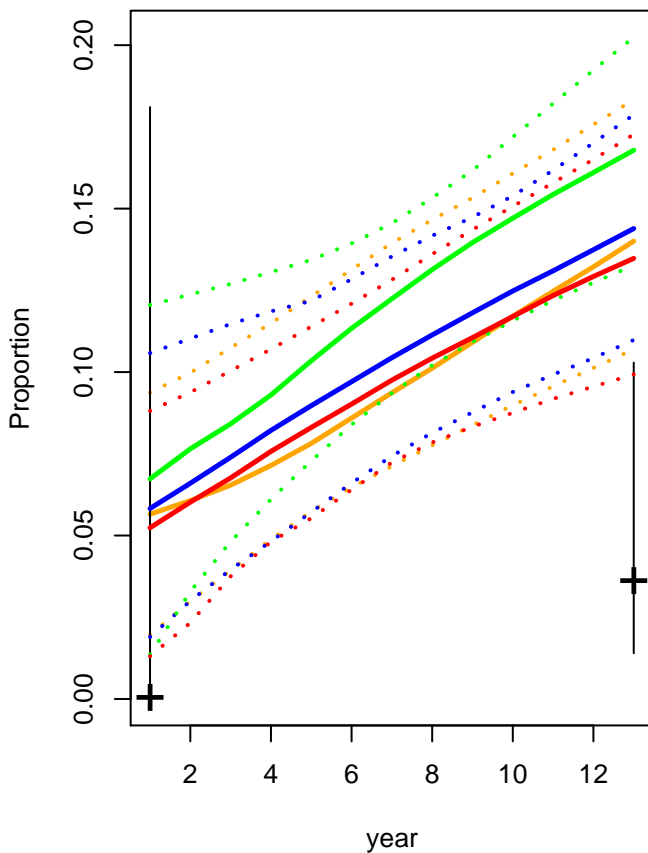

Uninfected

Site 24

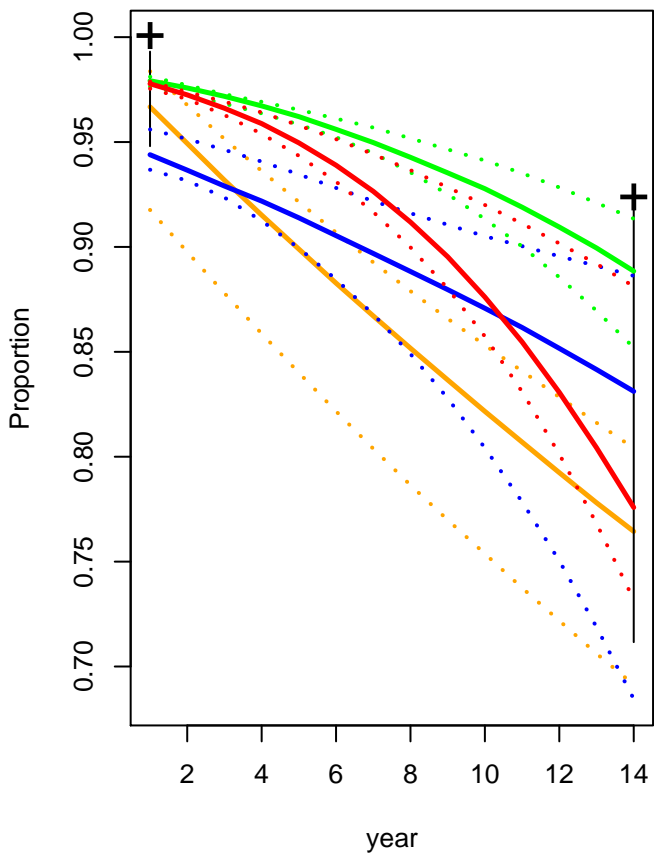

Slight Infection

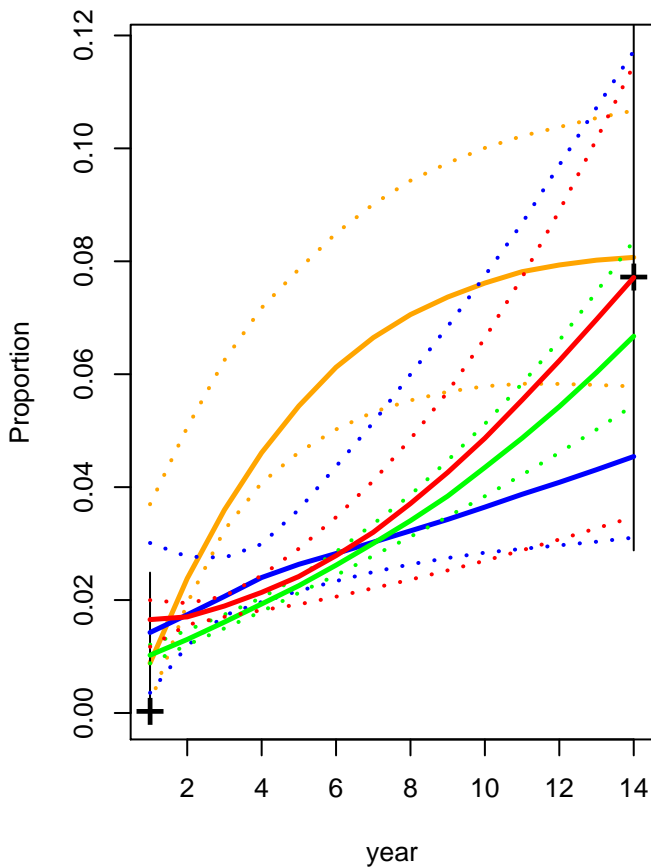

Moderate Infection

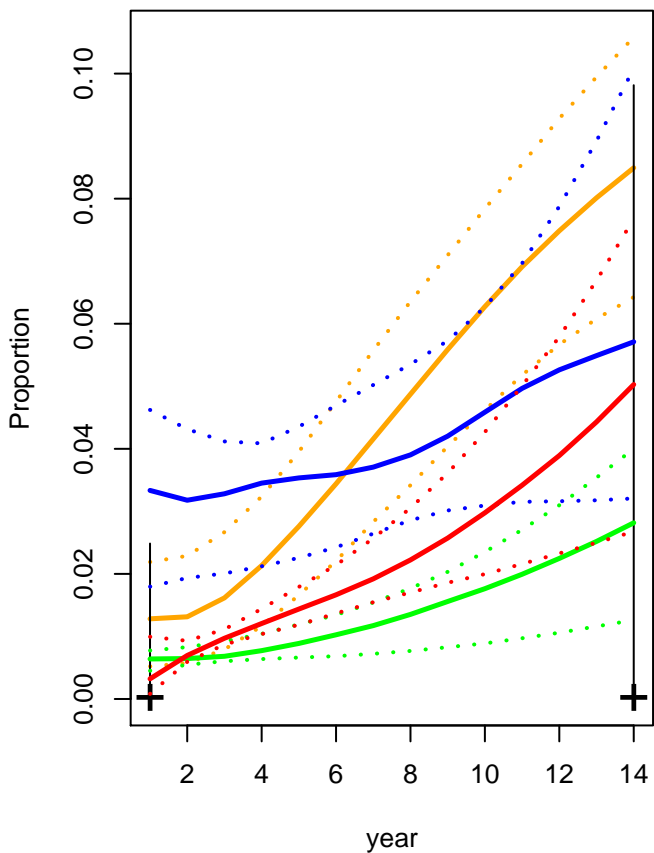

Dead

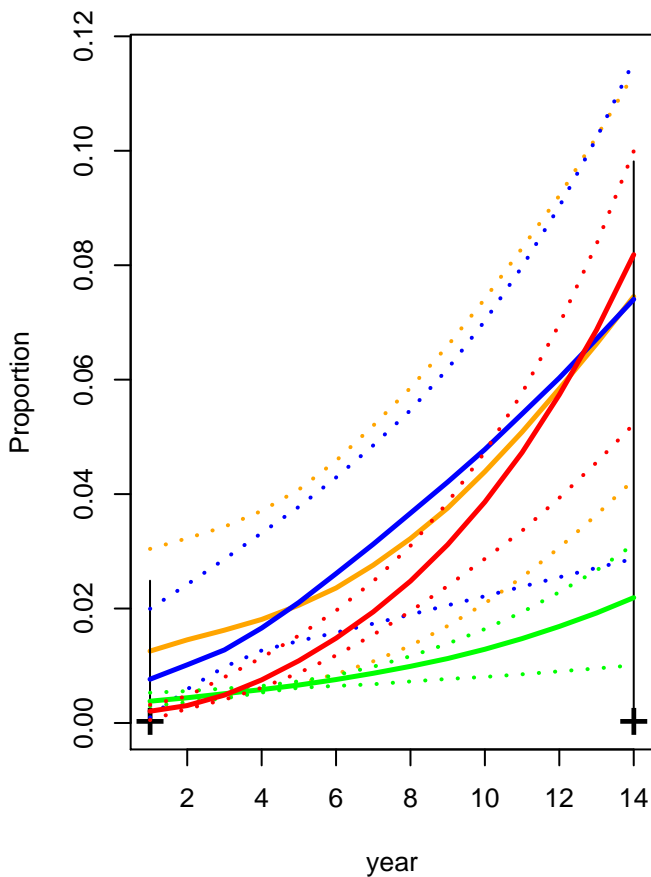

Uninfected

Site 25

Slight Infection

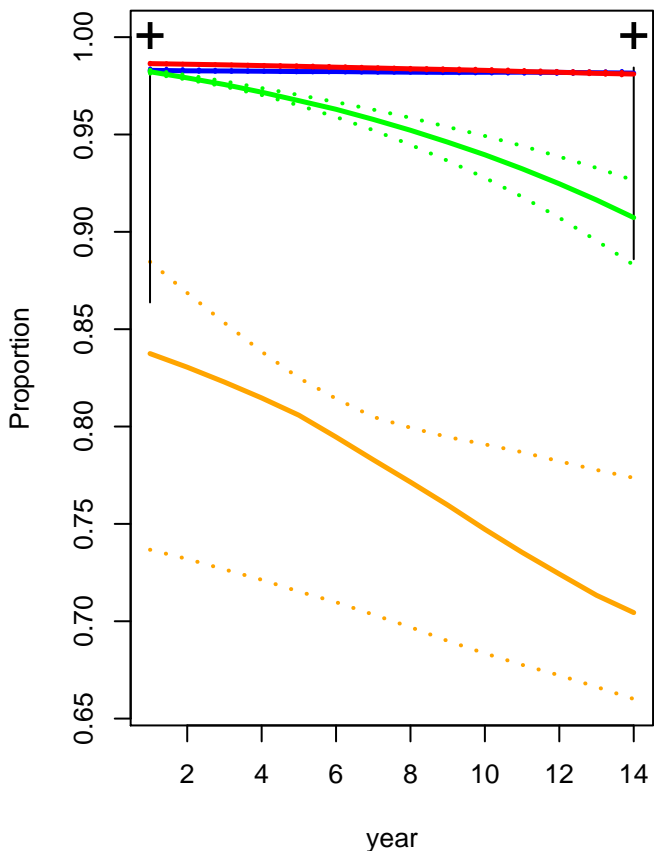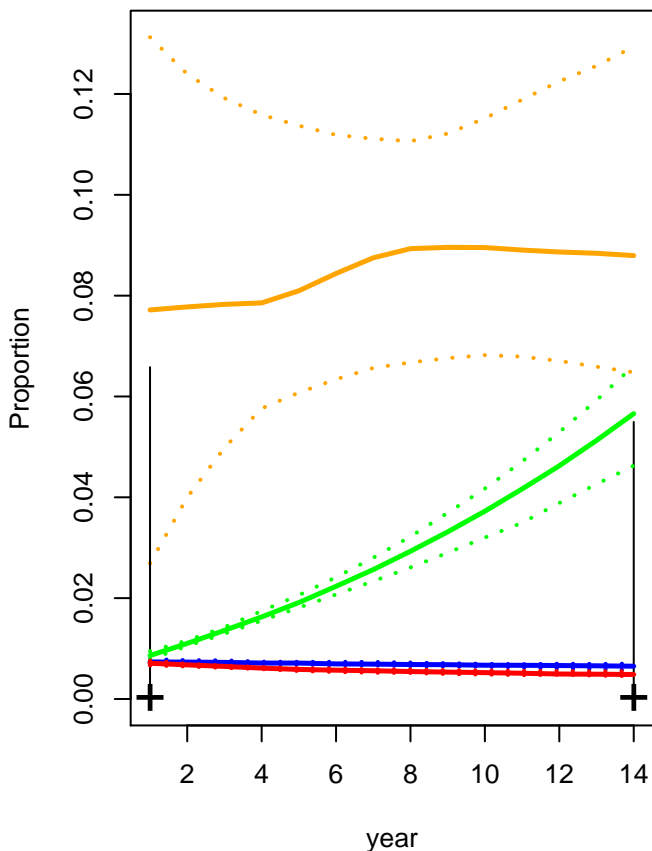

Moderate Infection

Dead

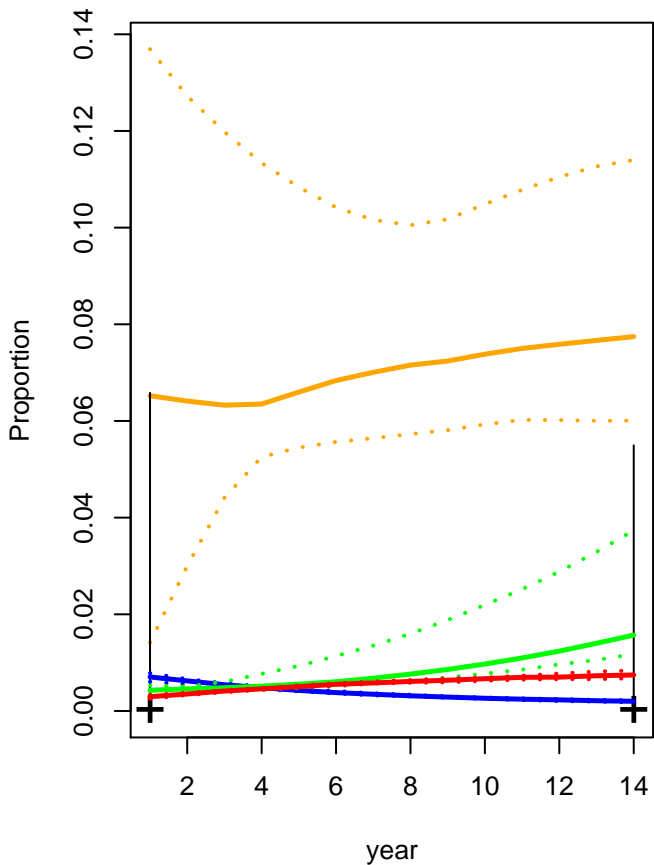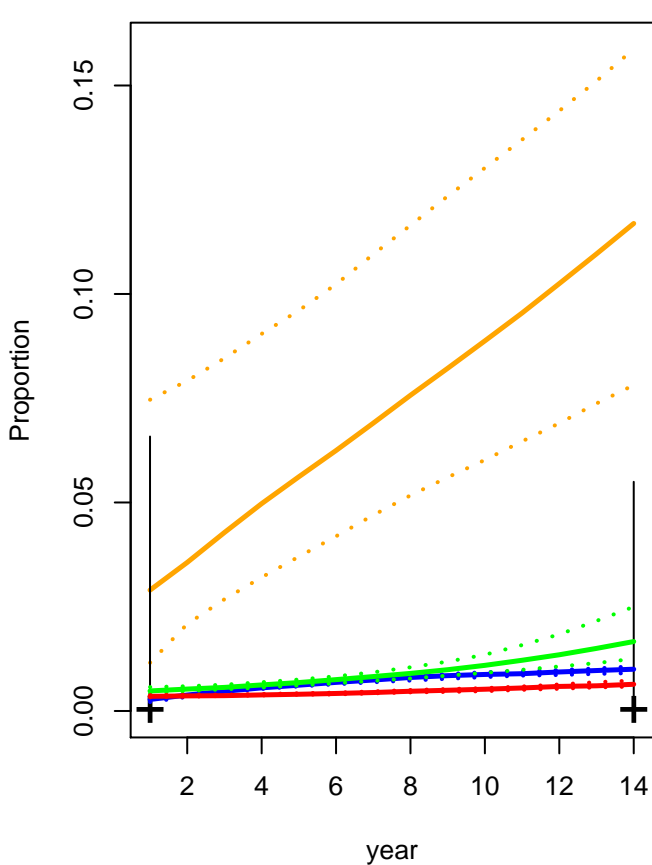

Uninfected

Site 26

Slight Infection

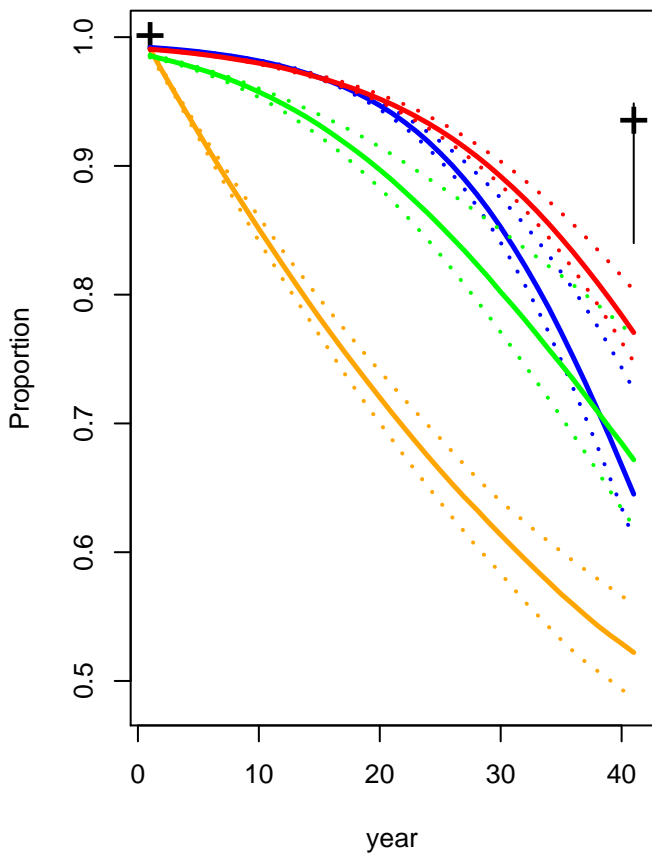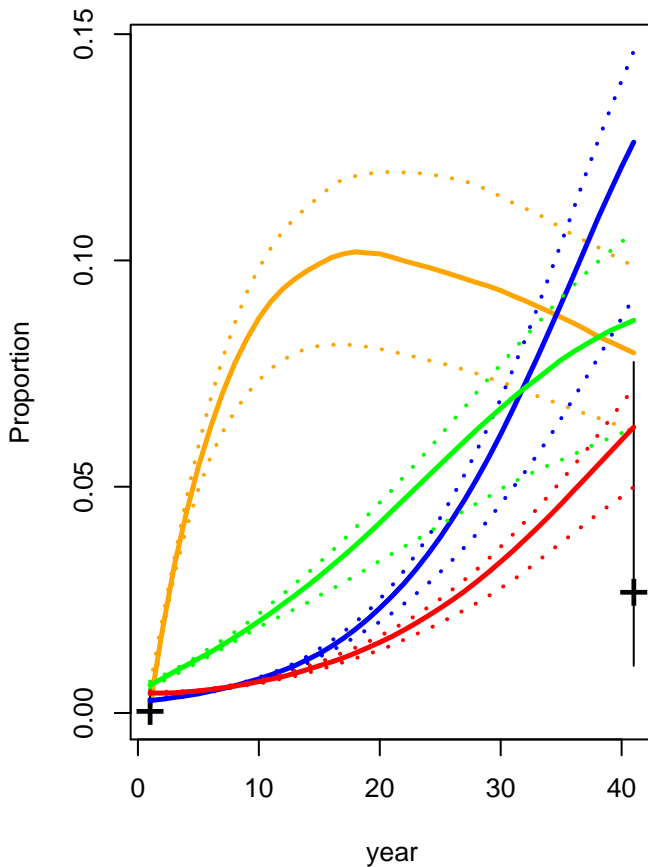

Moderate Infection

Dead

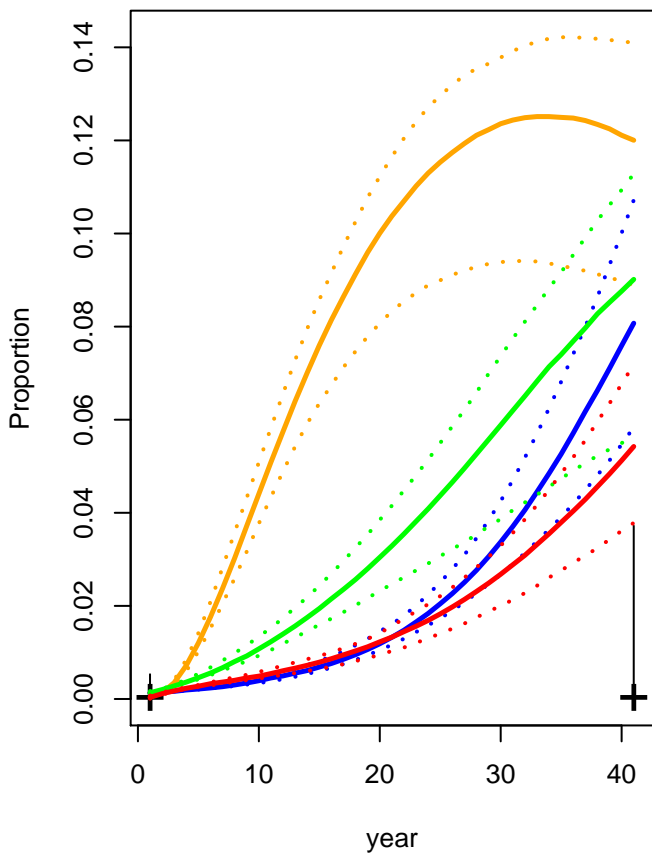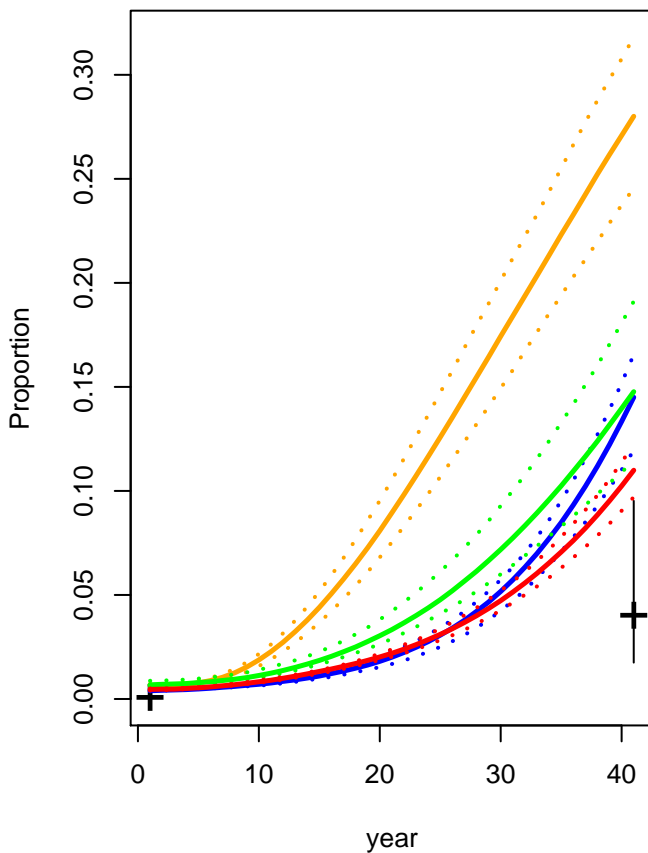

Uninfected

Site 27

Slight Infection

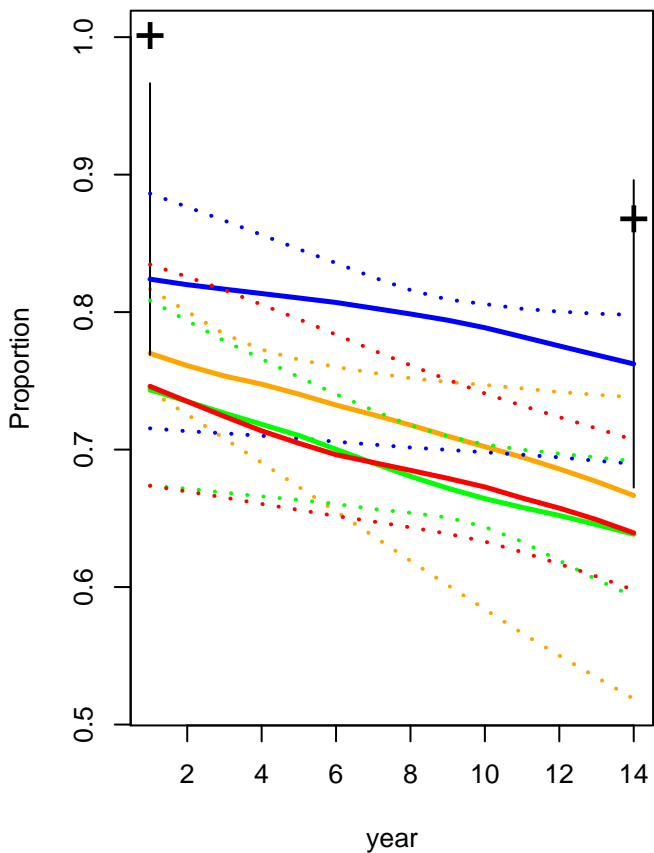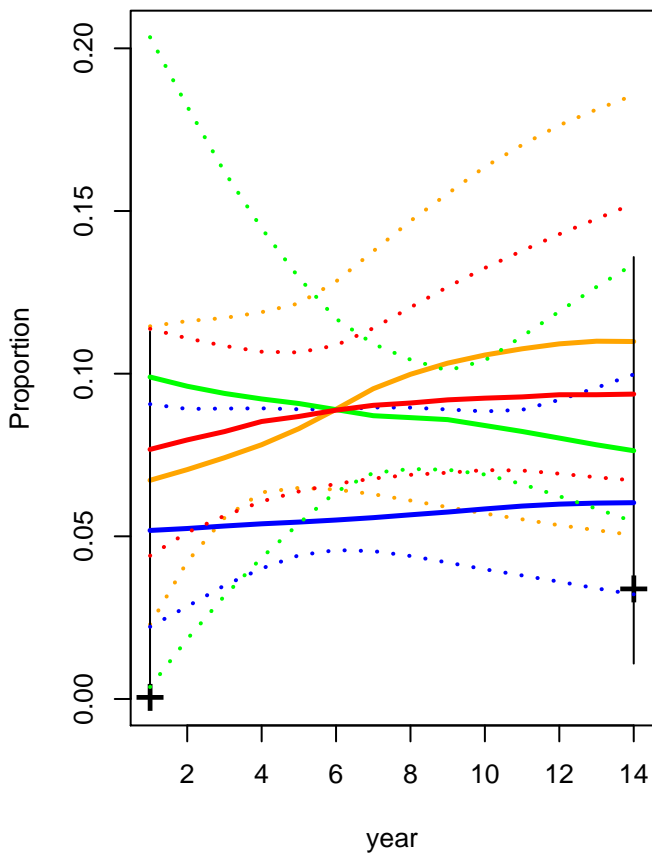

Moderate Infection

Dead

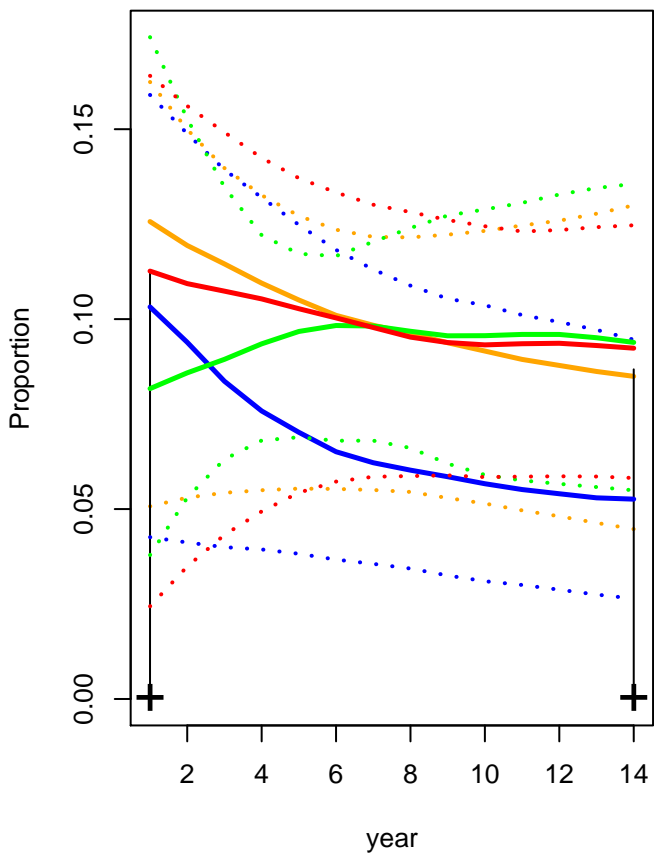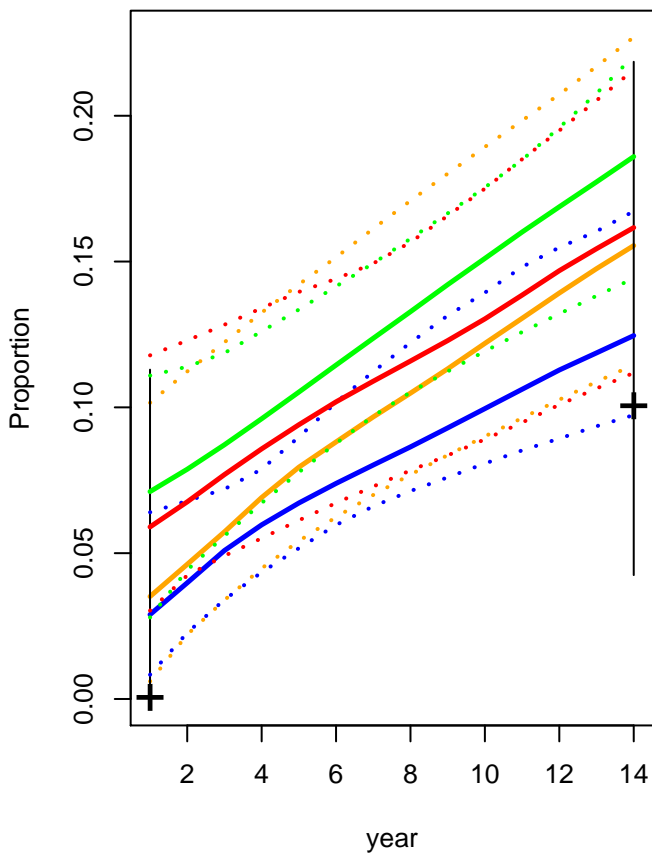

Uninfected

Site 28

Slight Infection

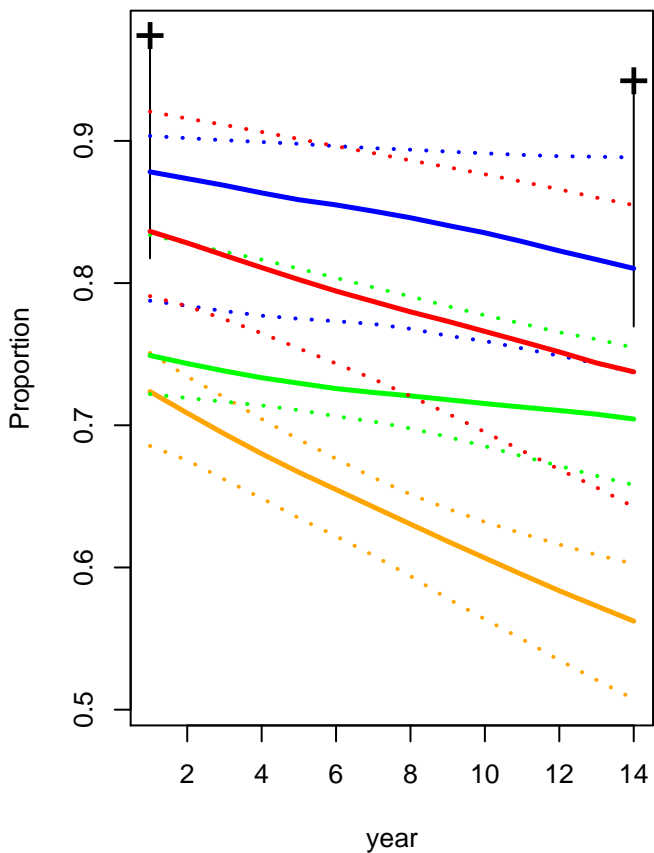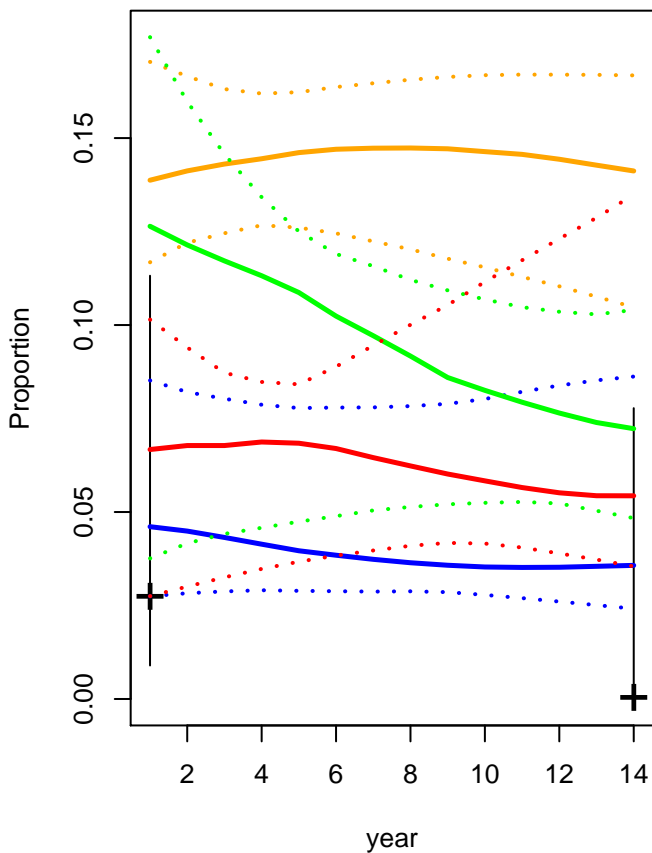

Moderate Infection

Dead

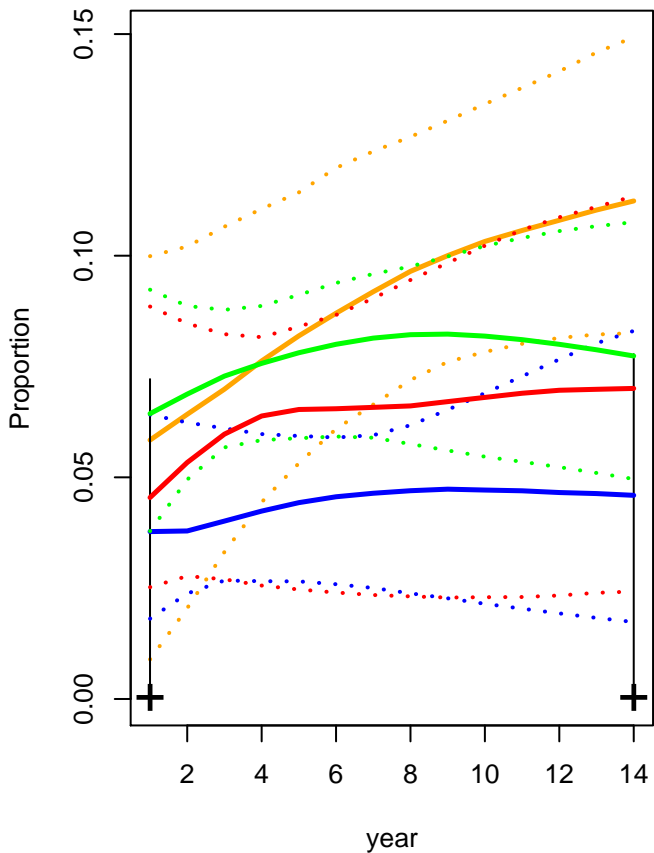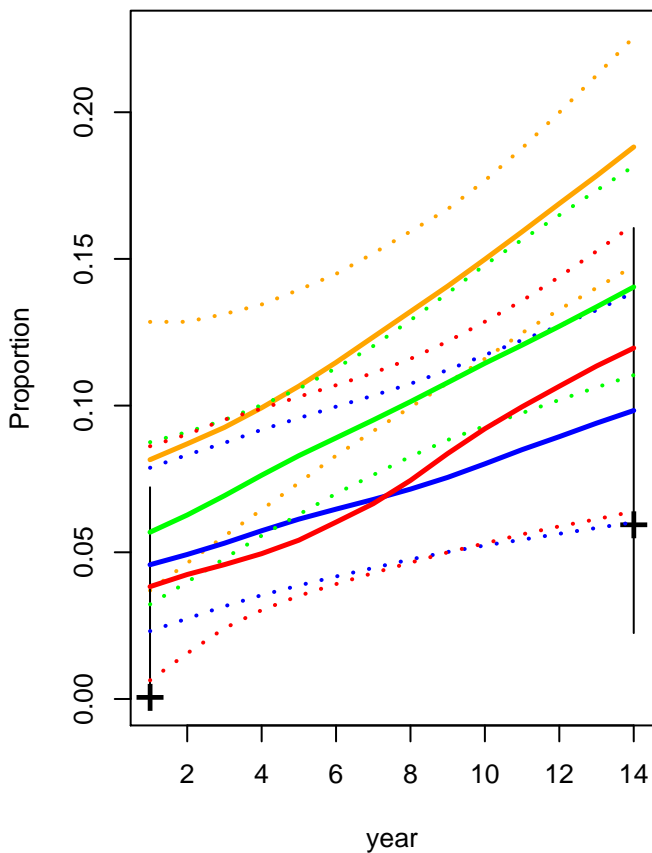

Uninfected

Site 29

Slight Infection

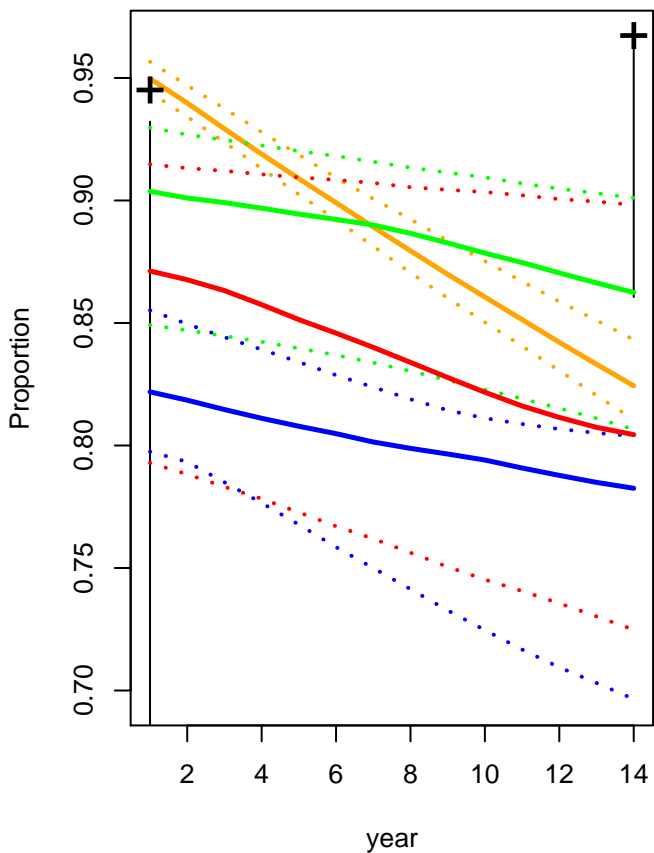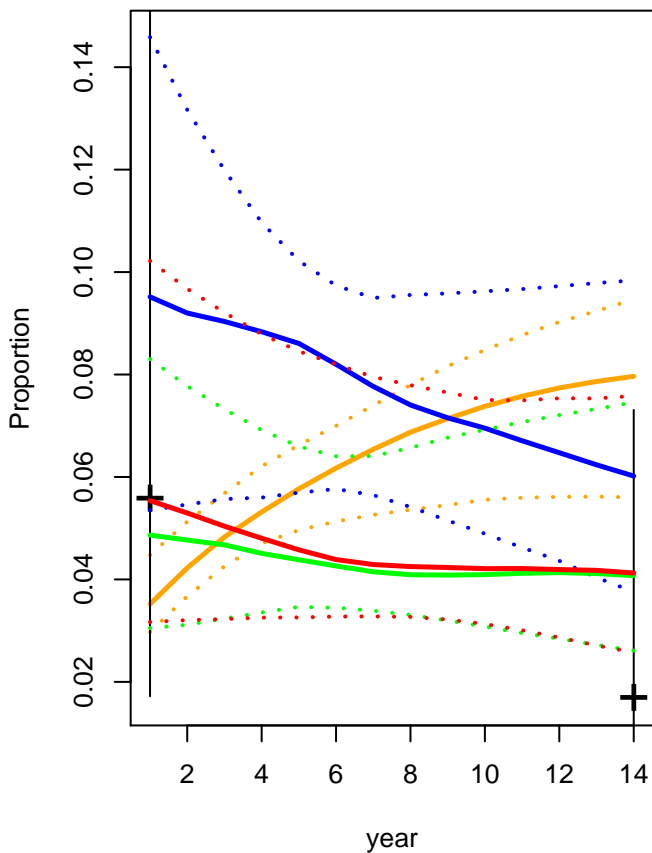

Moderate Infection

Dead

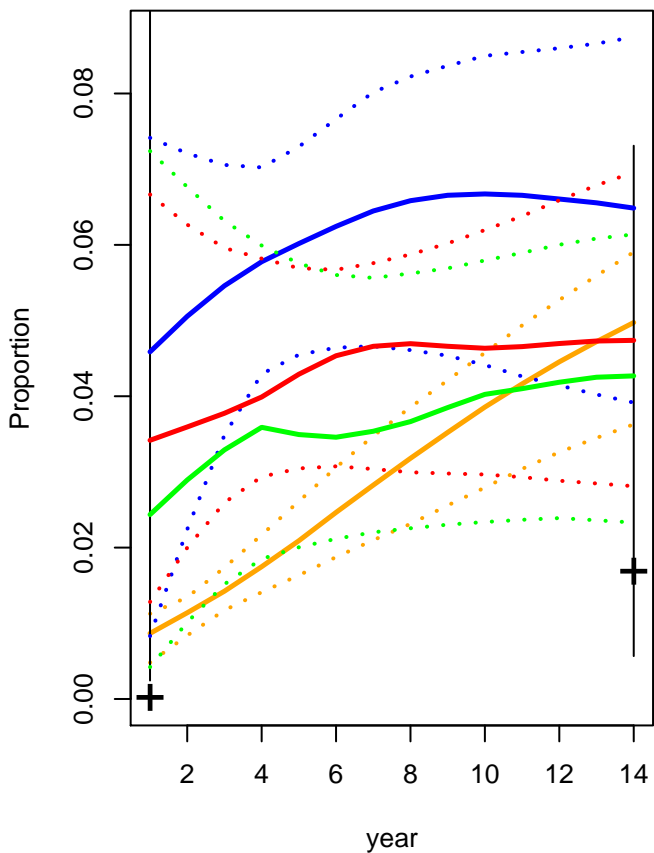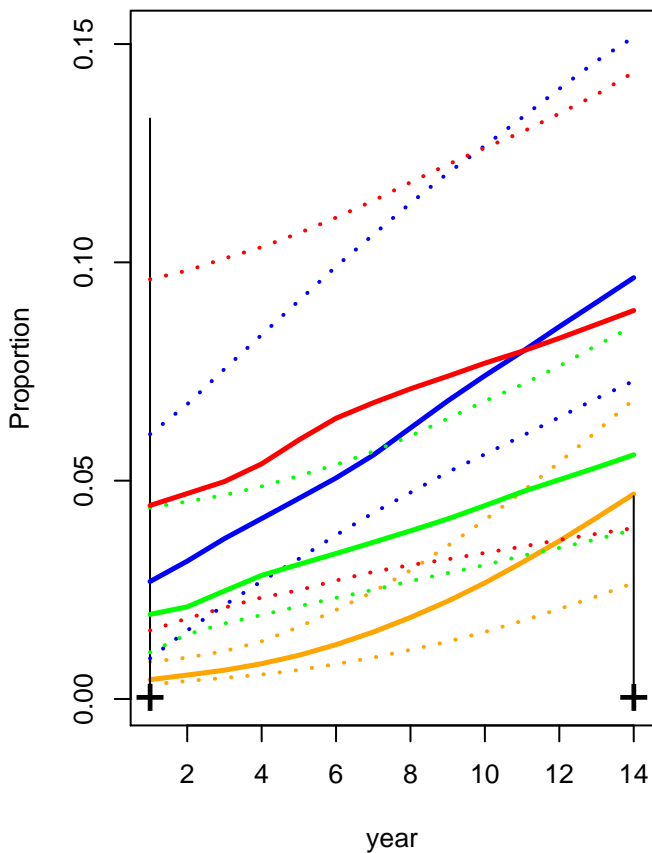

Uninfected

Site 30

Slight Infection

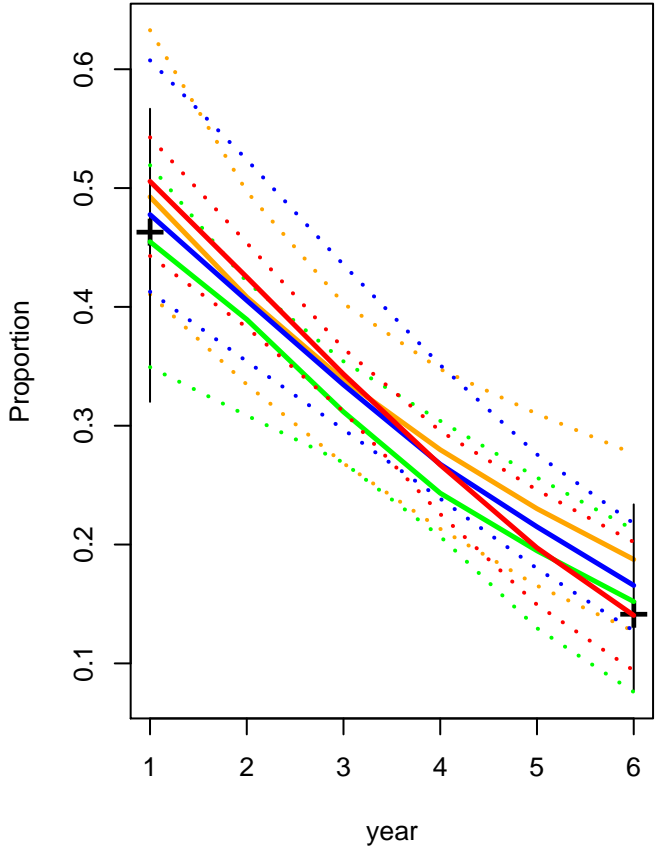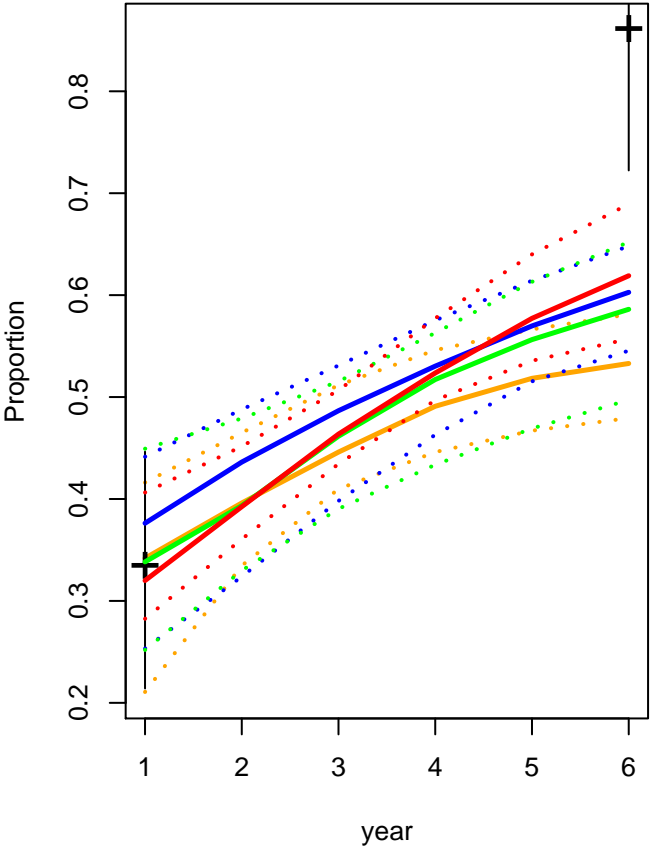

Moderate Infection

Dead

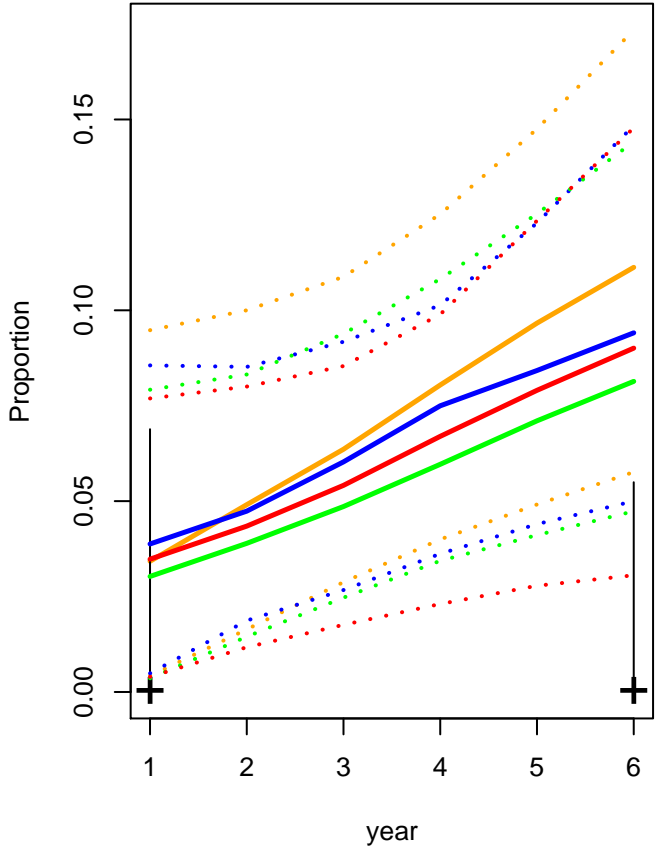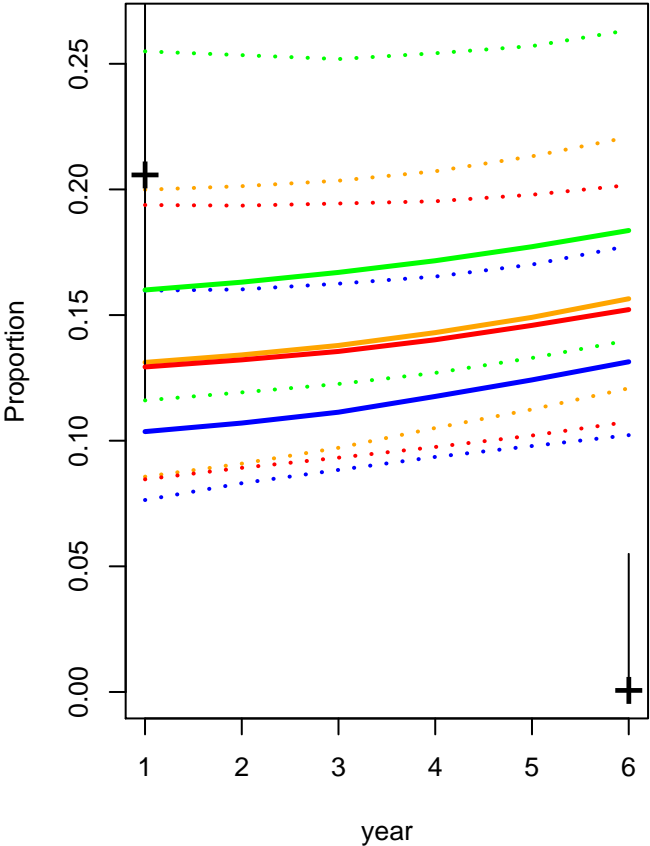



Uninfected

Site 31

Slight Infection

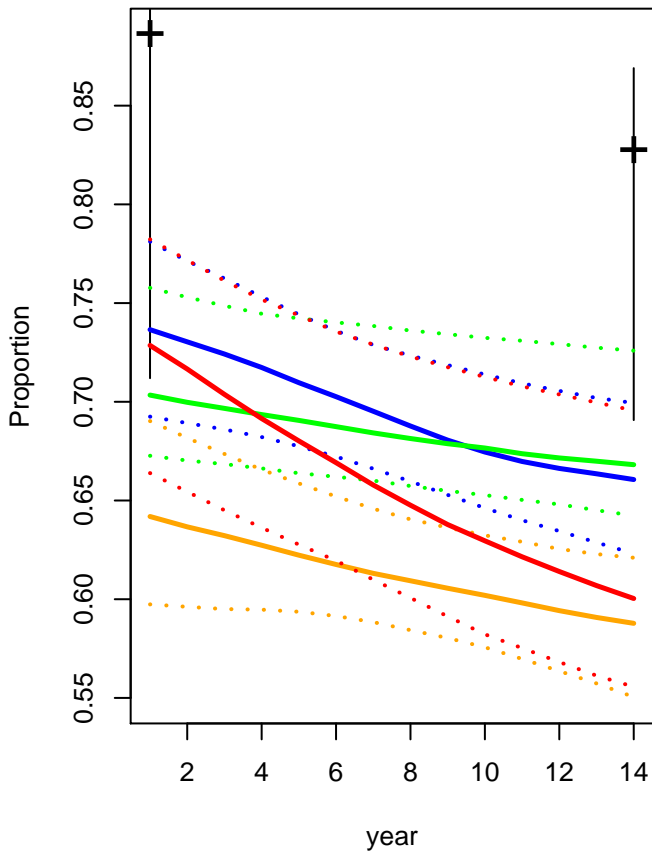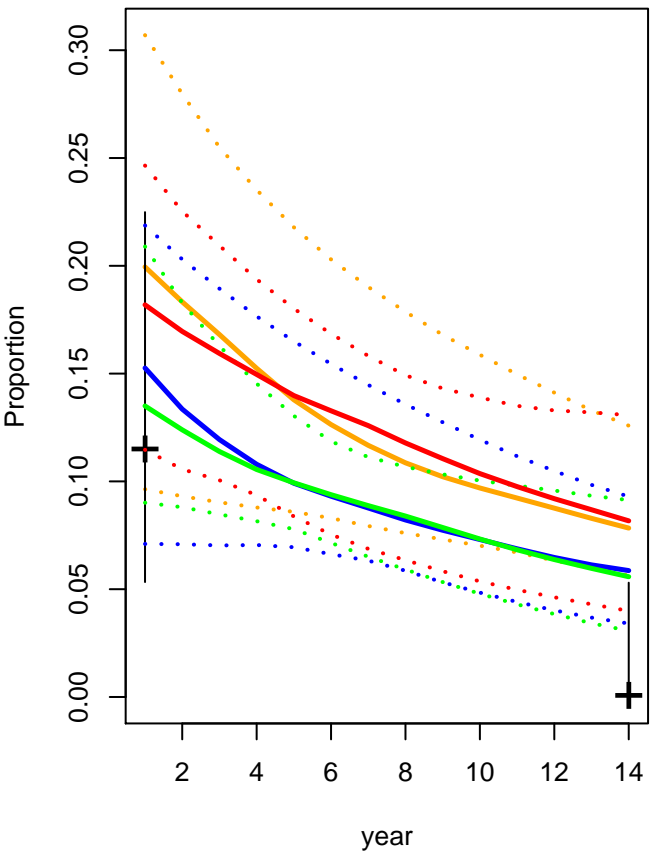

Moderate Infection

Dead

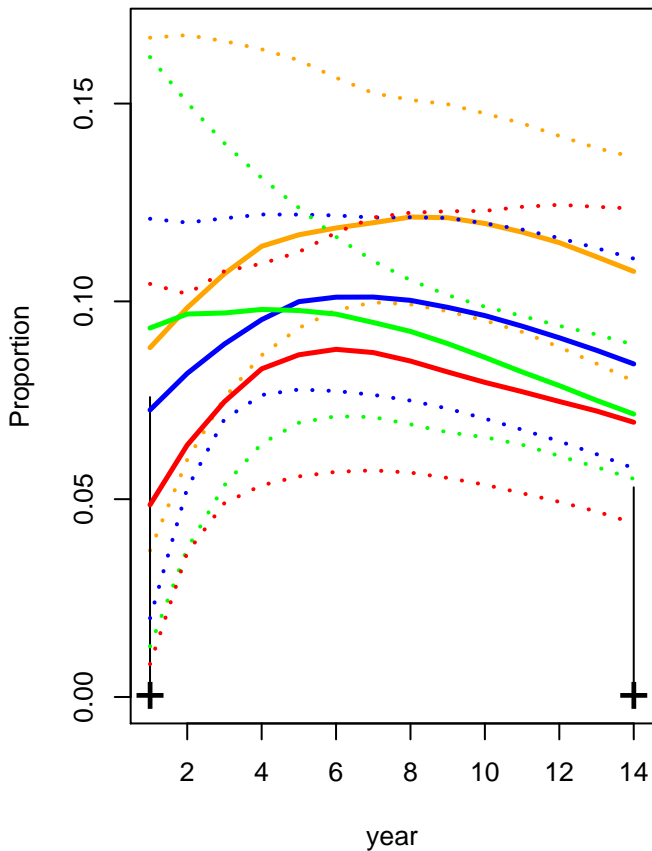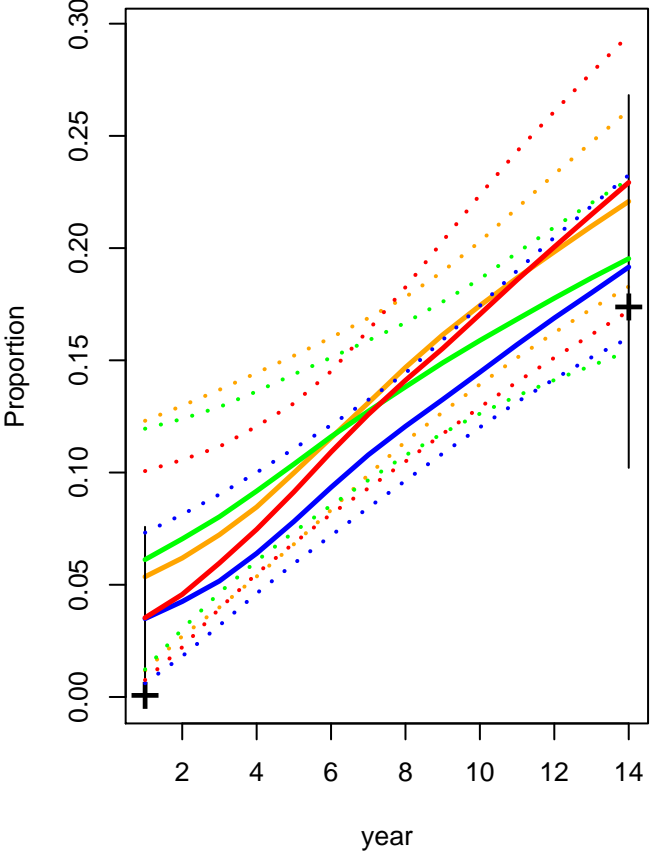

Uninfected

Site 32

Slight Infection

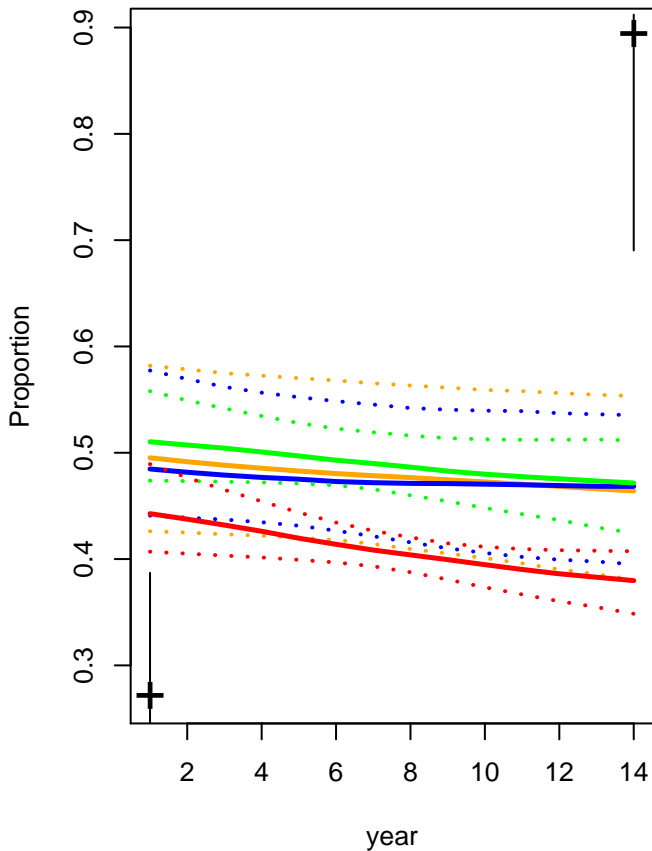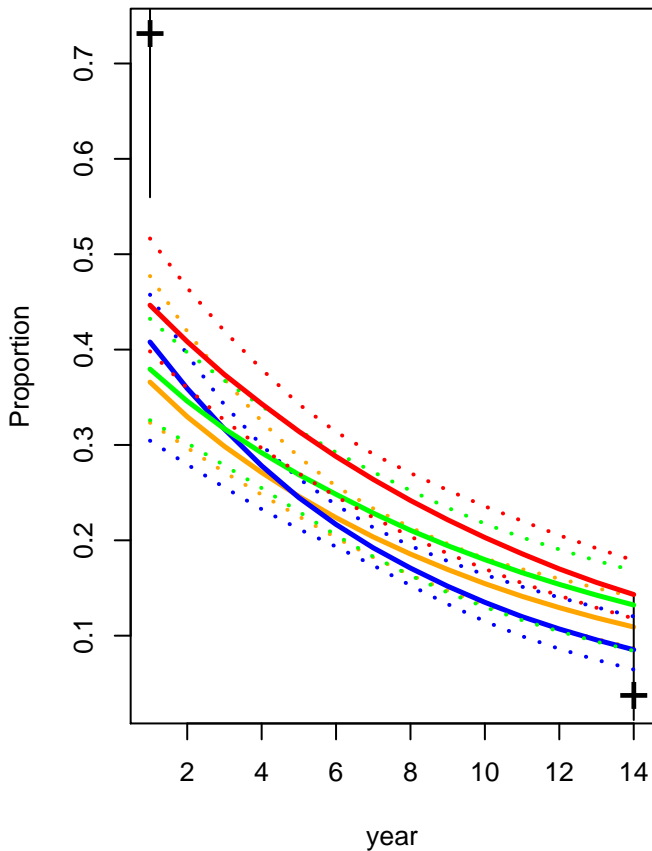

Moderate Infection

Dead

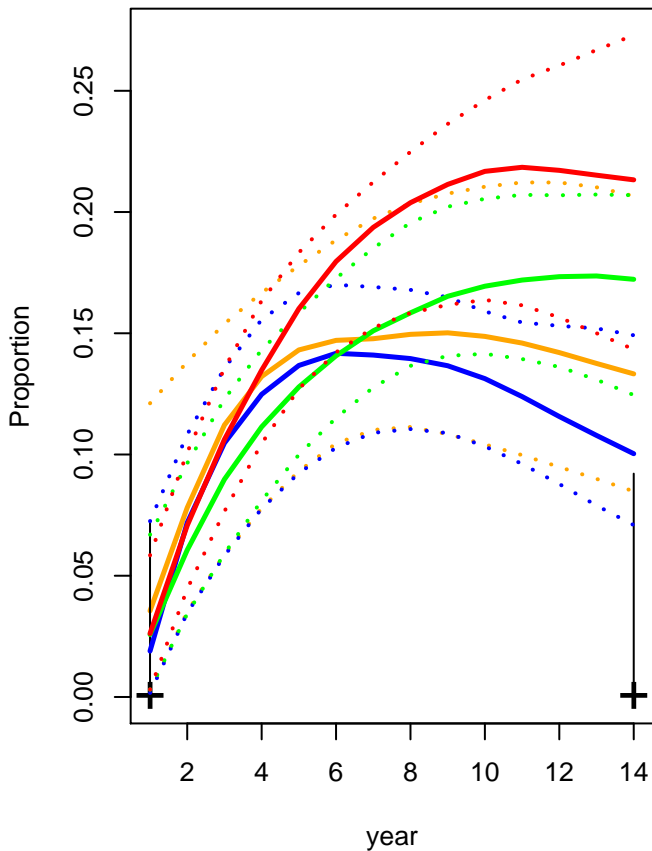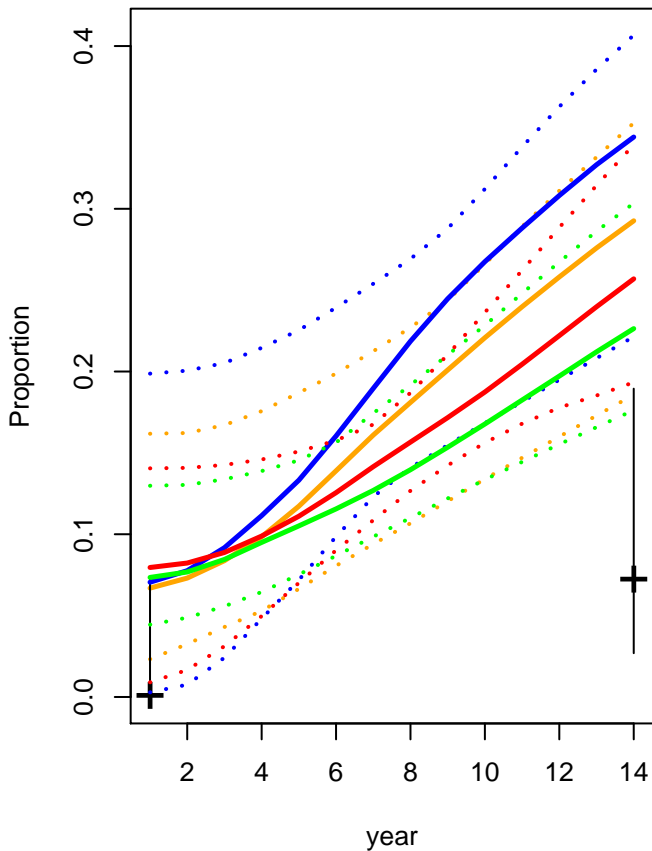

Uninfected

Site 33

Slight Infection

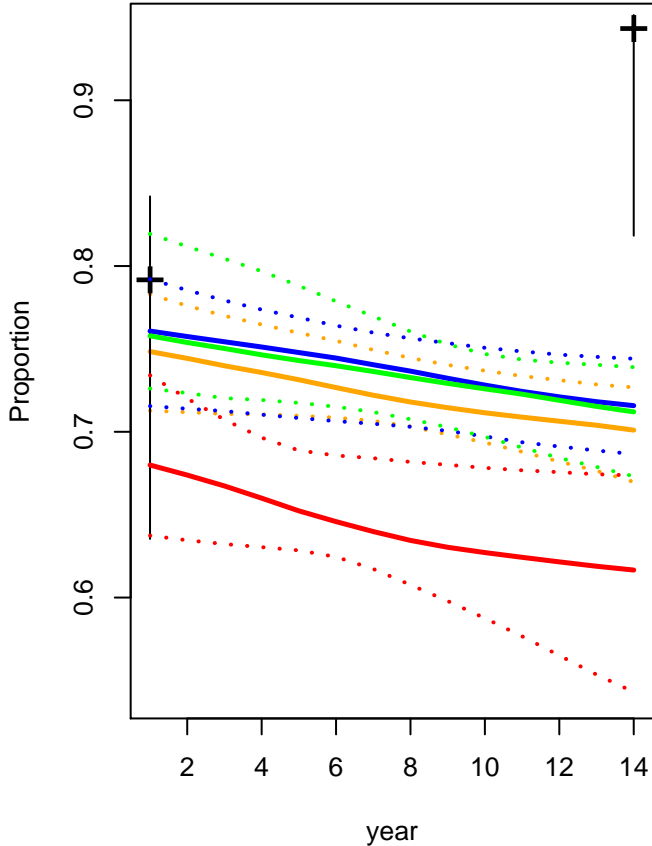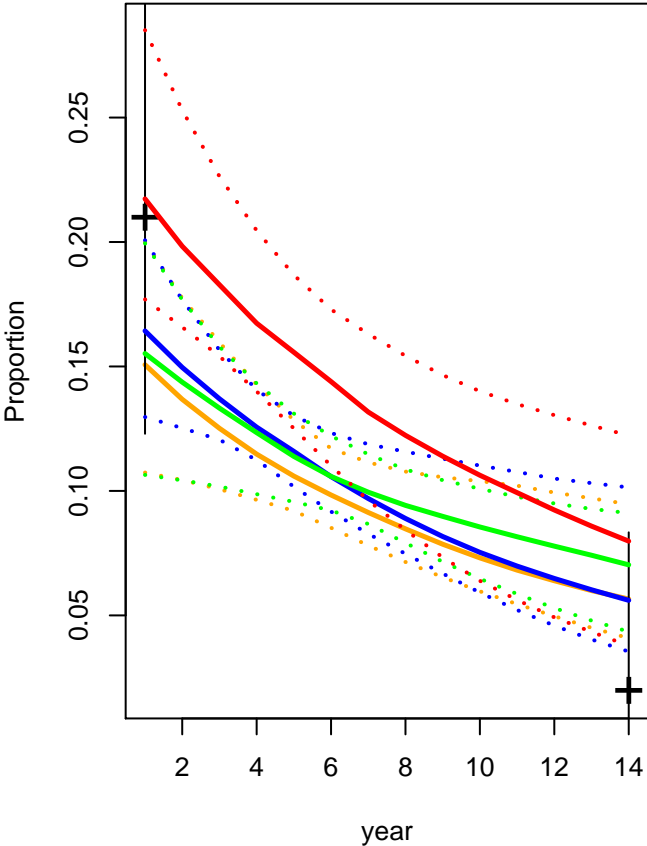

Moderate Infection

Dead

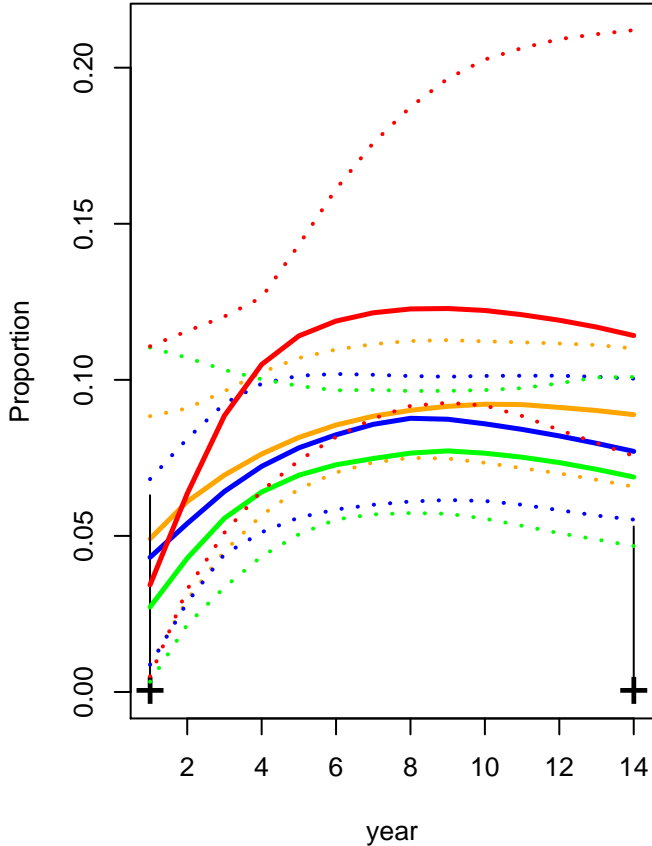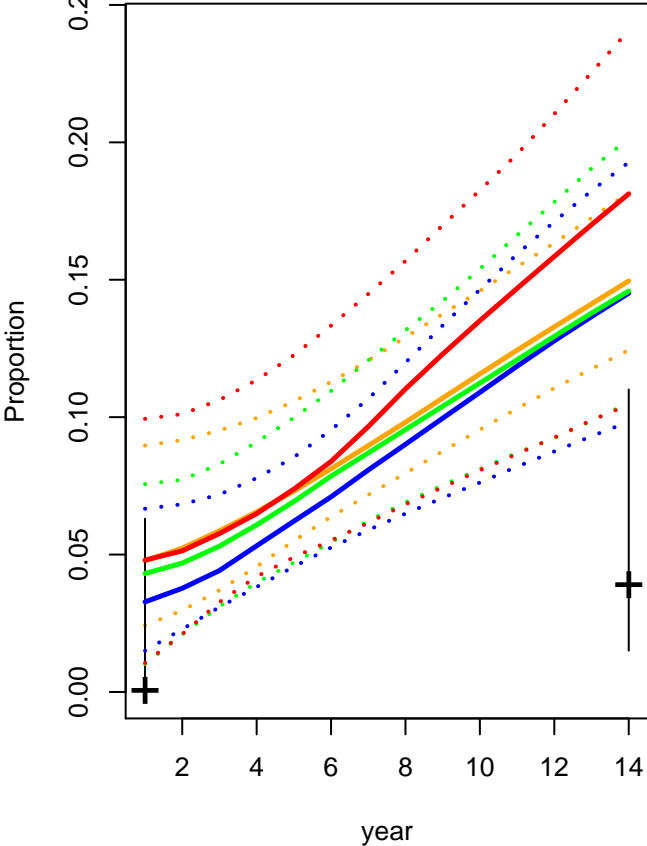

Uninfected

Site 34

Slight Infection

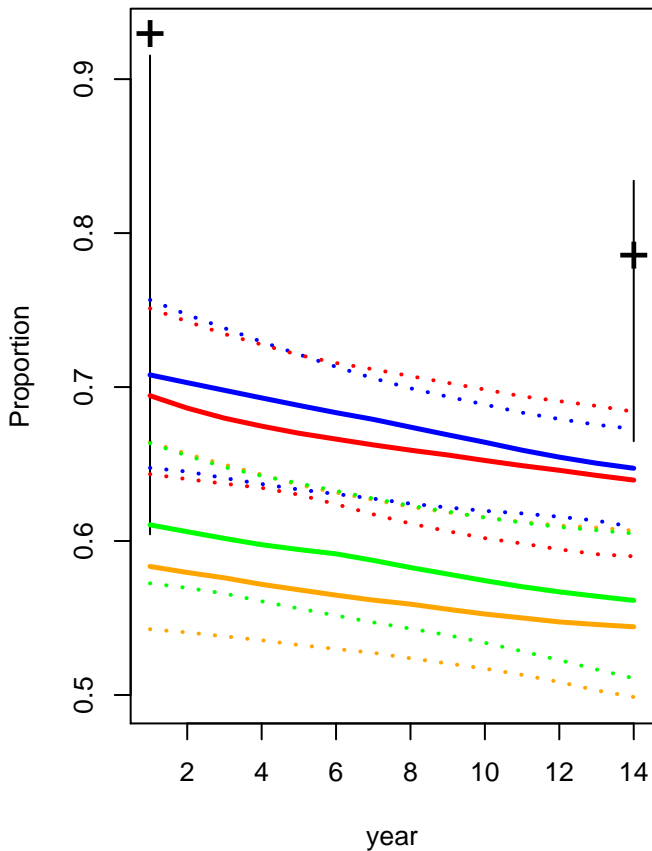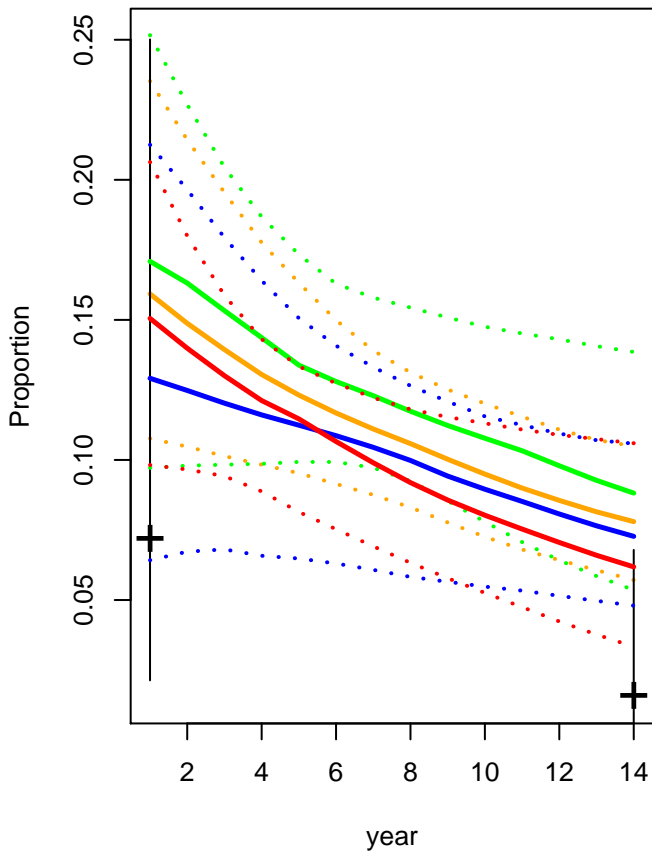

Moderate Infection

Dead

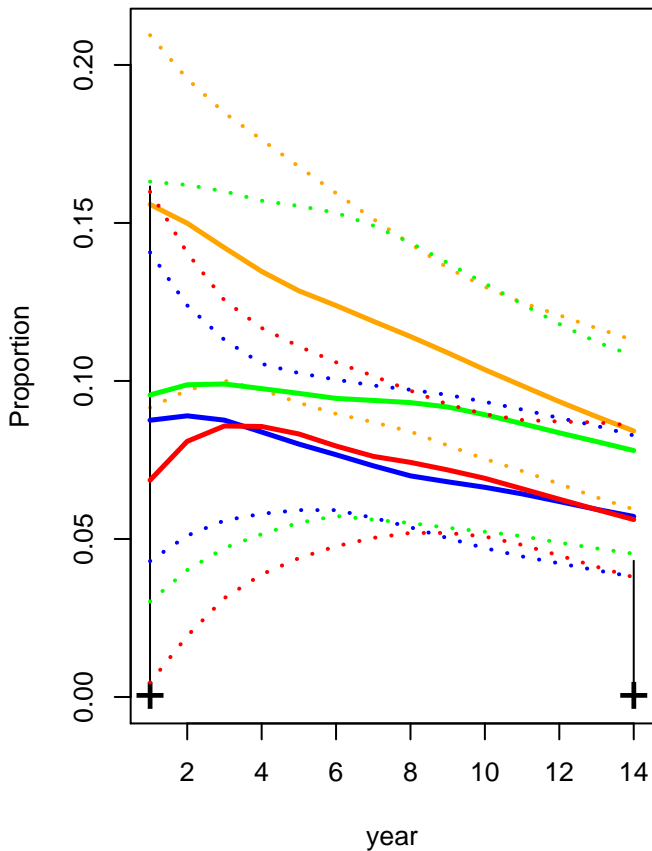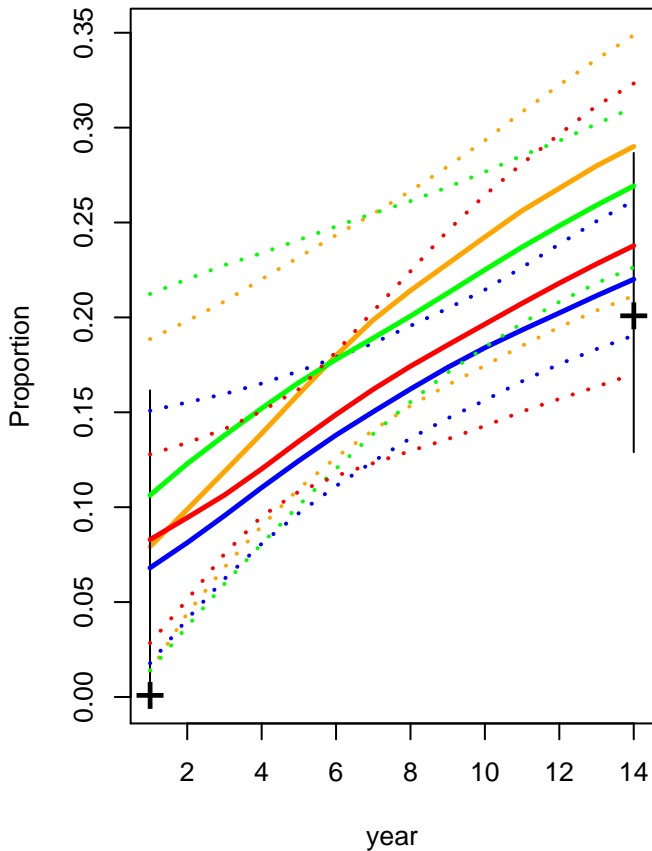

Uninfected

Site 35

Slight Infection

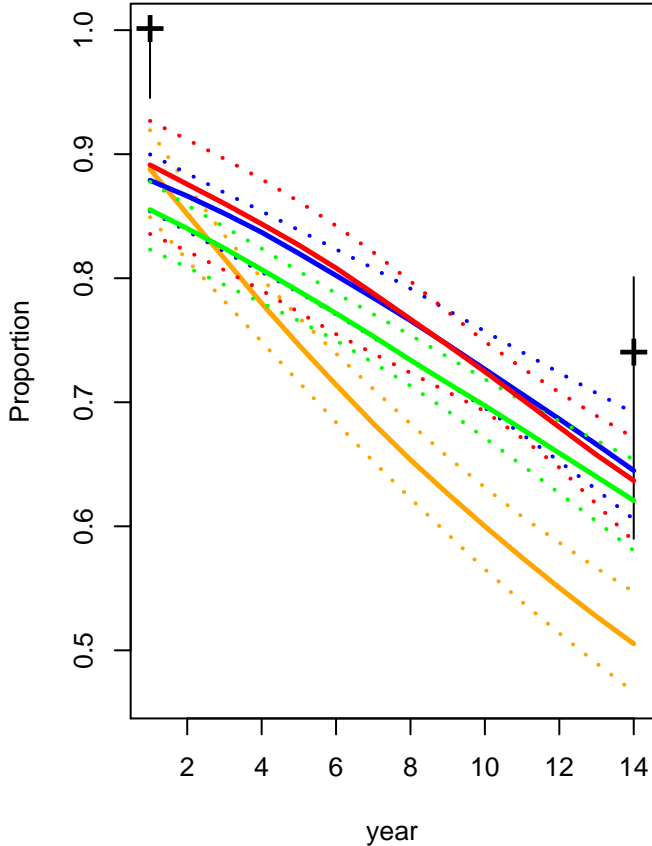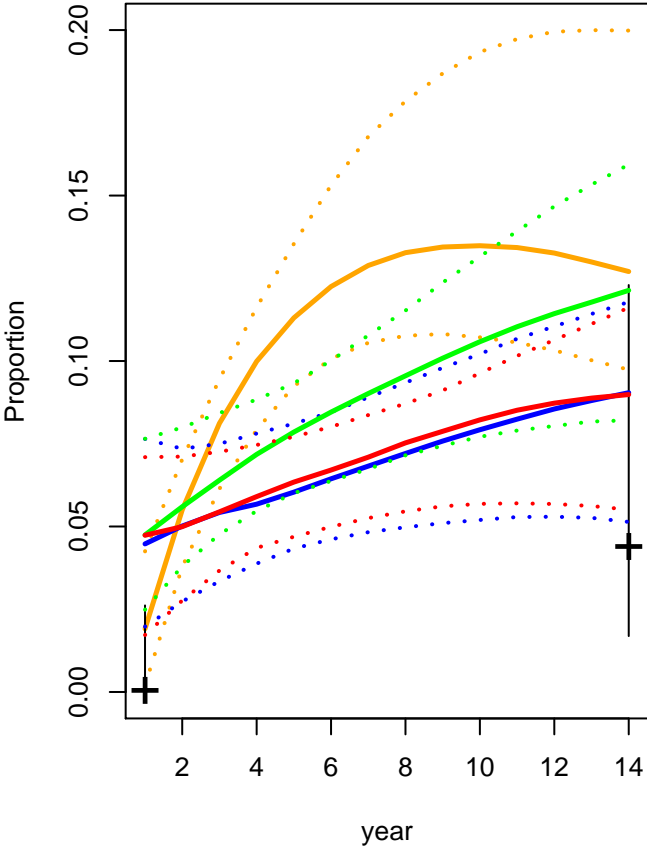

Moderate Infection

Dead

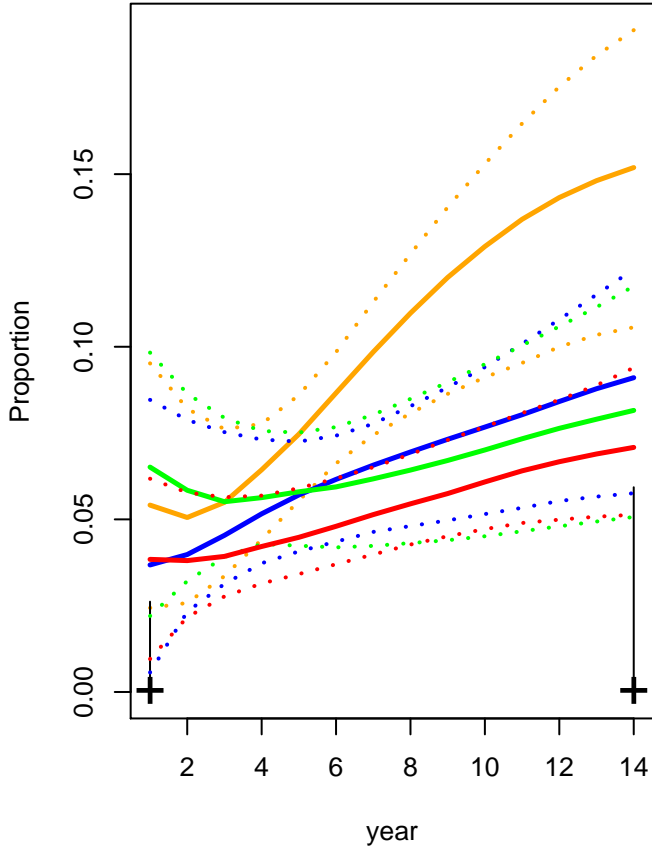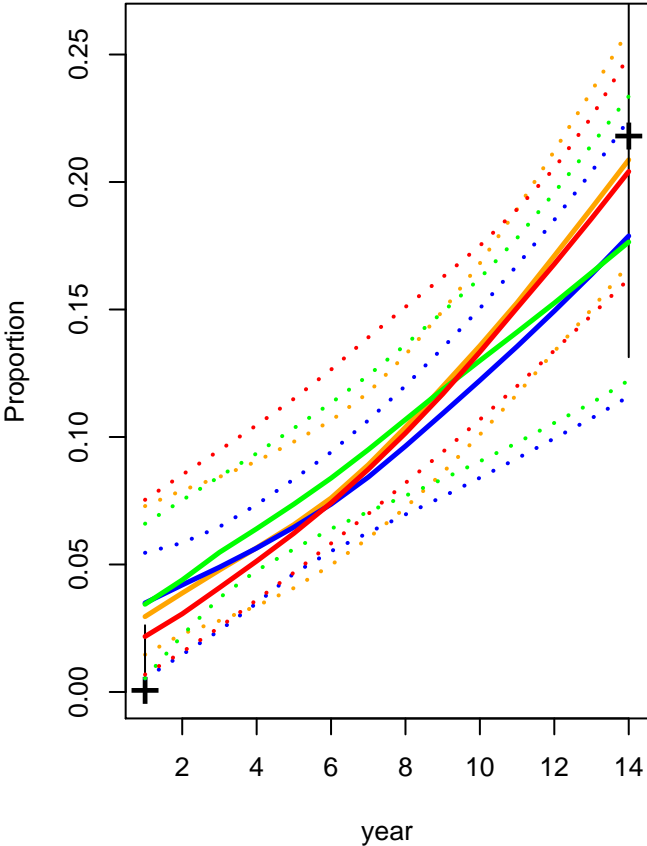

Uninfected

Site 36

Slight Infection

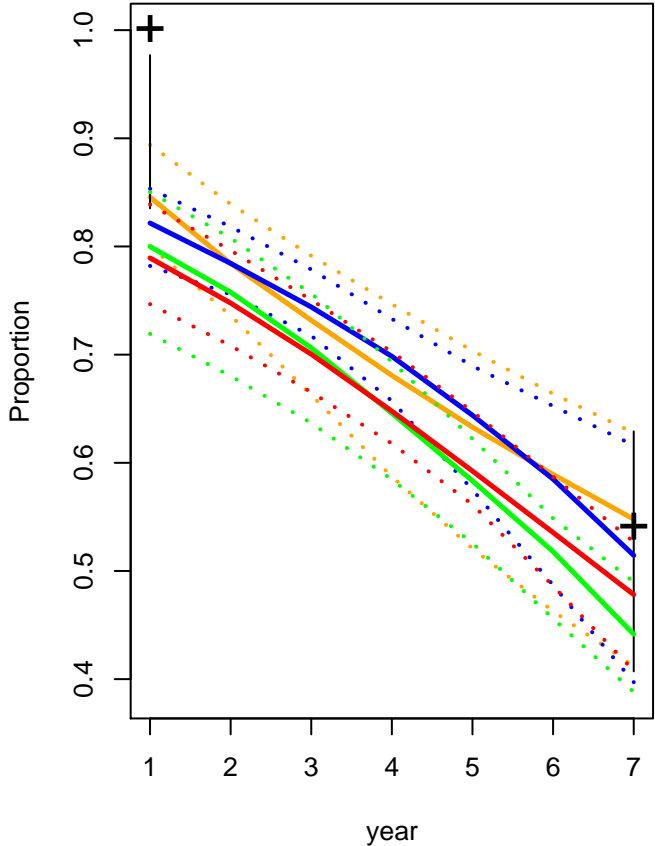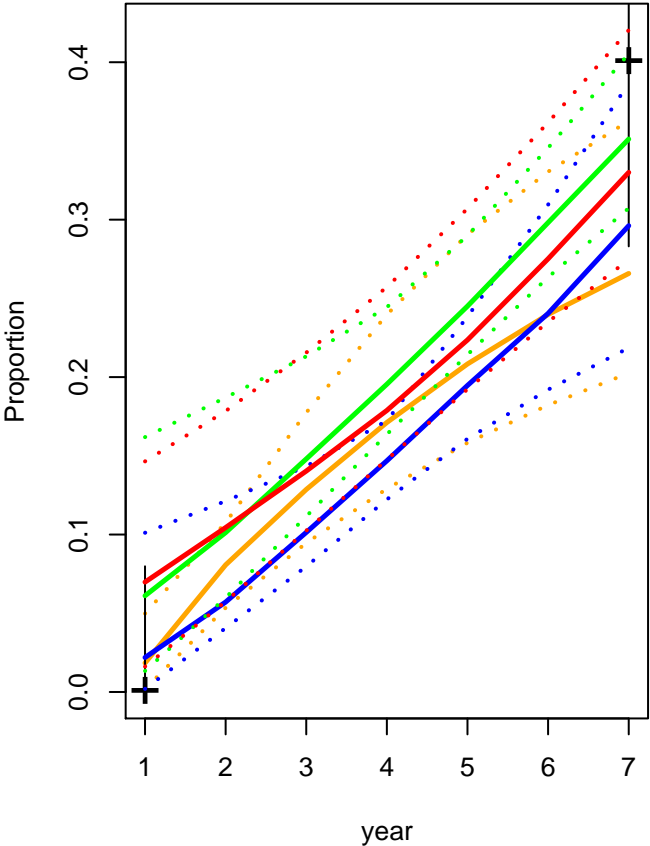

Moderate Infection

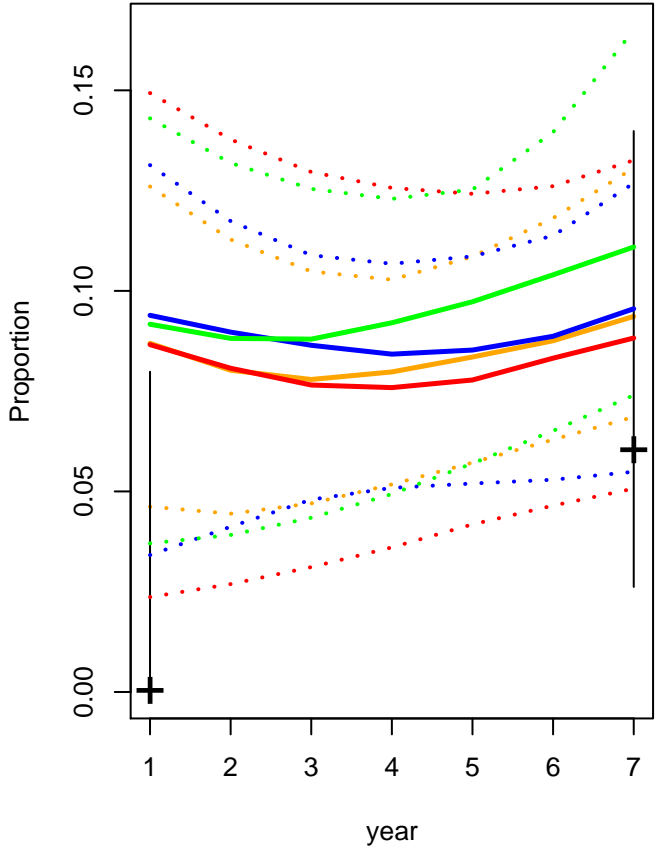

Dead

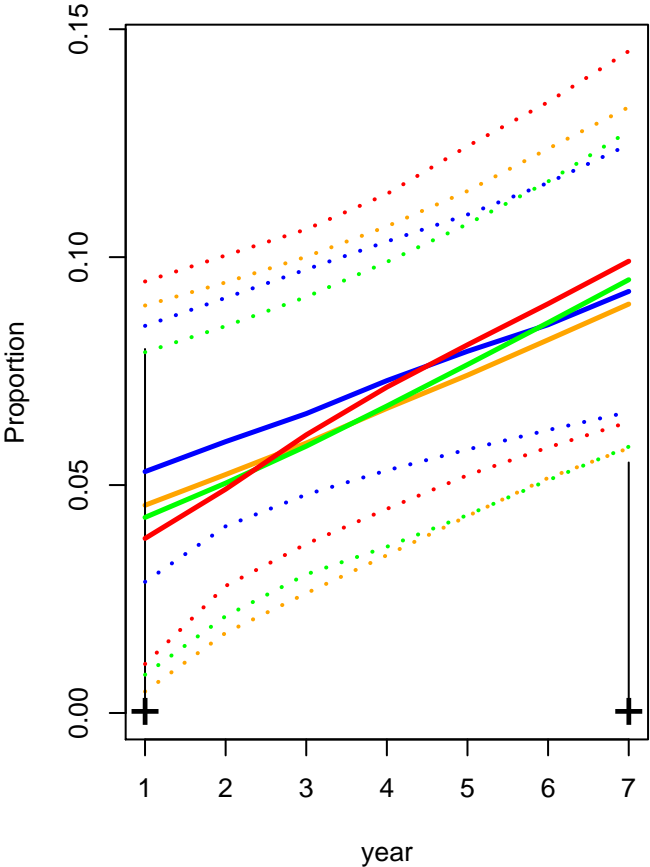

Uninfected

Site 37

Slight Infection

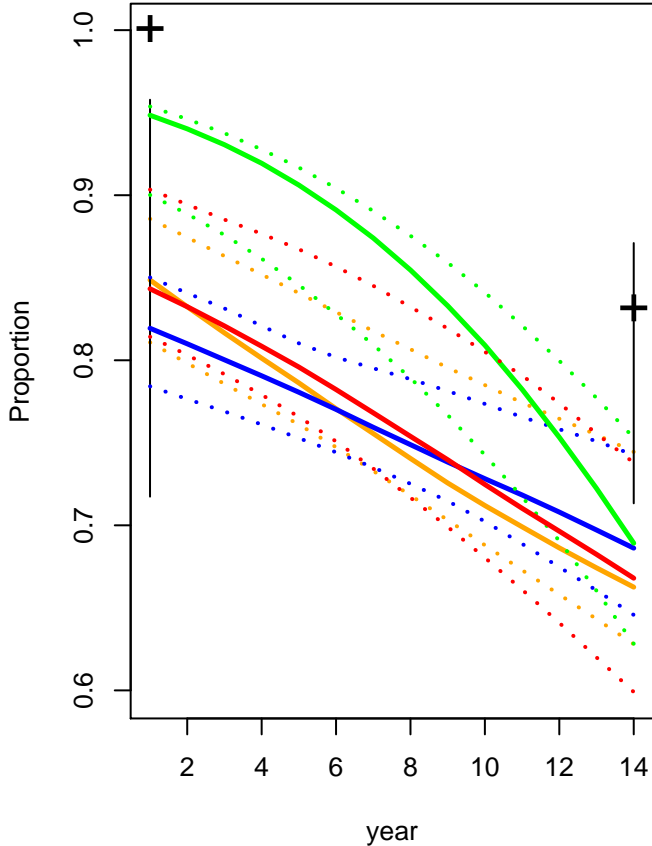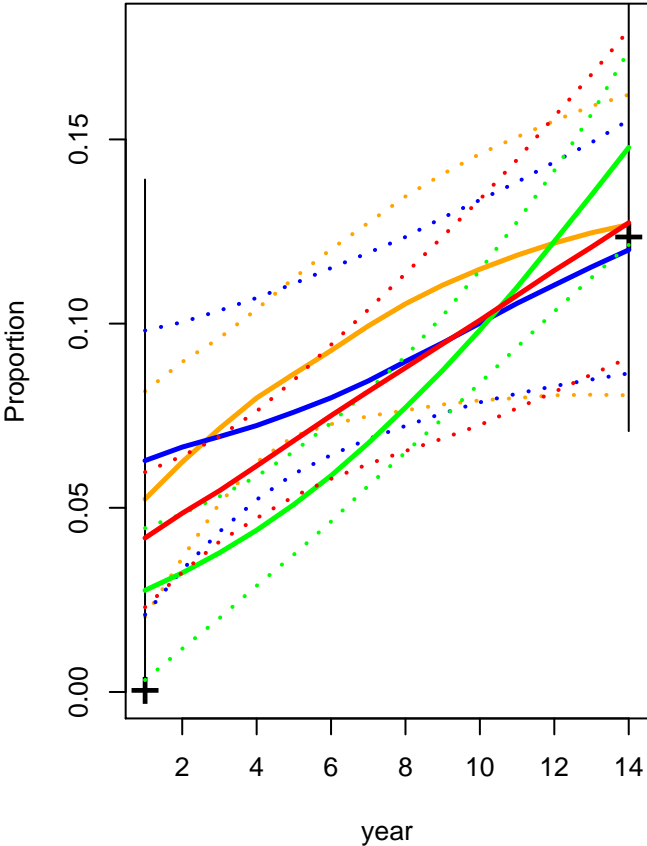

Moderate Infection

Dead

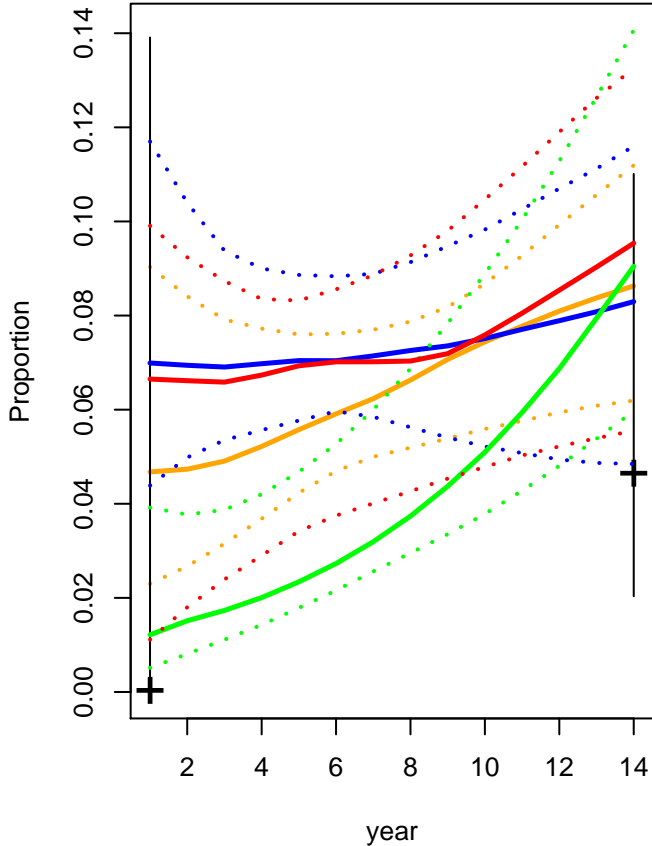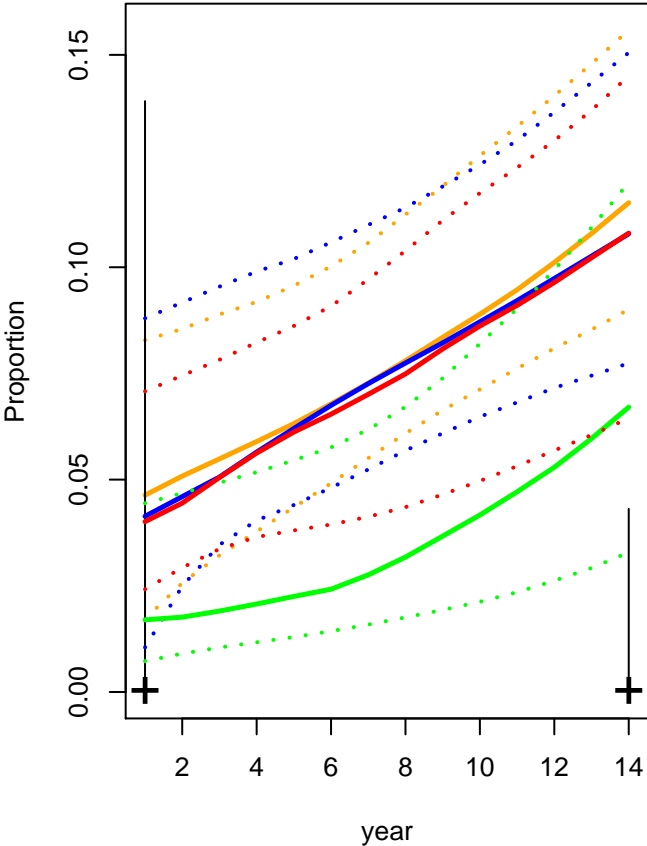

Uninfected

Site 38

Slight Infection

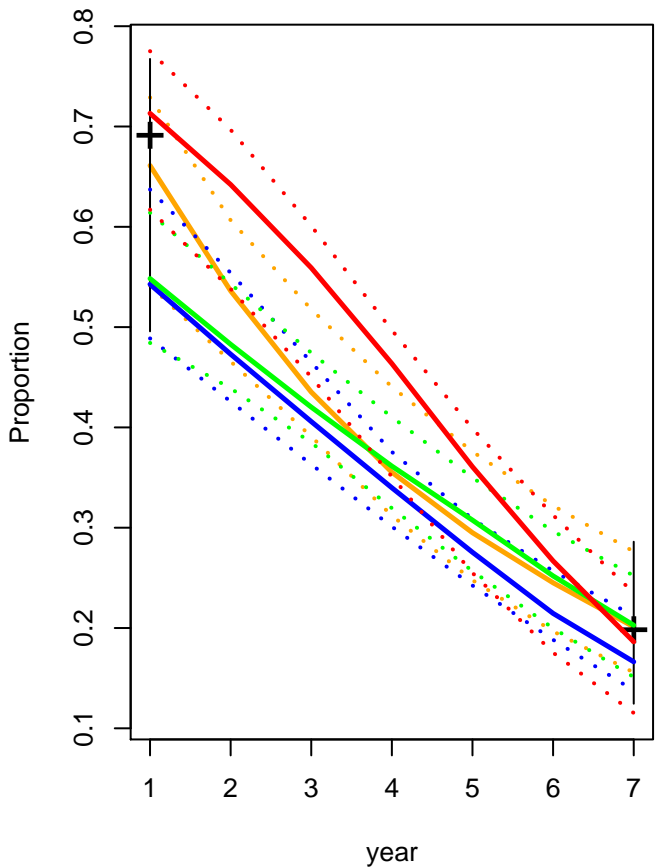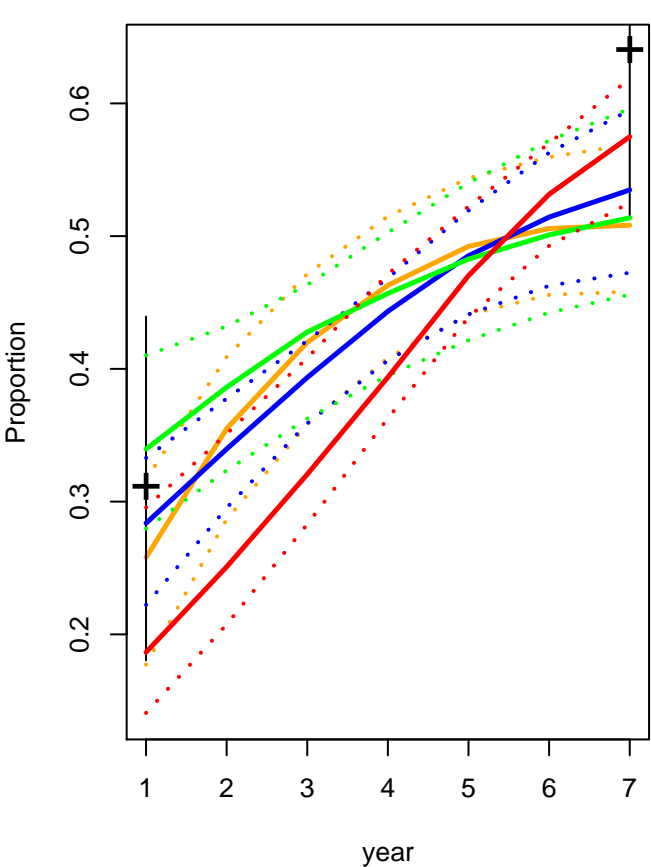

Moderate Infection

Dead

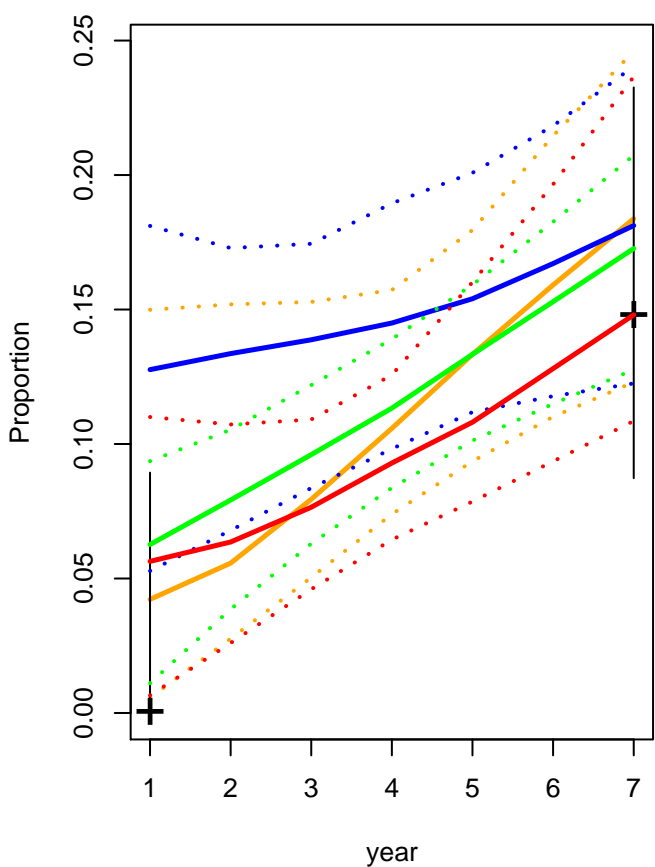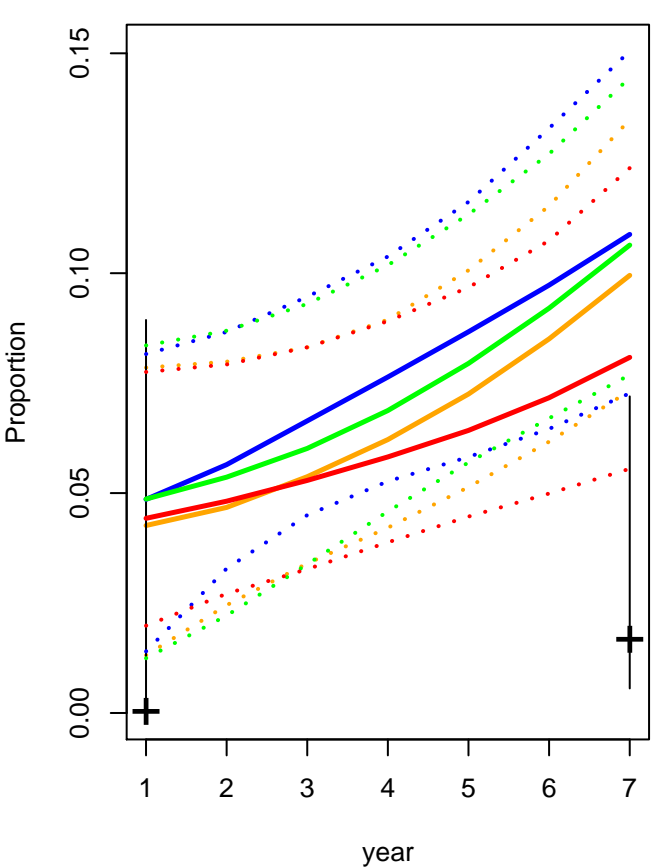



Uninfected

Site 39

Slight Infection

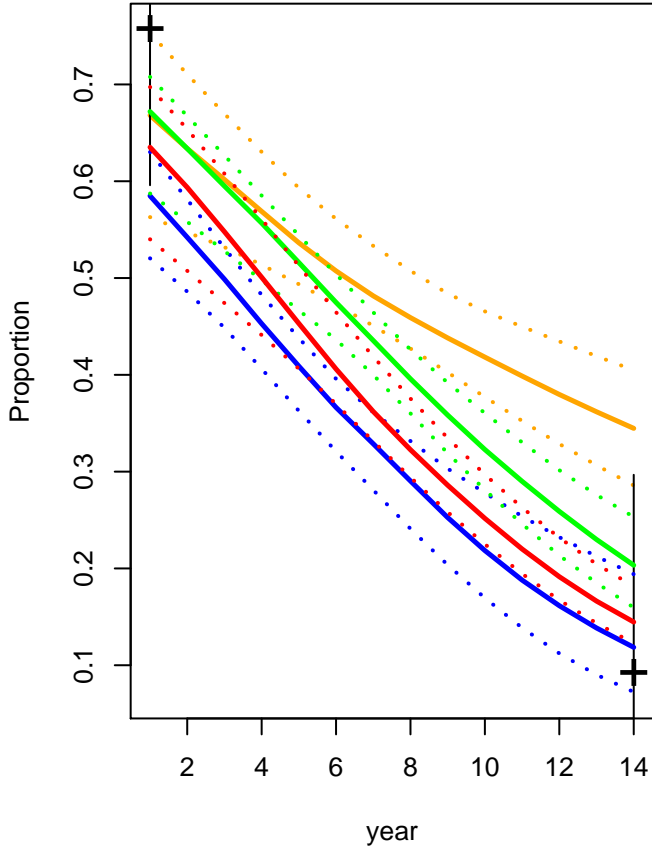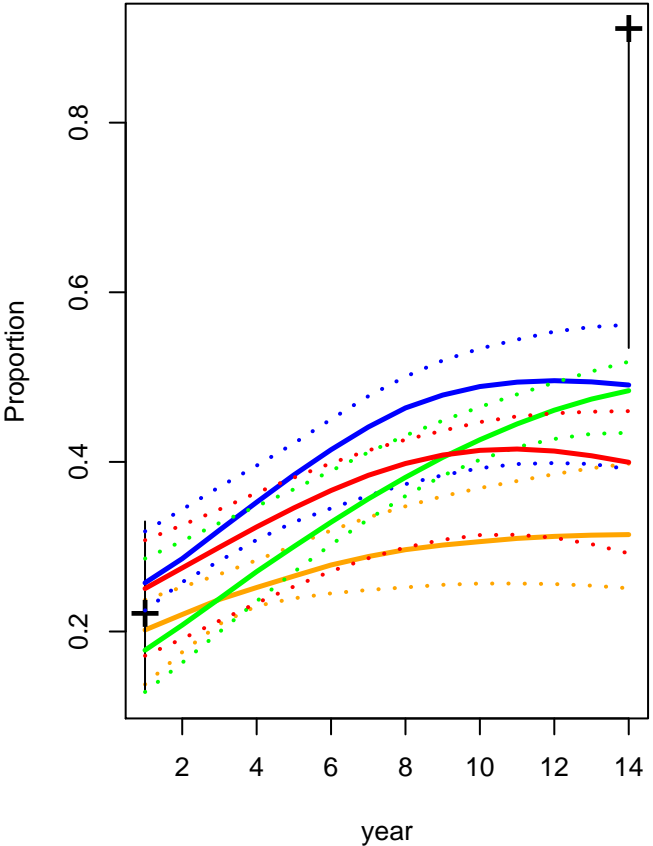

Moderate Infection

Dead

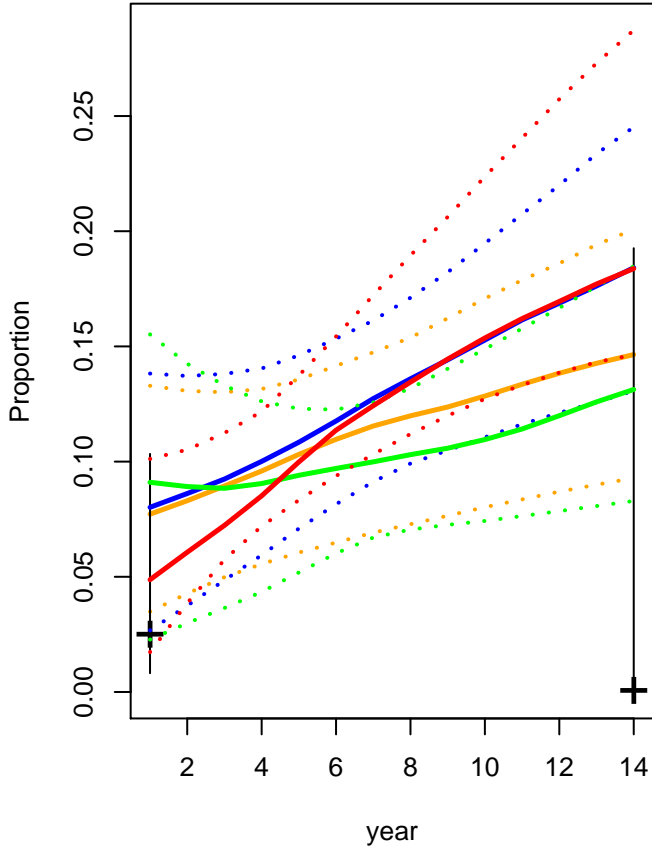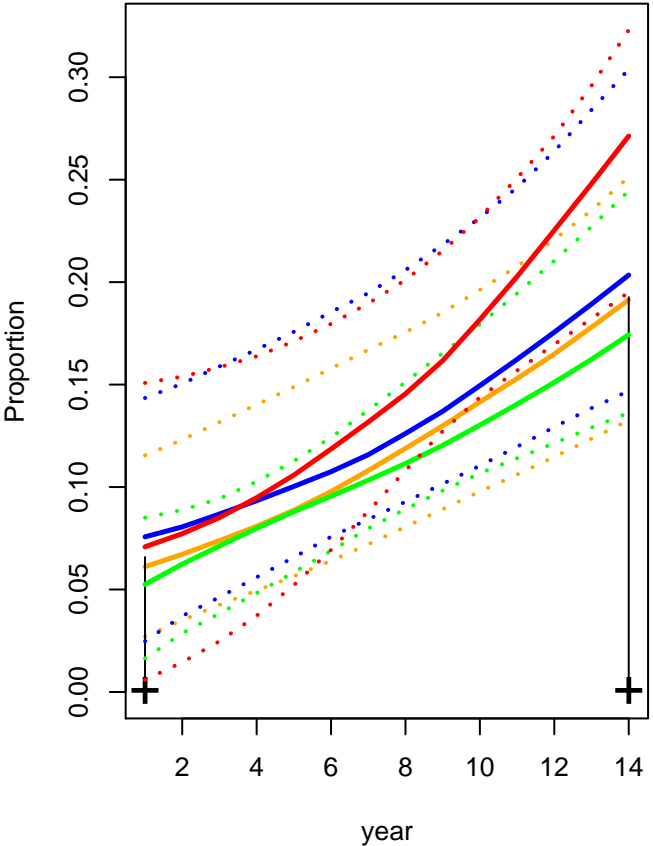

Uninfected

Site 40

Slight Infection

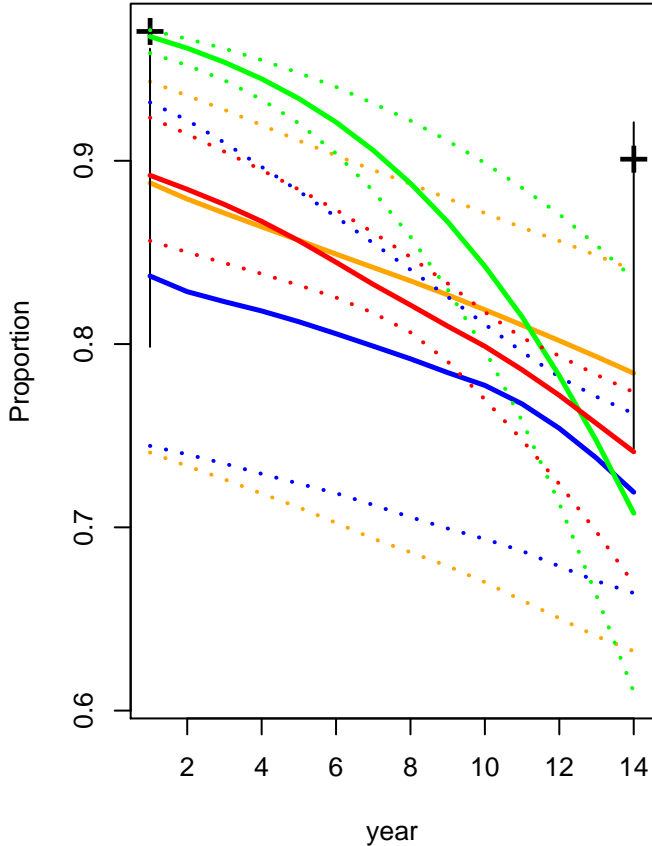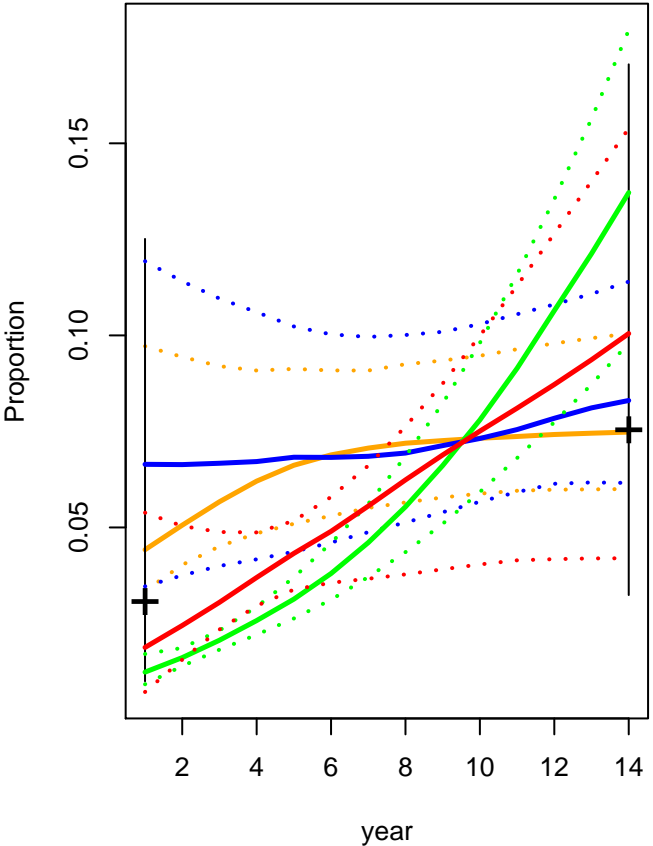

Moderate Infection

Dead

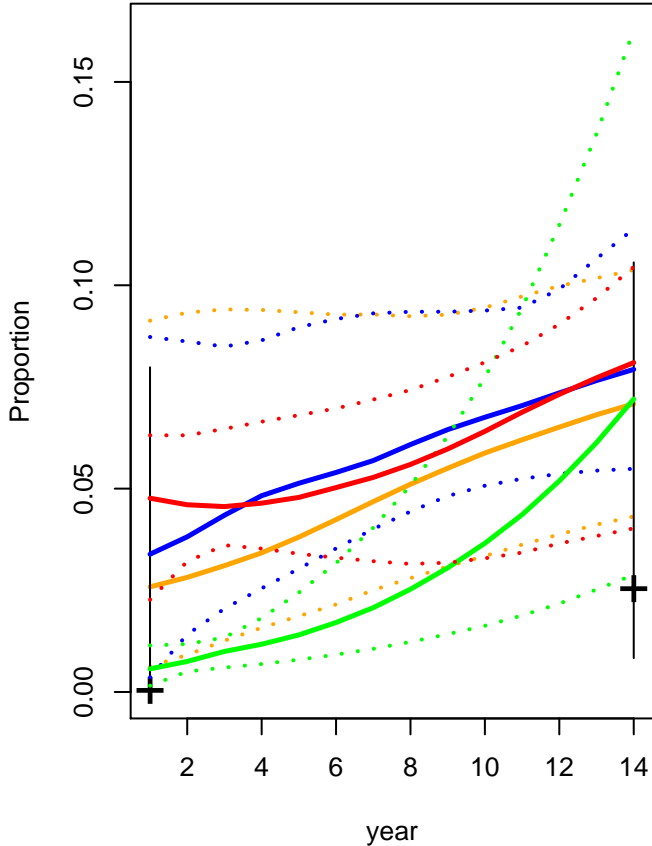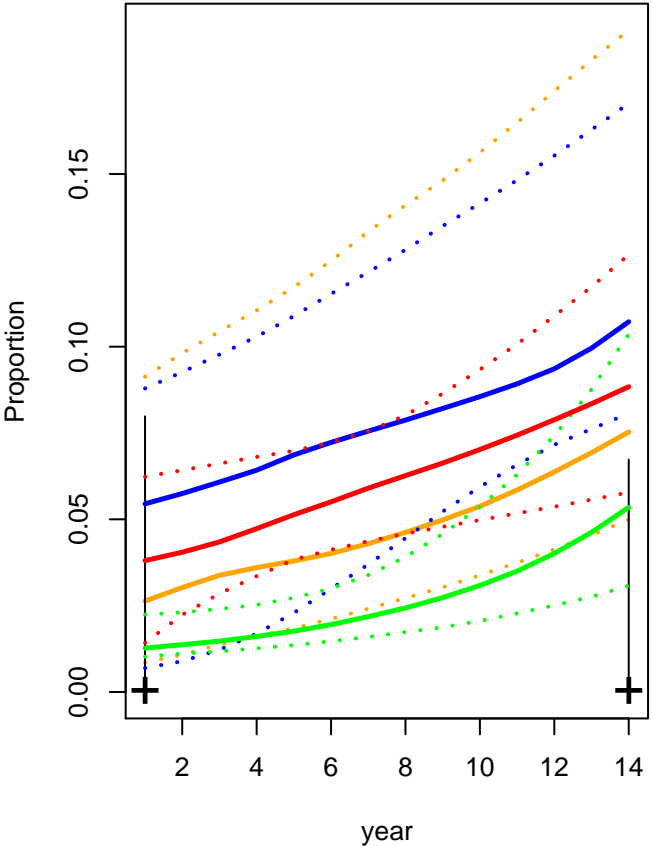

Uninfected

Site 41

Slight Infection

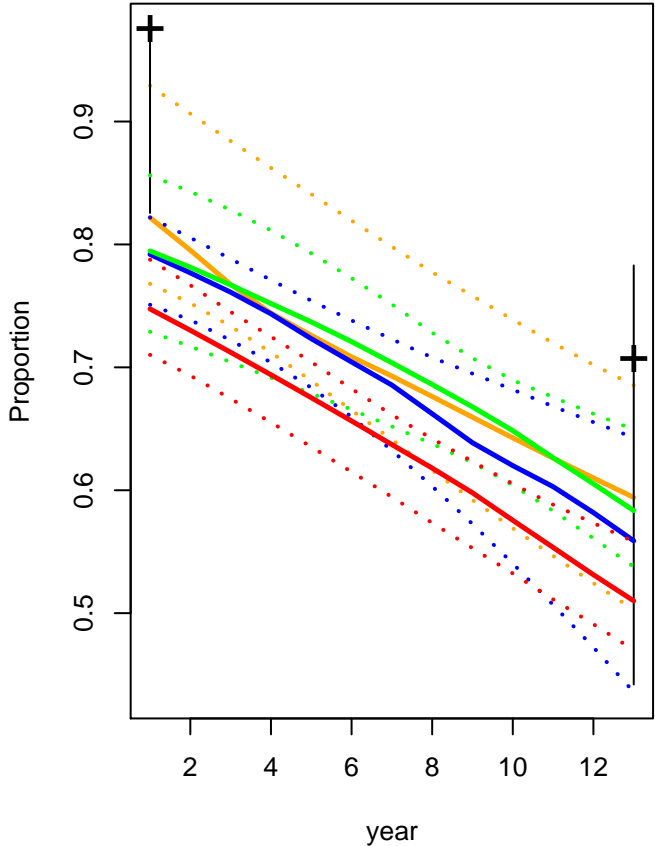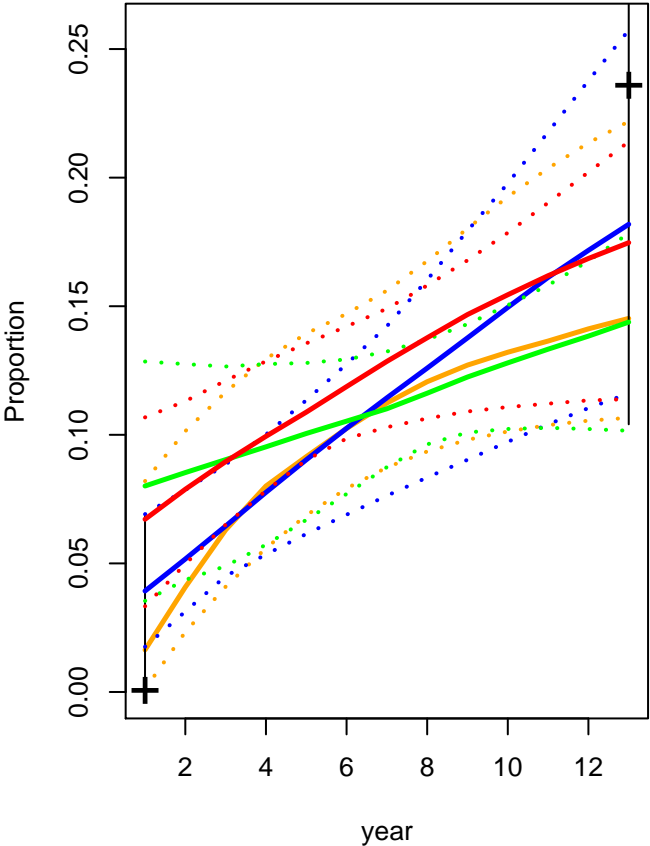

Moderate Infection

Dead

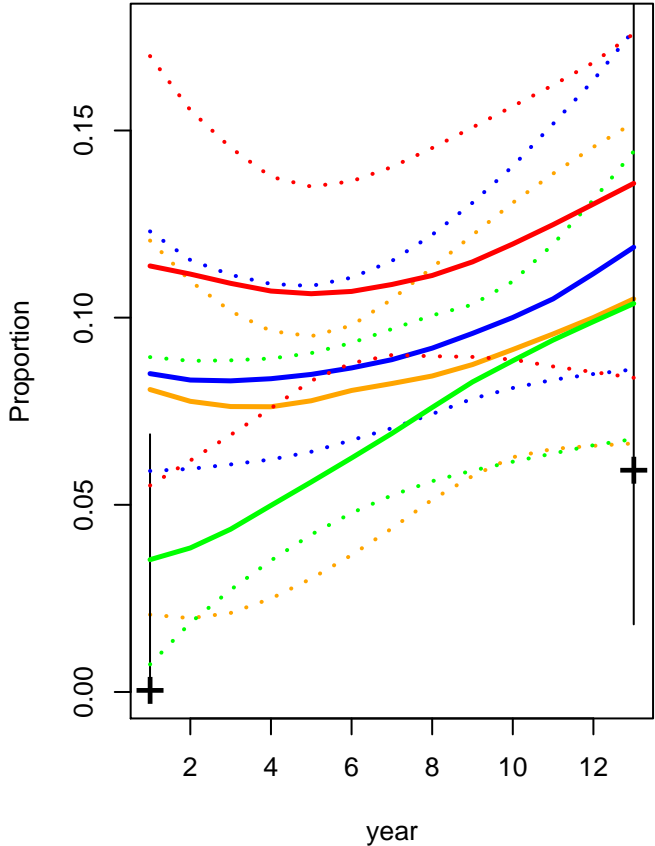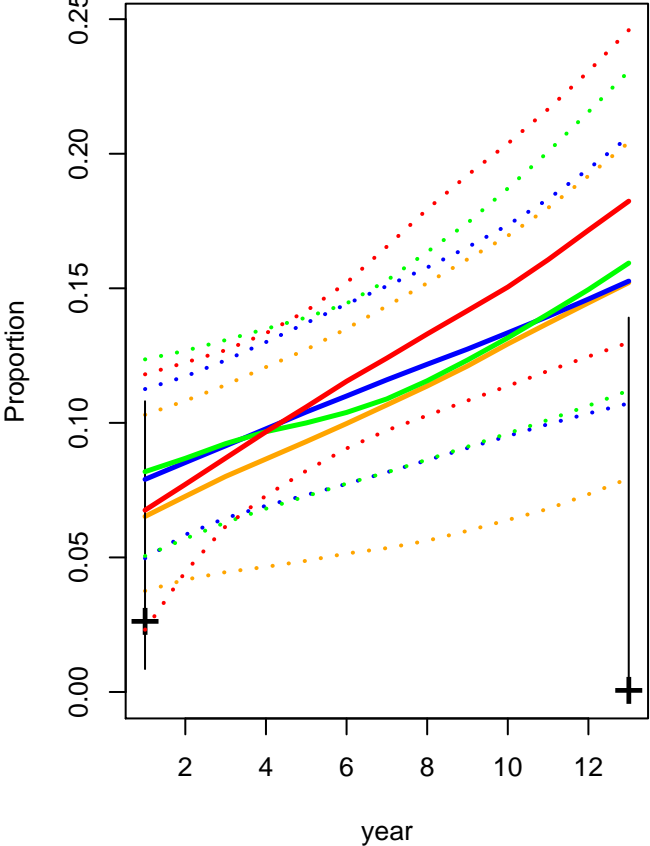

Uninfected

Site 42

Slight Infection

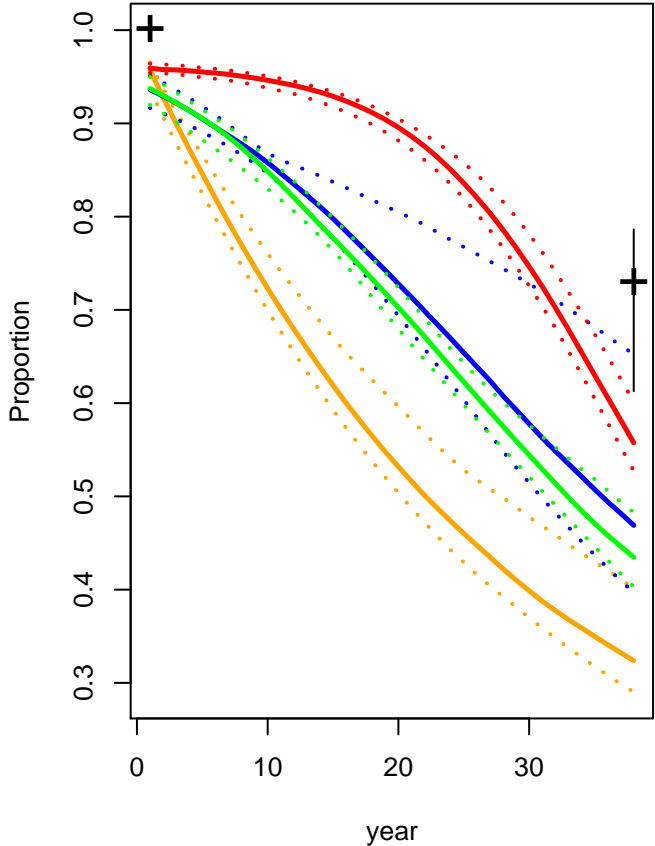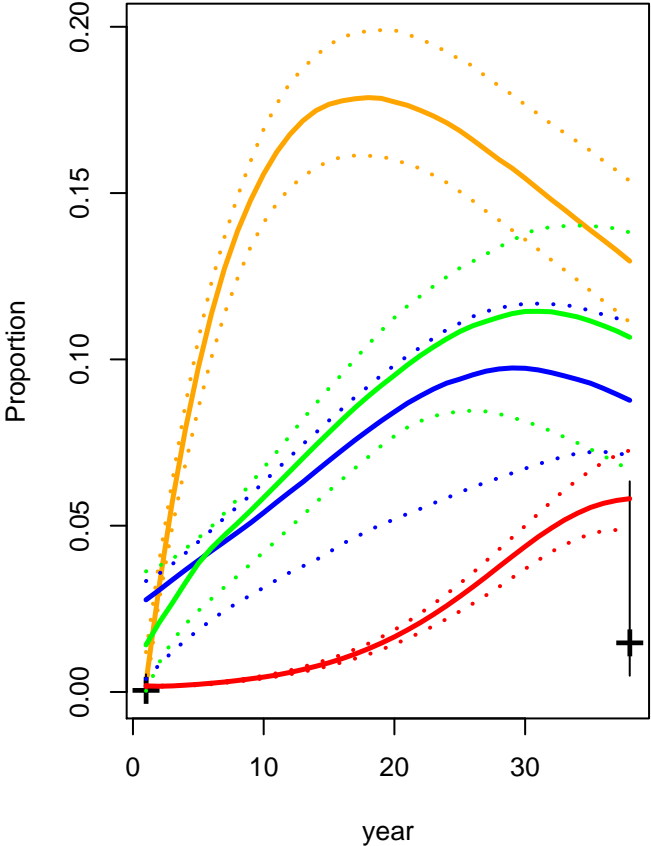

Moderate Infection

Dead

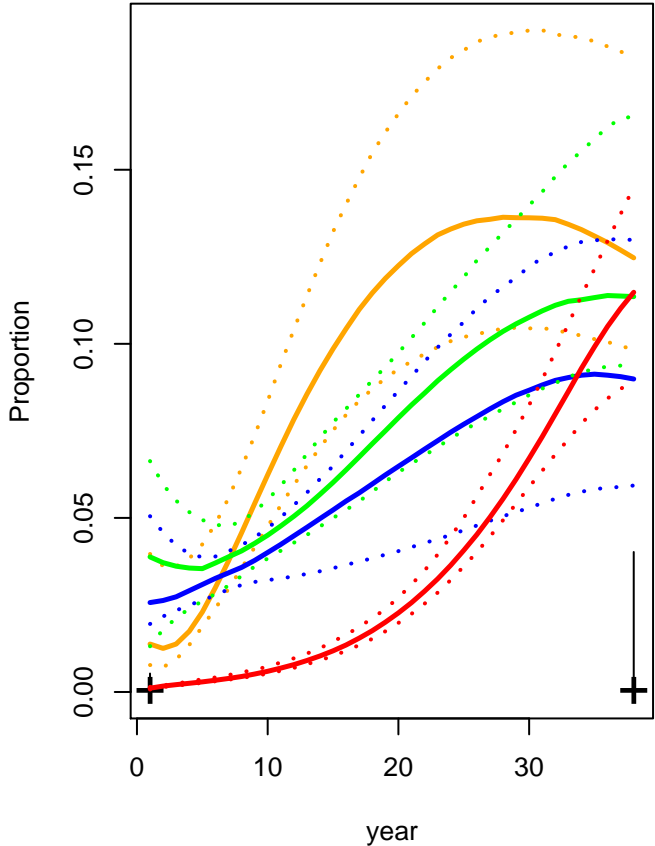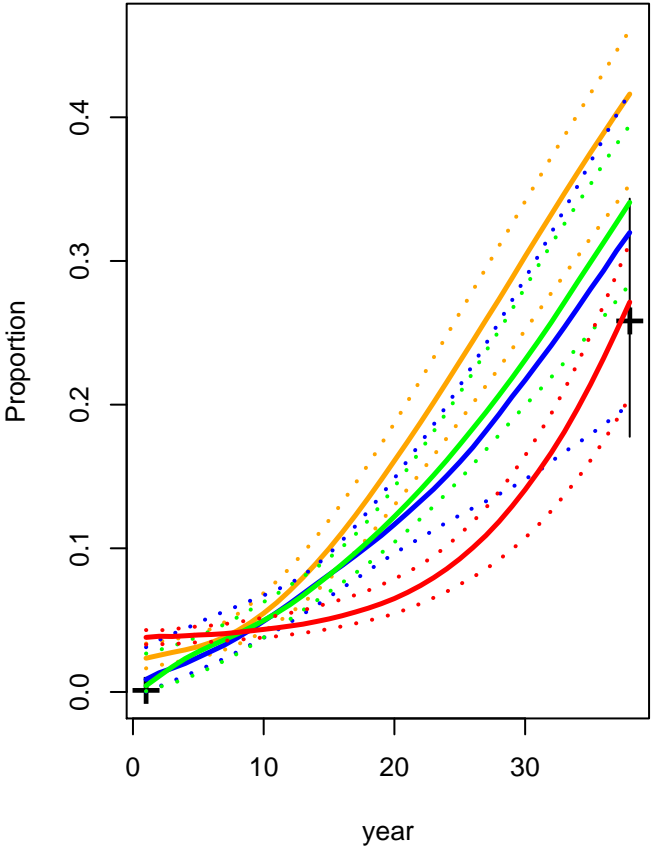

Uninfected

Site 43

Slight Infection

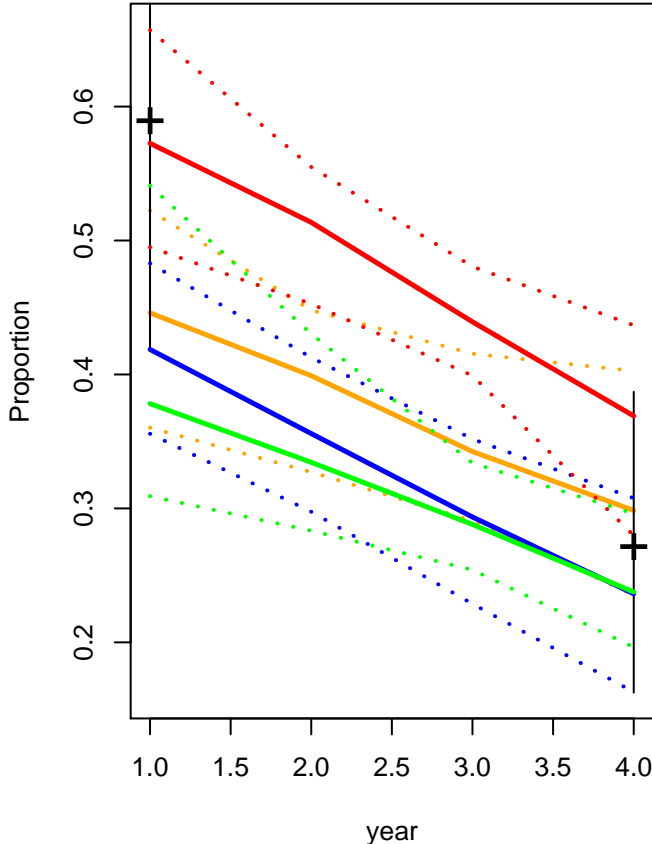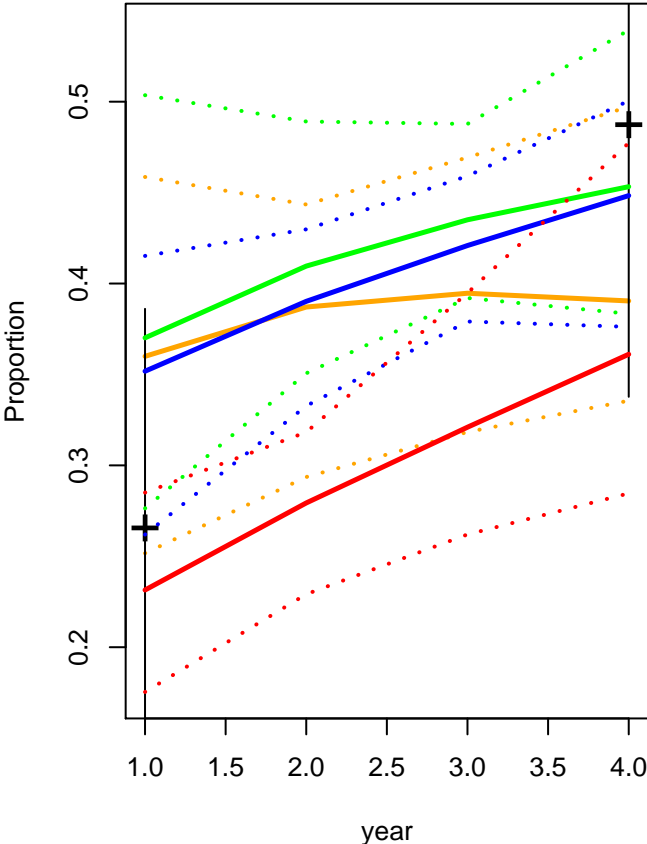

Moderate Infection

Dead

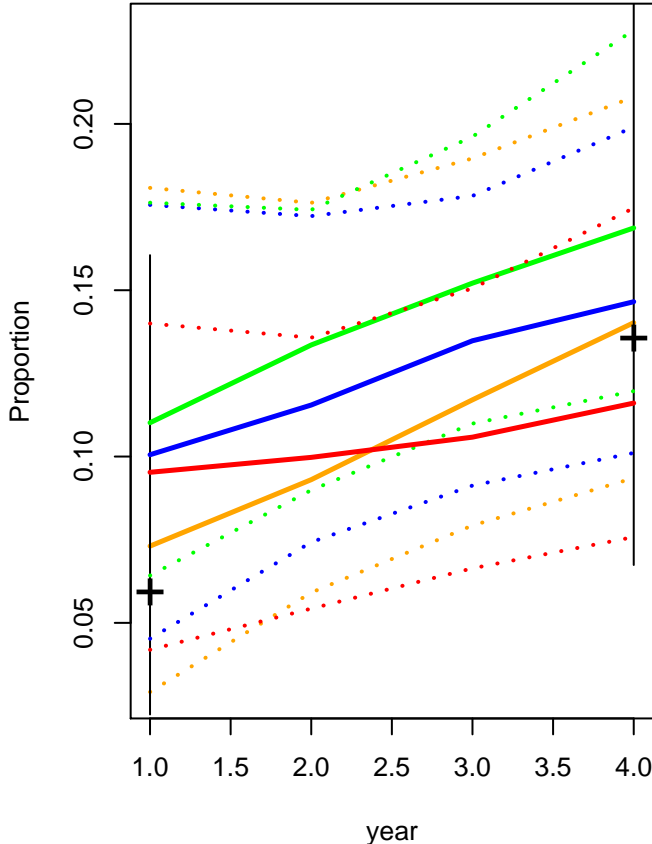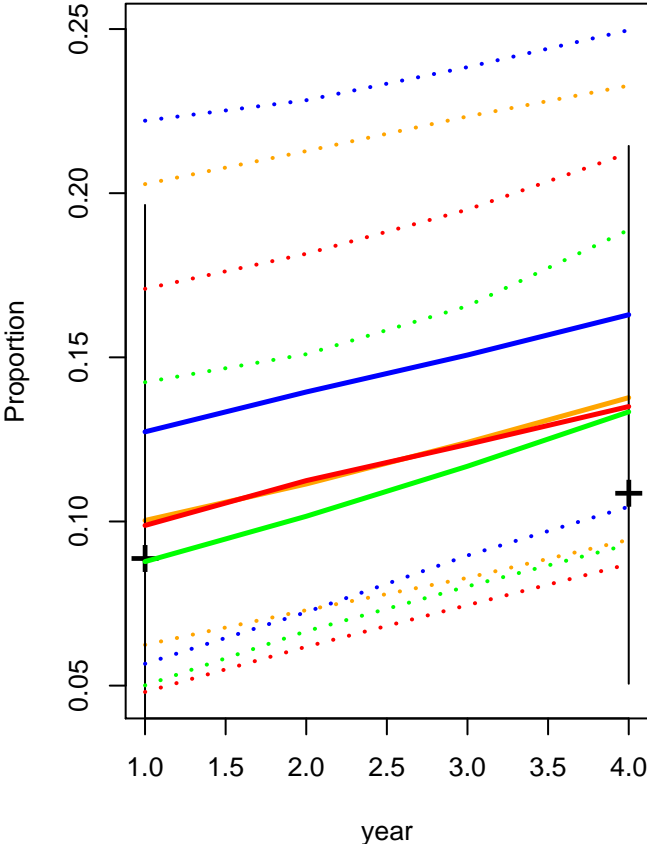

Uninfected

Site 44

Slight Infection

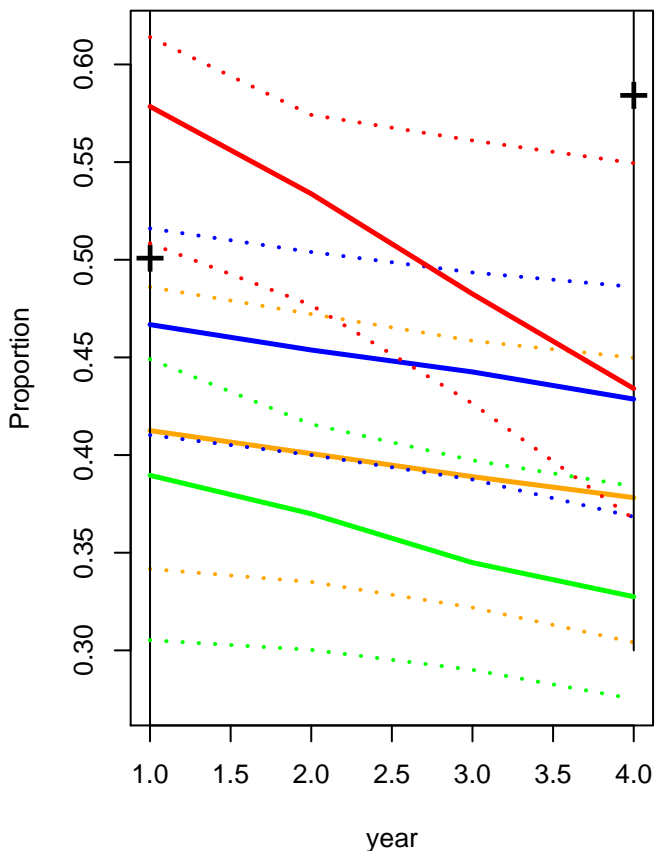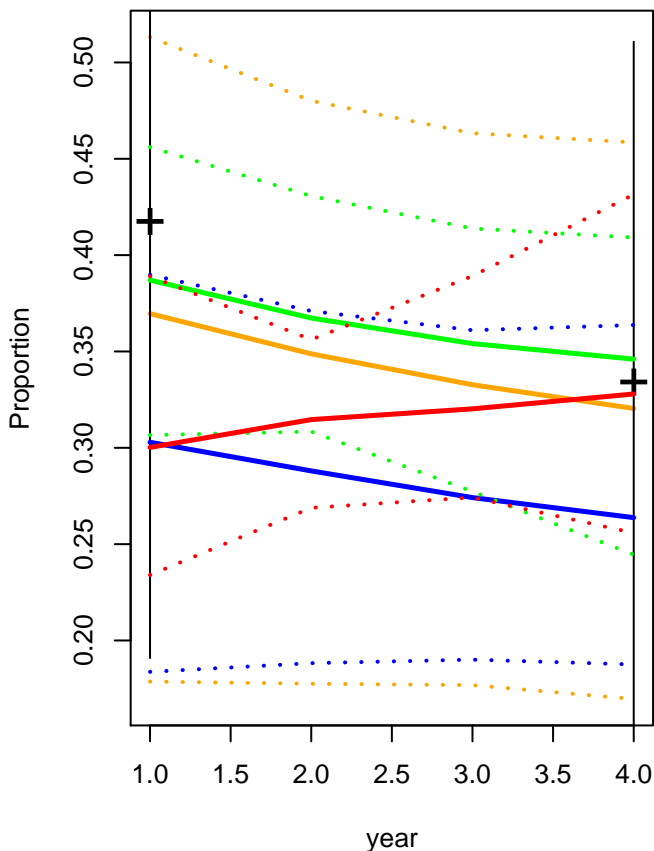

Moderate Infection

Dead

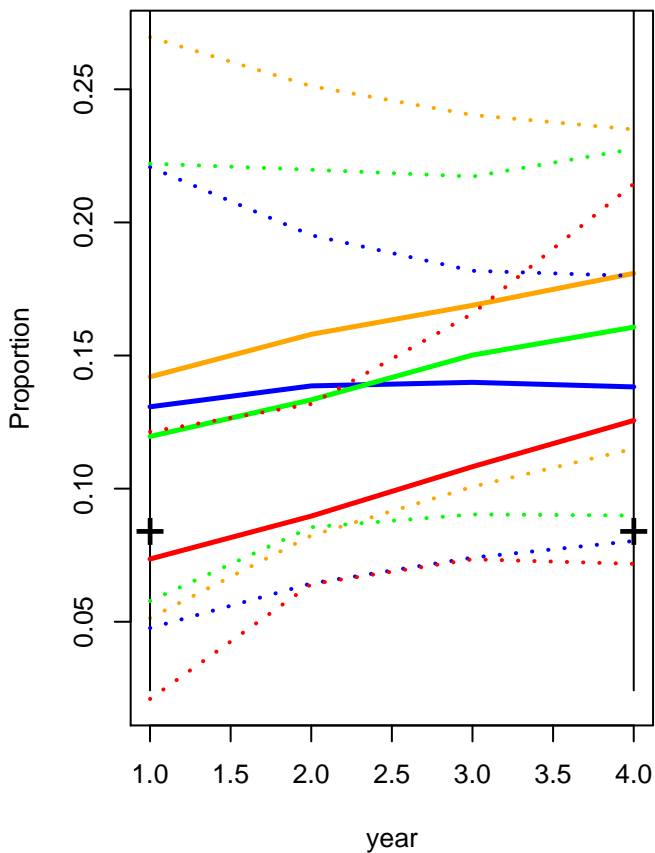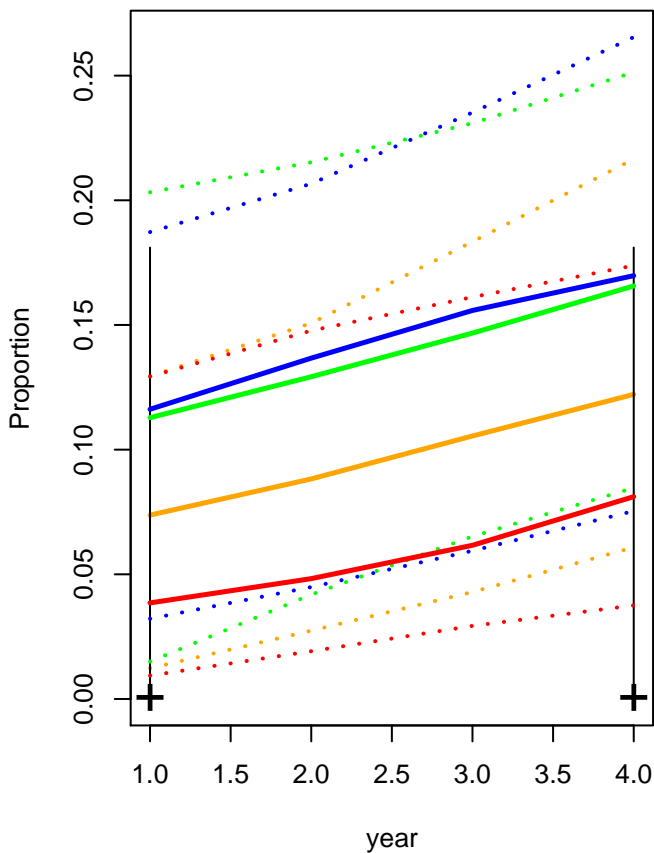

Uninfected

Site 45

Slight Infection

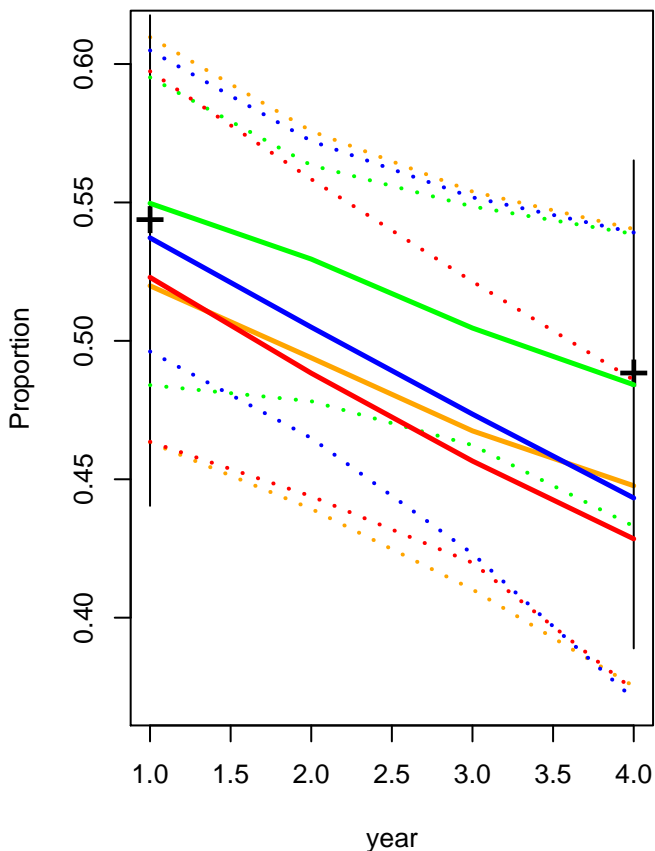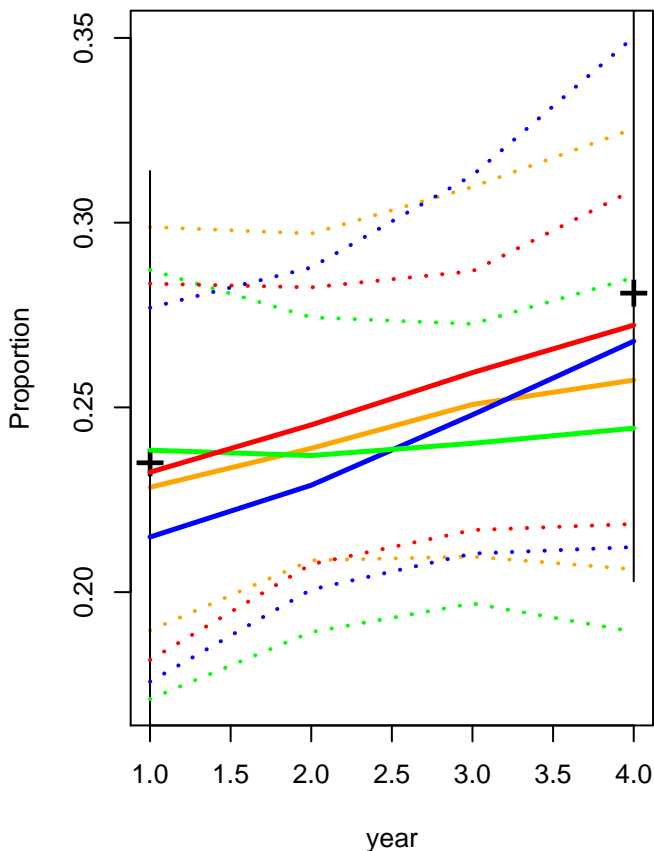

Moderate Infection

Dead

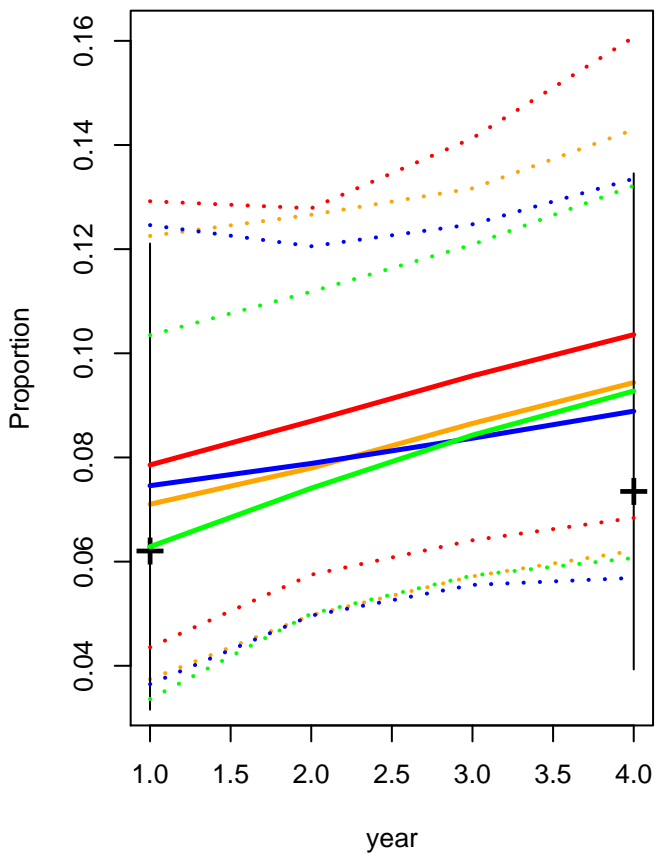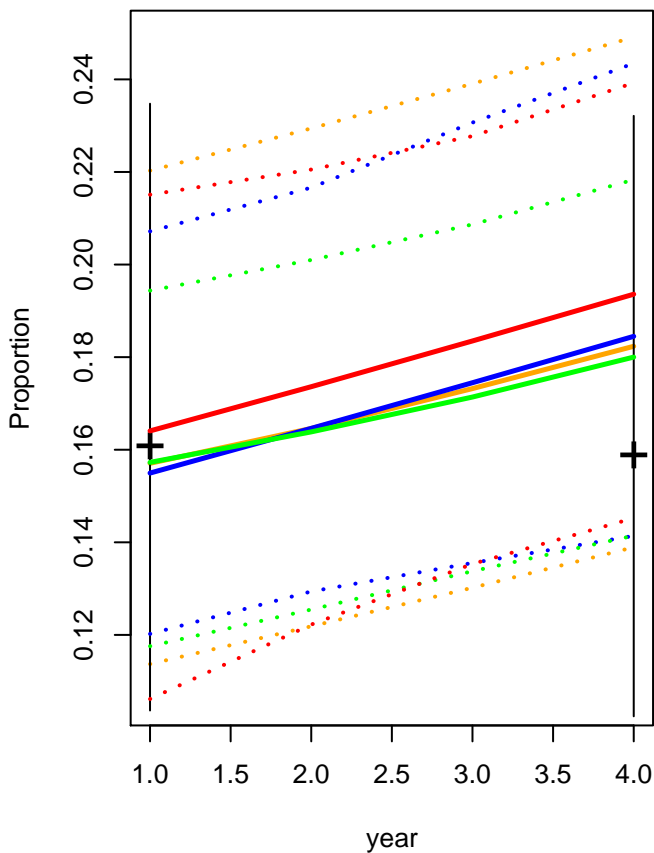

Uninfected

Site 46

Slight Infection

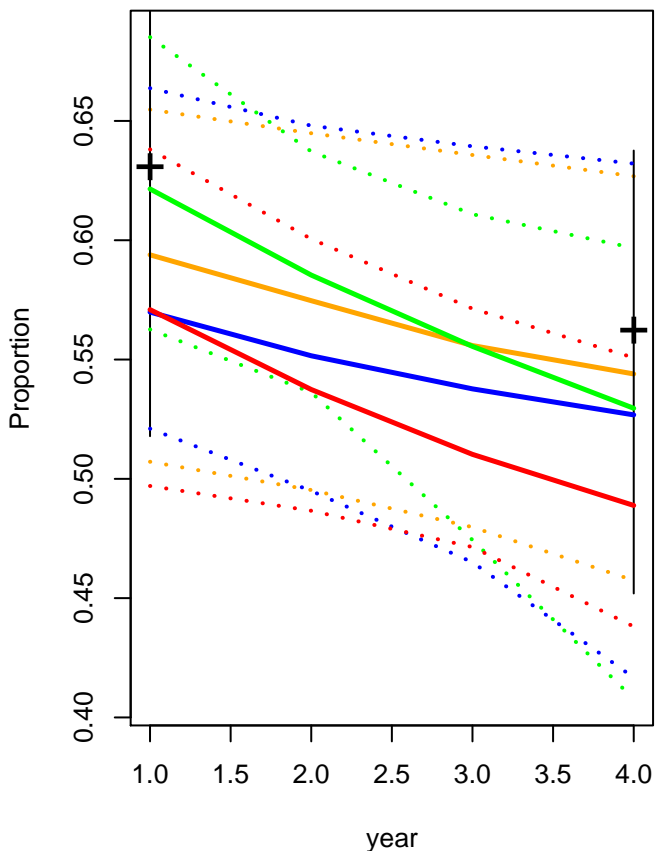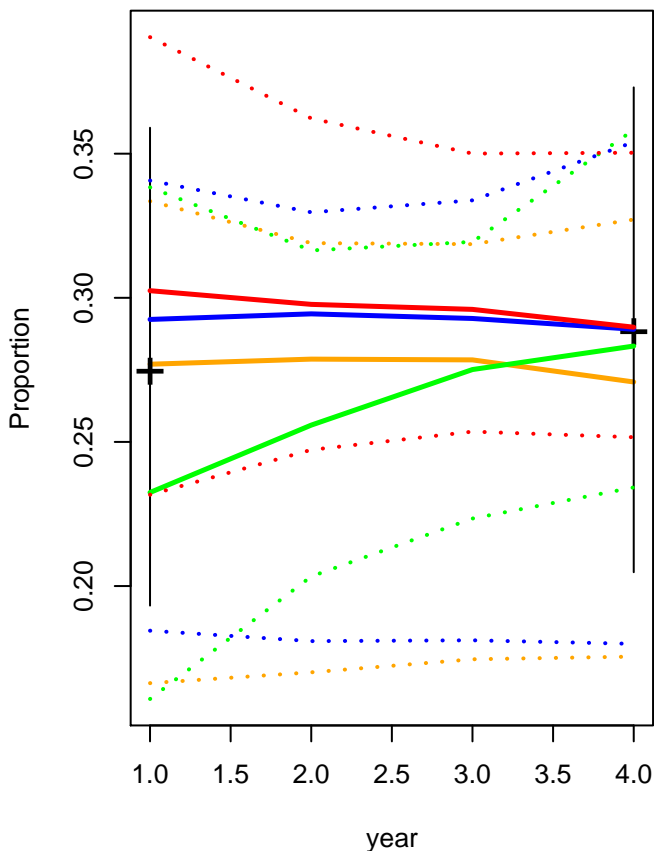

Moderate Infection

Dead

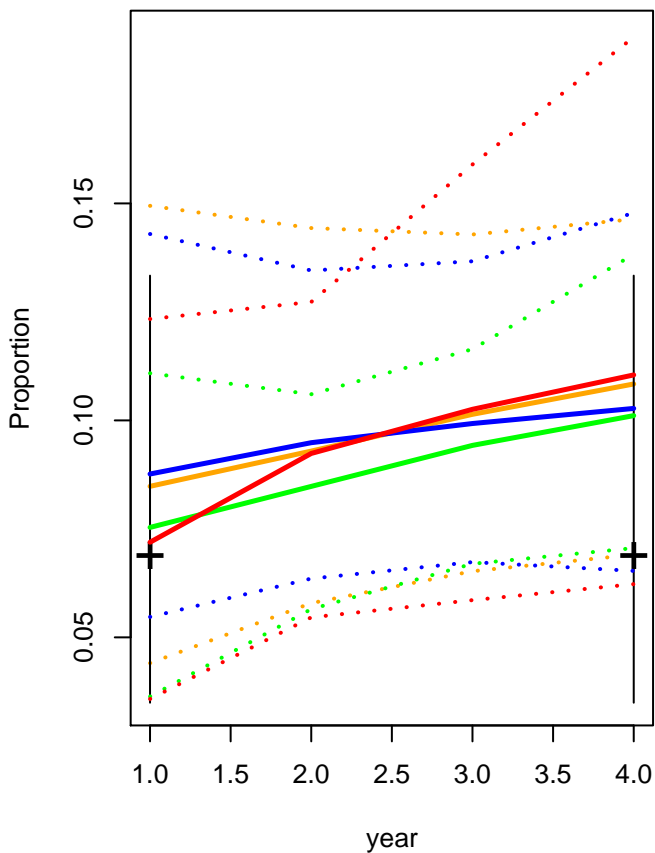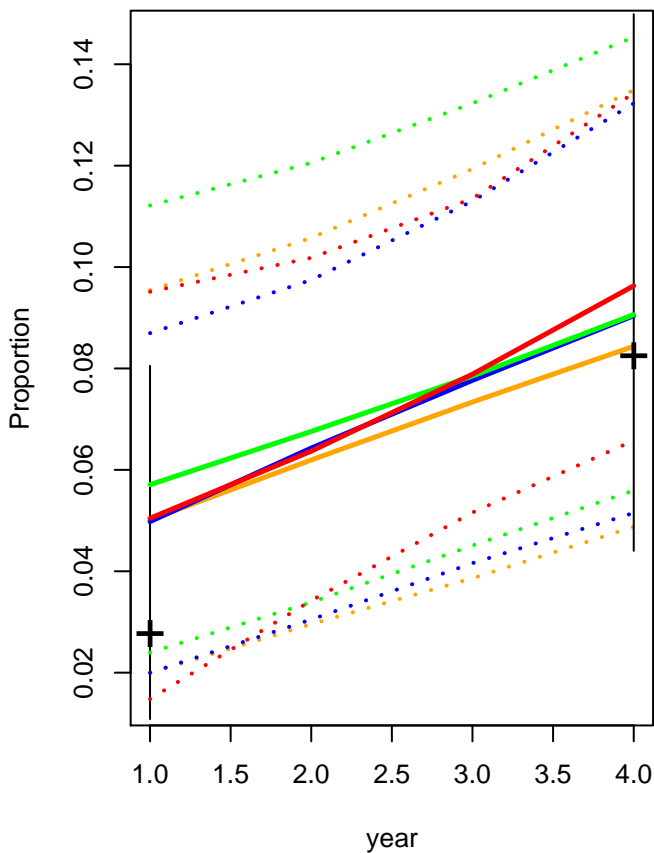



Uninfected

Site 47

Slight Infection

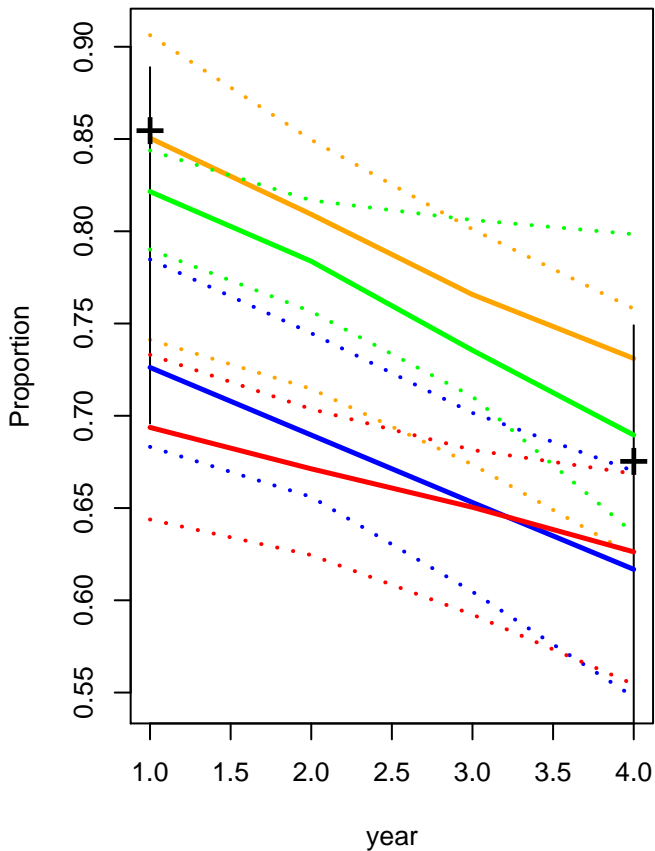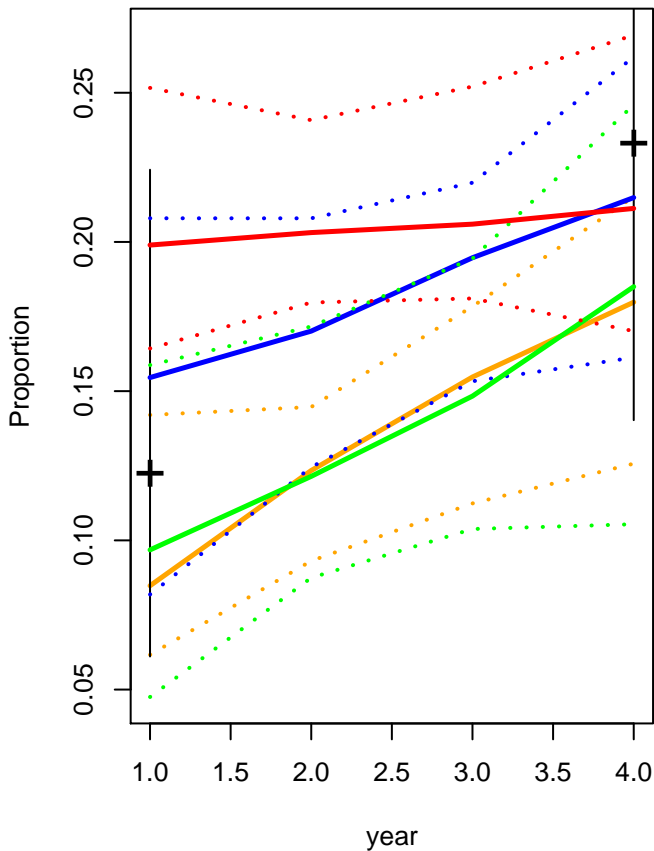

Moderate Infection

Dead

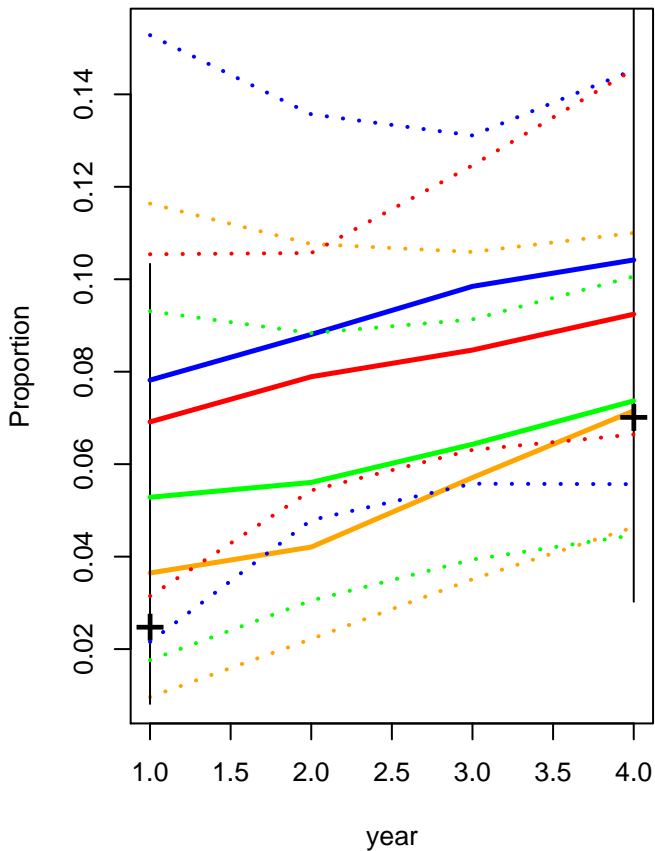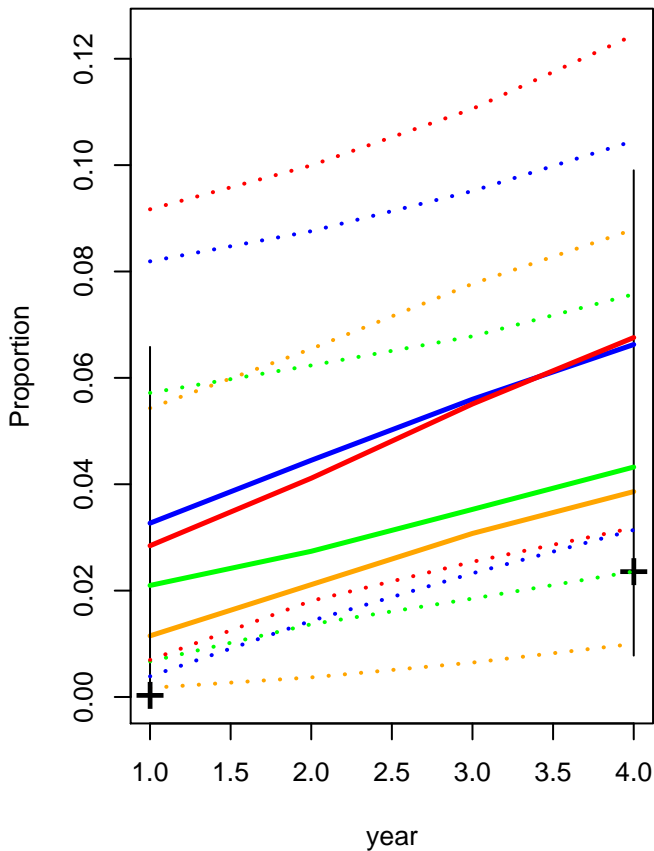

Uninfected

Site 48

Slight Infection

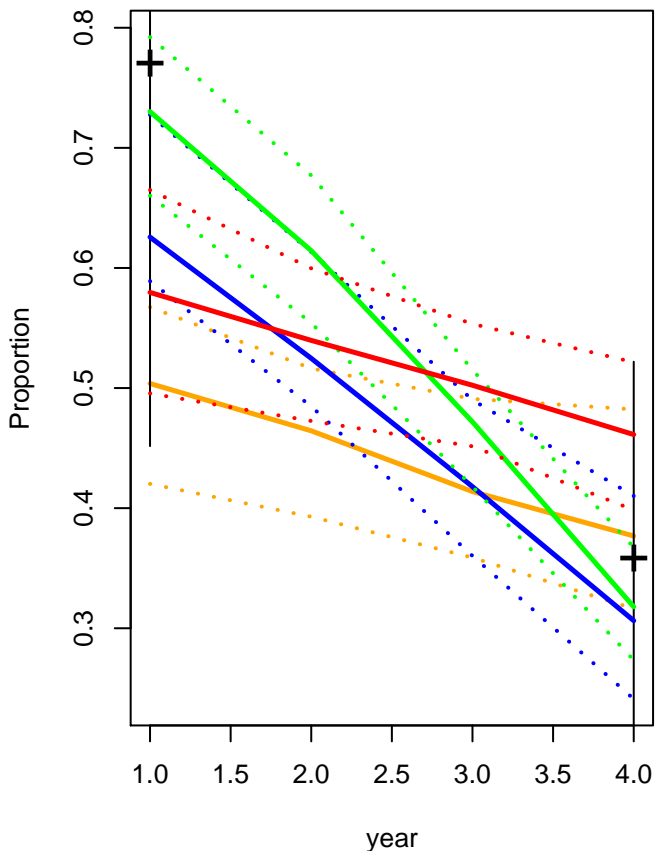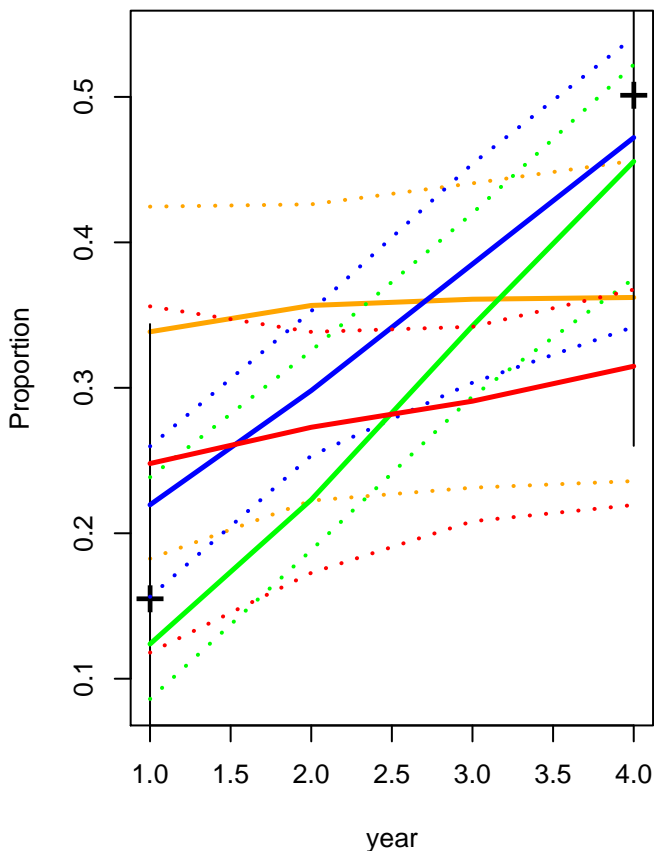

Moderate Infection

Dead

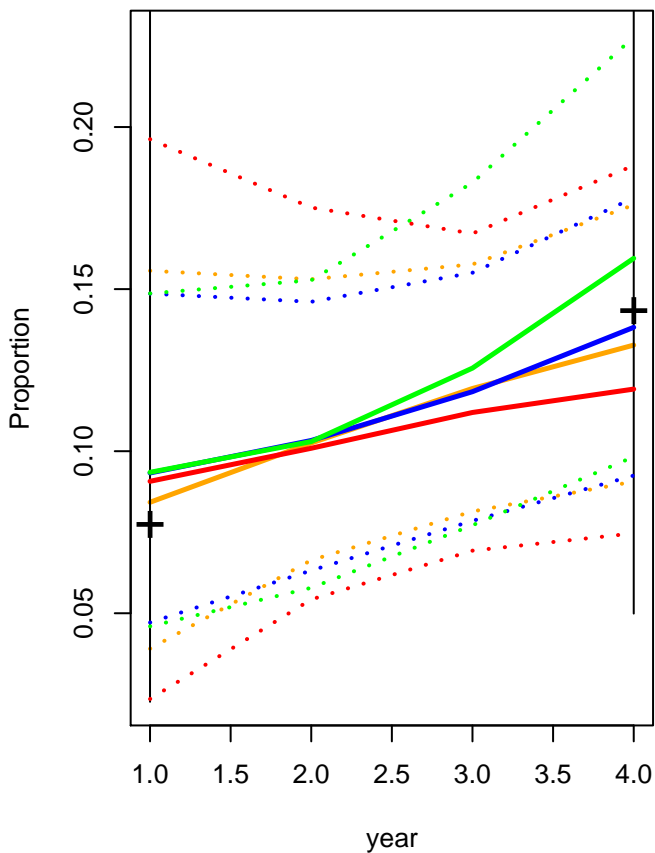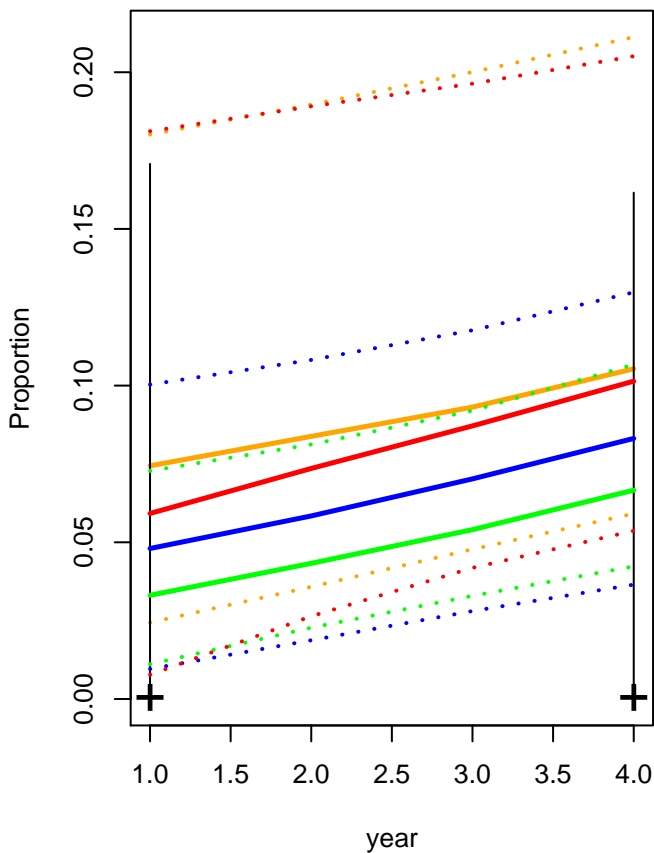

Uninfected

Site 49

Slight Infection

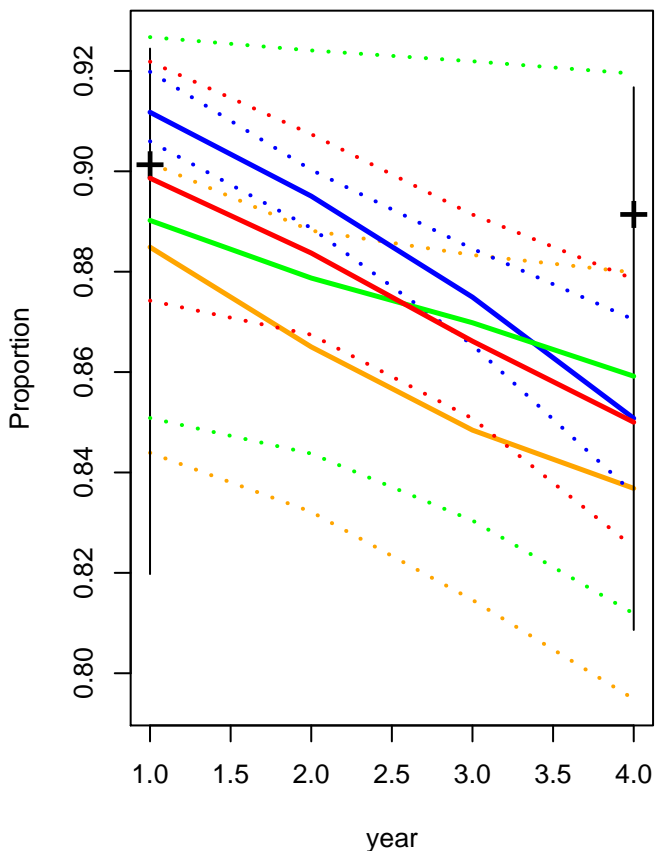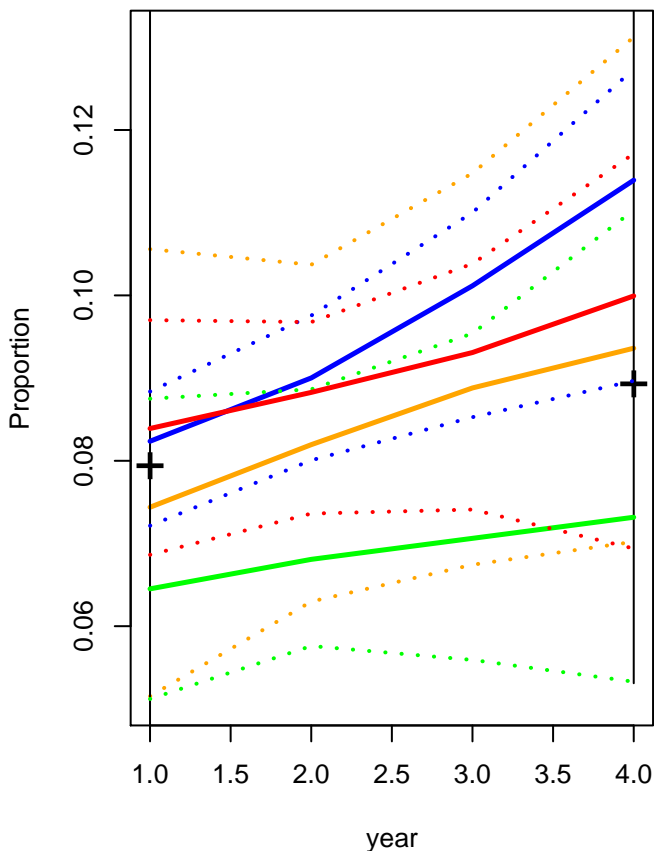

Moderate Infection

Dead

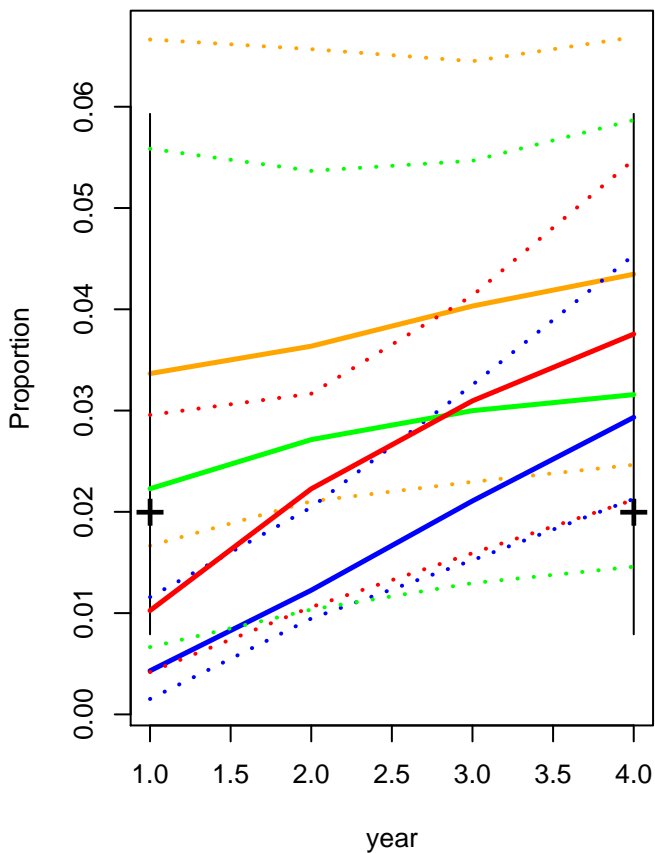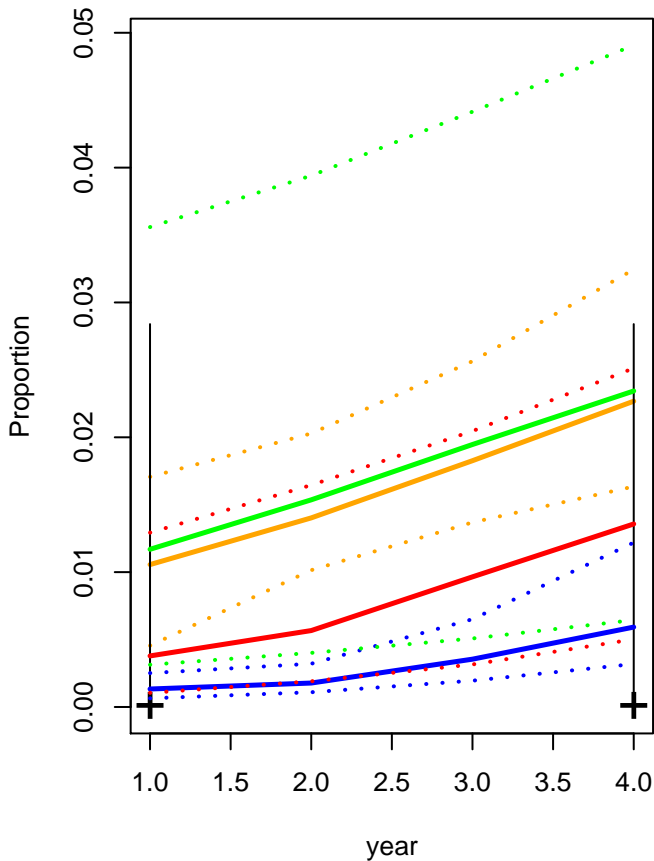

Uninfected

Site 50

Slight Infection

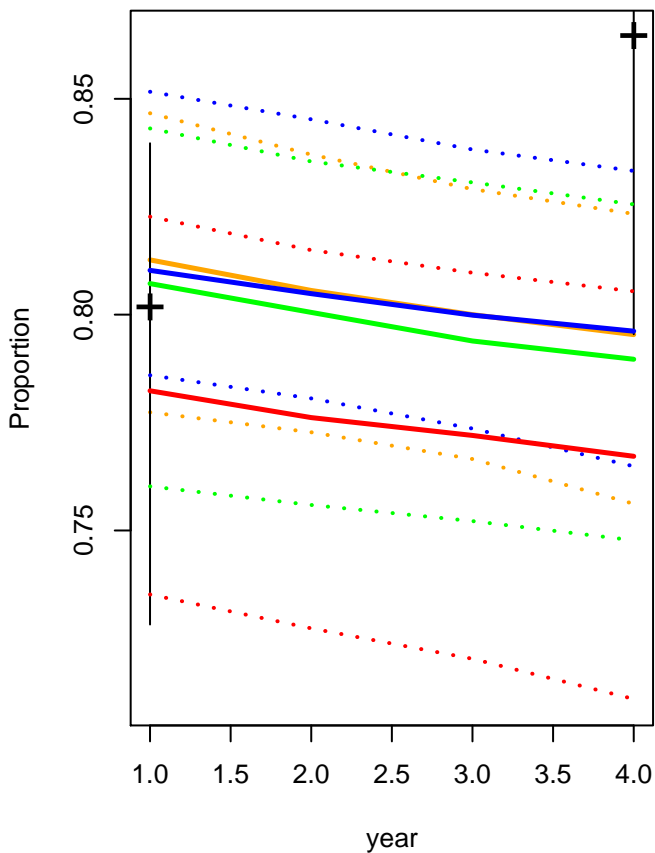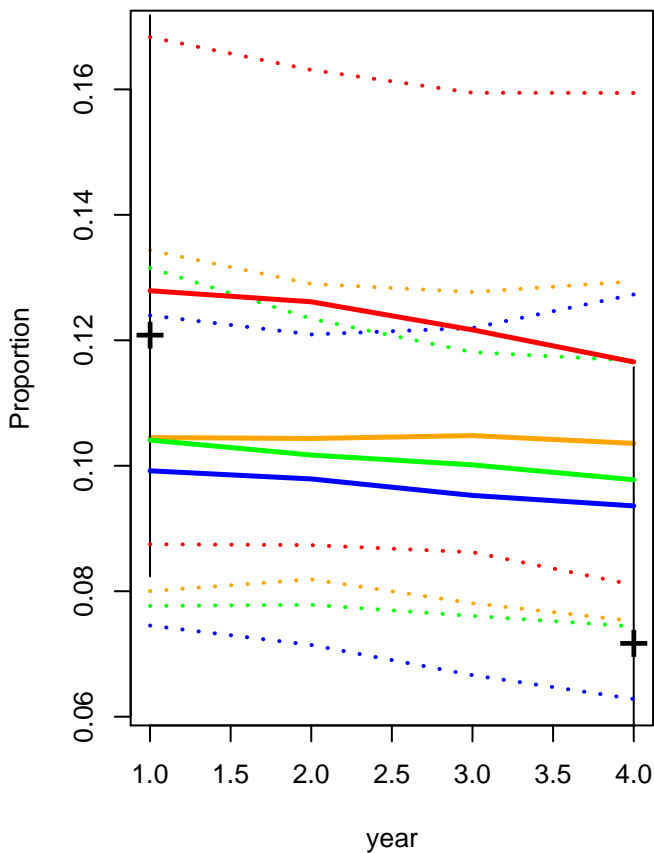

Moderate Infection

Dead

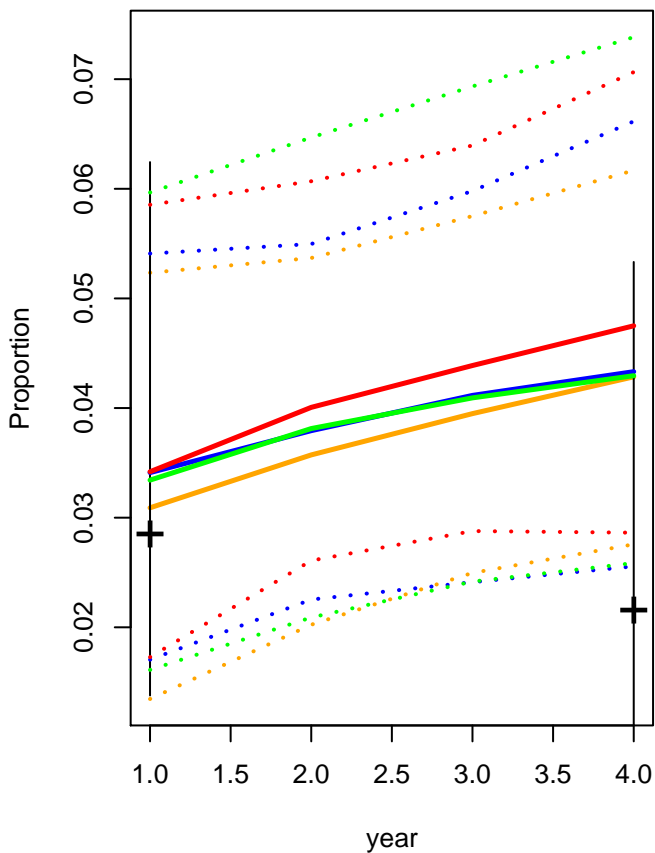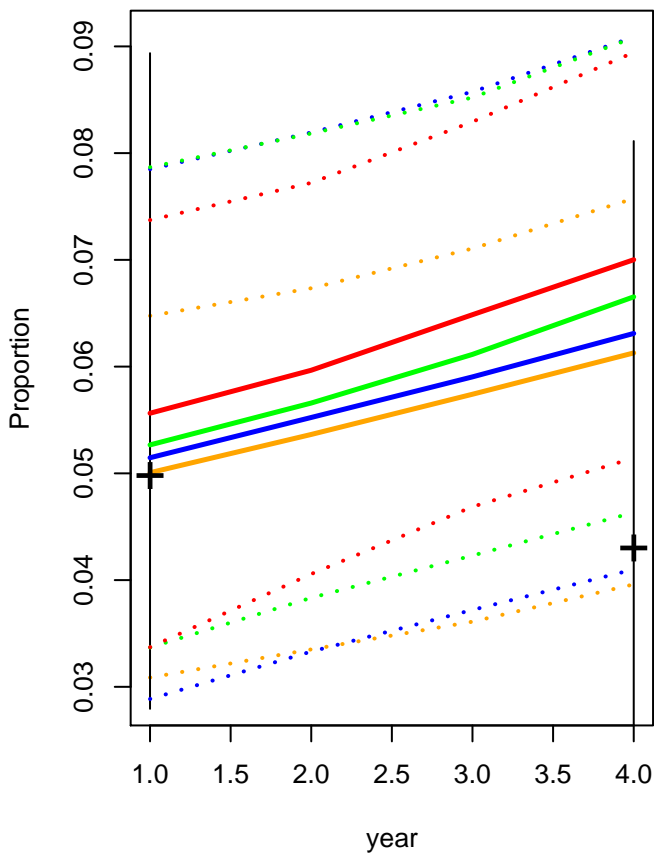

Uninfected

Site 51

Slight Infection

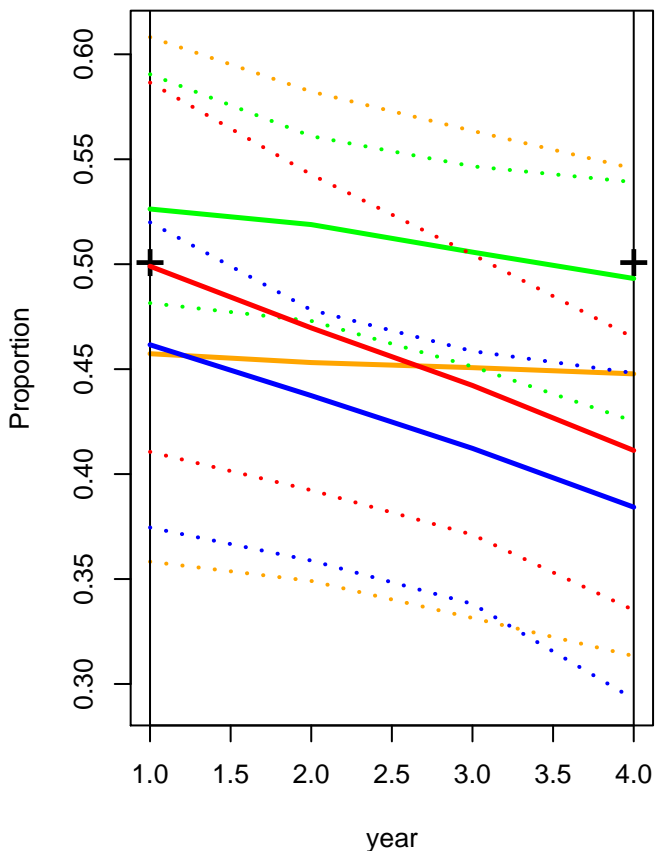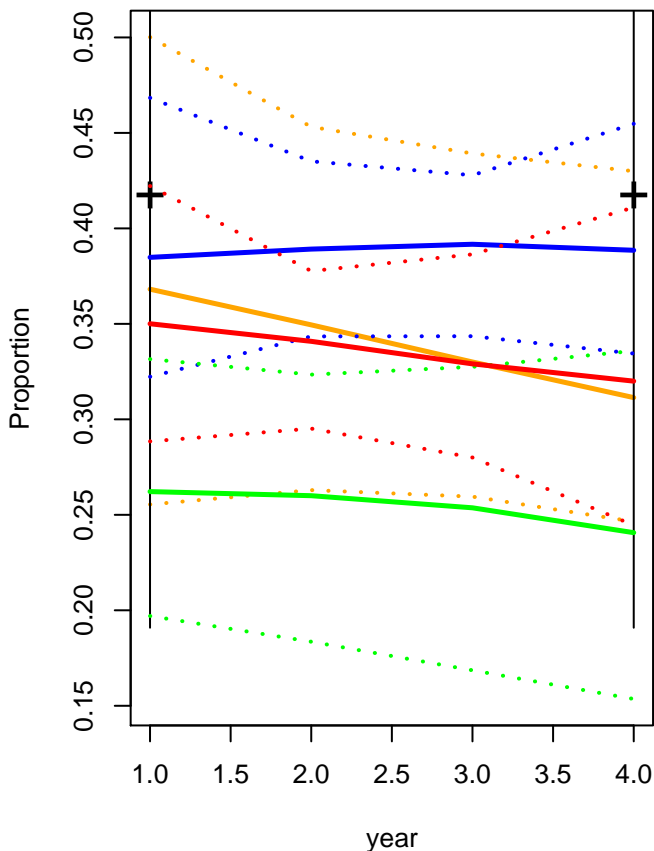

Moderate Infection

Dead

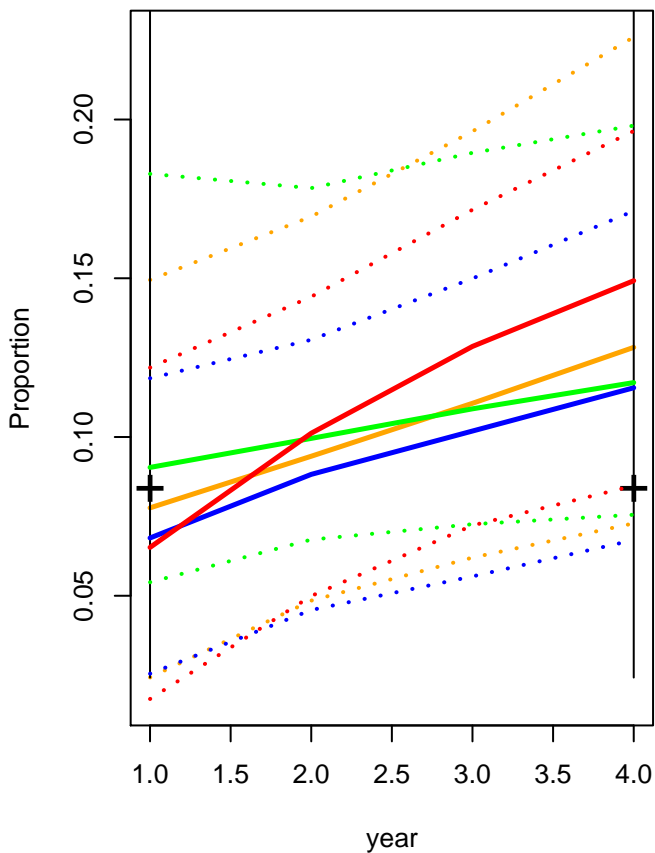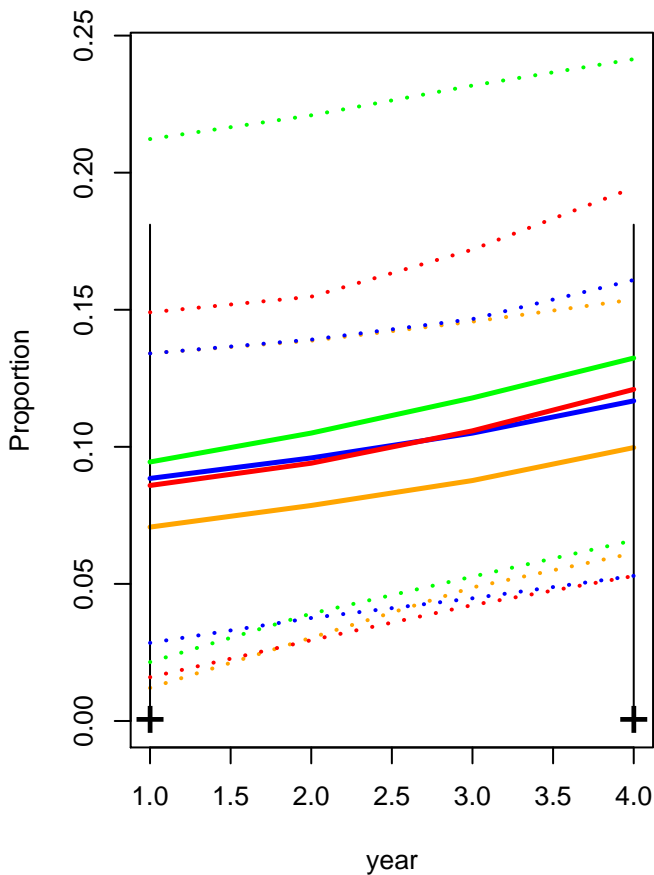

Uninfected

Site 52

Slight Infection

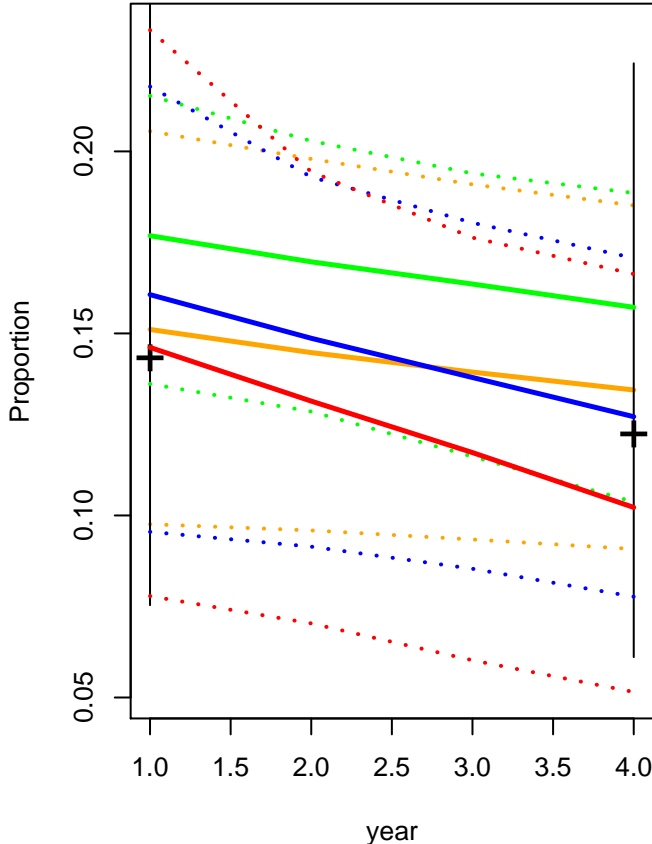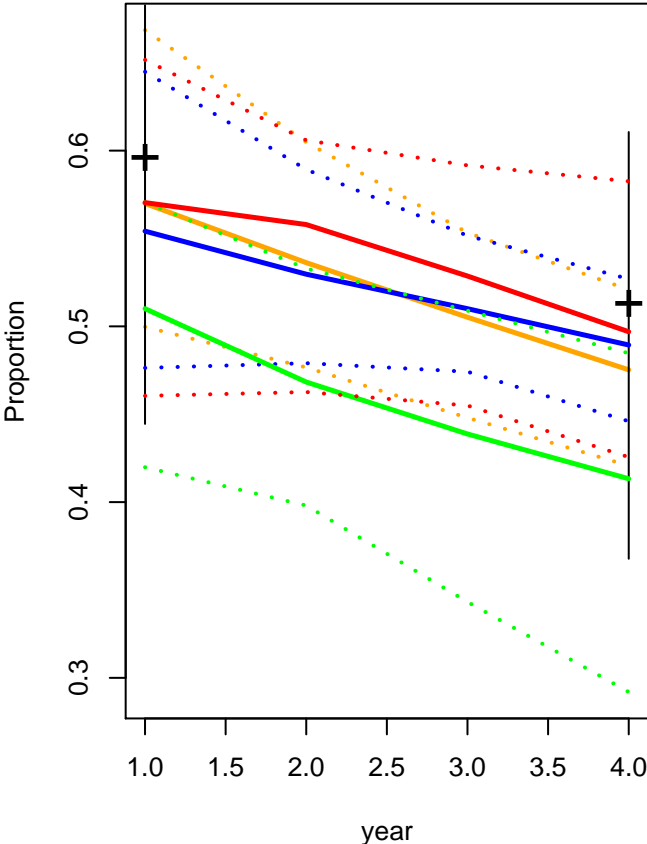

Moderate Infection

Dead

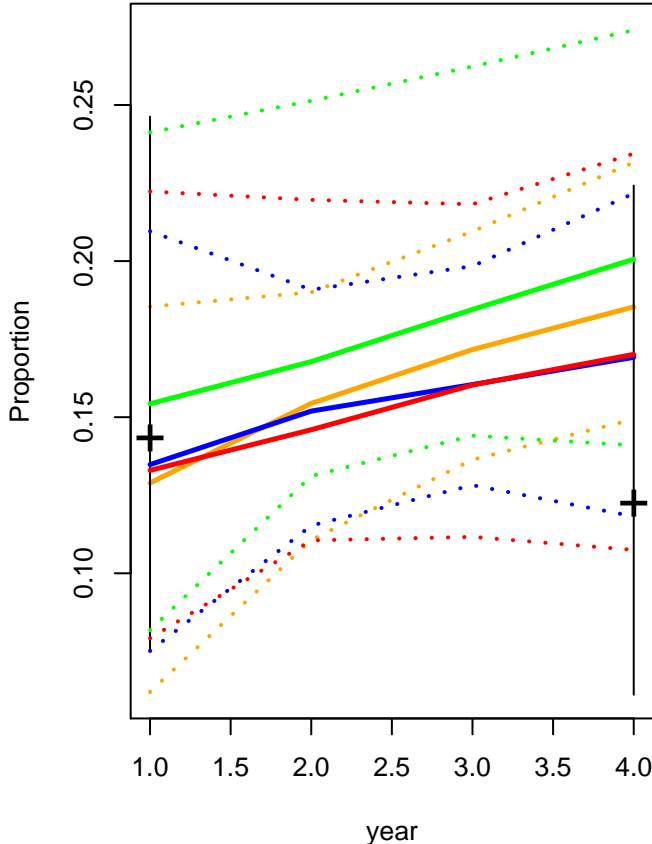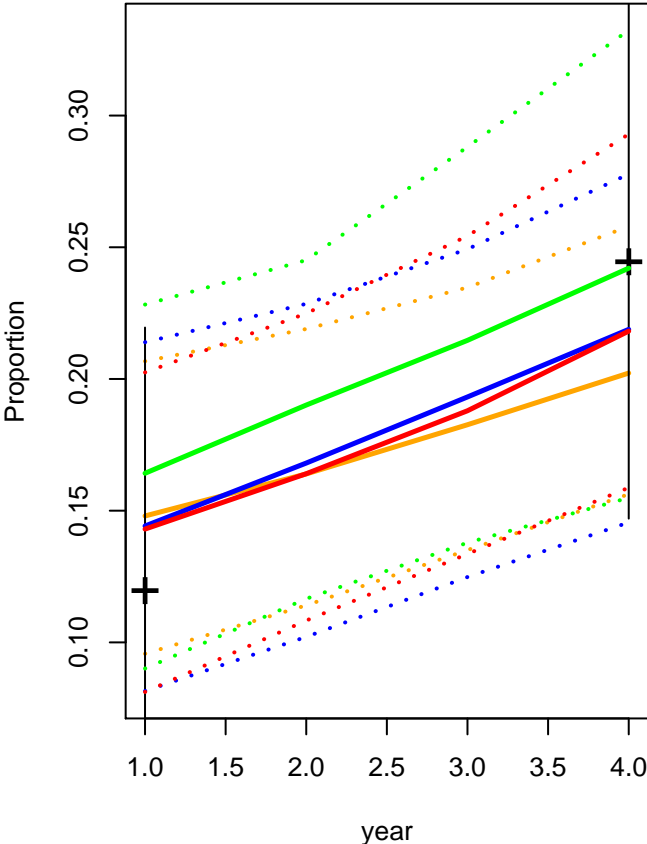

**Uninfected**

Site 53

**Slight Infection**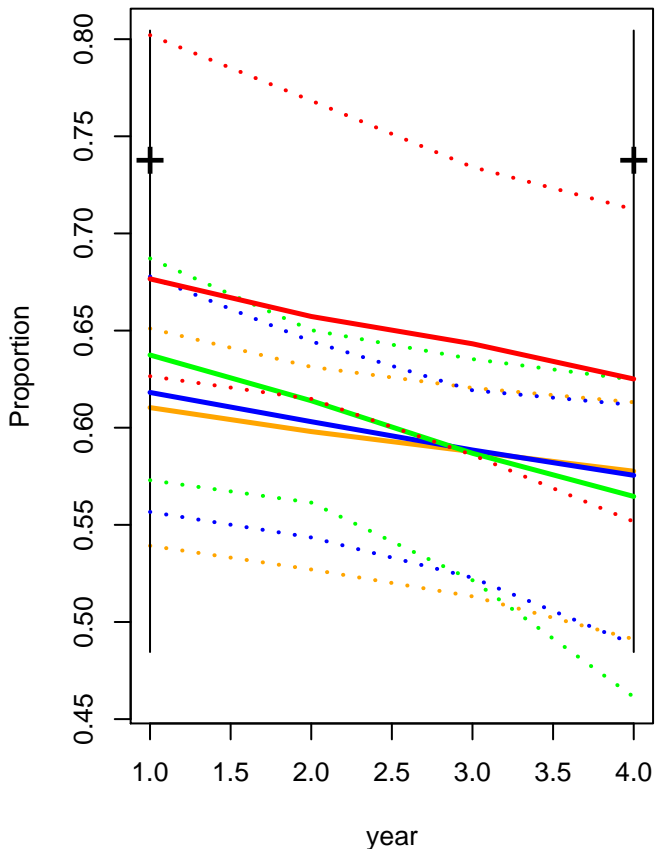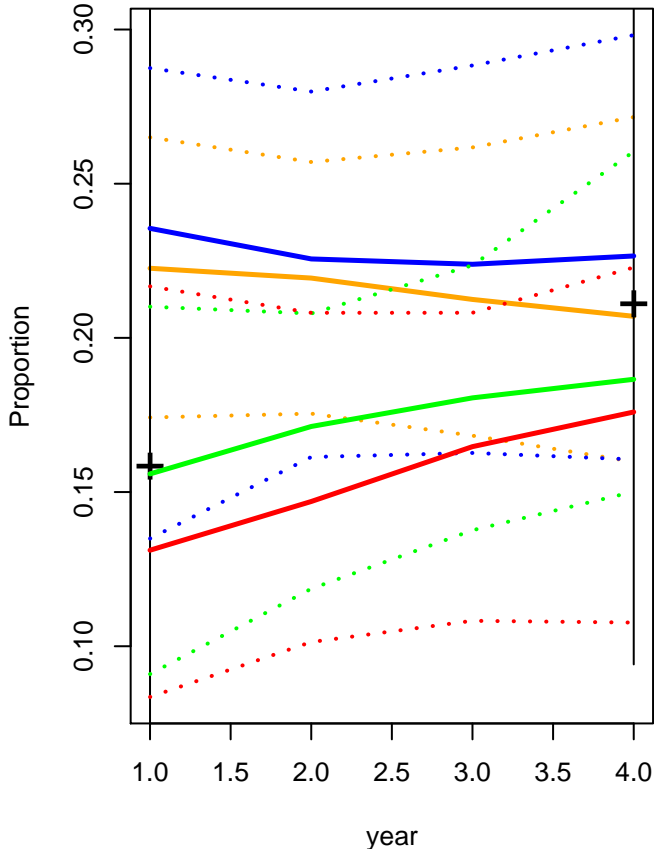**Moderate Infection****Dead**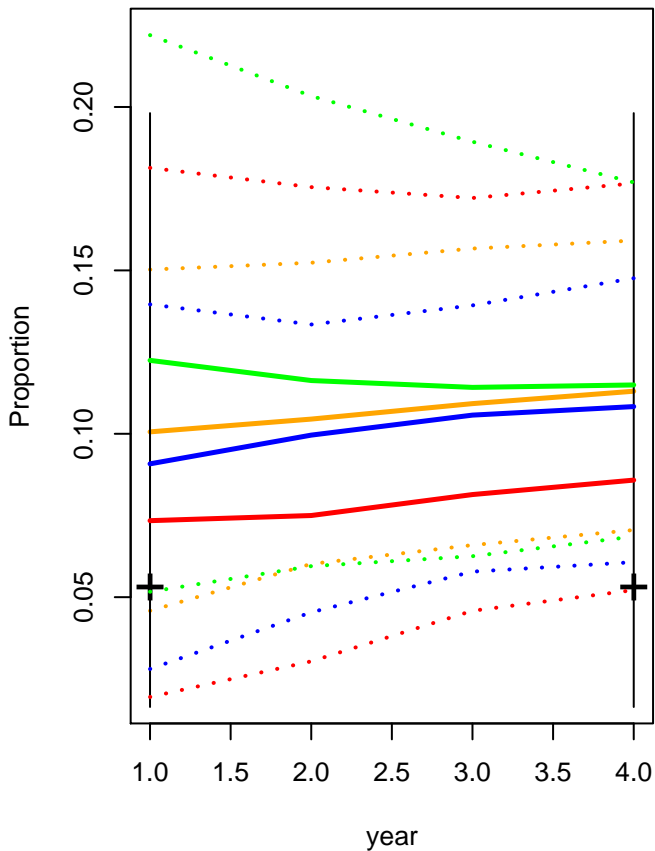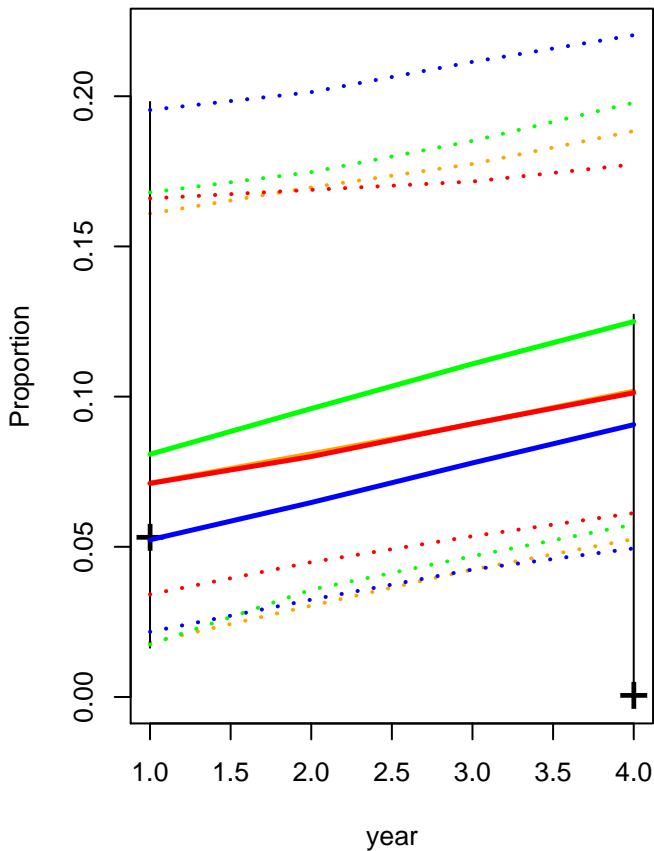

Uninfected

Site 54

Slight Infection

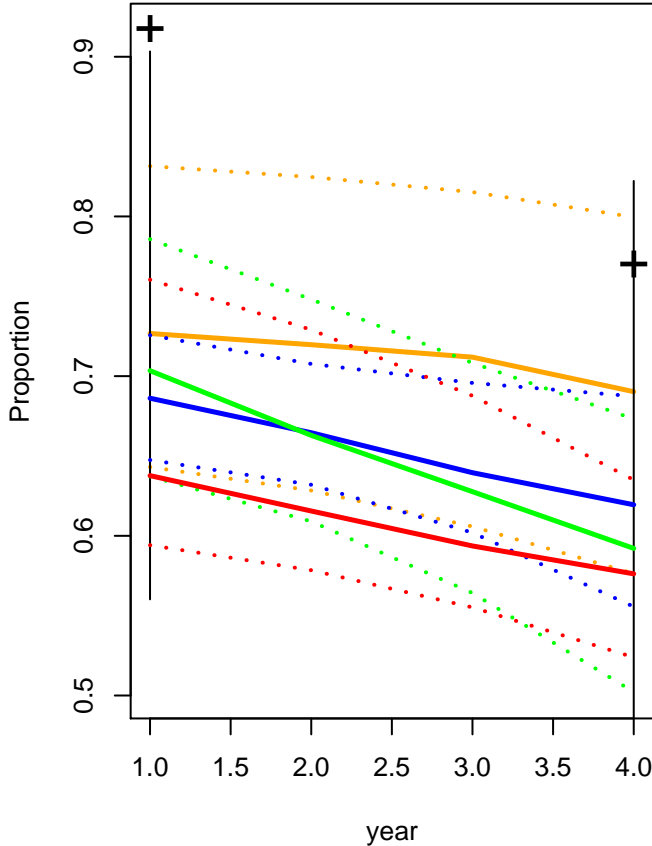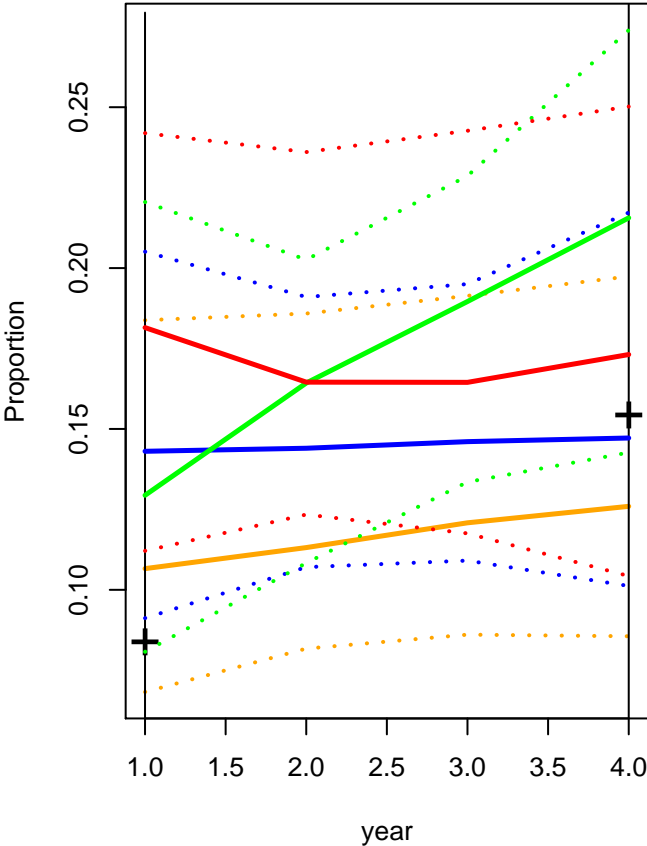

Moderate Infection

Dead

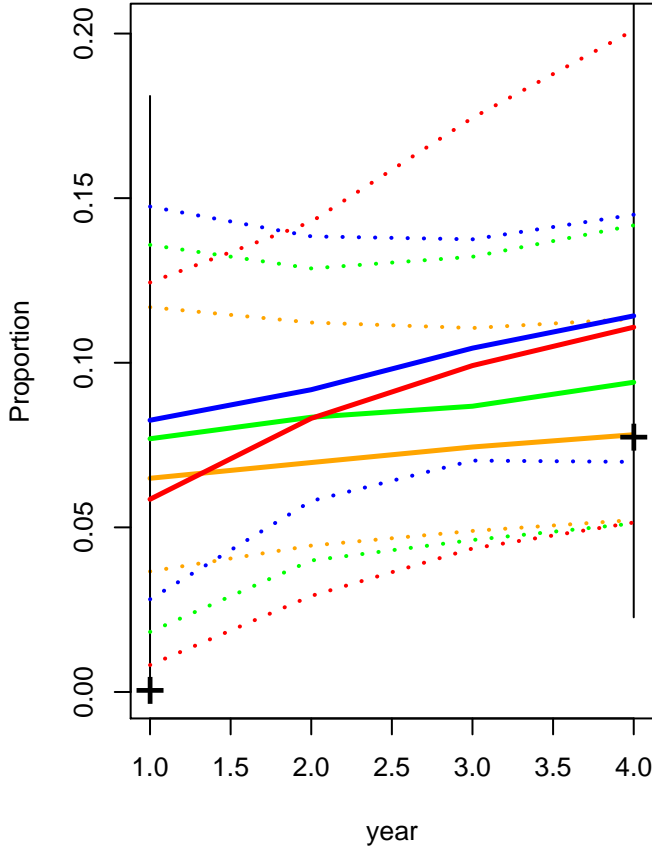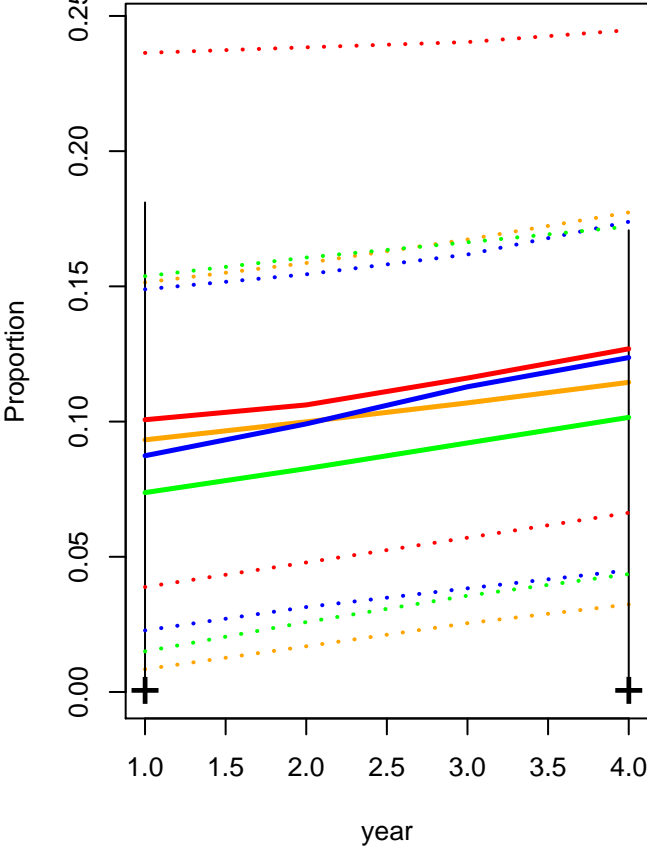



Uninfected

Site 55

Slight Infection

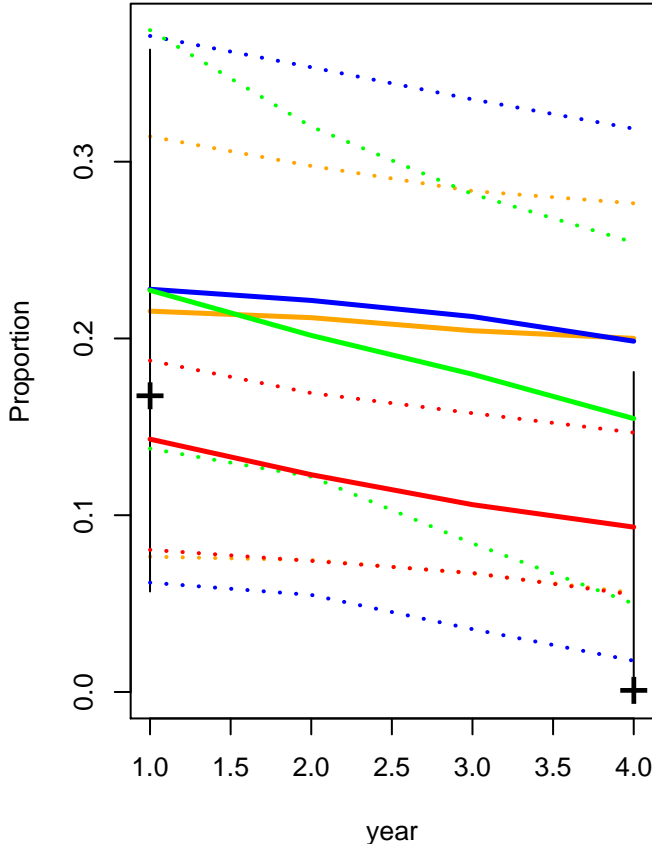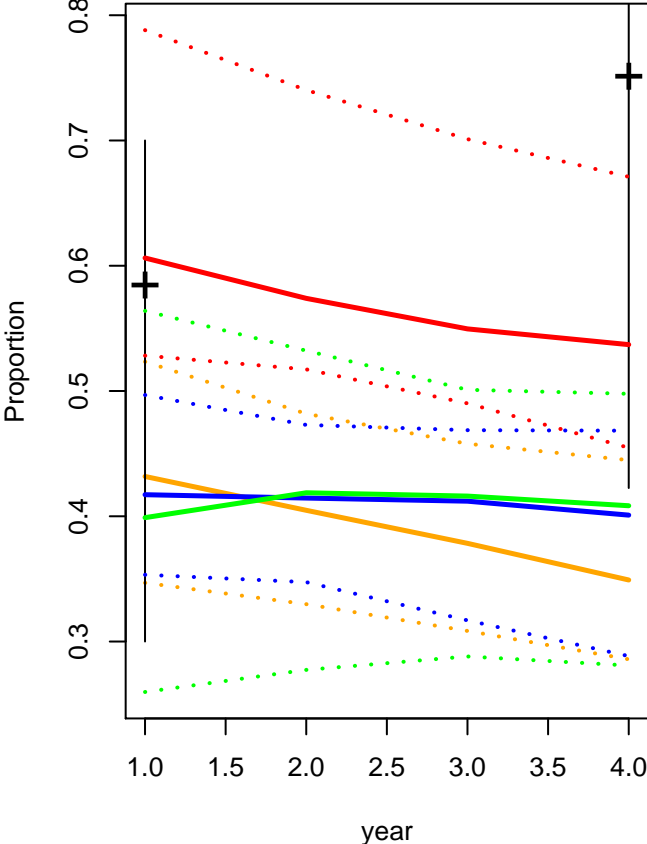

Moderate Infection

Dead

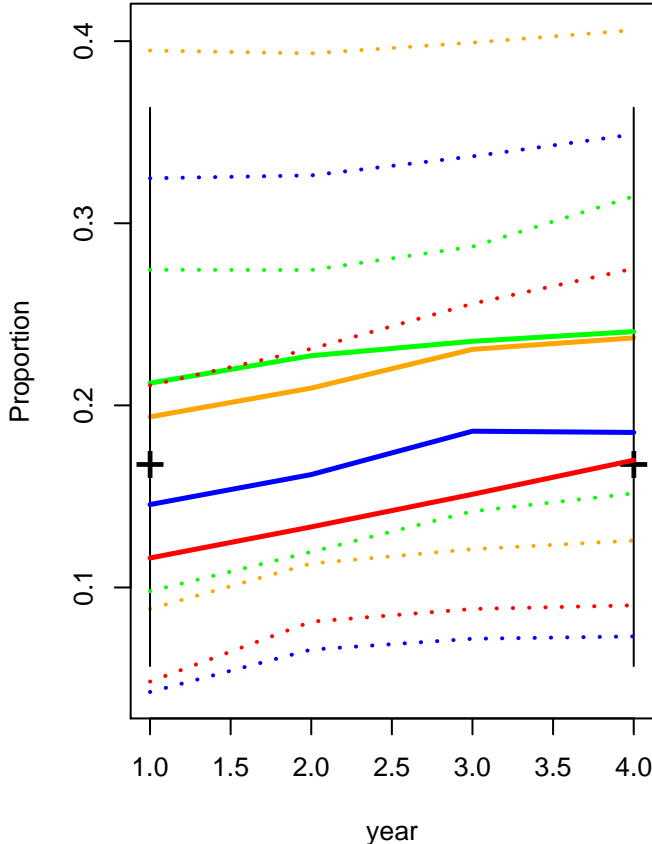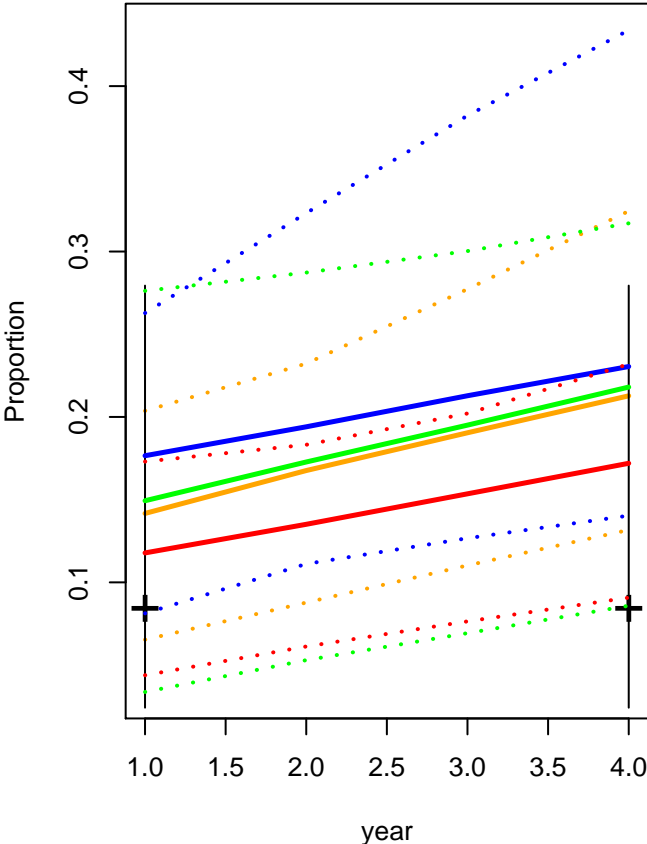

Uninfected

Site 56

Slight Infection

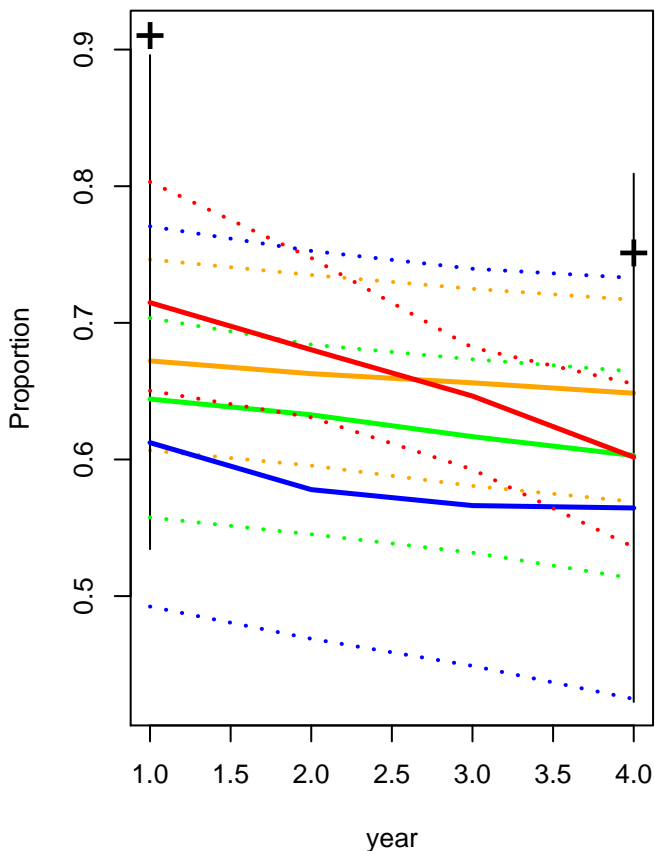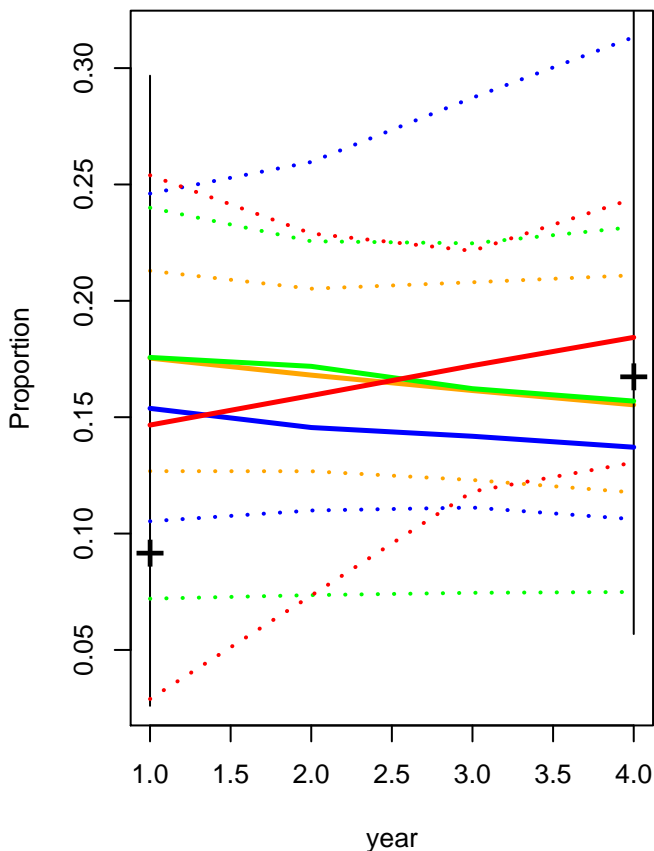

Moderate Infection

Dead

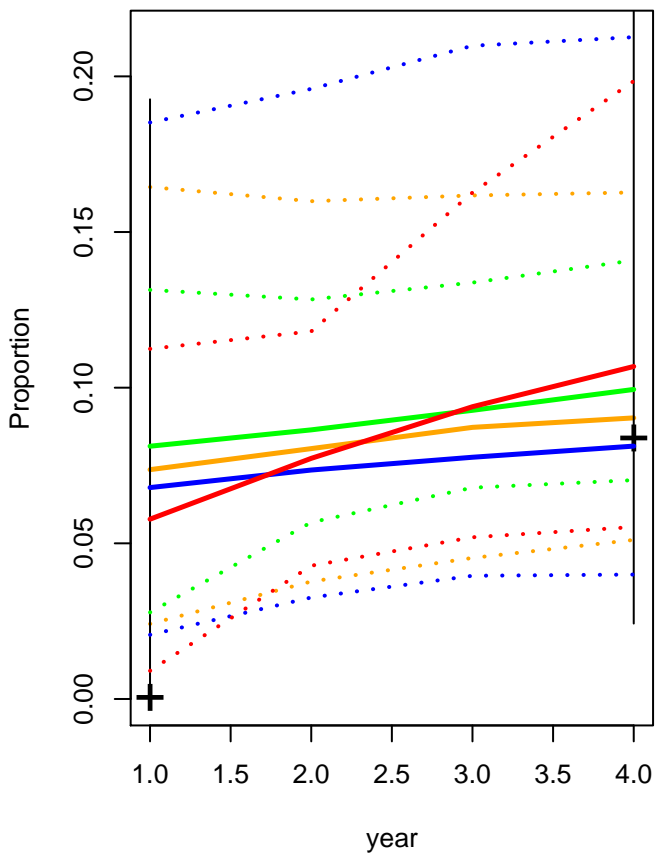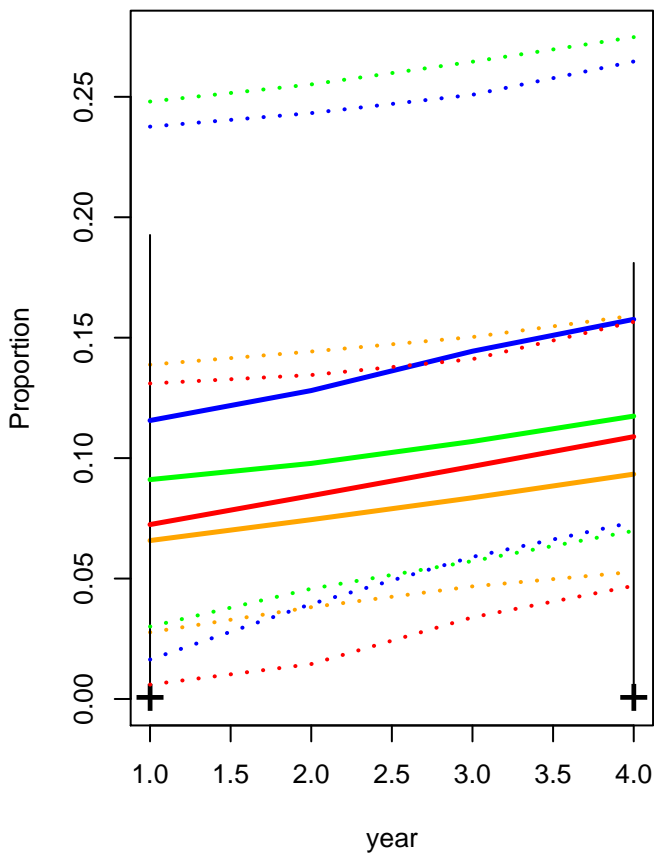

Uninfected

Site 57

Slight Infection

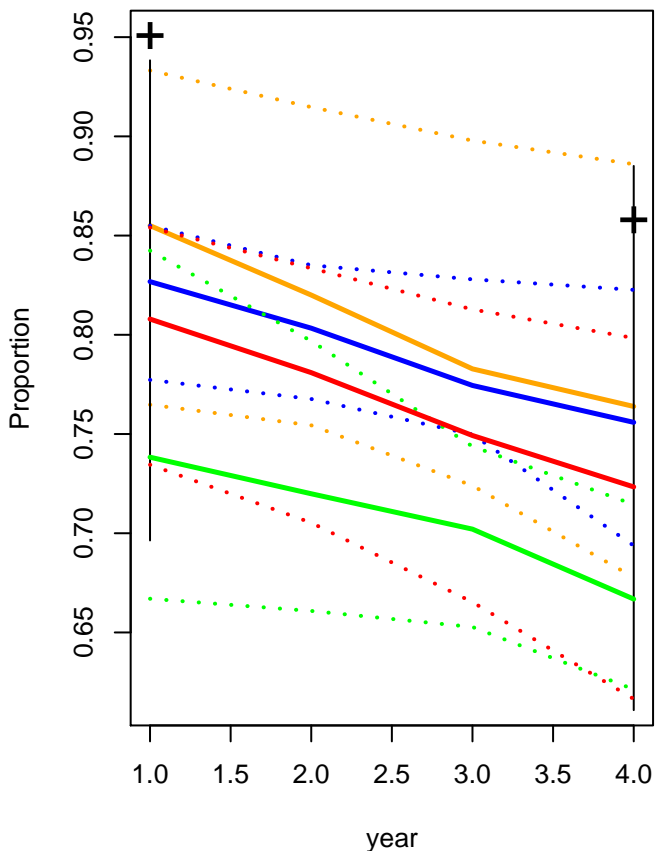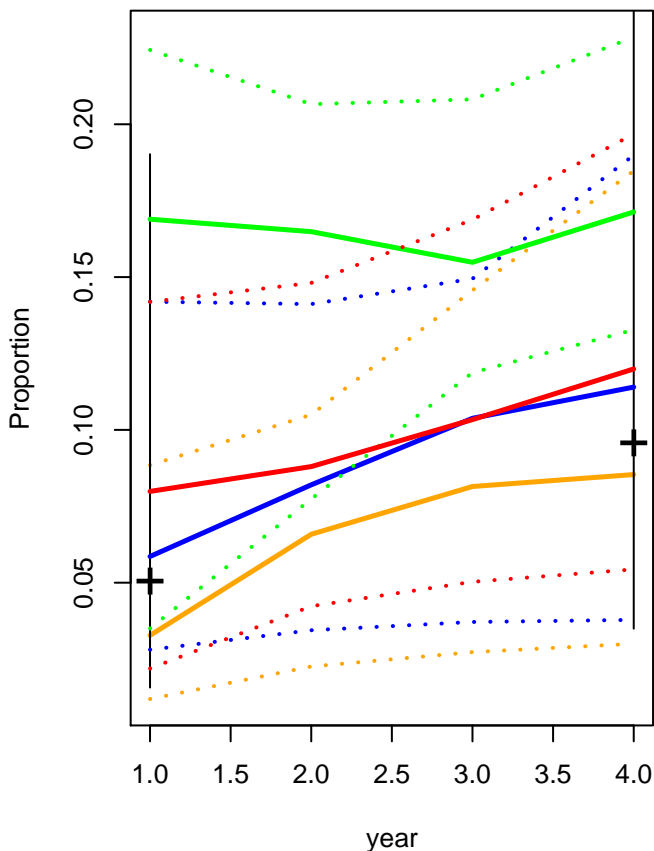

Moderate Infection

Dead

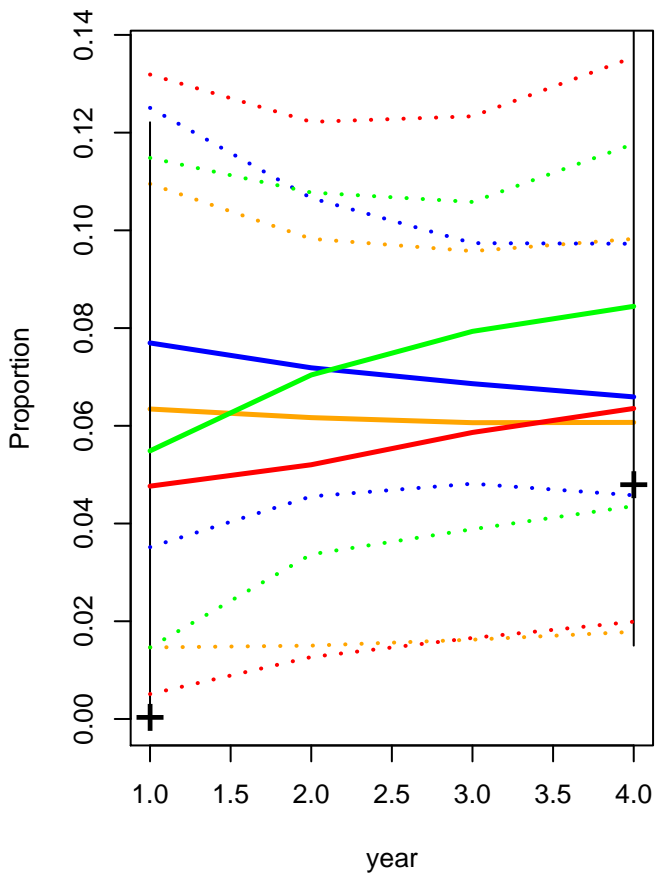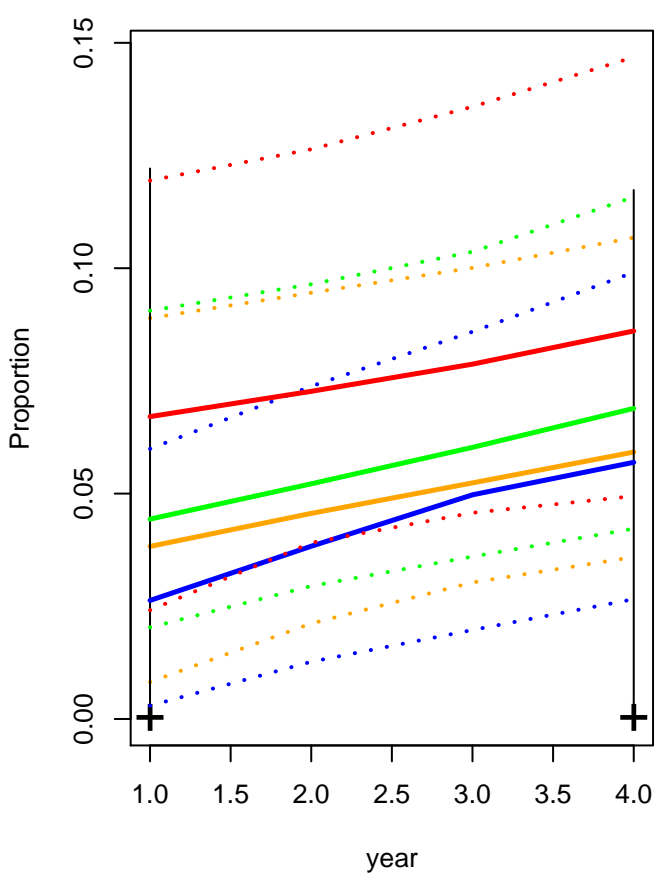

Uninfected

Site 58

Slight Infection

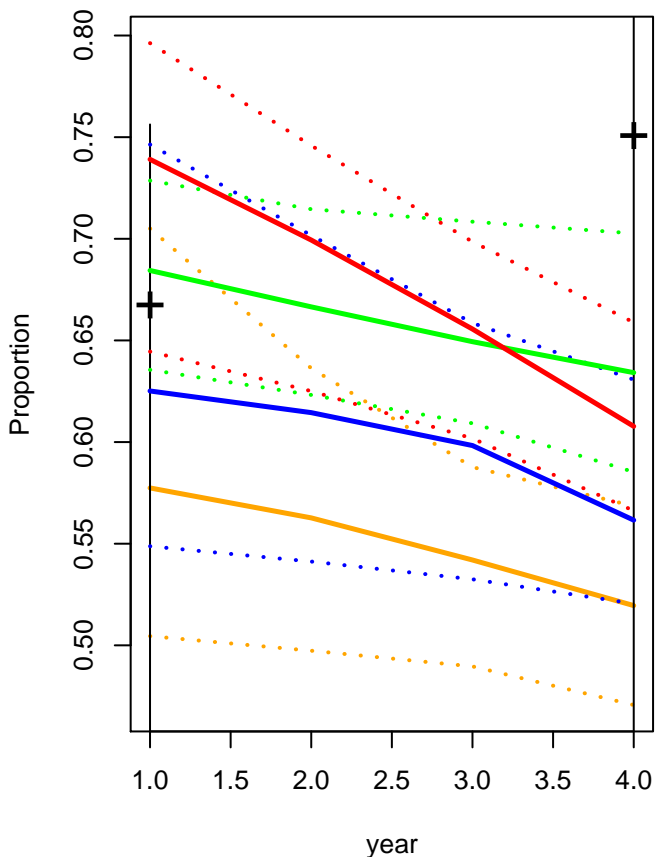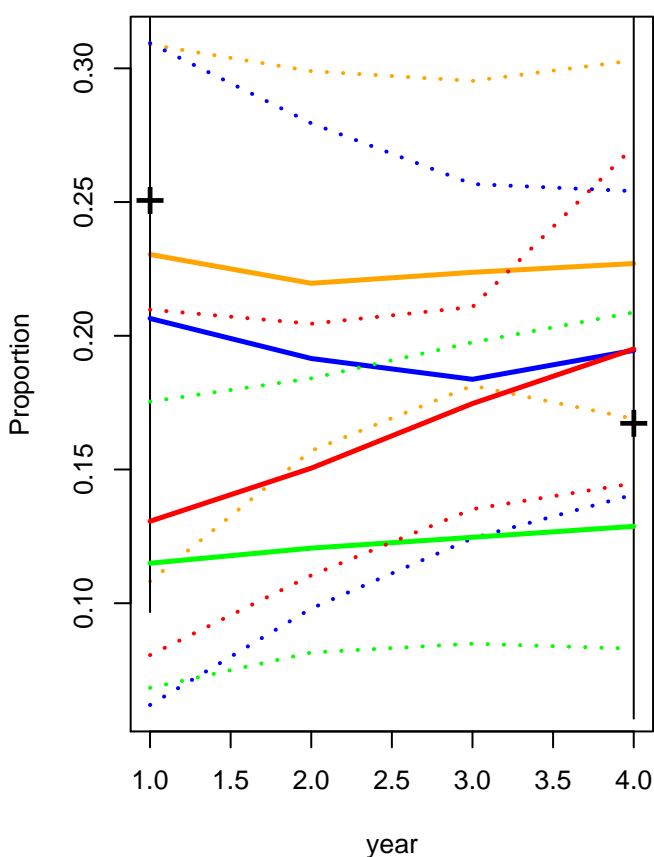

Moderate Infection

Dead

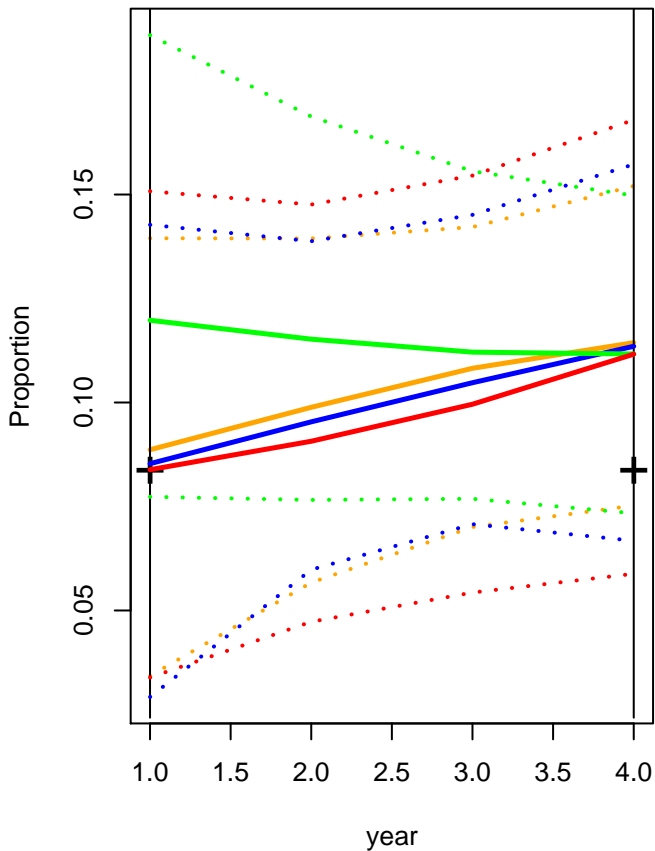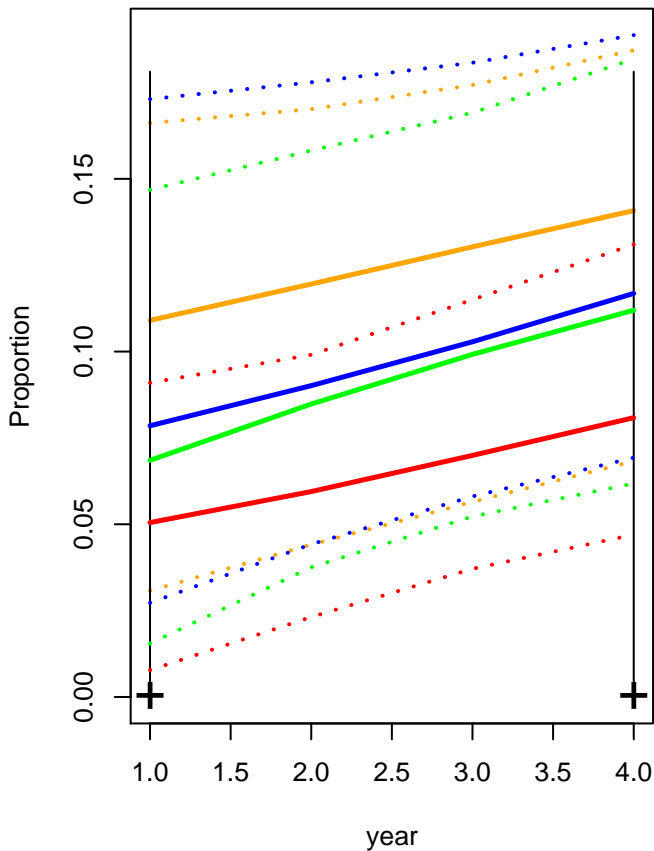

Uninfected

Site 59

Slight Infection

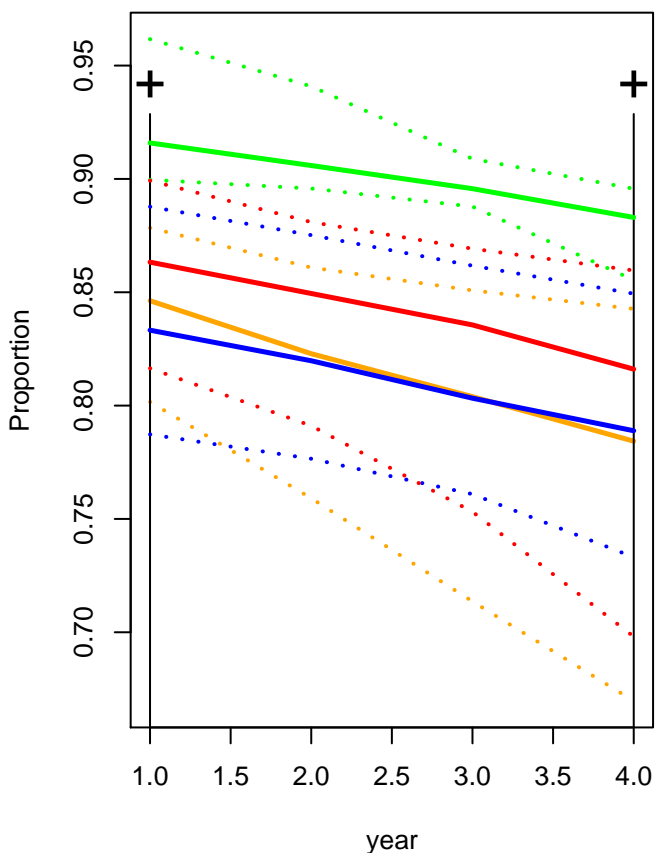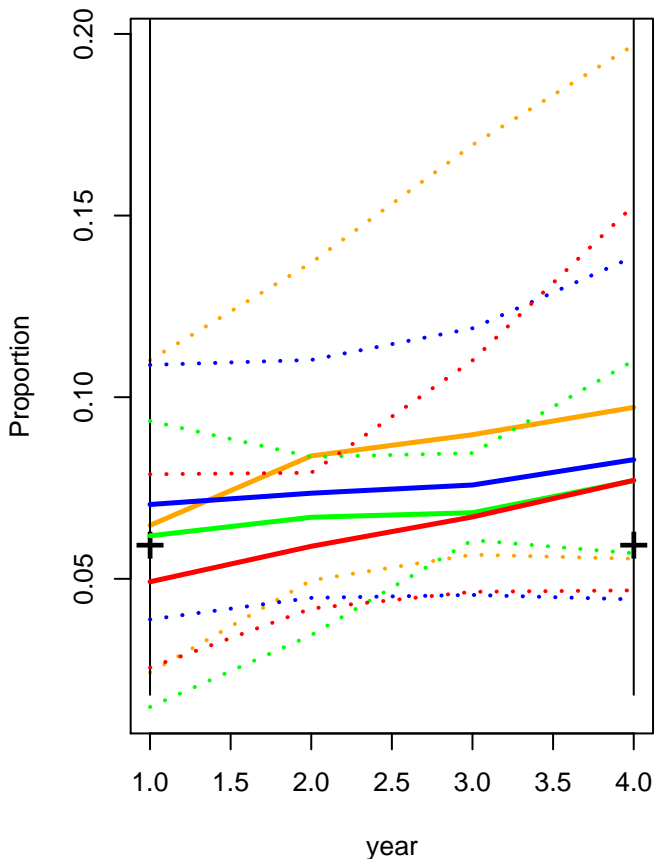

Moderate Infection

Dead

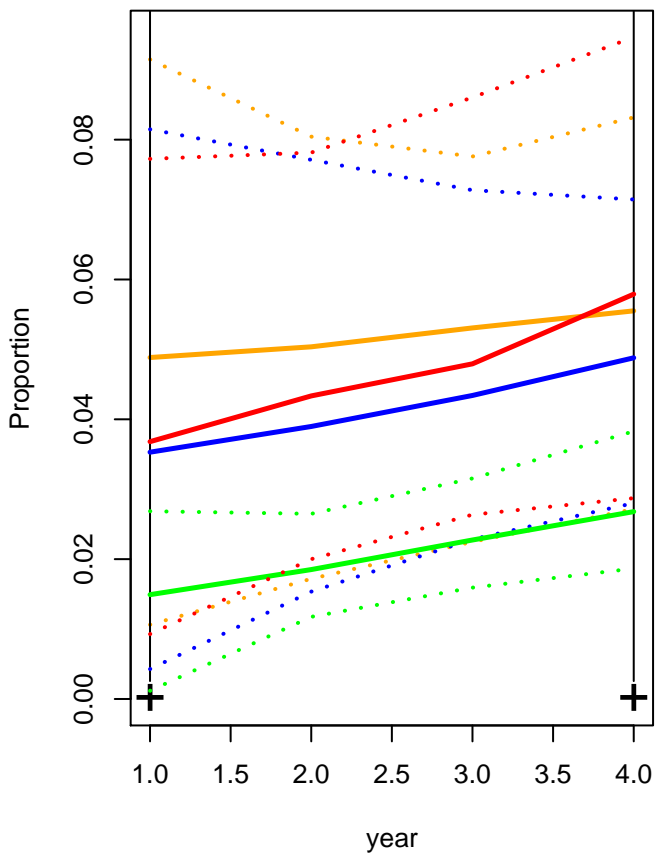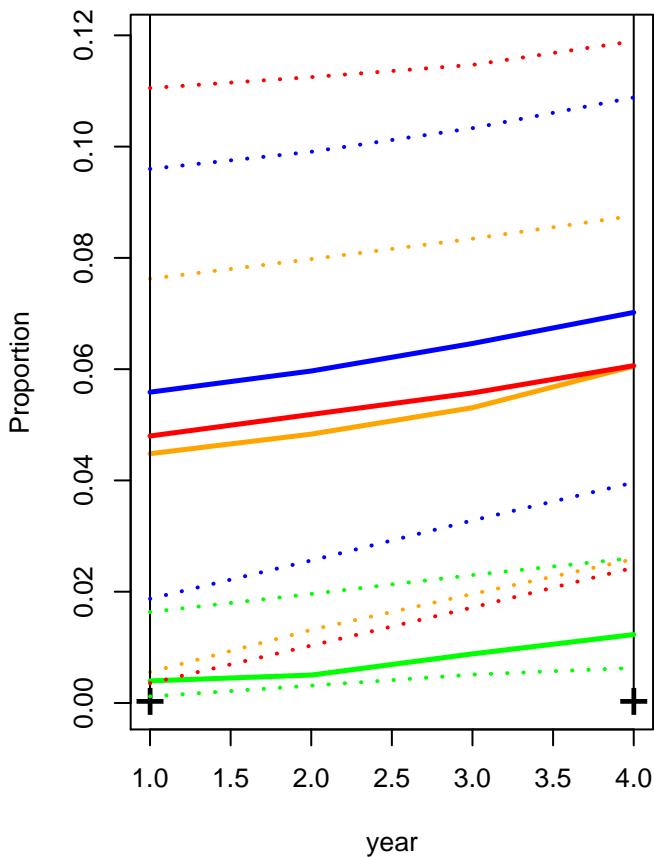

Uninfected

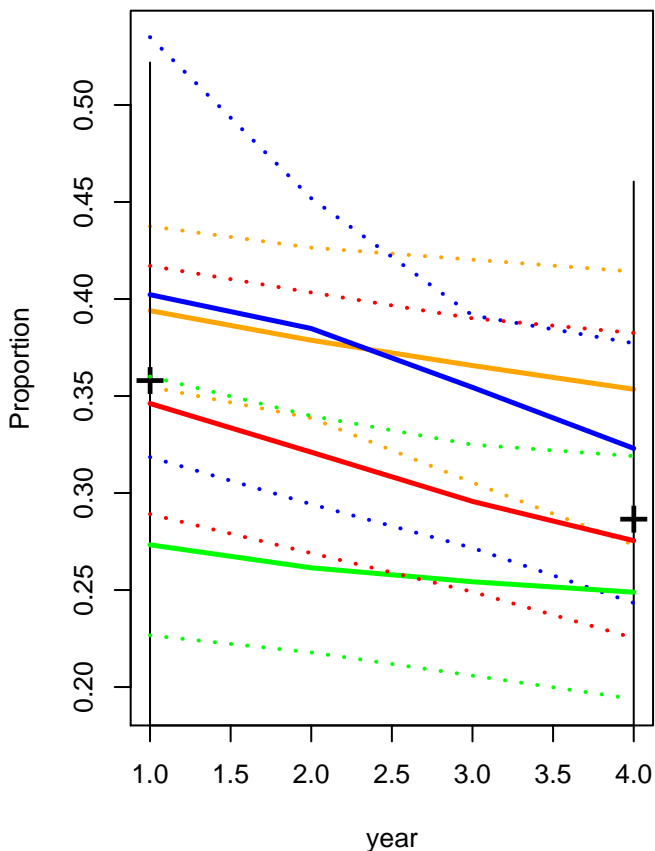

Site 60

Slight Infection

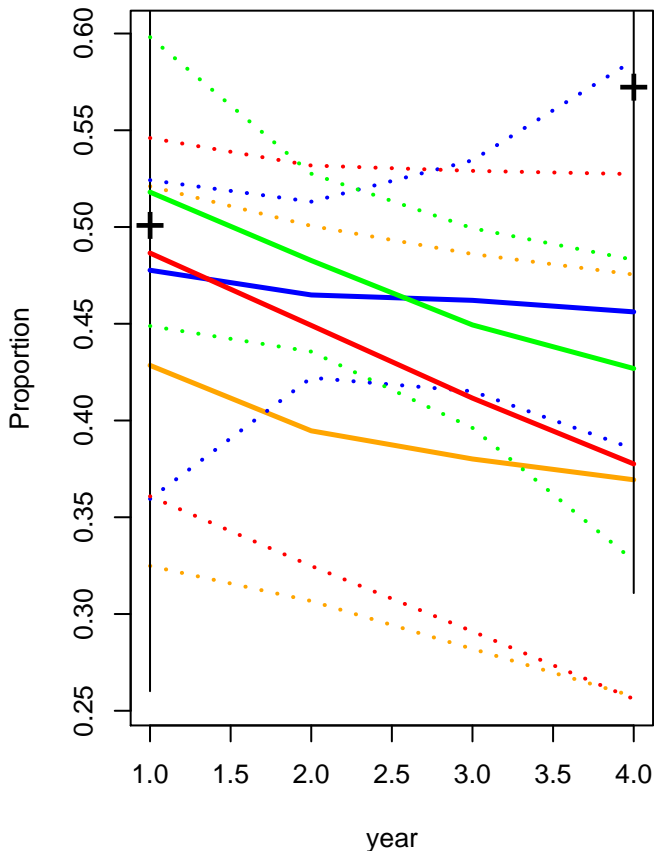

Moderate Infection

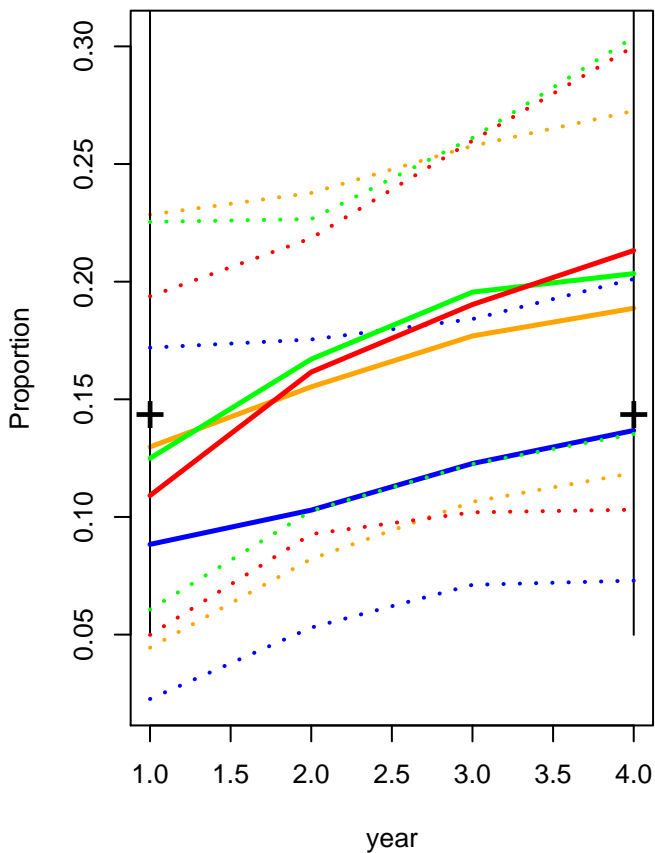

Dead

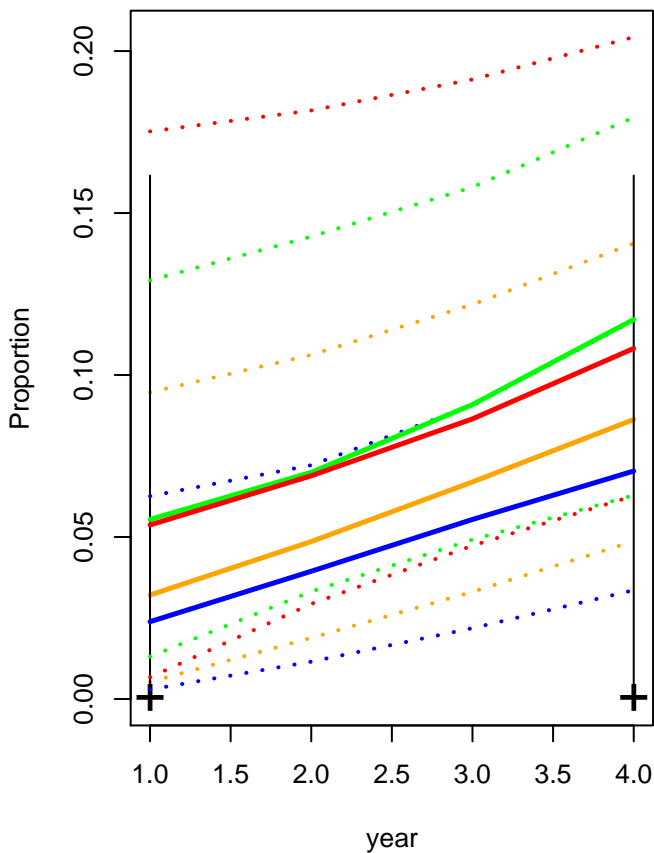

Uninfected

Site 61

Slight Infection

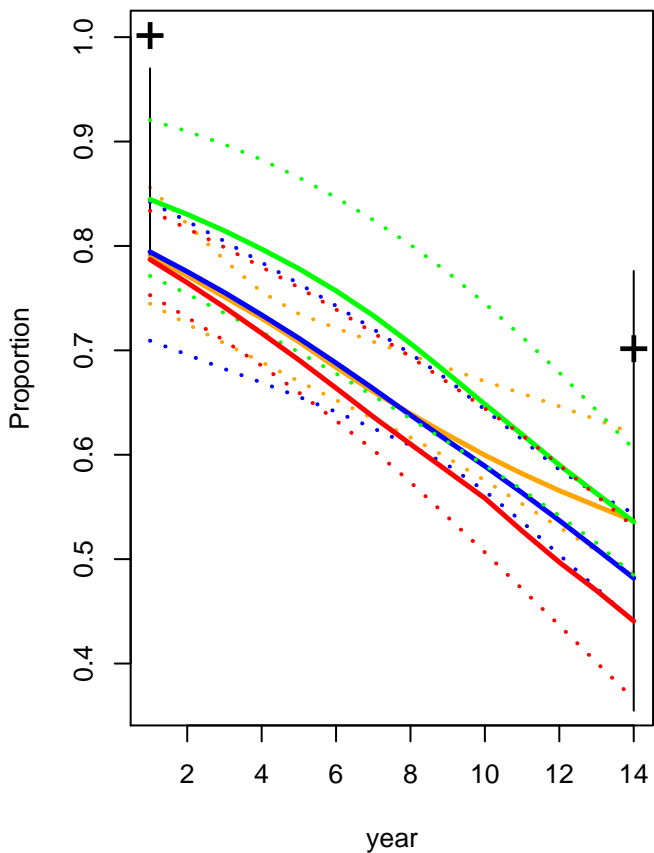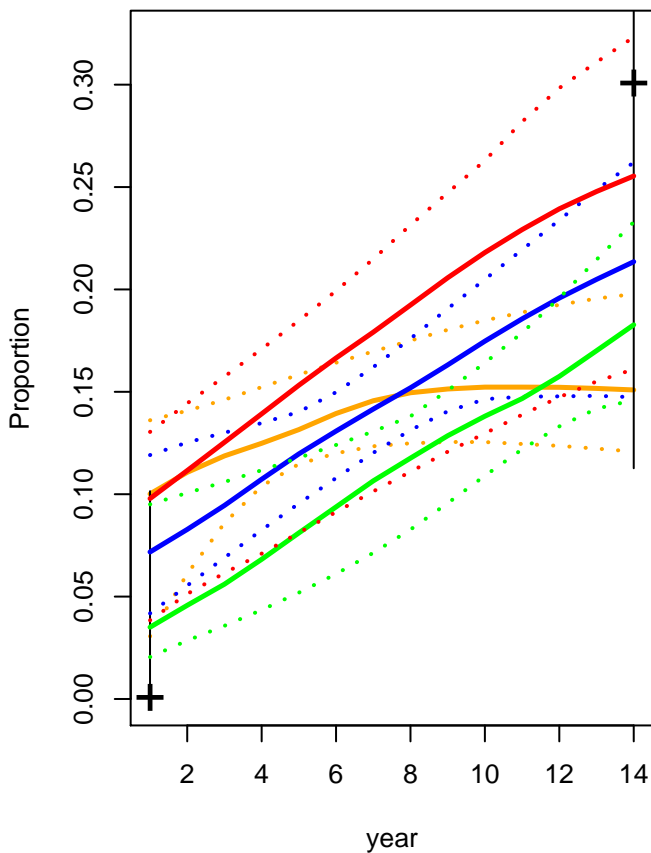

Moderate Infection

Dead

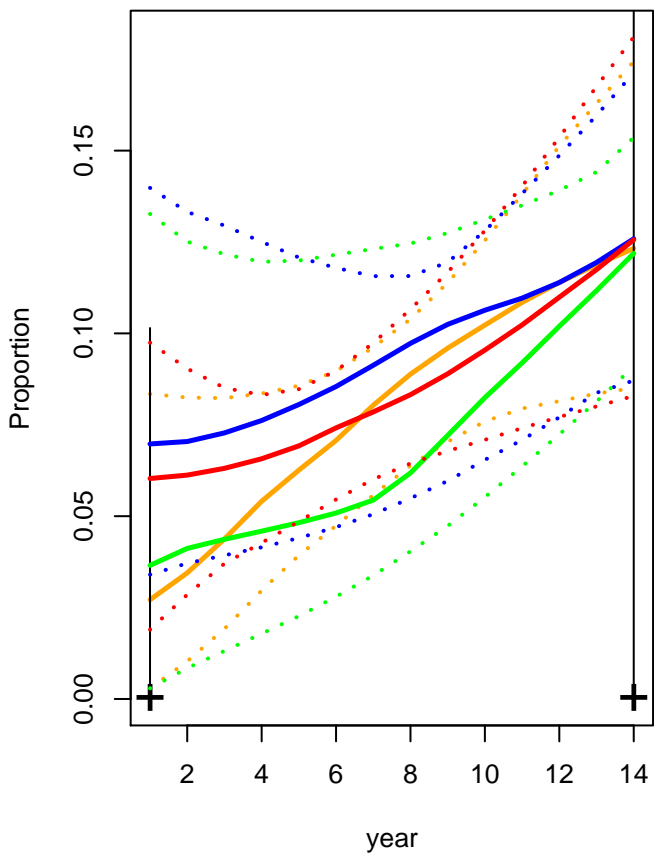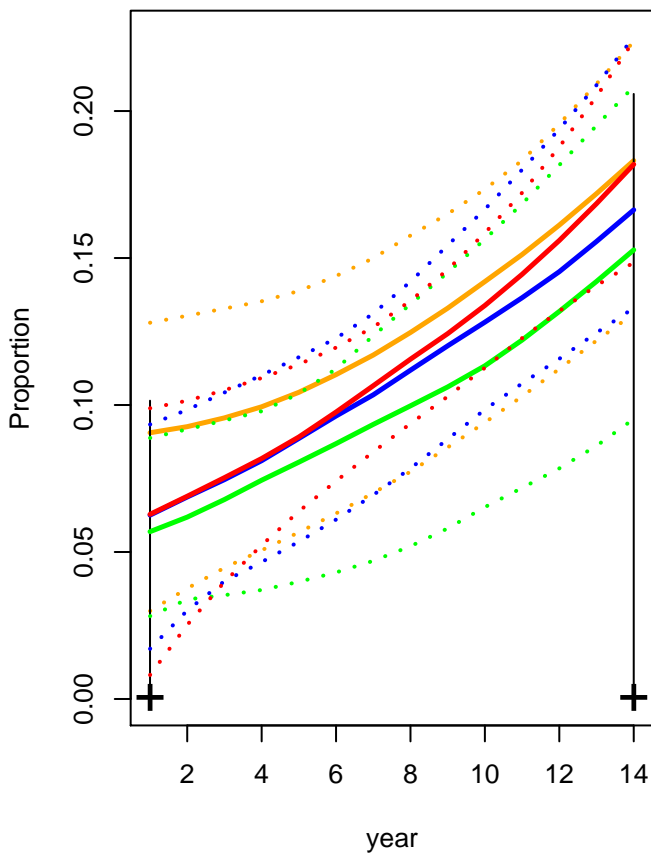

Uninfected

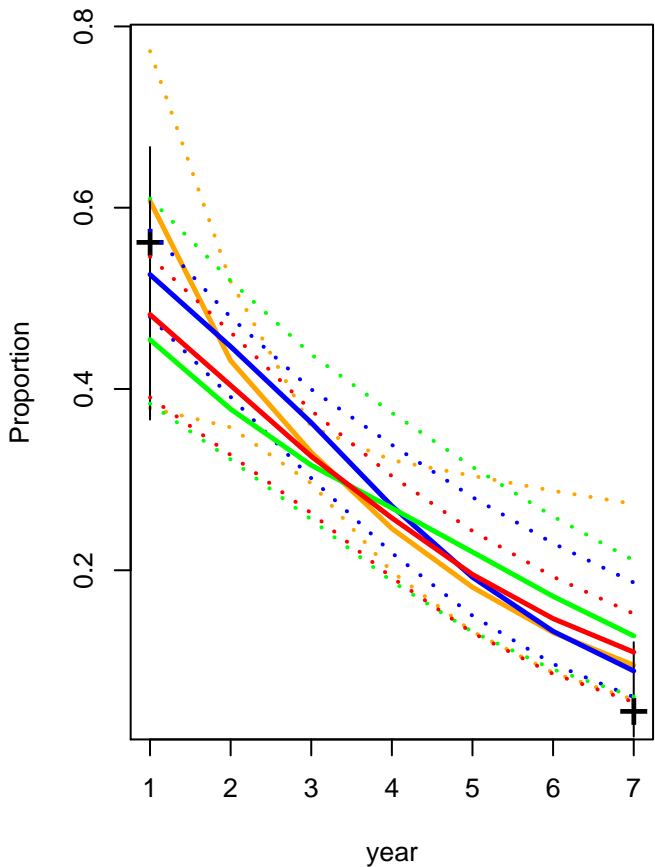

Site 62

Slight Infection

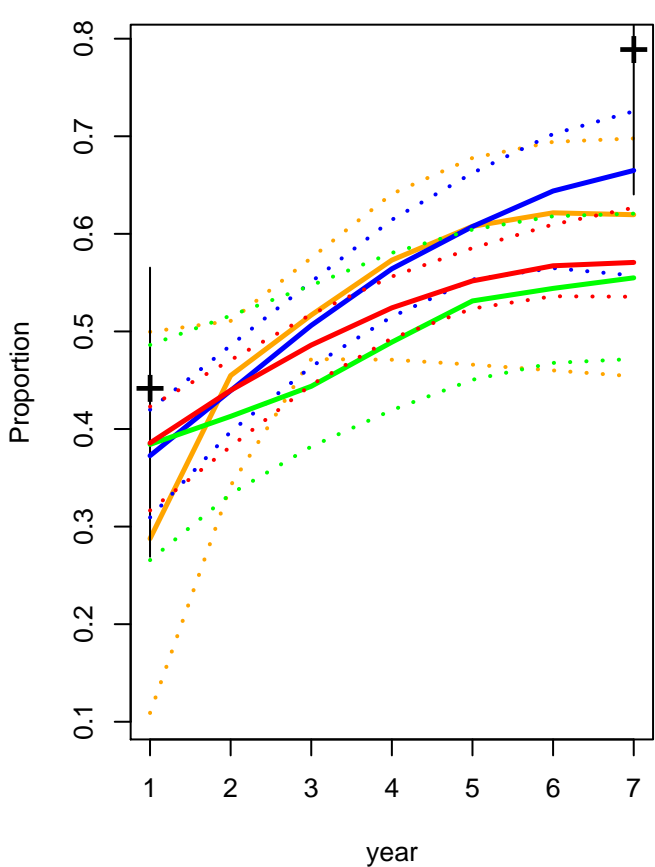

Moderate Infection

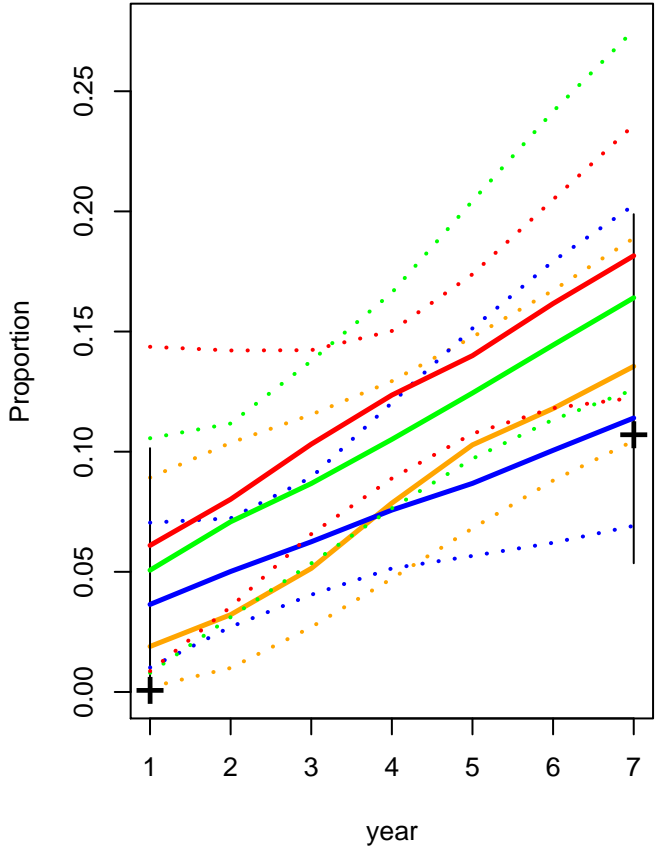

Dead

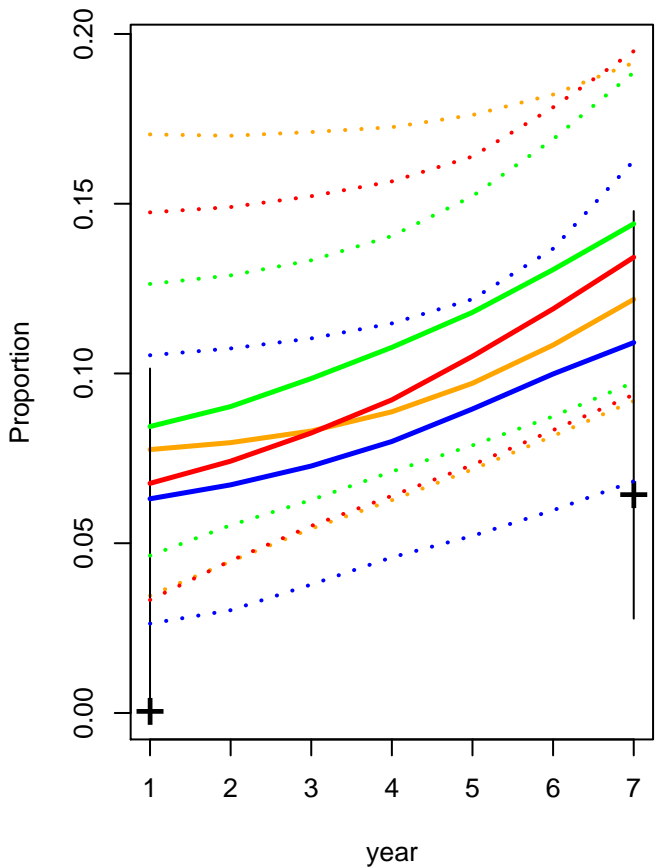



Uninfected

Site 63

Slight Infection

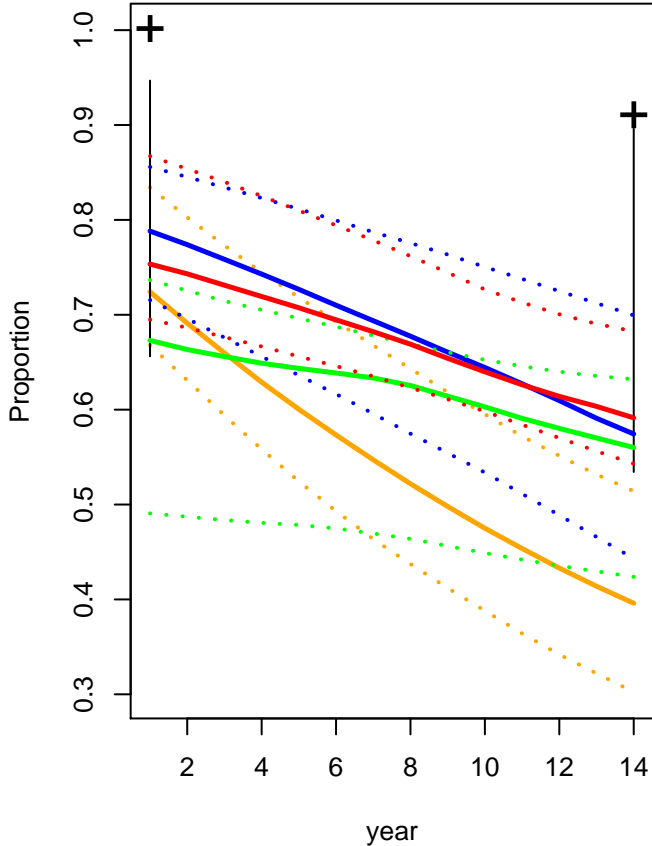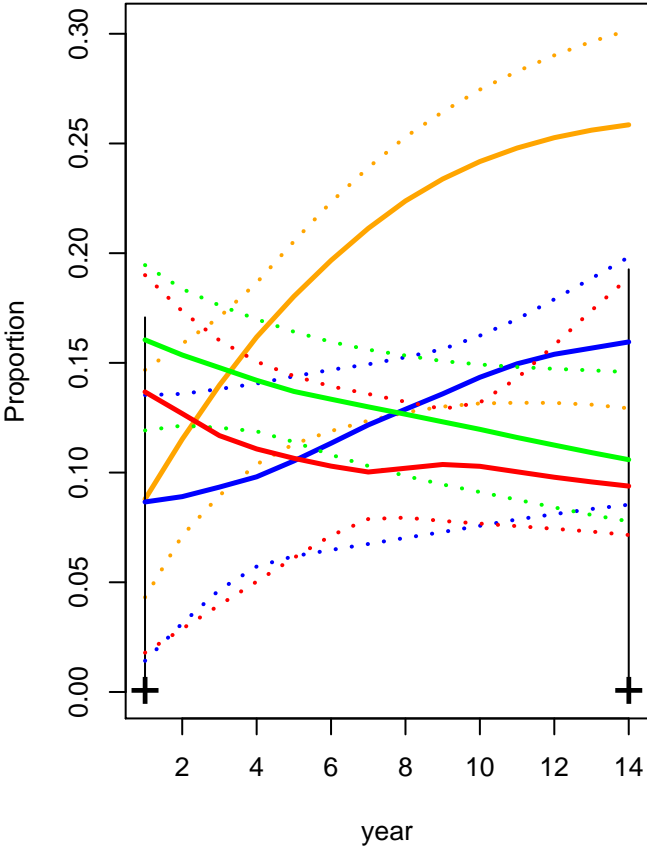

Moderate Infection

Dead

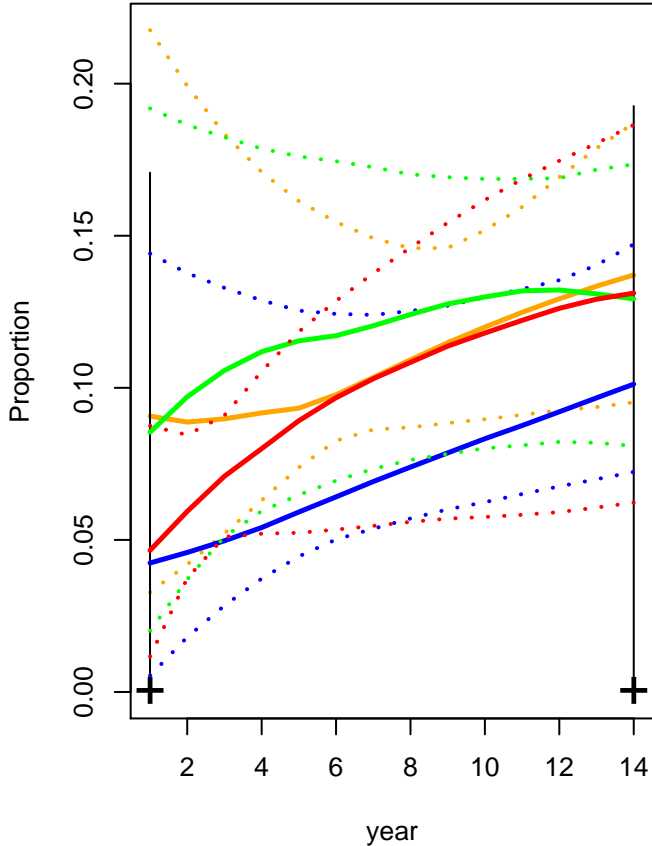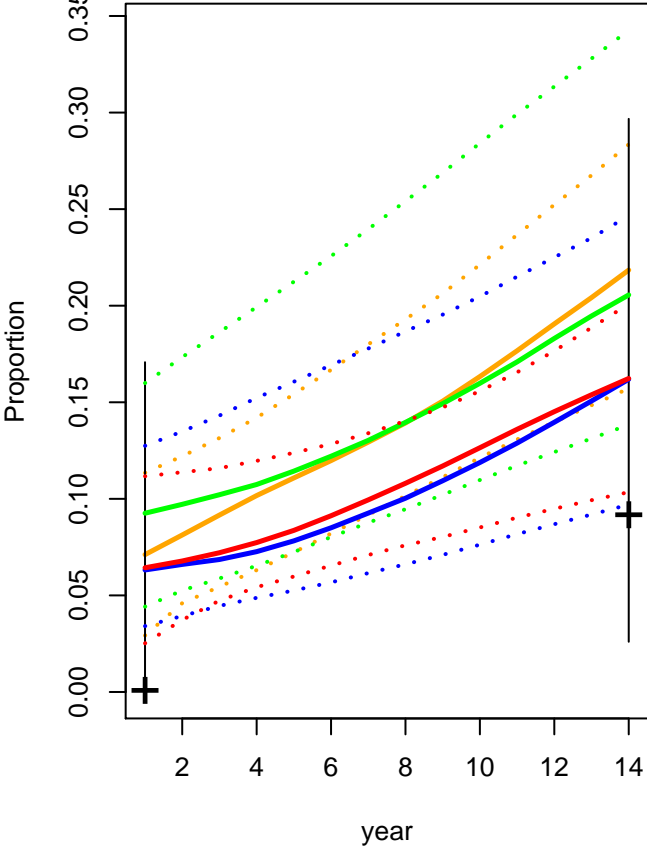

Uninfected

Site 64

Slight Infection

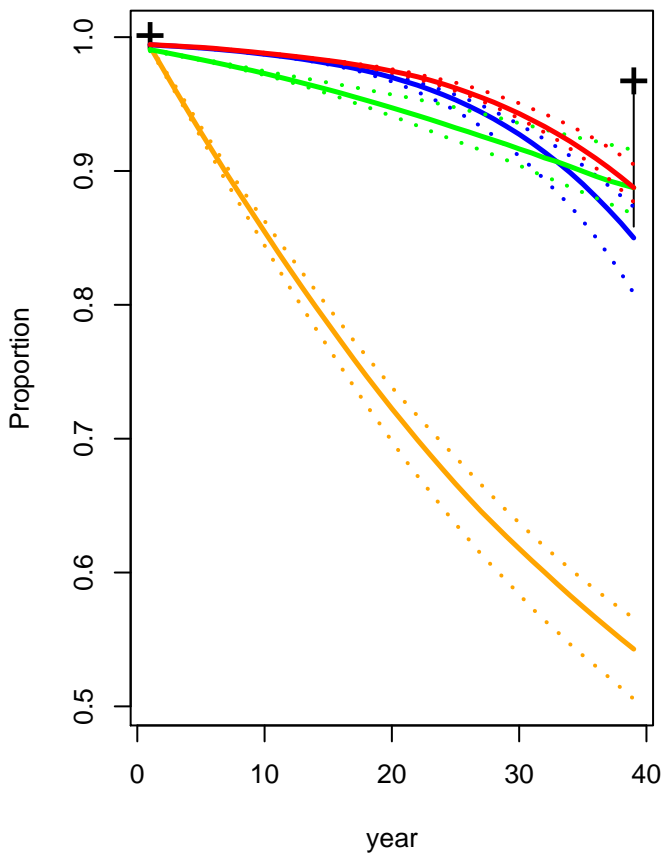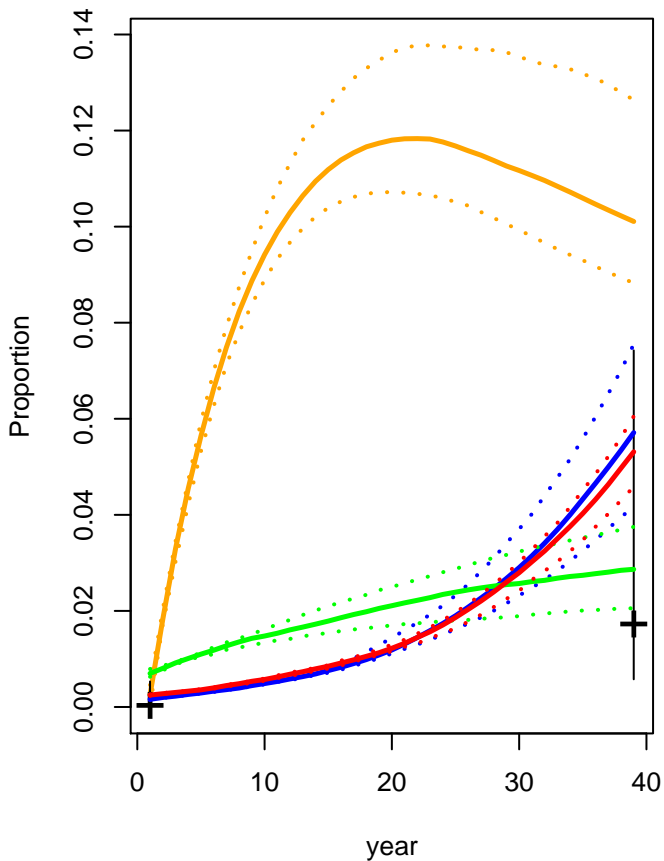

Moderate Infection

Dead

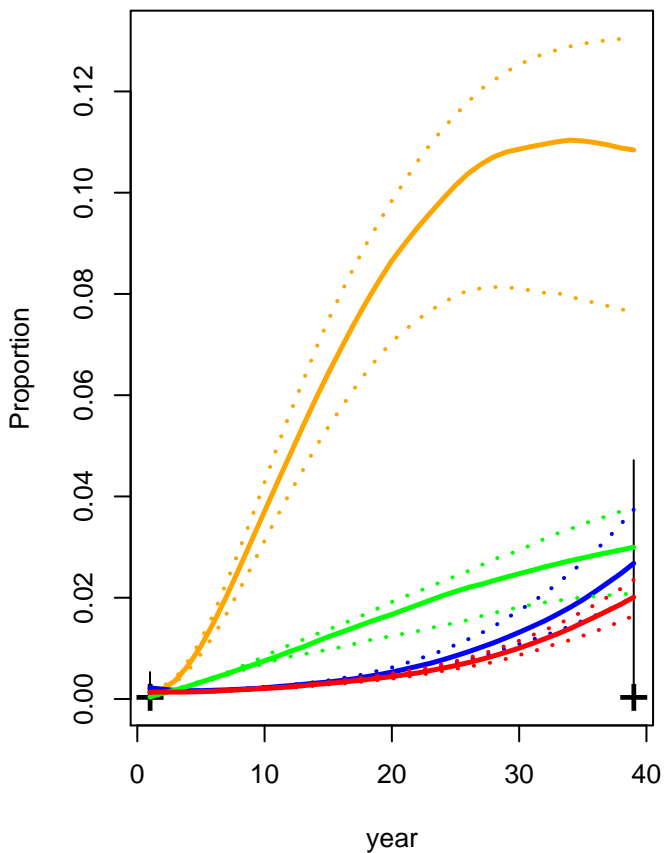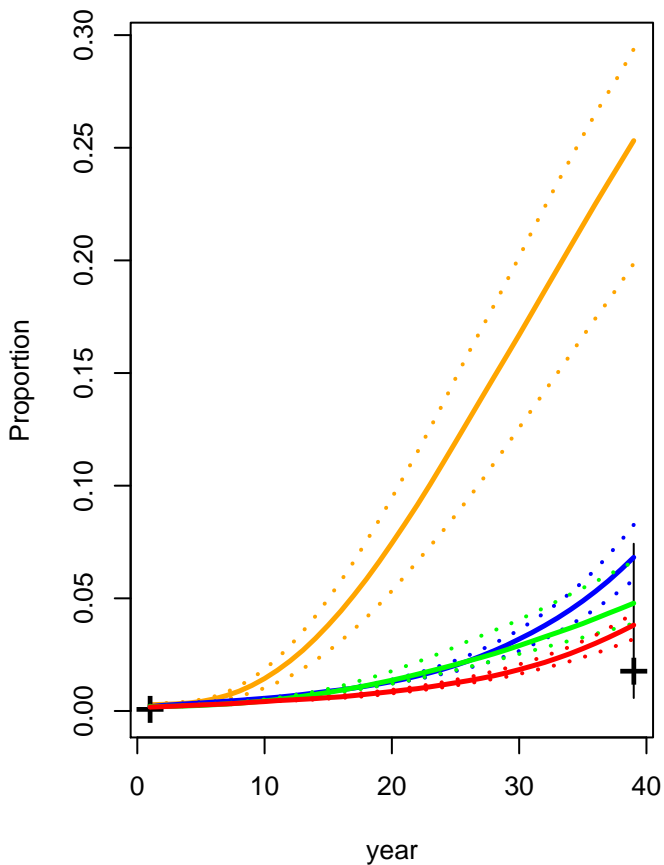

Uninfected

Site 65

Slight Infection

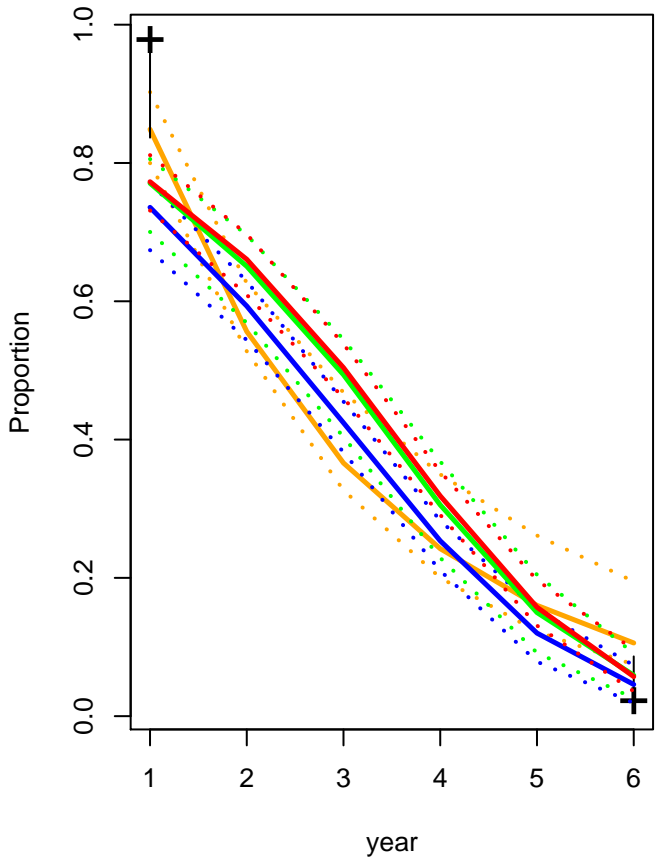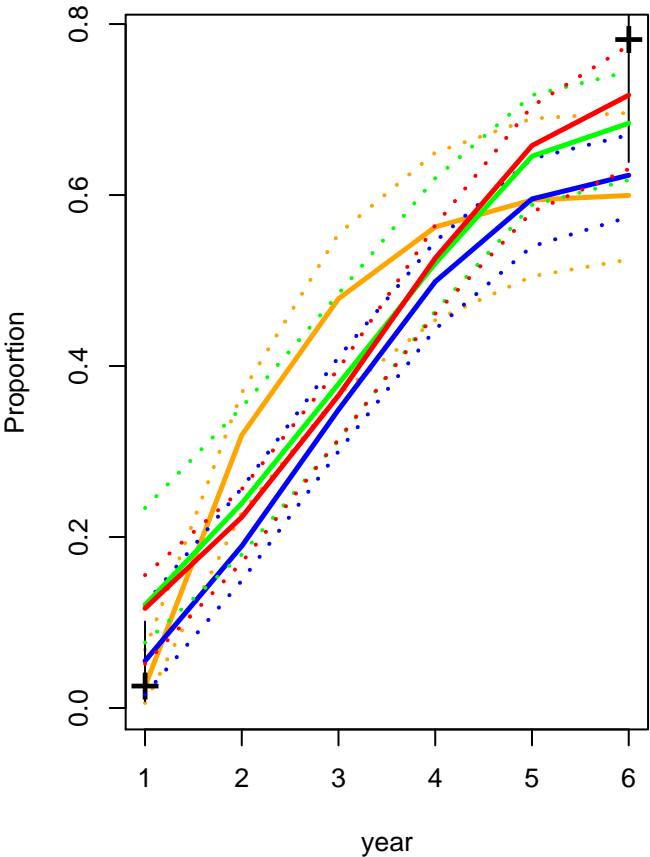

Moderate Infection

Dead

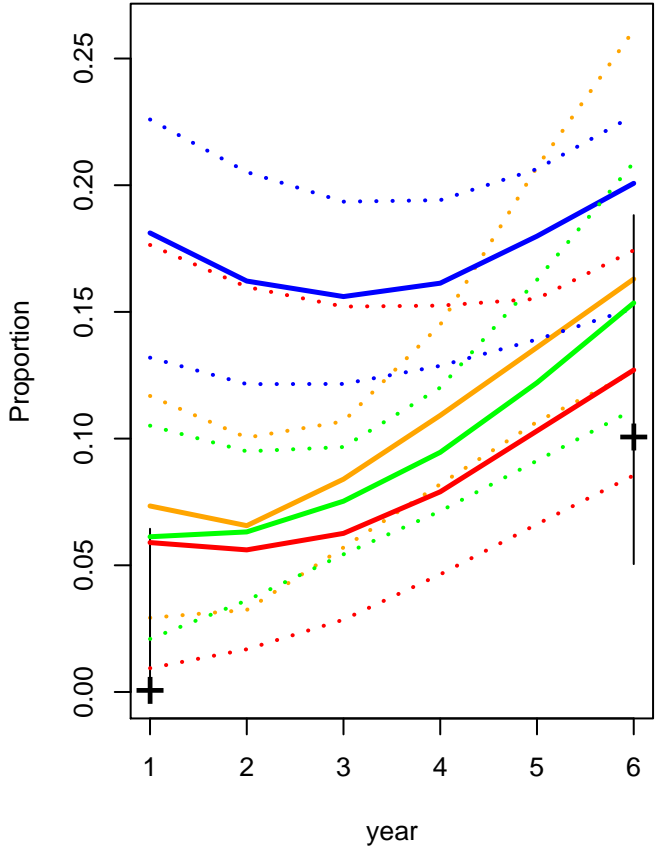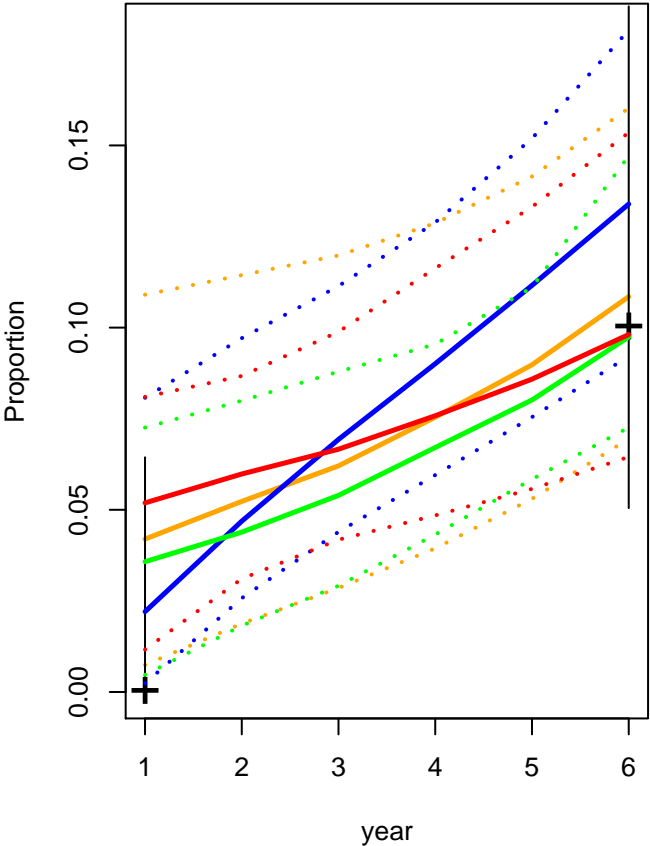

Uninfected

Site 66

Slight Infection

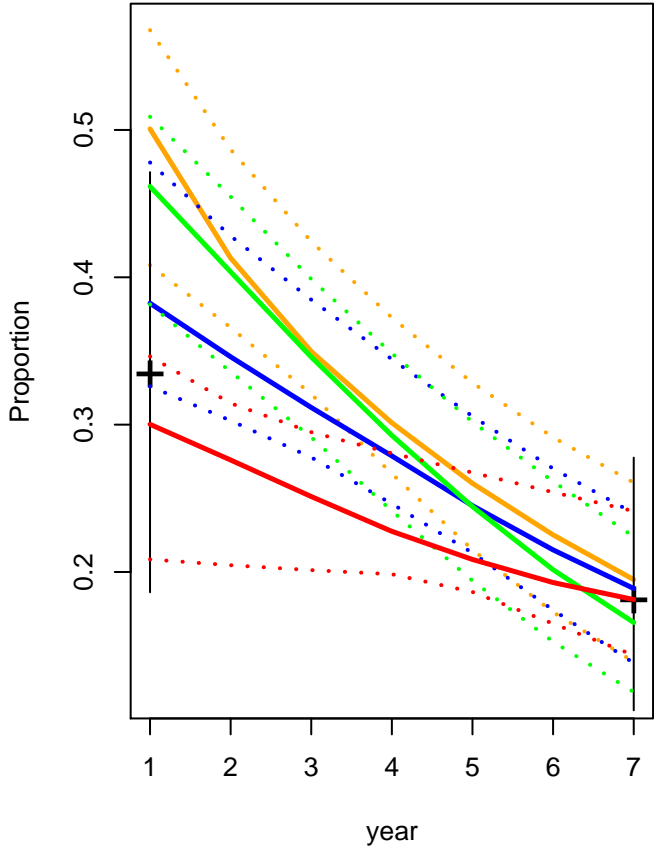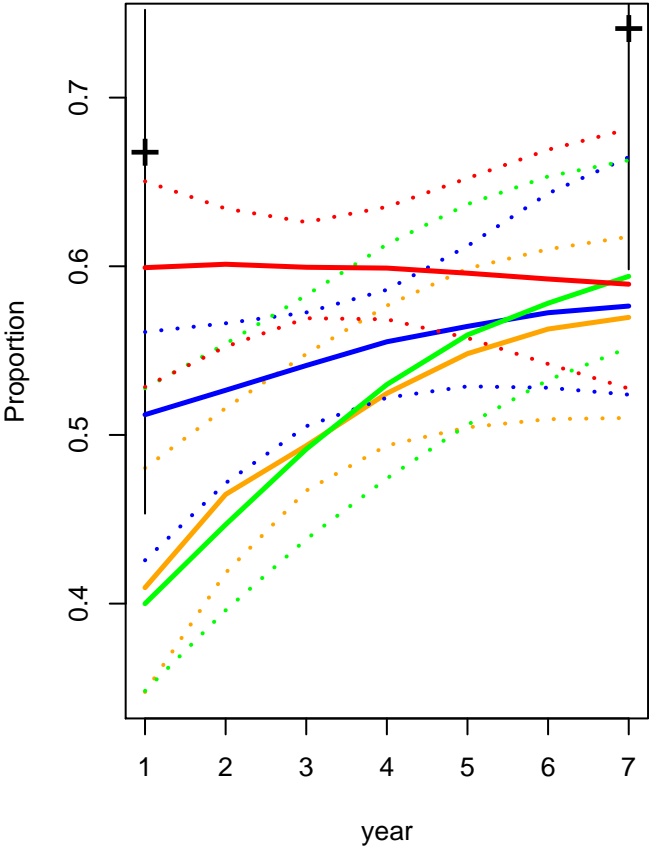

Moderate Infection

Dead

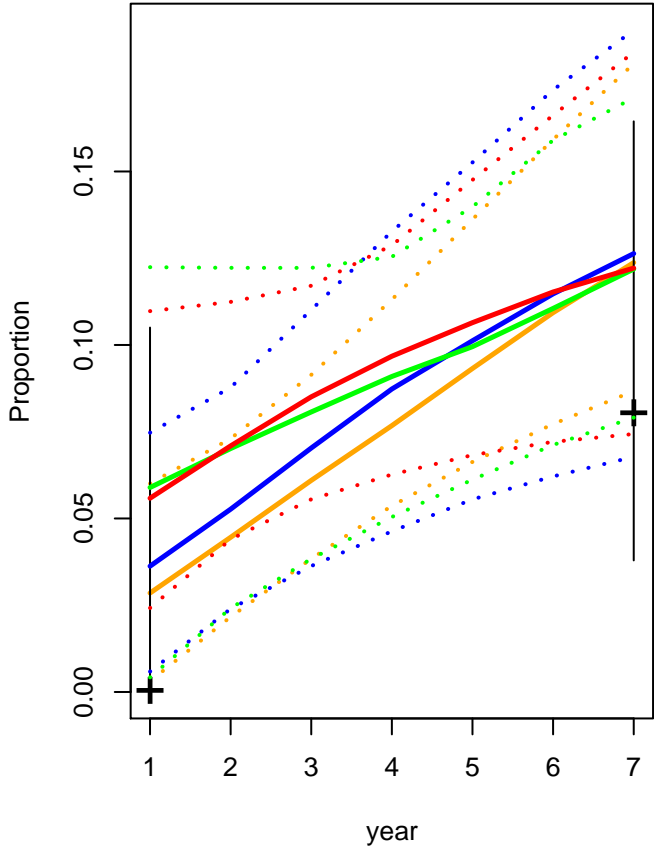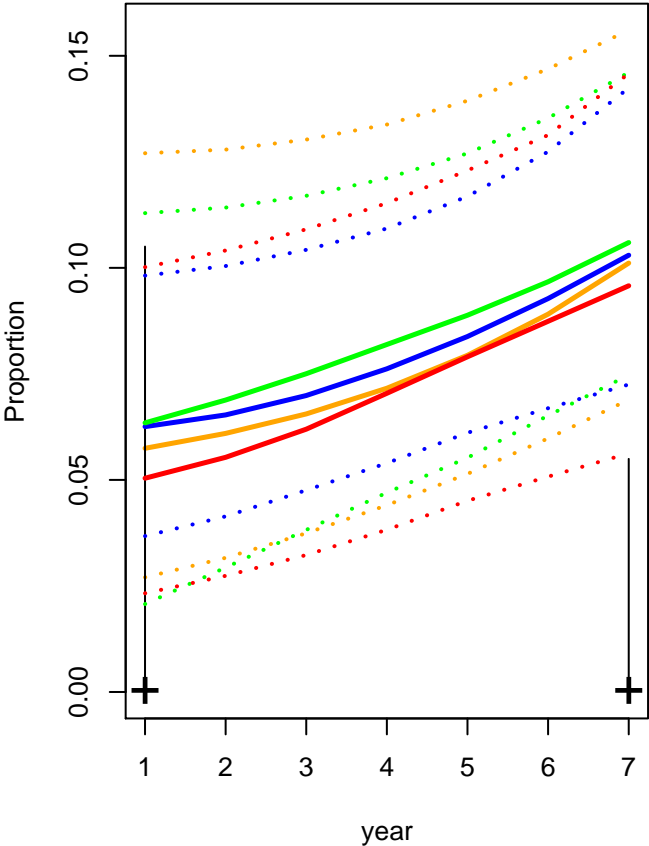

Uninfected

Site 67

Slight Infection

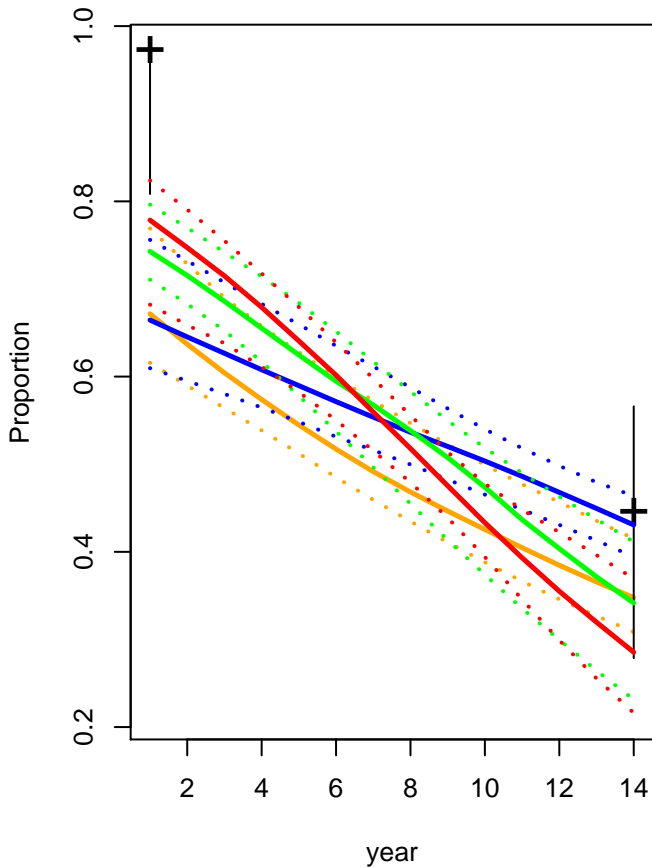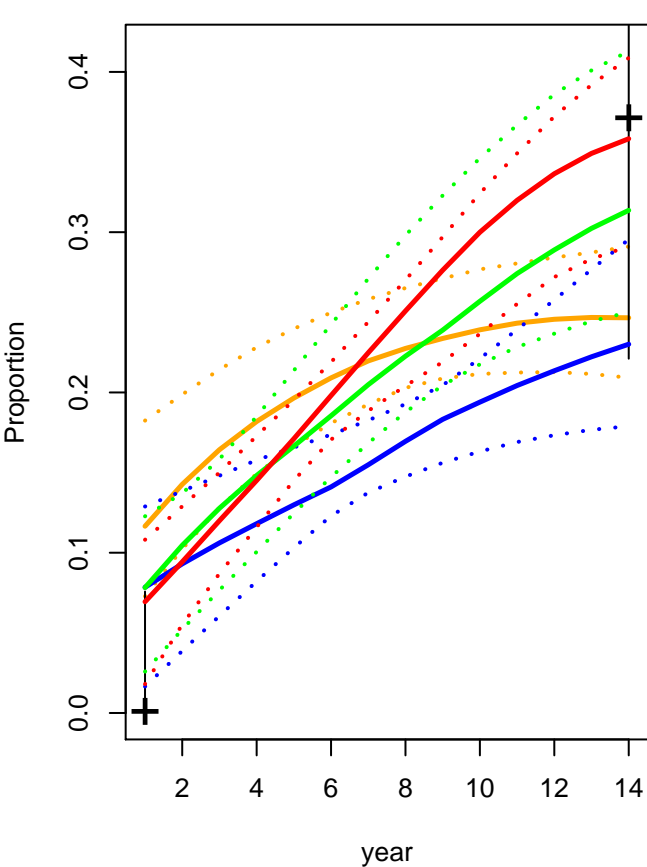

Moderate Infection

Dead

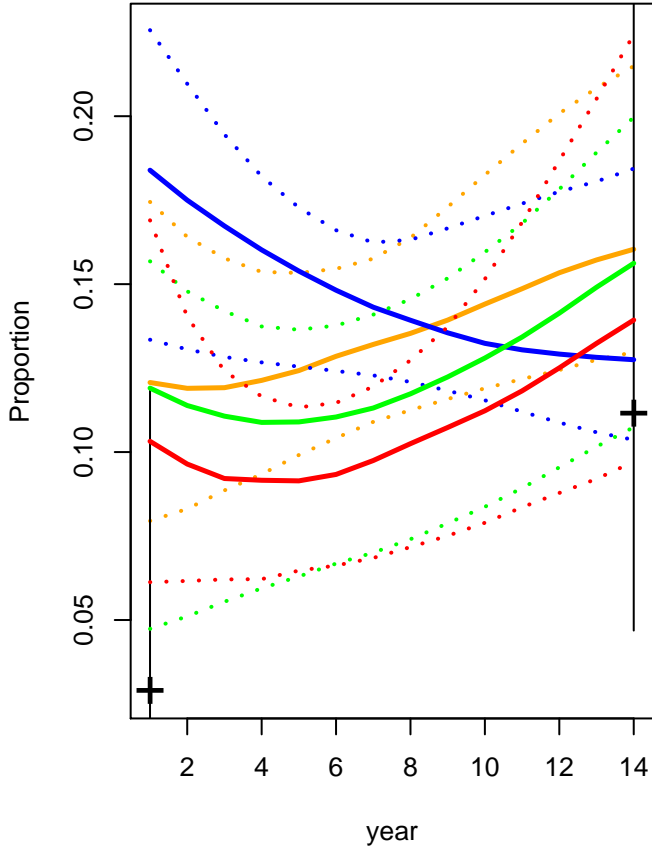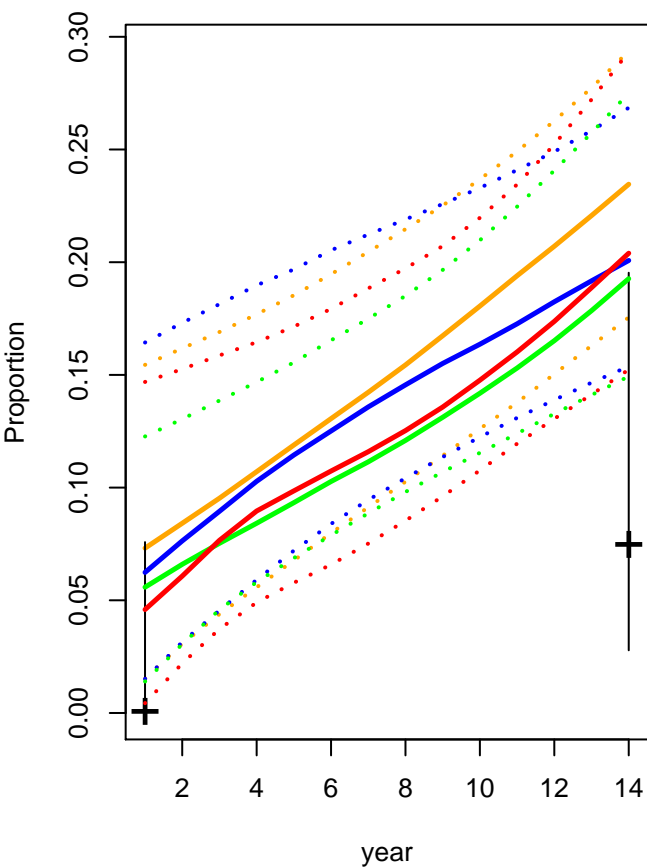

Uninfected

Site 68

Slight Infection

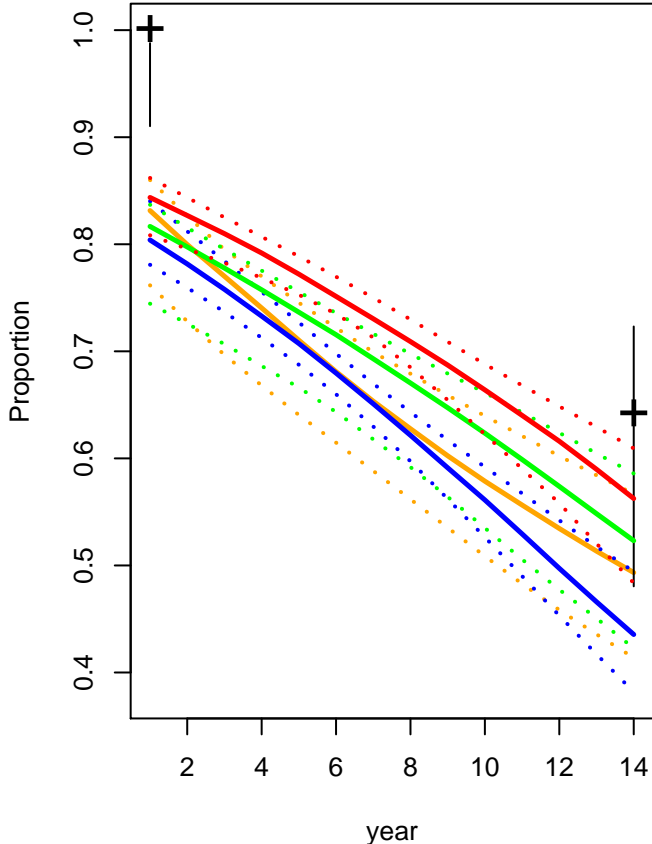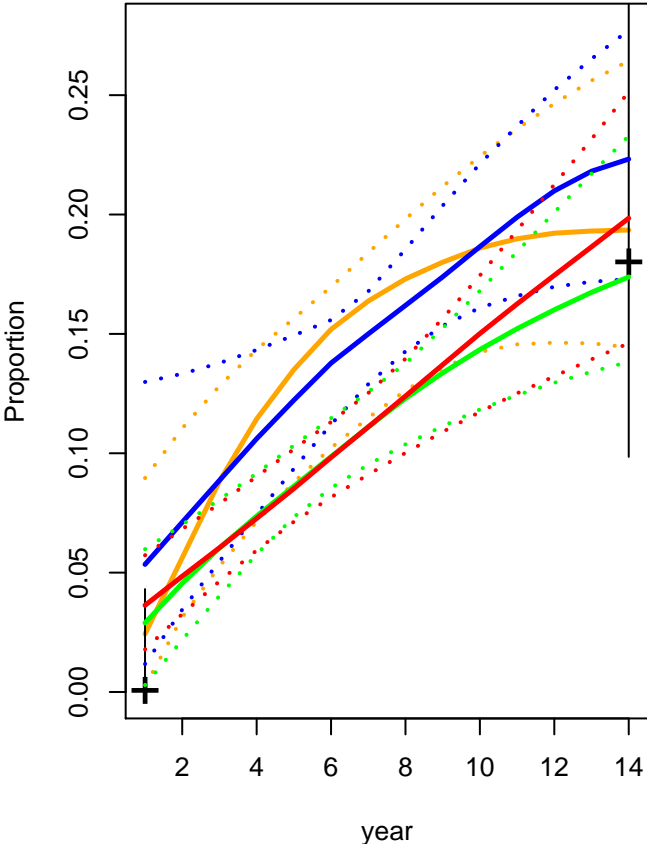

Moderate Infection

Dead

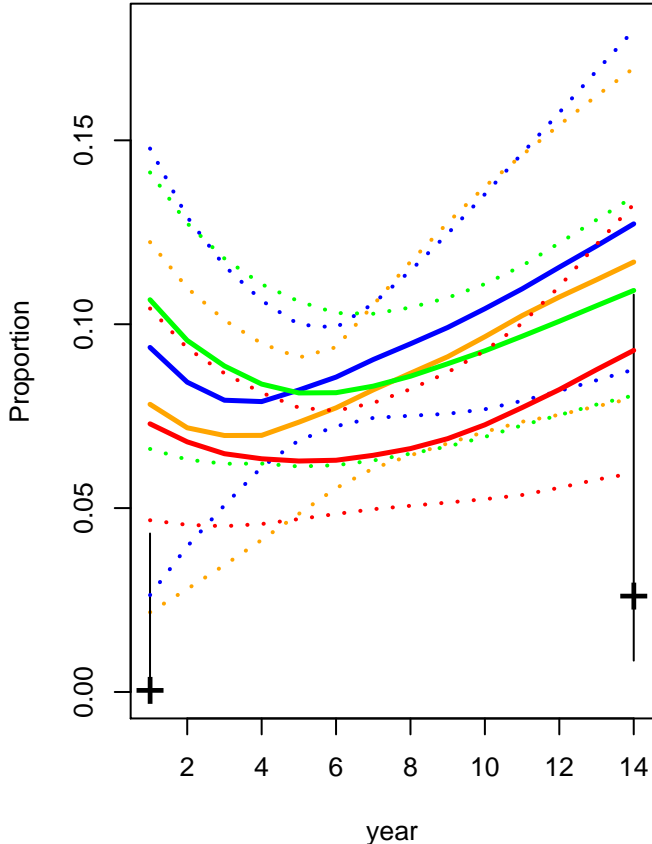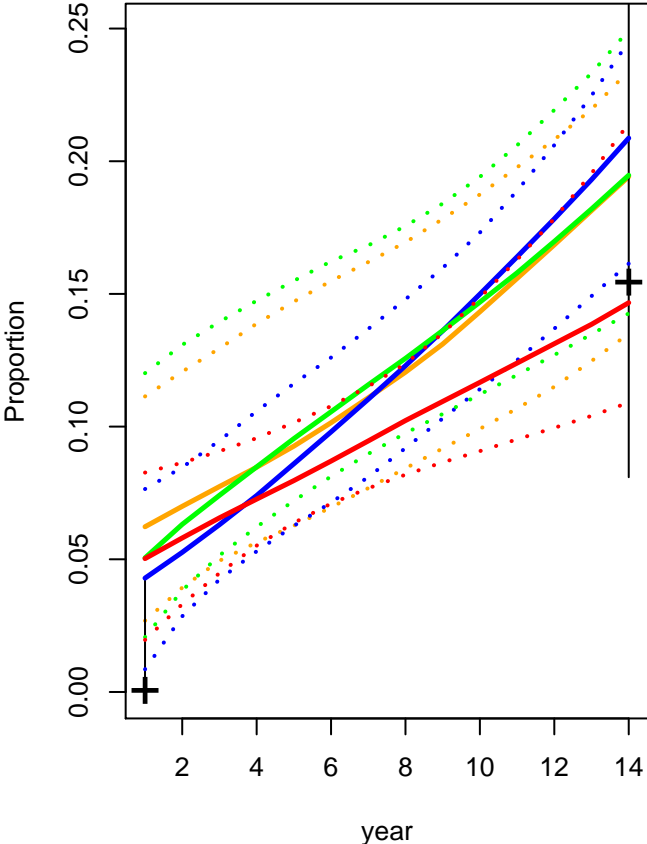

Uninfected

Site 69

Slight Infection

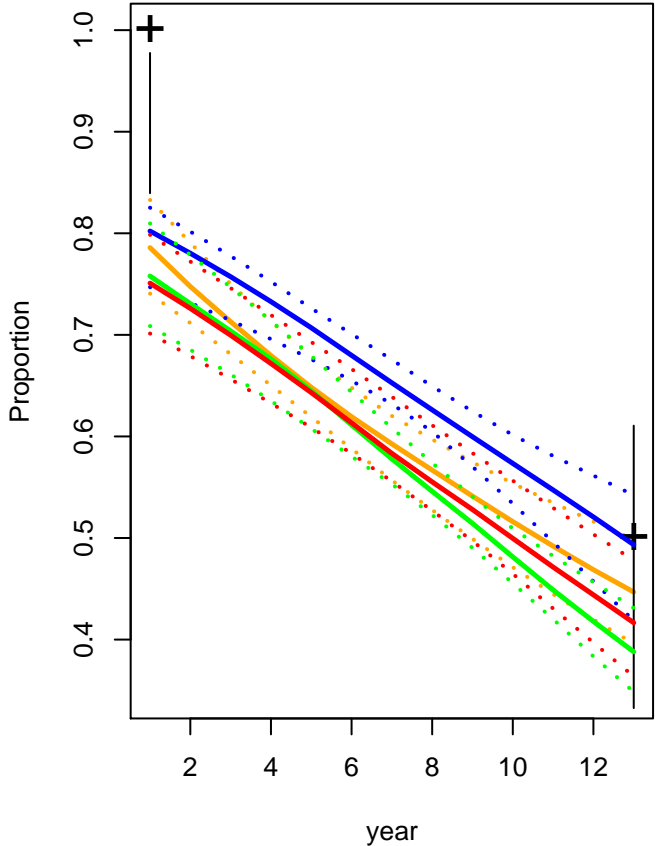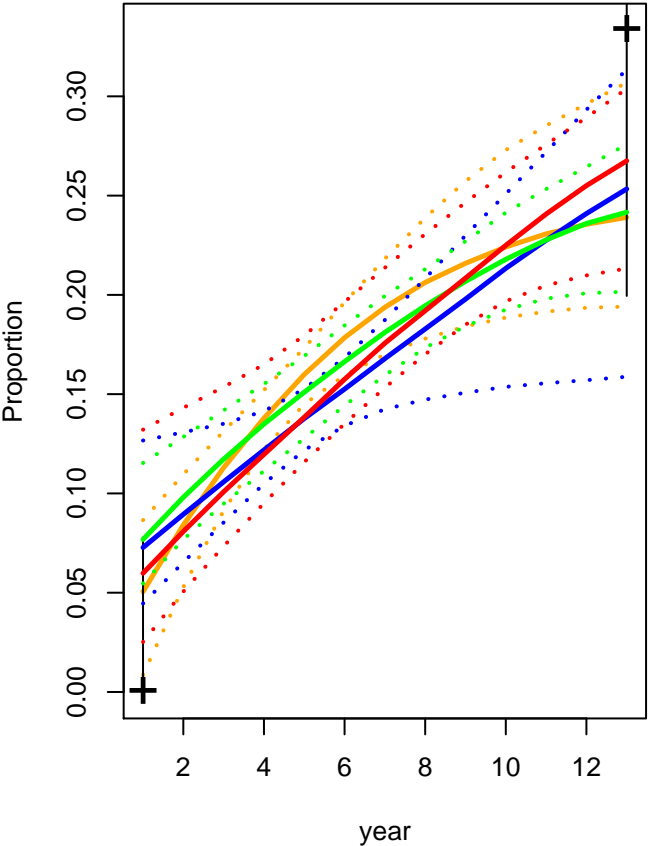

Moderate Infection

Dead

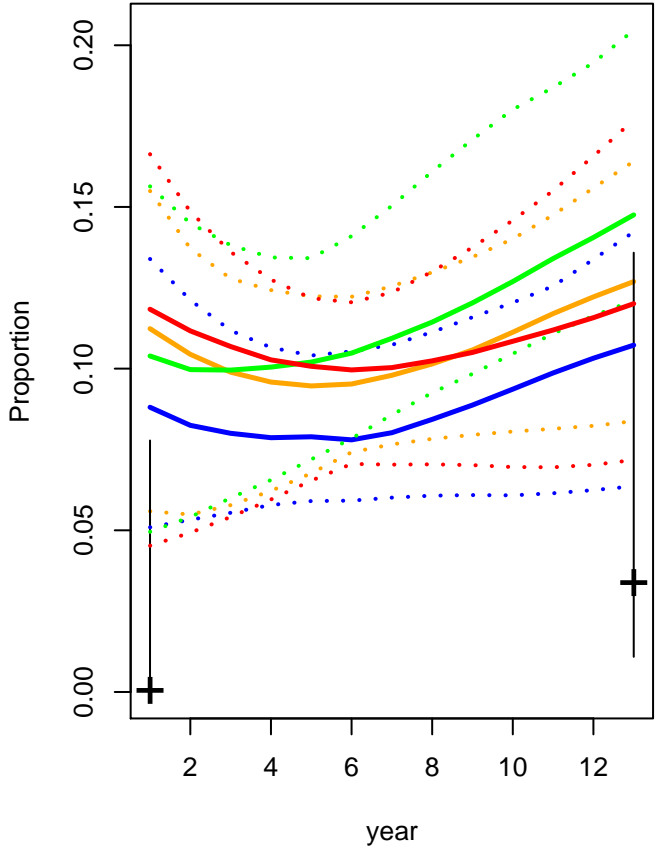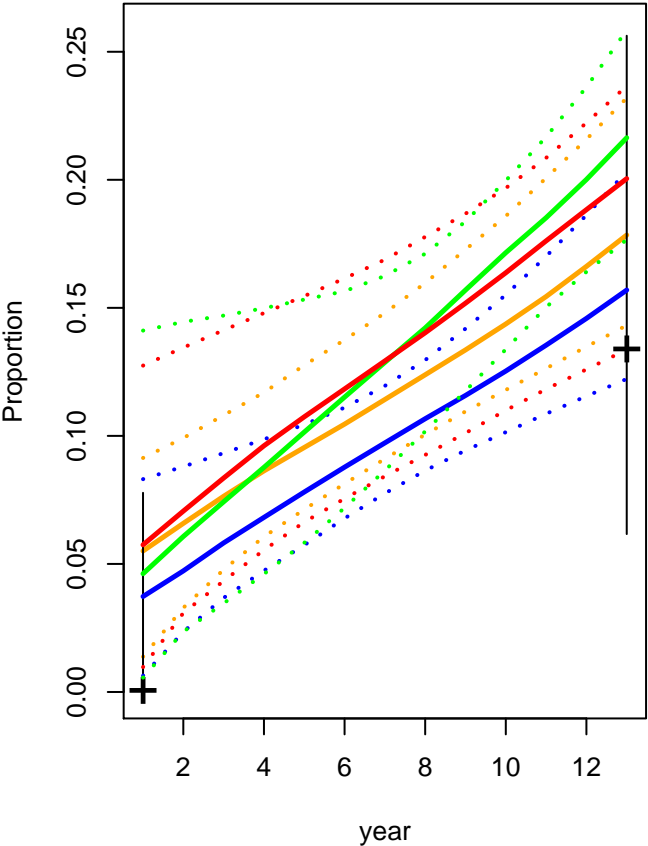

Uninfected

Site 70

Slight Infection

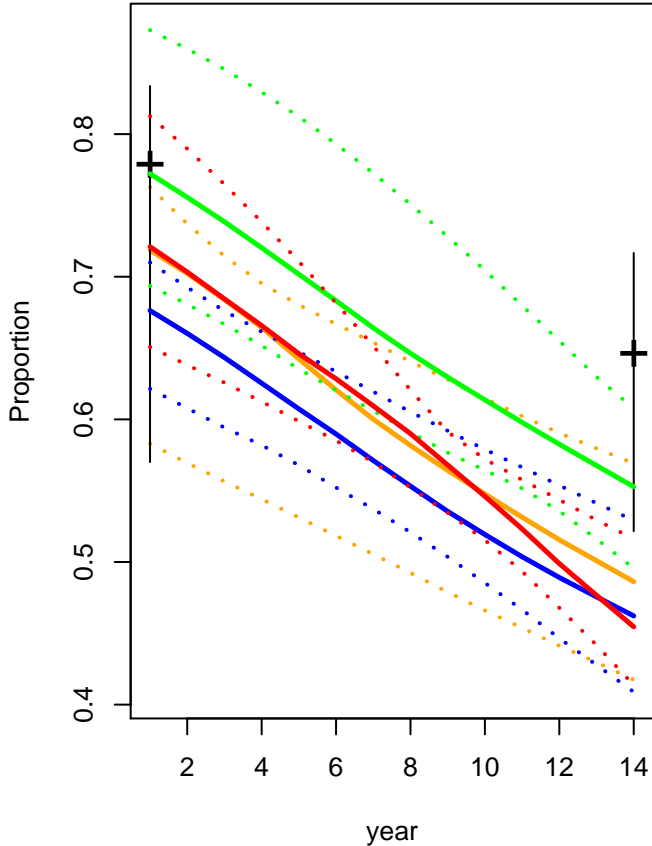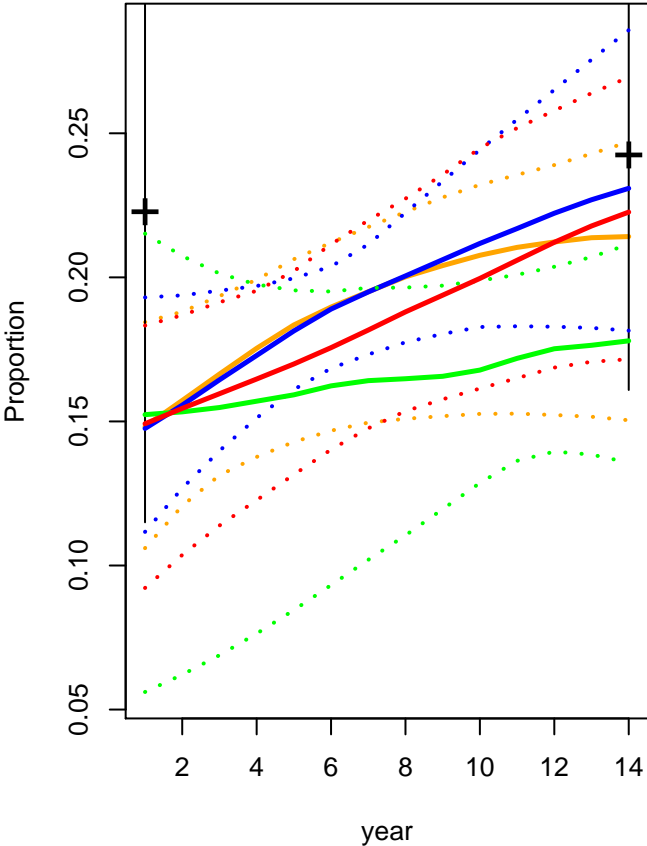

Moderate Infection

Dead

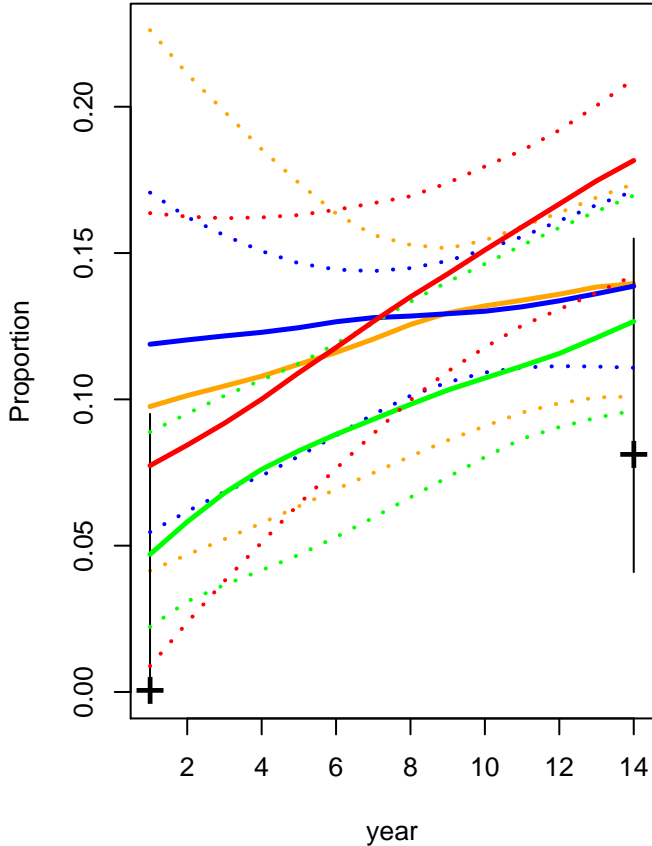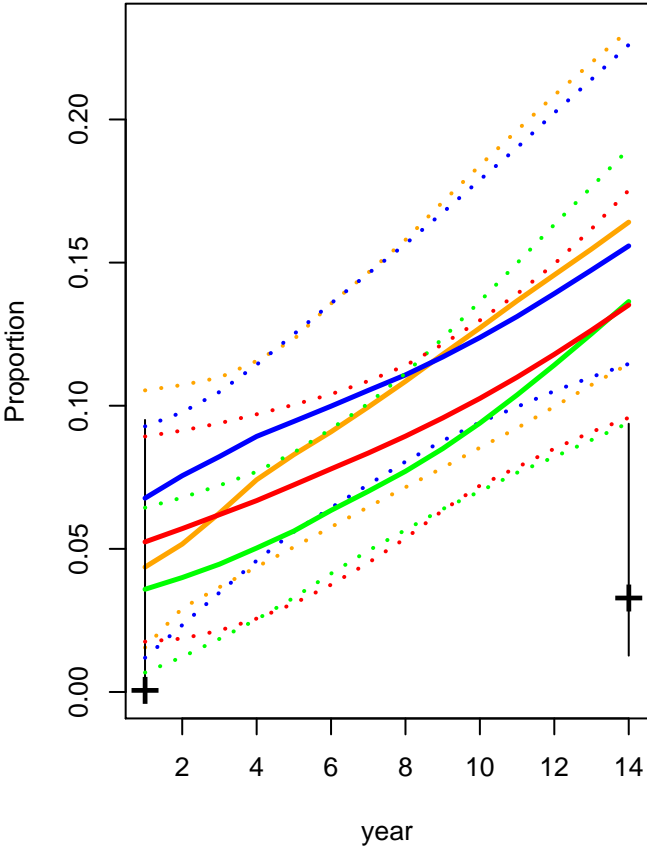



Uninfected

Site 71

Slight Infection

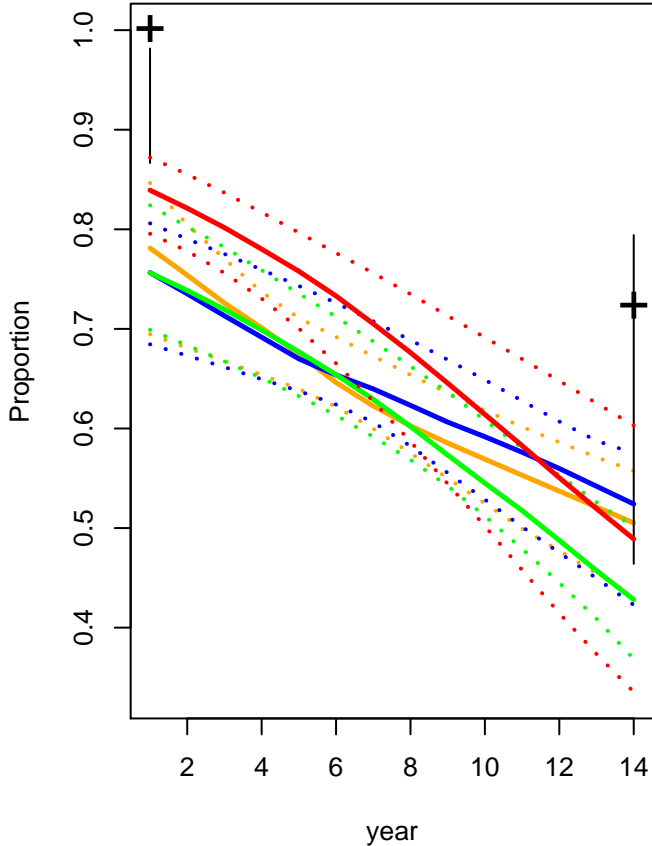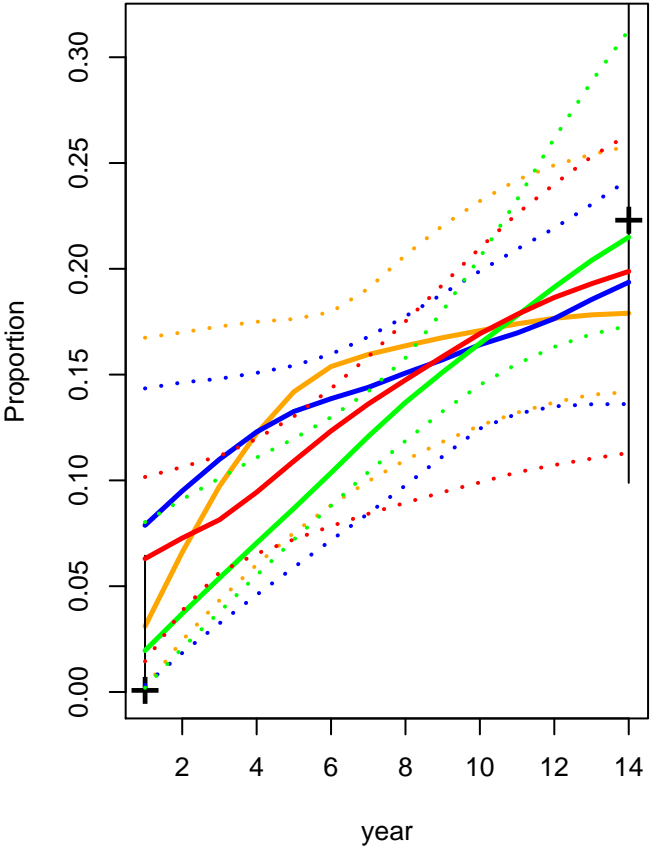

Moderate Infection

Dead

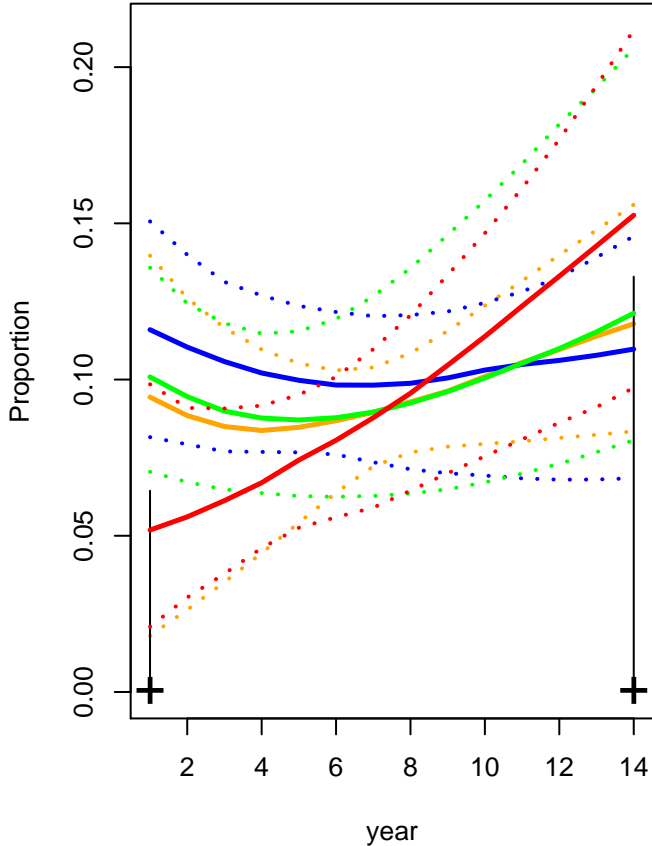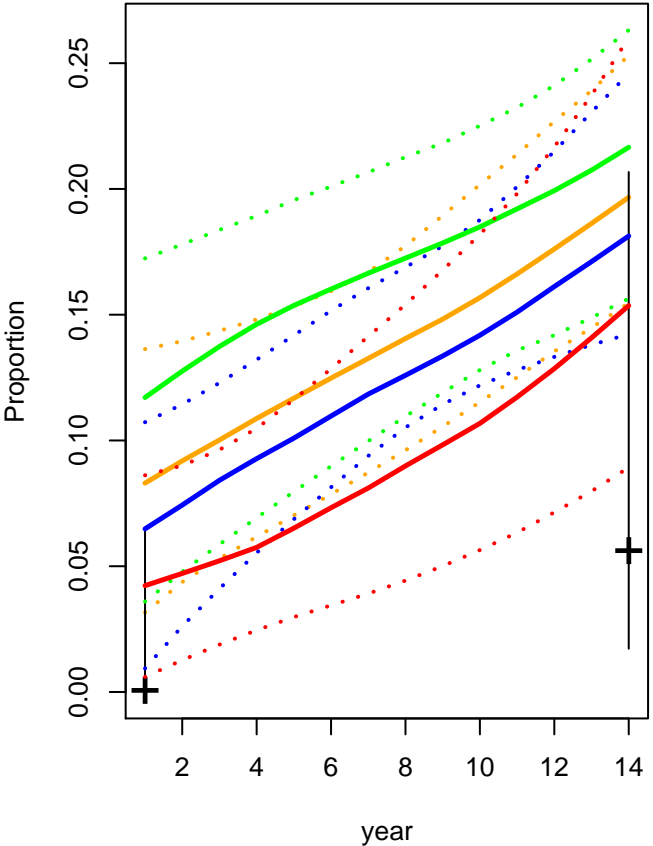

Uninfected

Site 72

Slight Infection

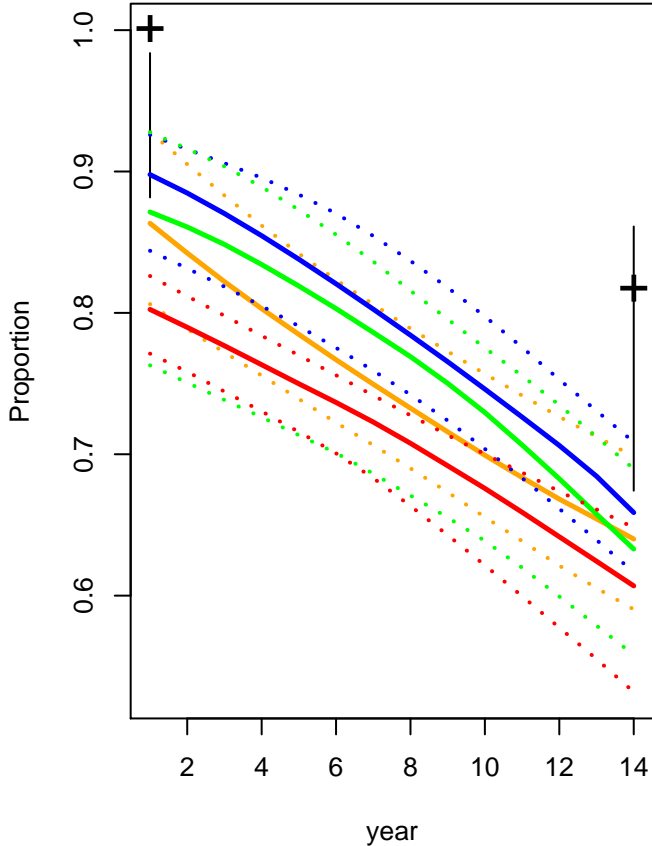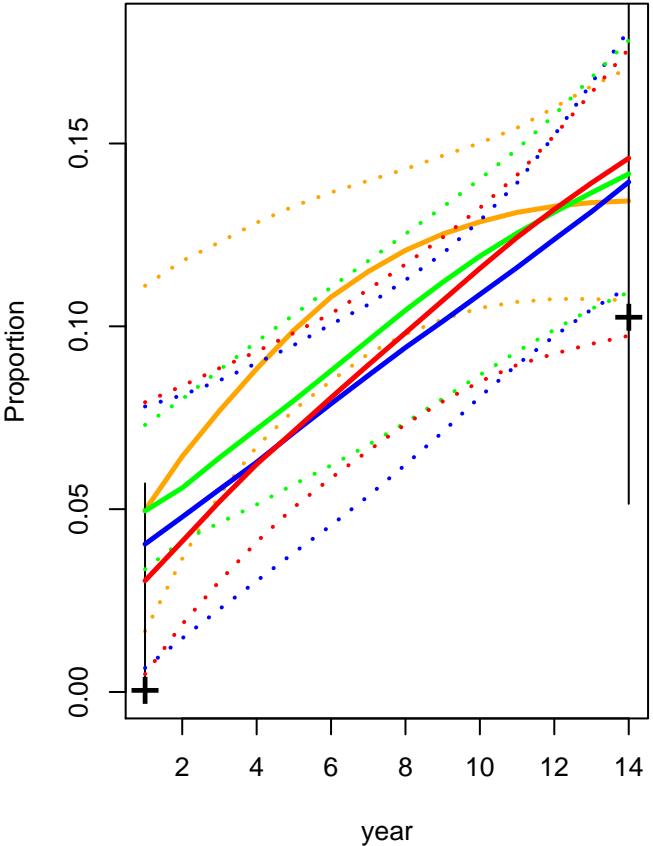

Moderate Infection

Dead

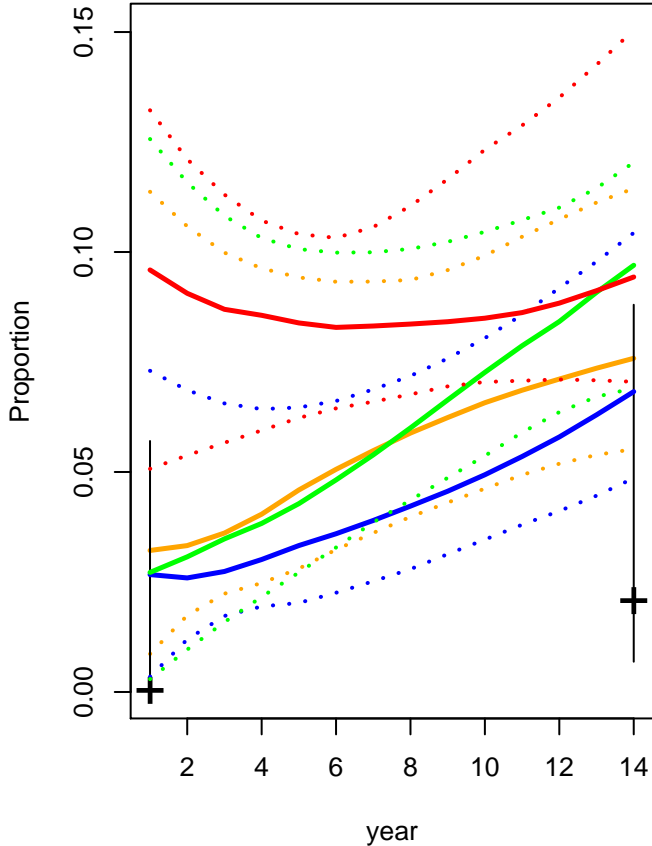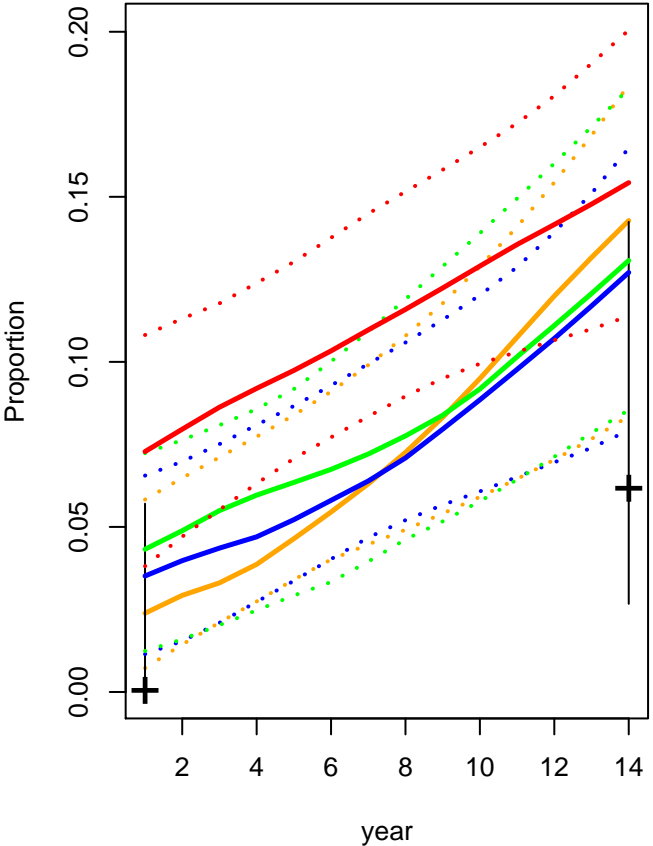

Uninfected

Site 73

Slight Infection

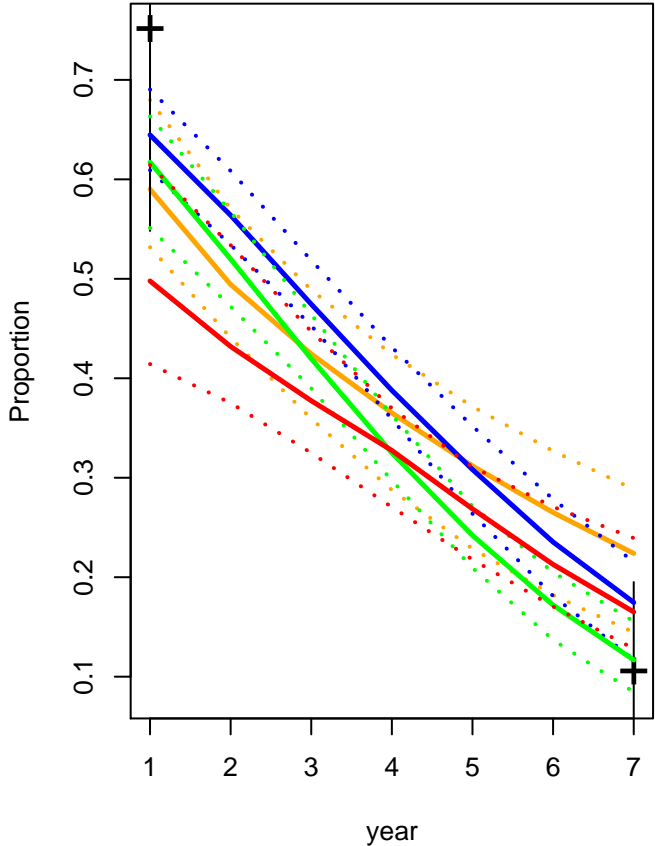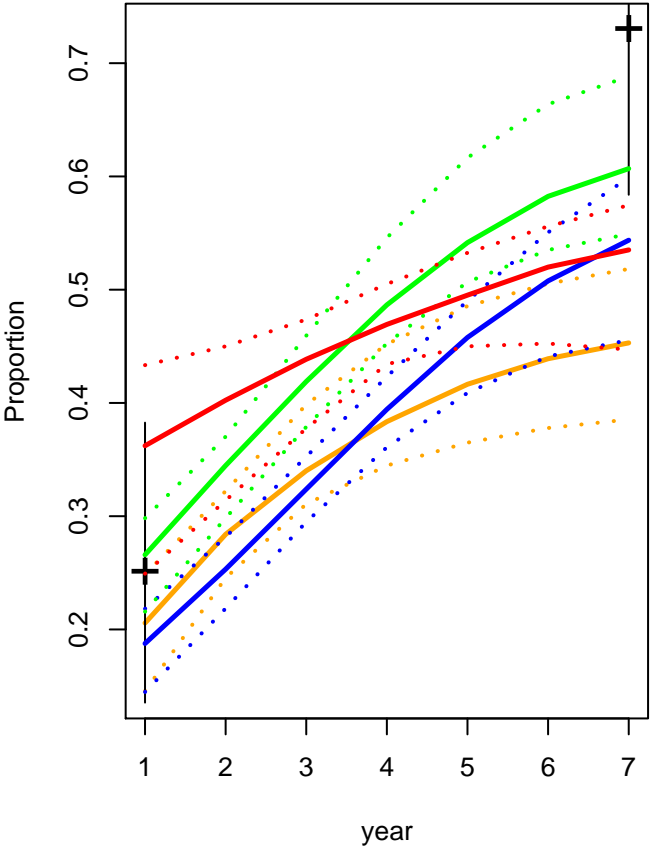

Moderate Infection

Dead

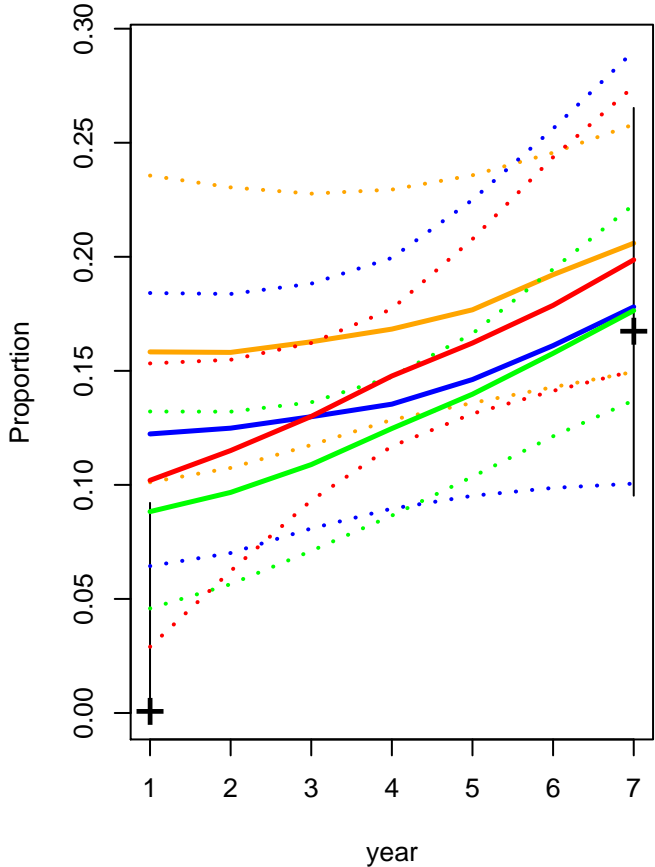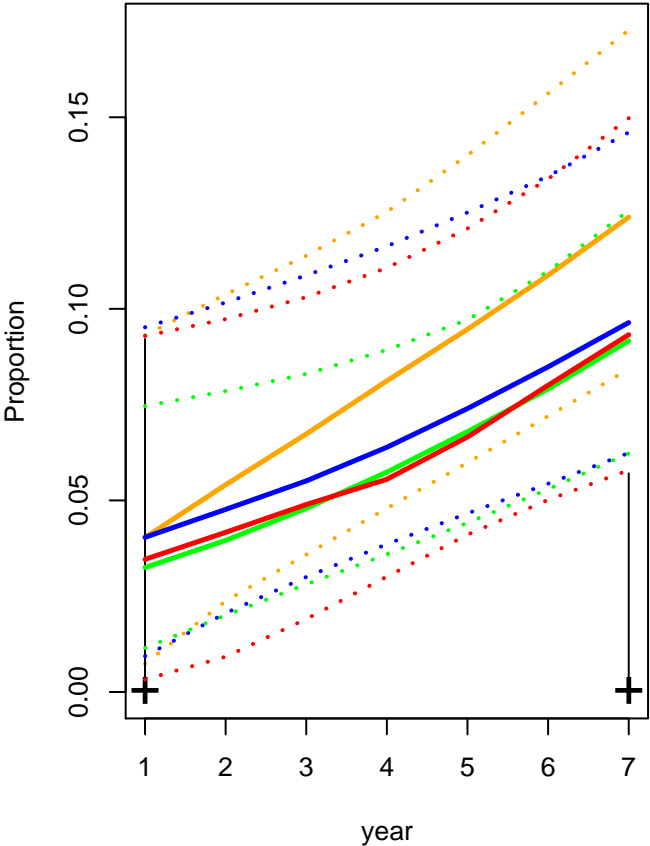

Uninfected

Site 74

Slight Infection

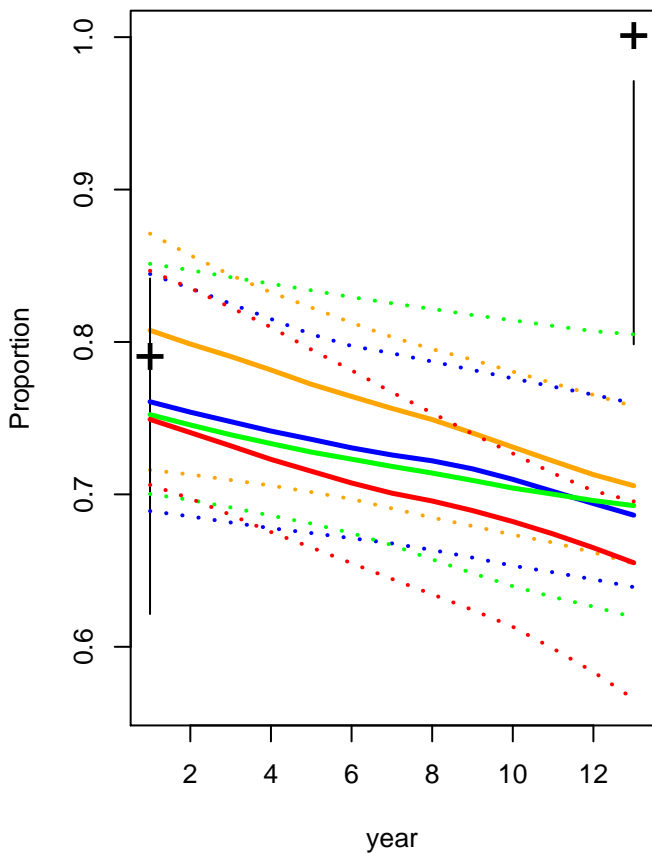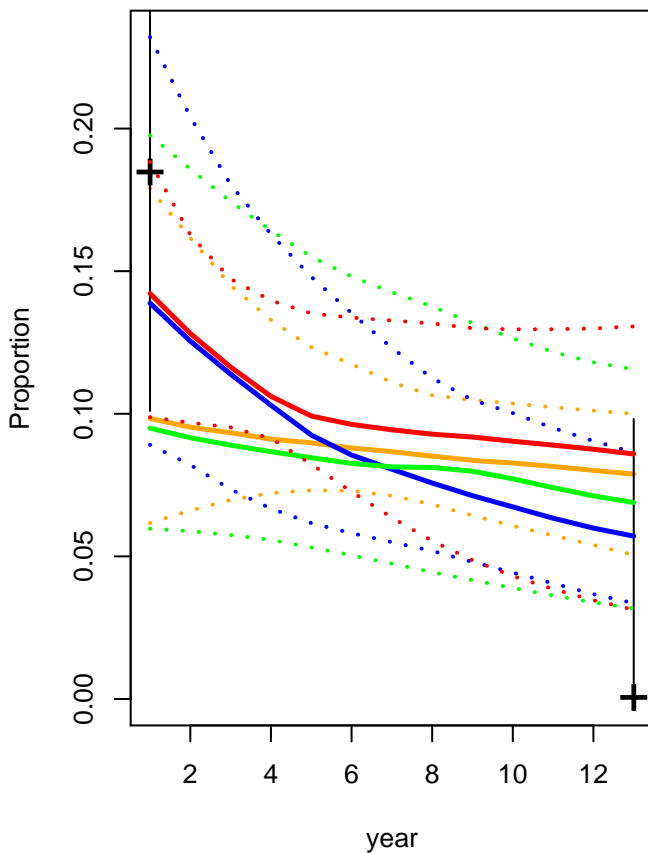

Moderate Infection

Dead

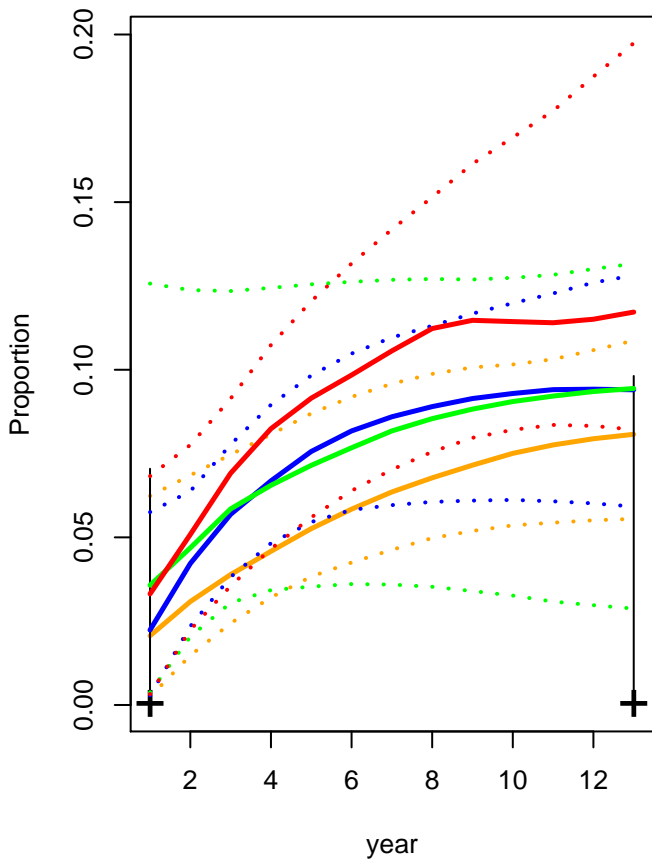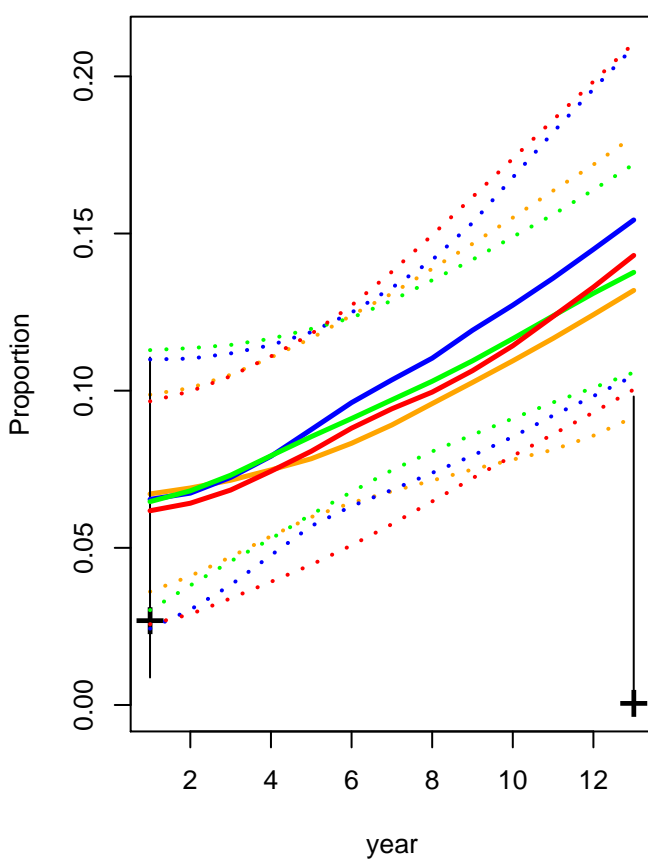

Uninfected

Site 75

Slight Infection

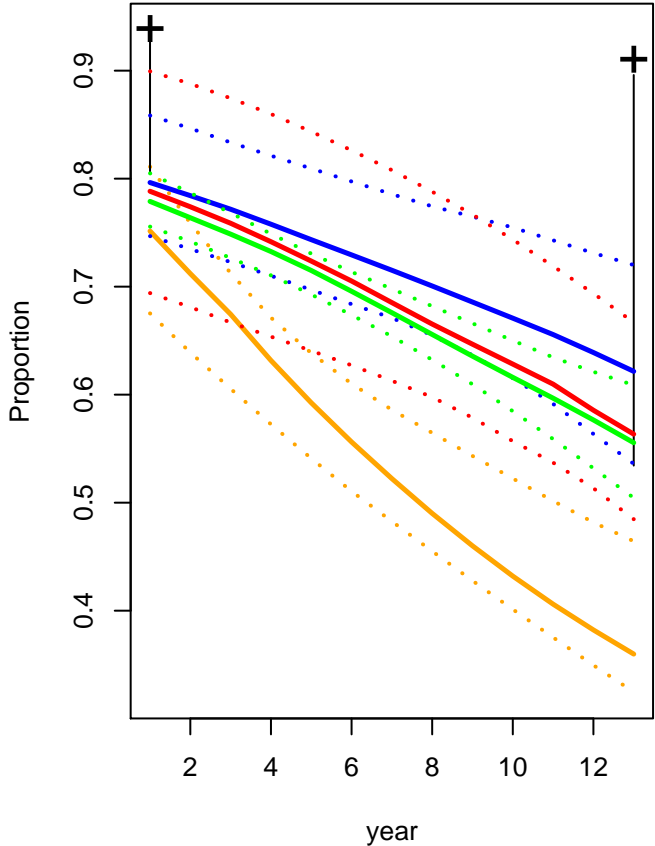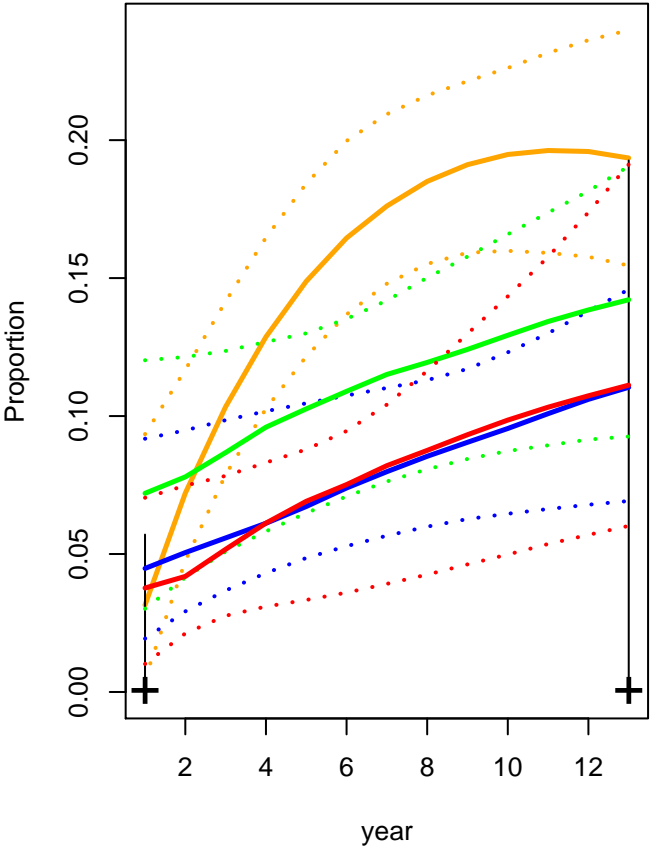

Moderate Infection

Dead

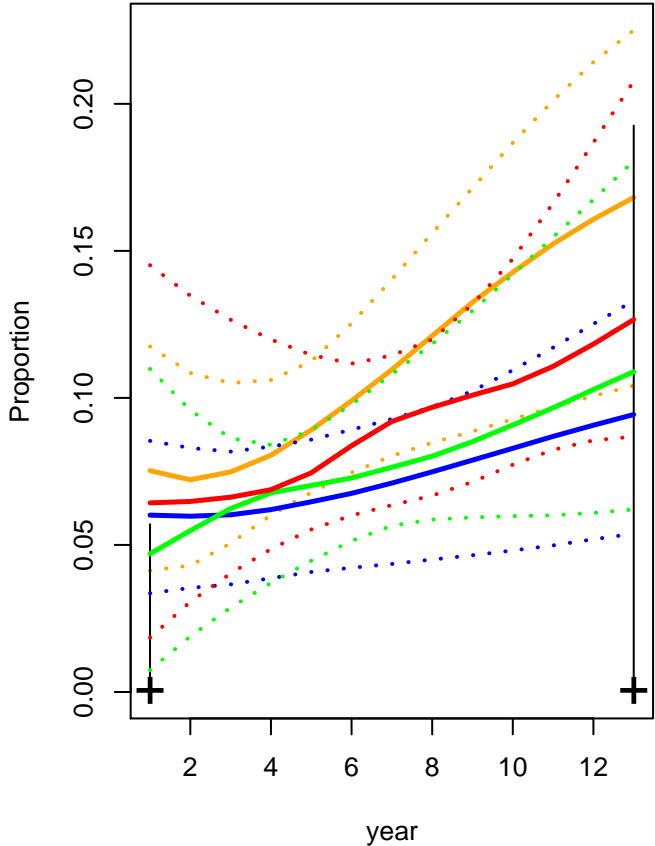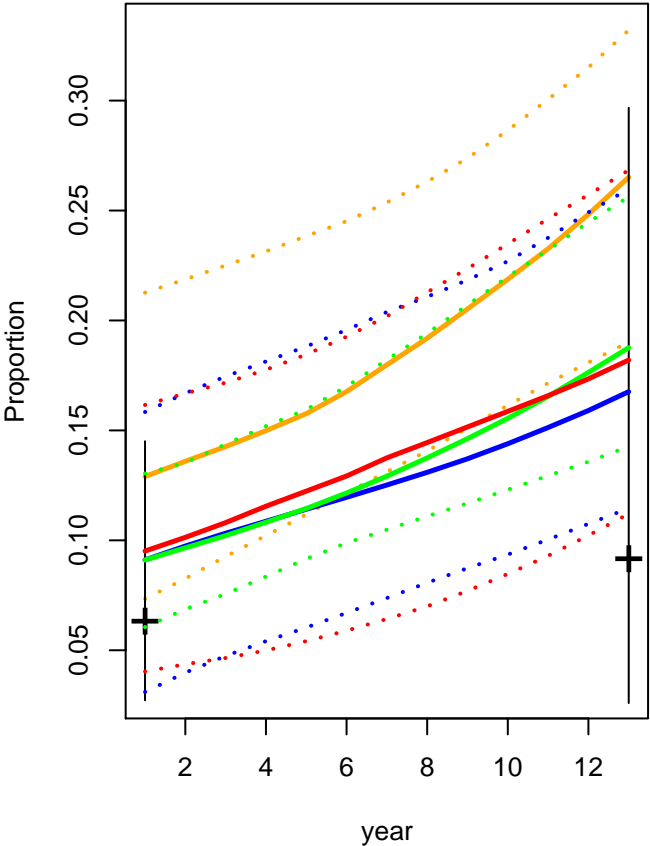

Uninfected

Site 76

Slight Infection

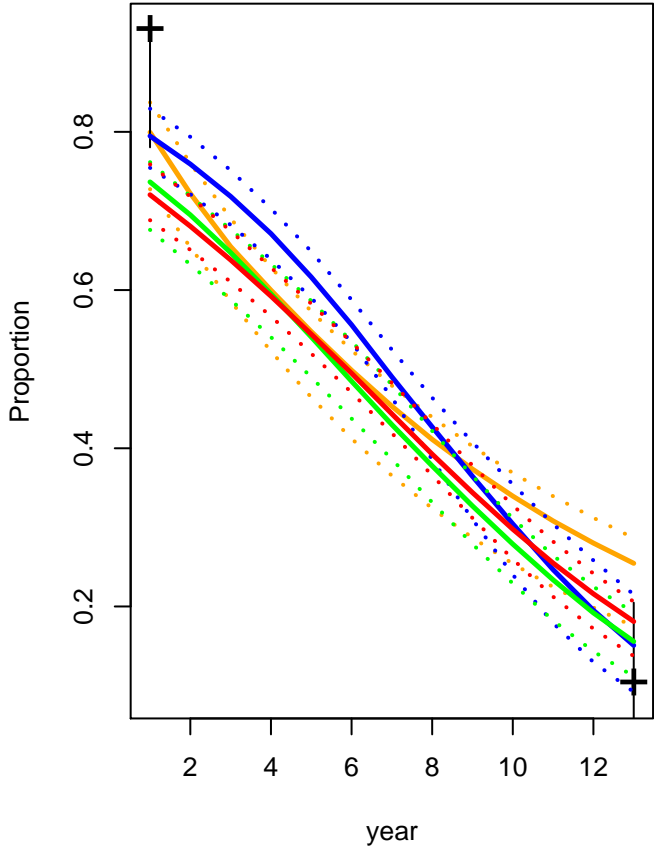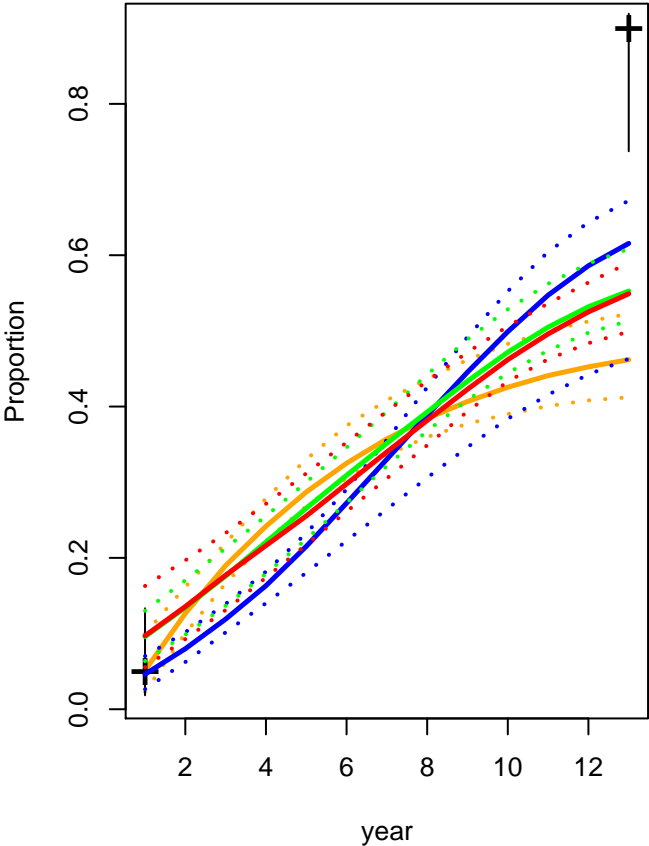

Moderate Infection

Dead

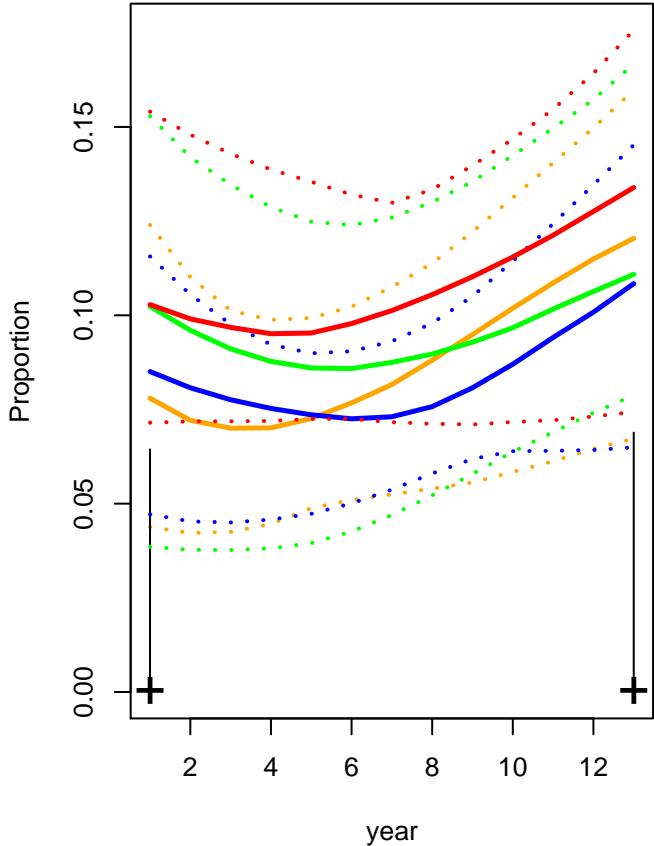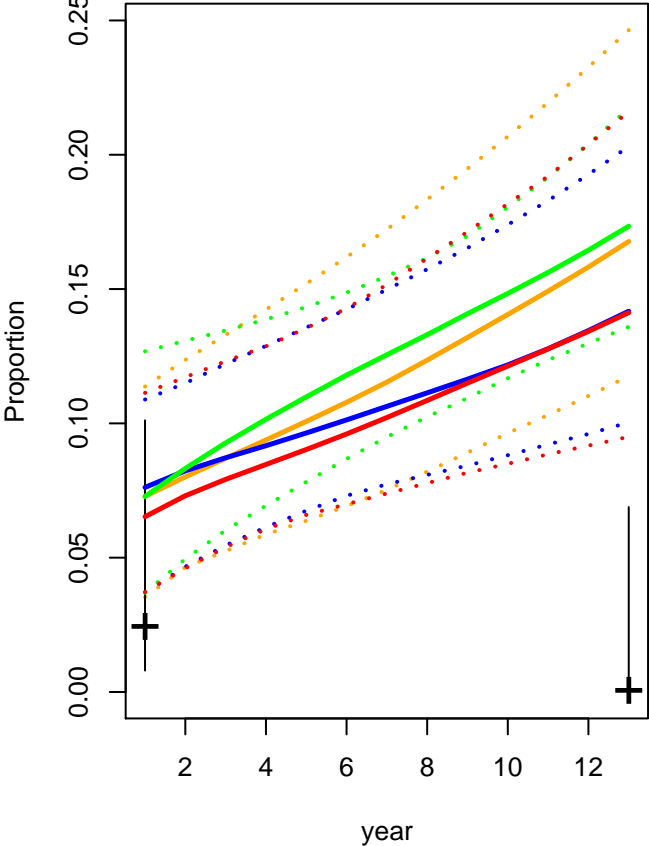

Uninfected

Site 77

Slight Infection

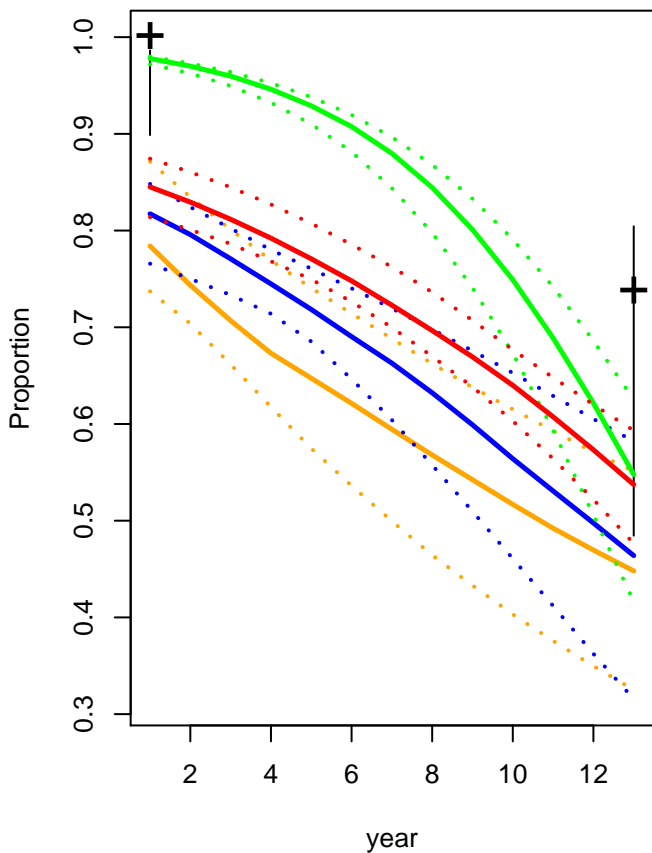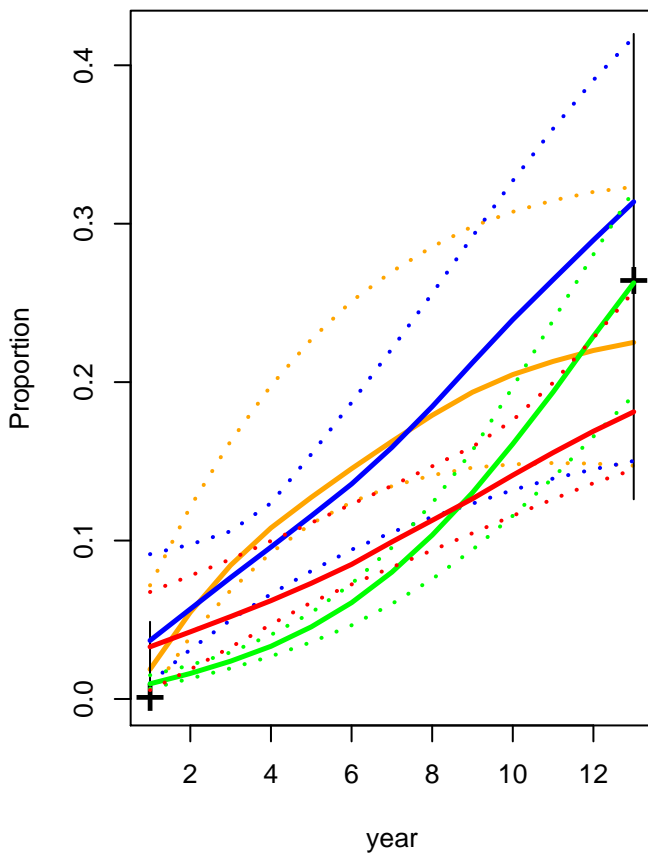

Moderate Infection

Dead

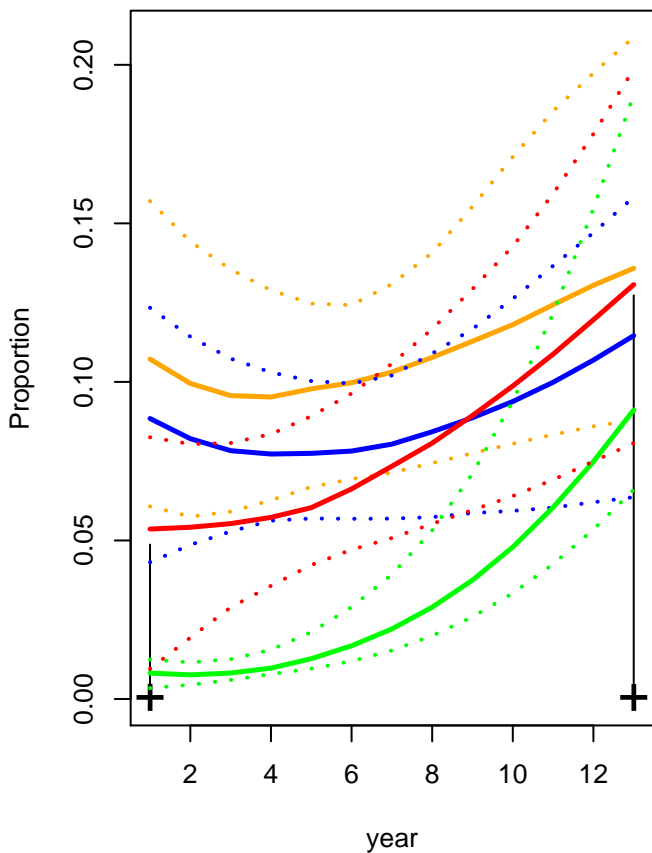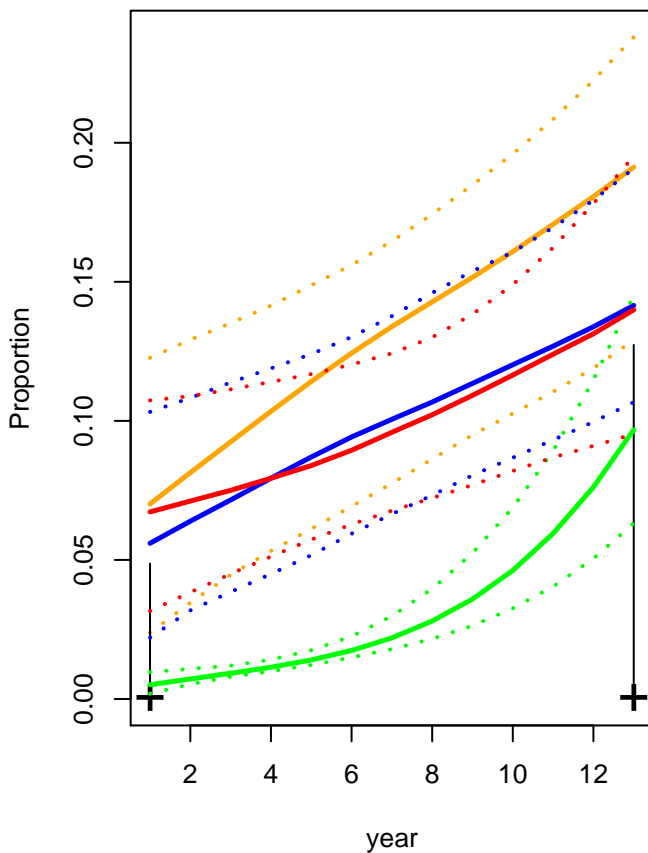

Uninfected

Site 78

Slight Infection

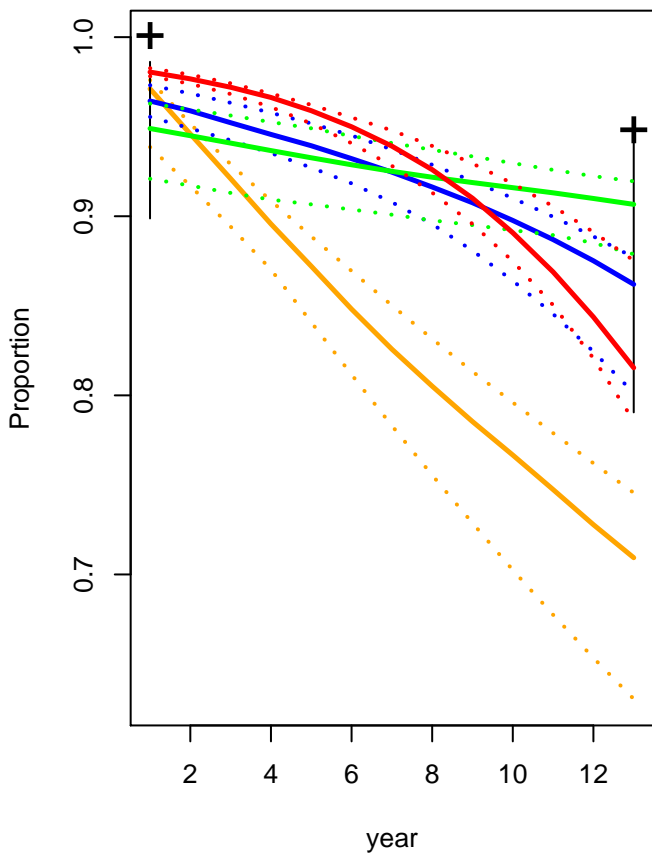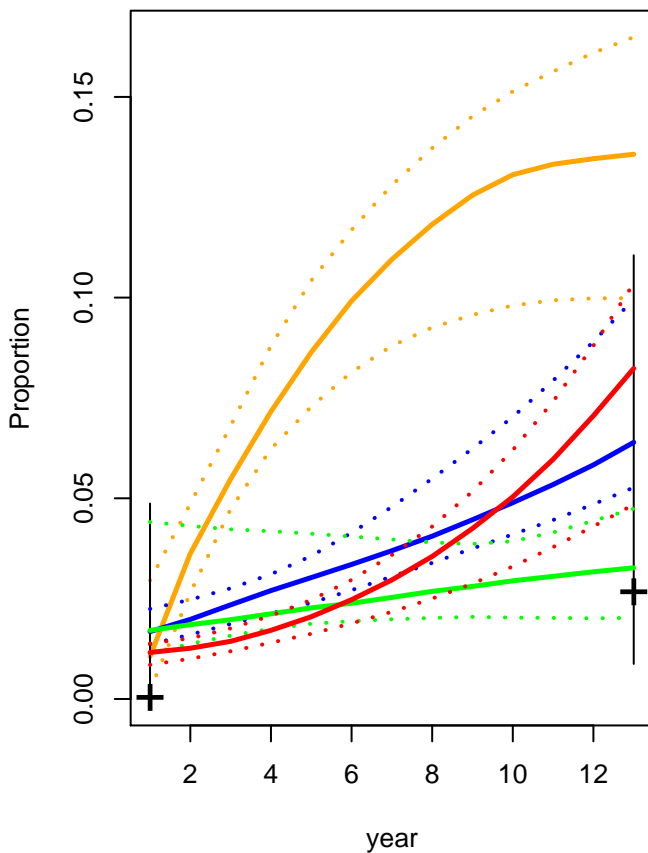

Moderate Infection

Dead

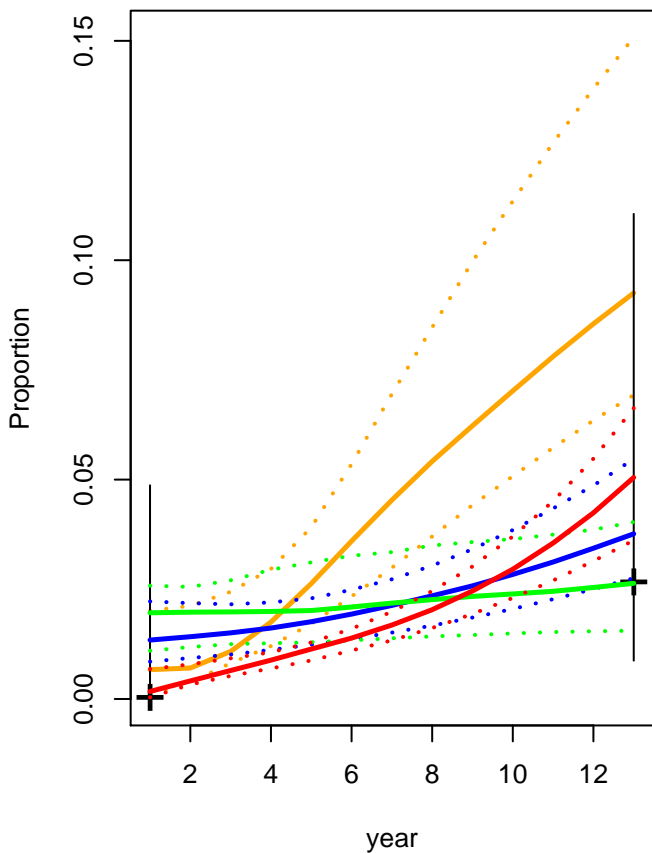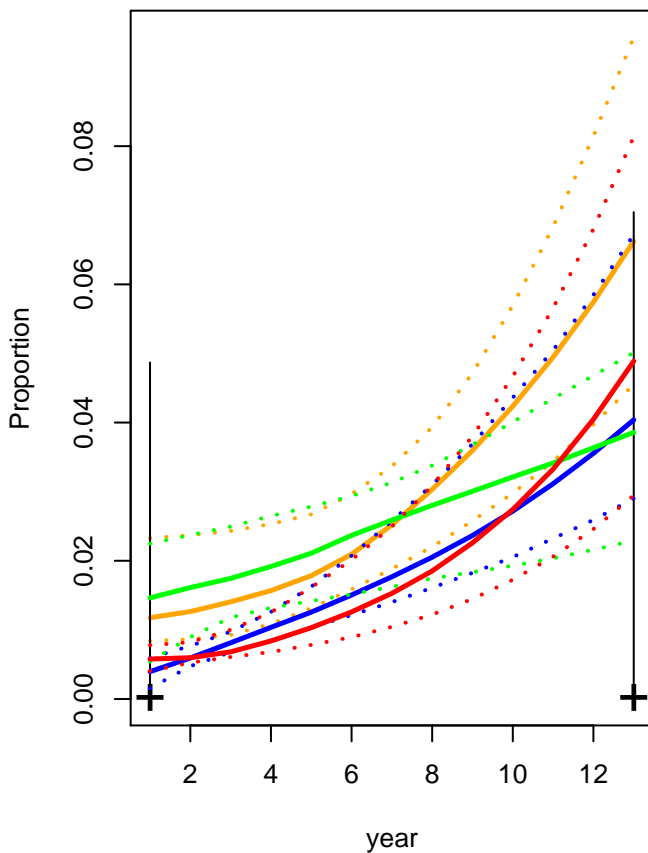



Site 79

Uninfected

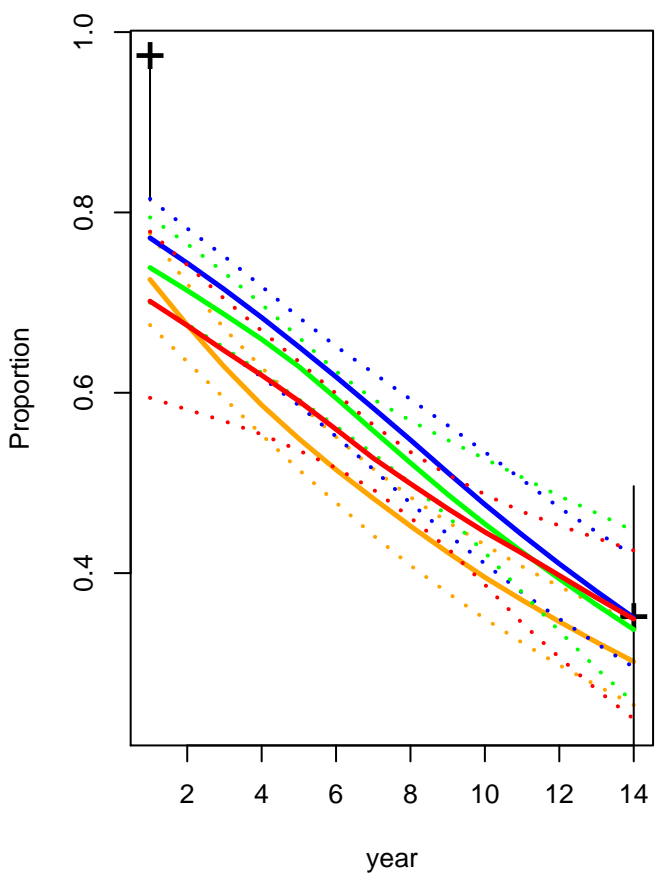

Slight Infection

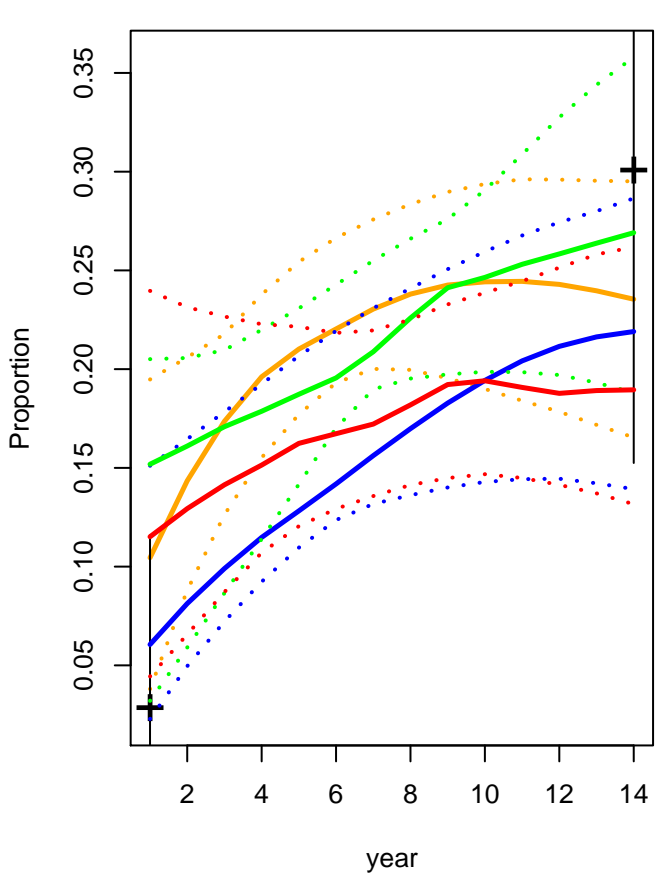

Moderate Infection

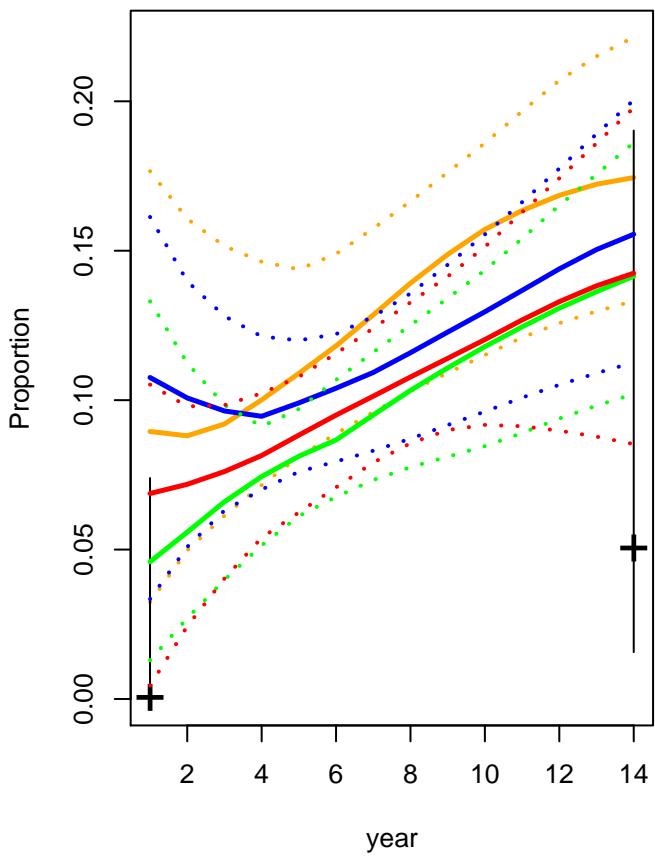

Dead

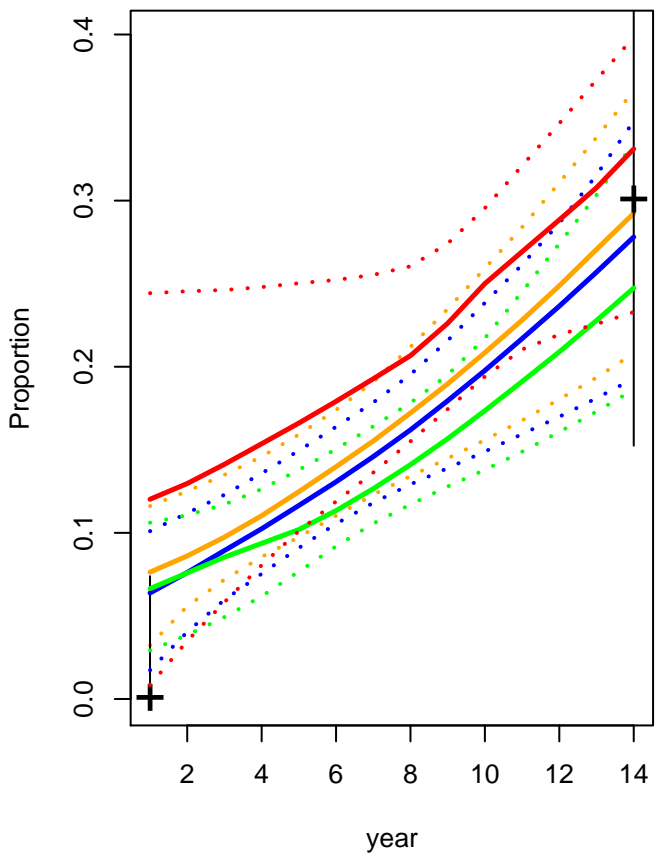

Uninfected

Site 80

Slight Infection

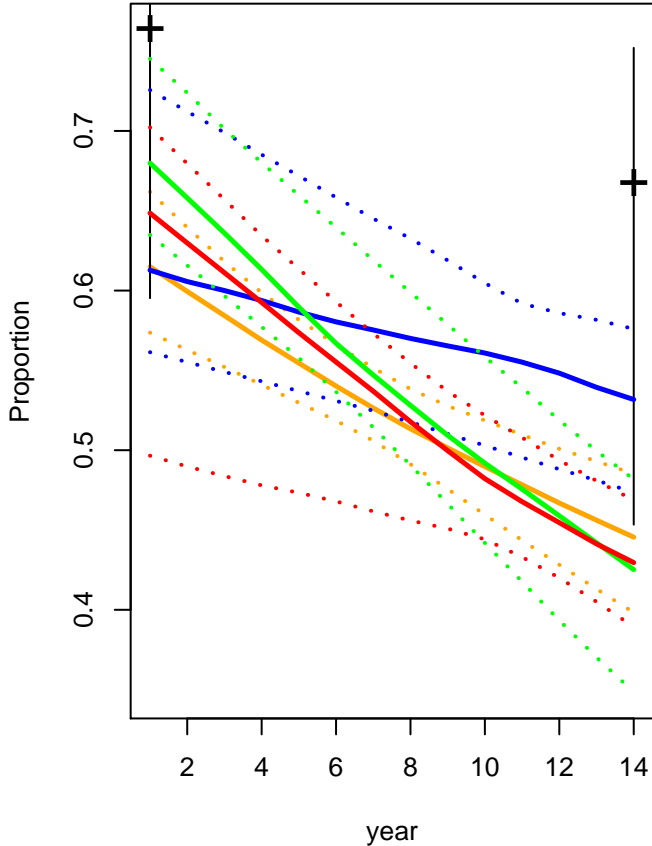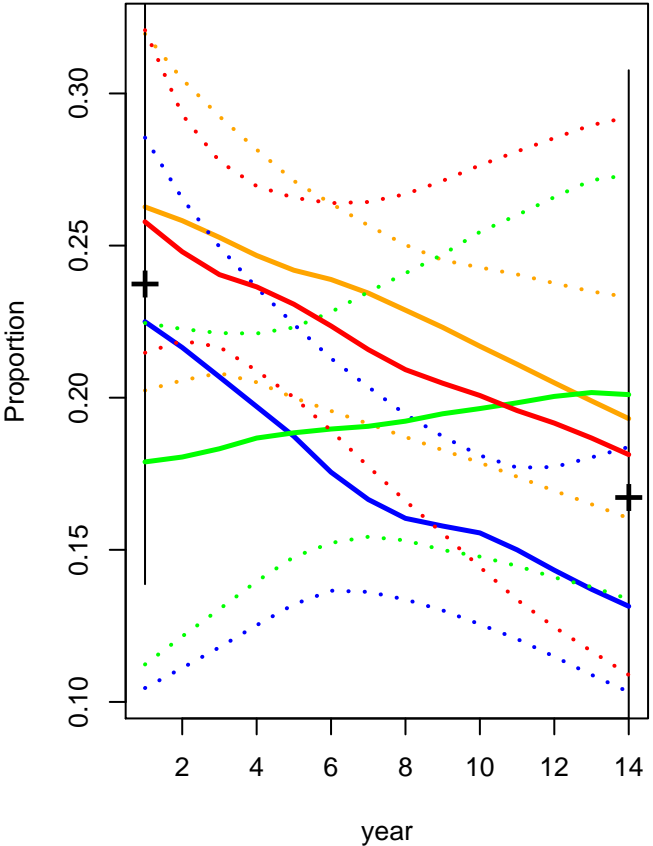

Moderate Infection

Dead

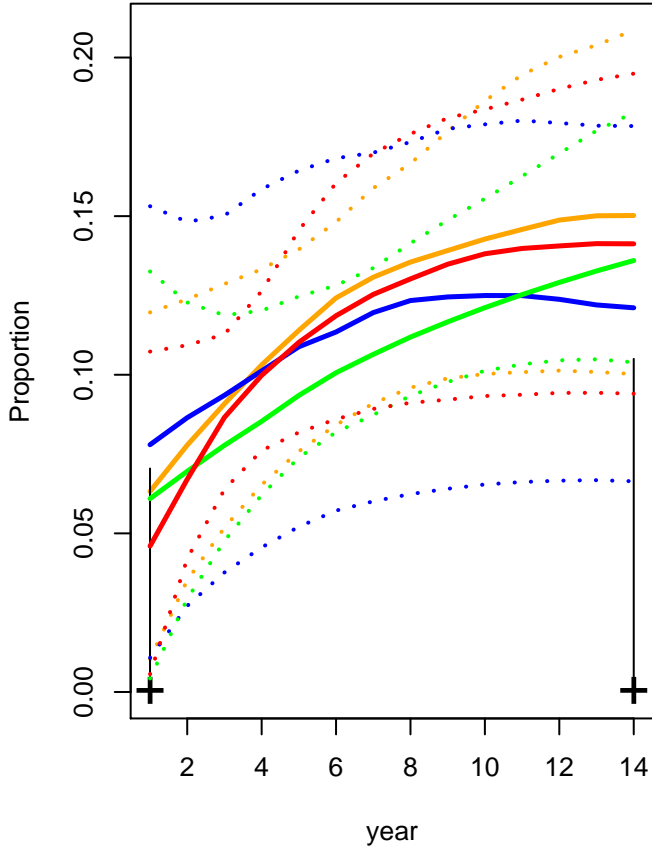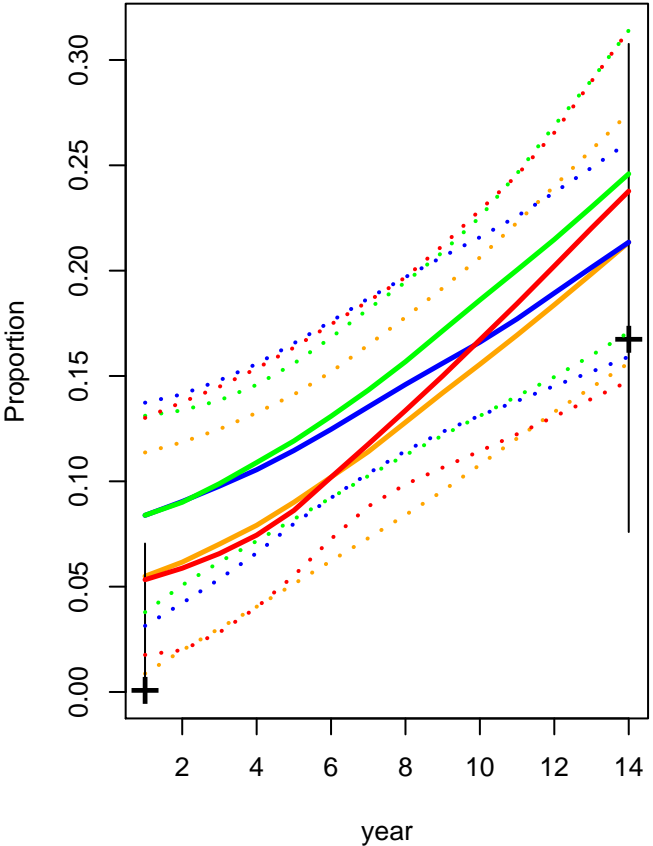

Uninfected

Site 81

Slight Infection

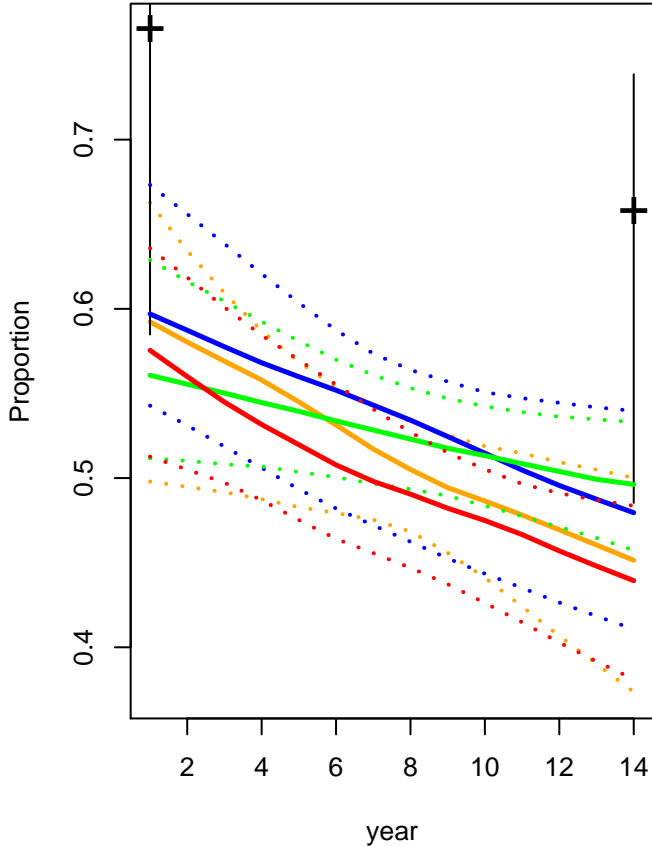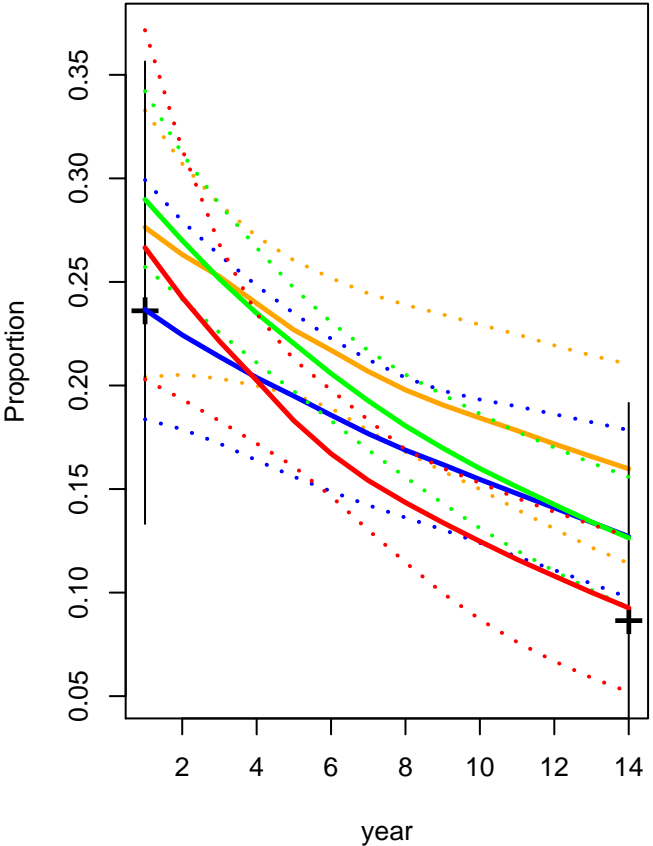

Moderate Infection

Dead

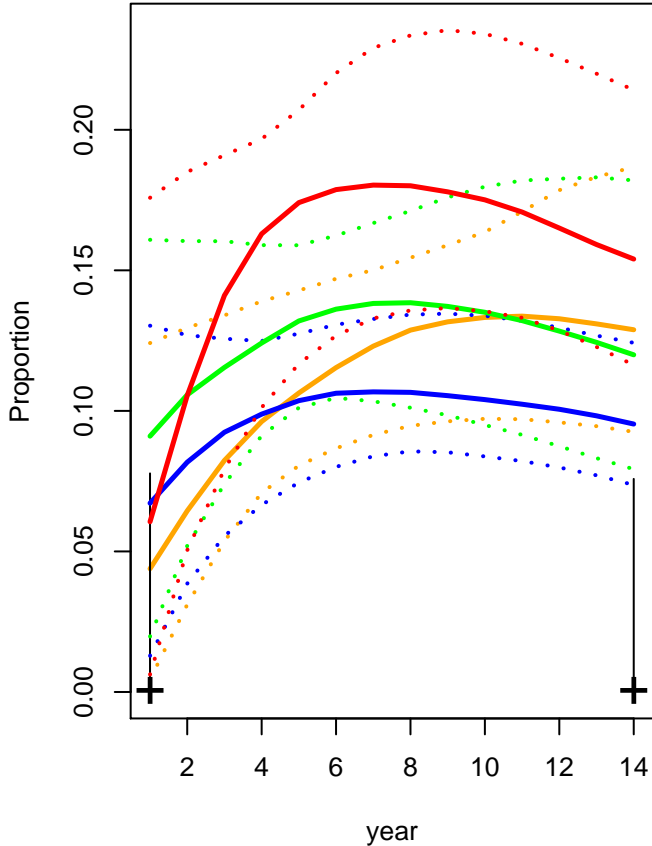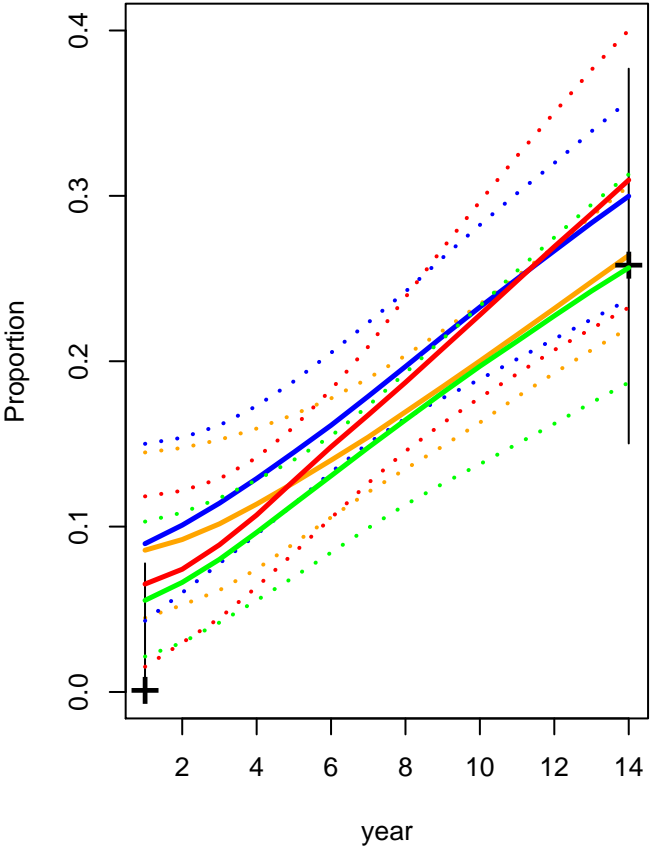

Uninfected

Site 82

Slight Infection

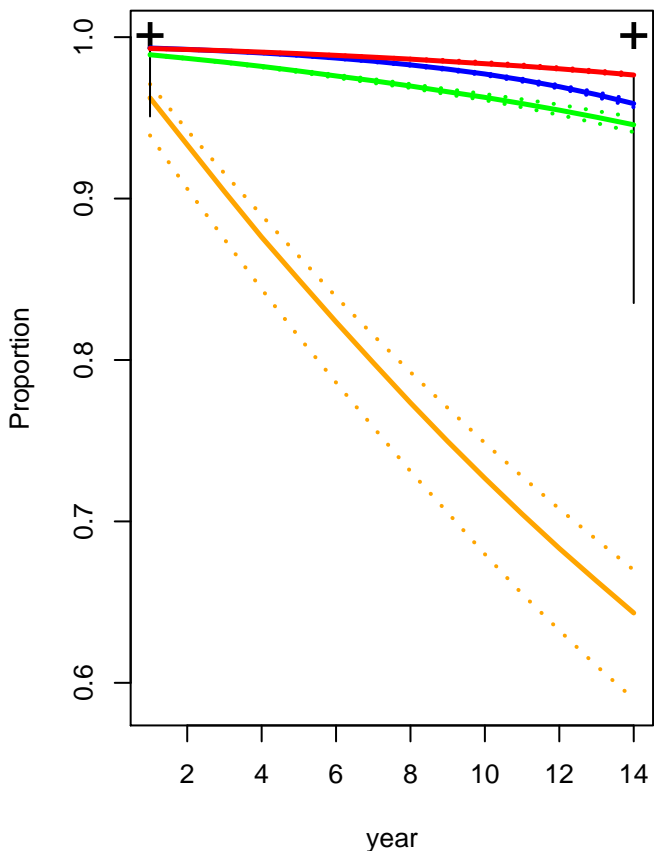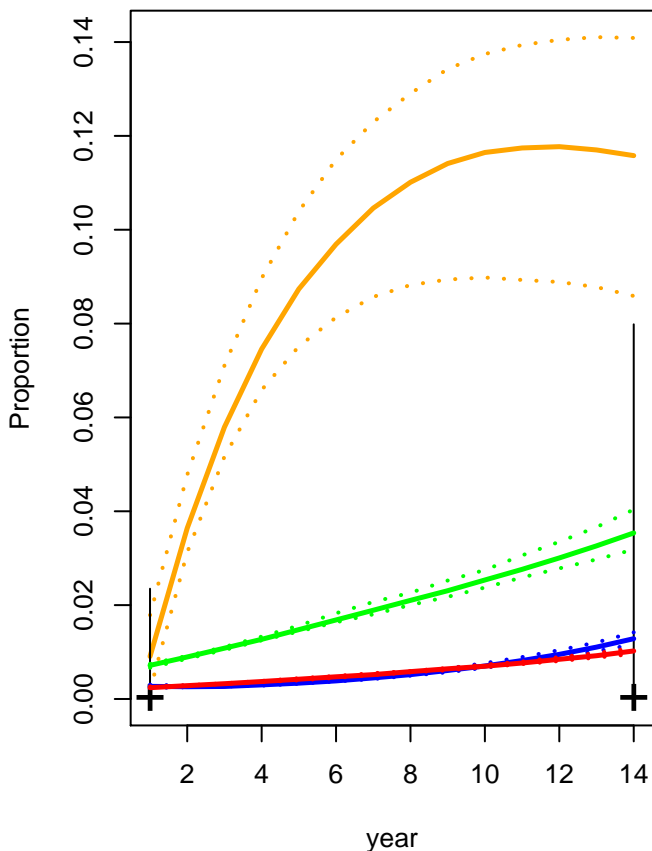

Moderate Infection

Dead

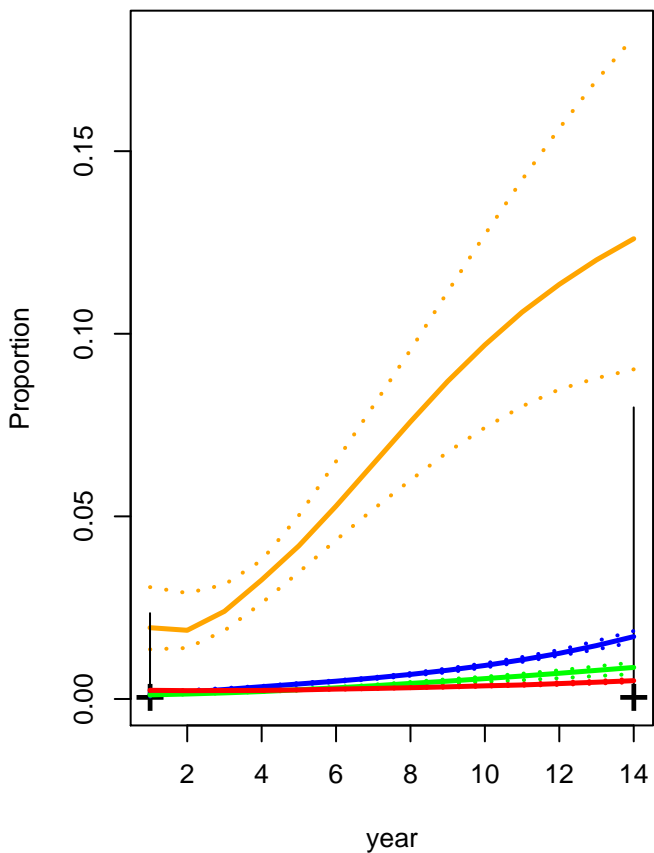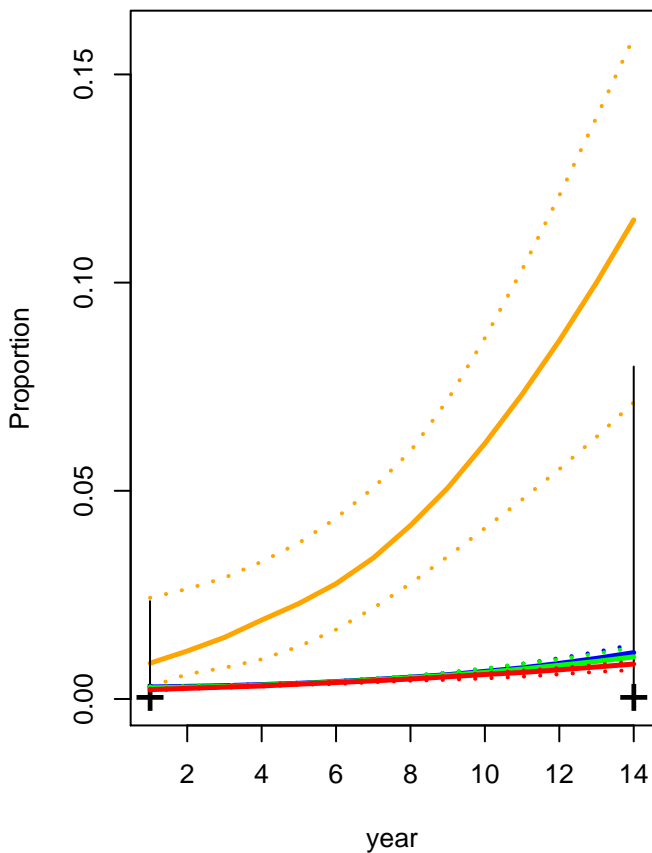

Uninfected

Site 83

Slight Infection

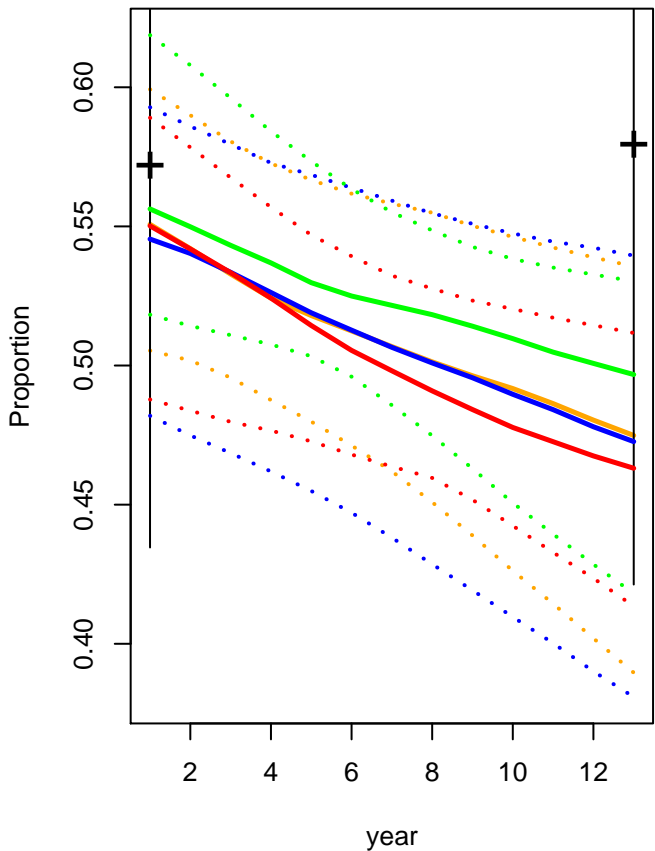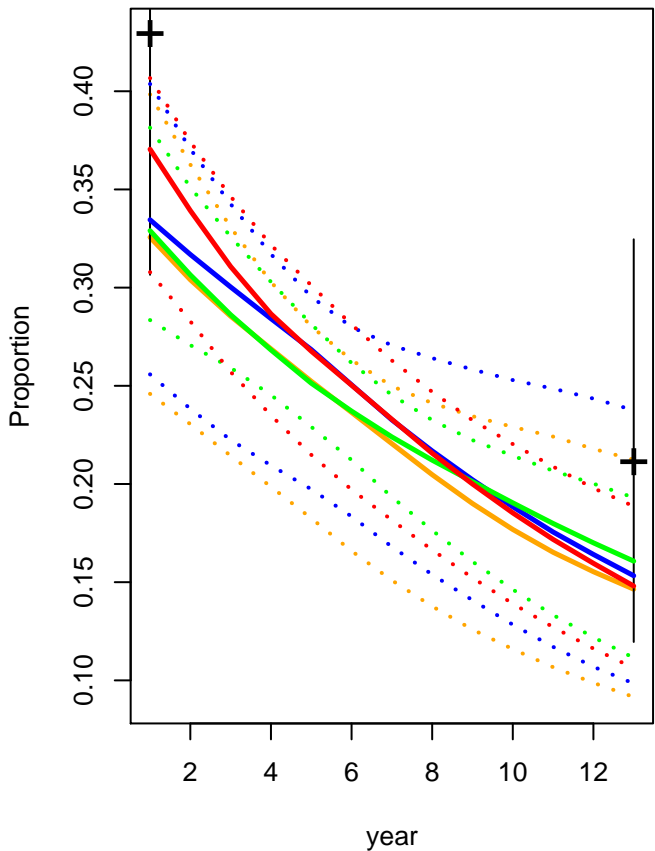

Moderate Infection

Dead

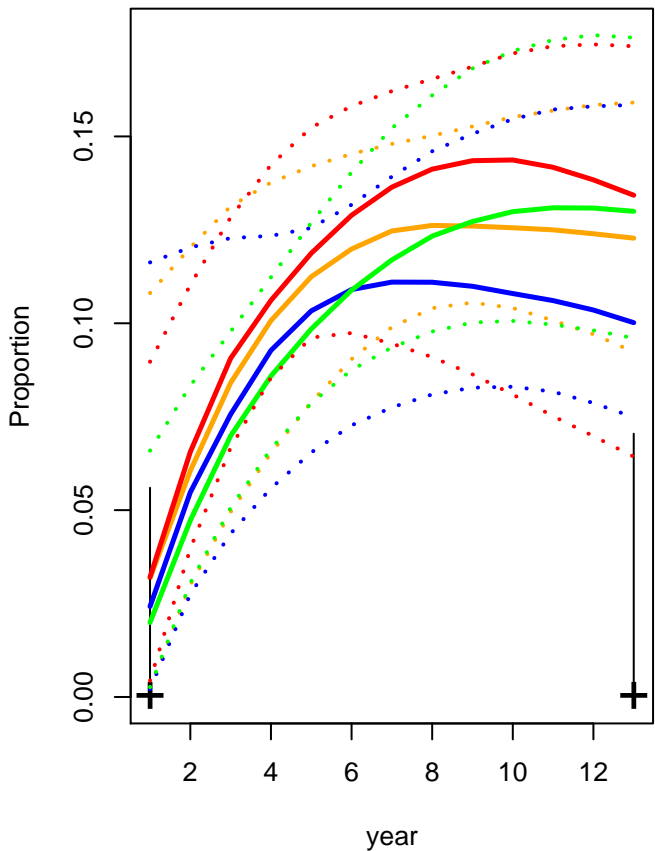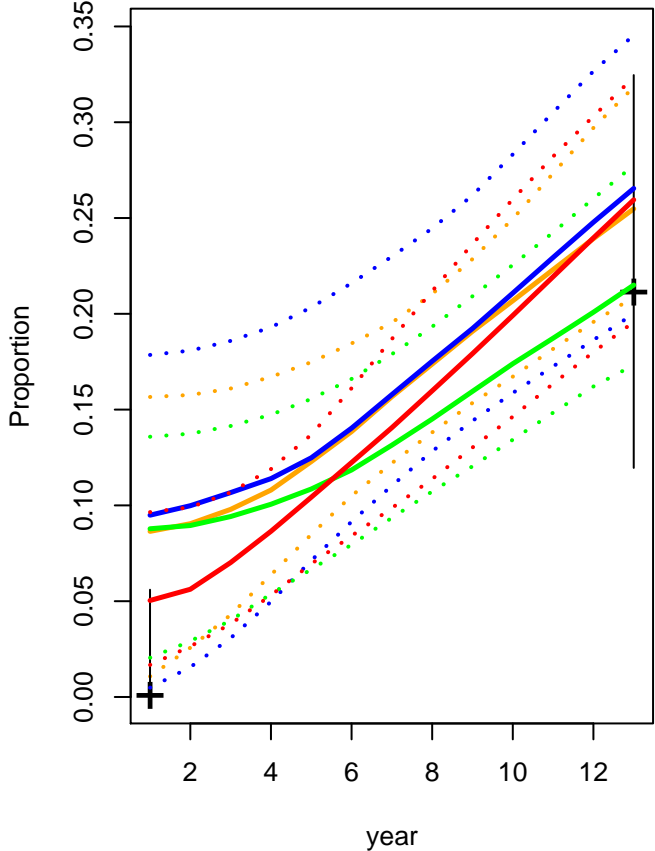

Uninfected

Site 84

Slight Infection

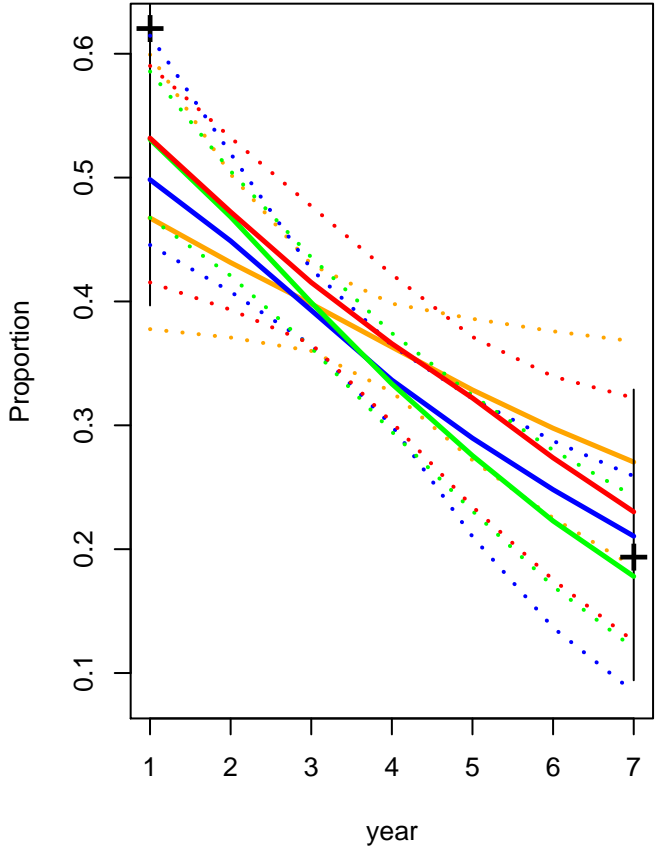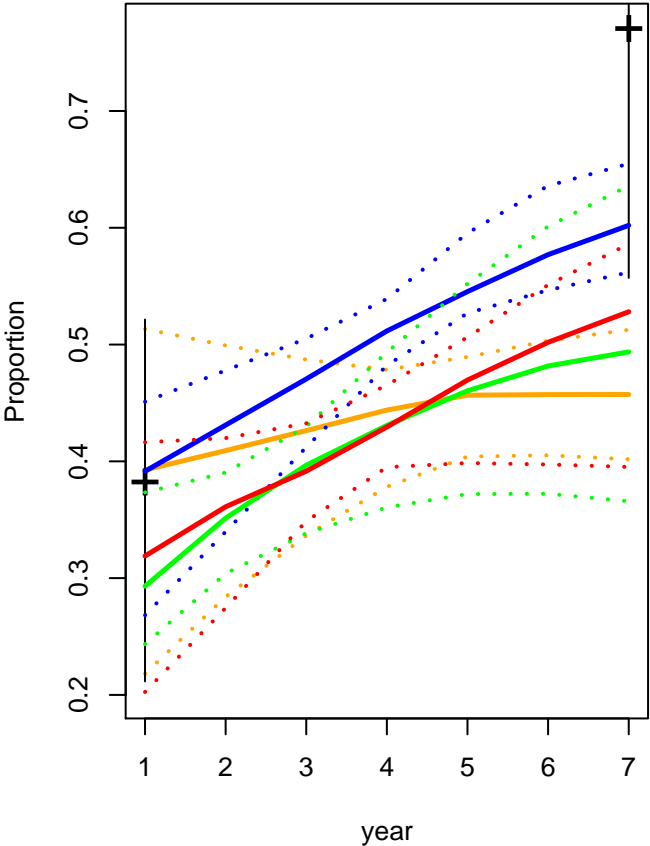

Moderate Infection

Dead

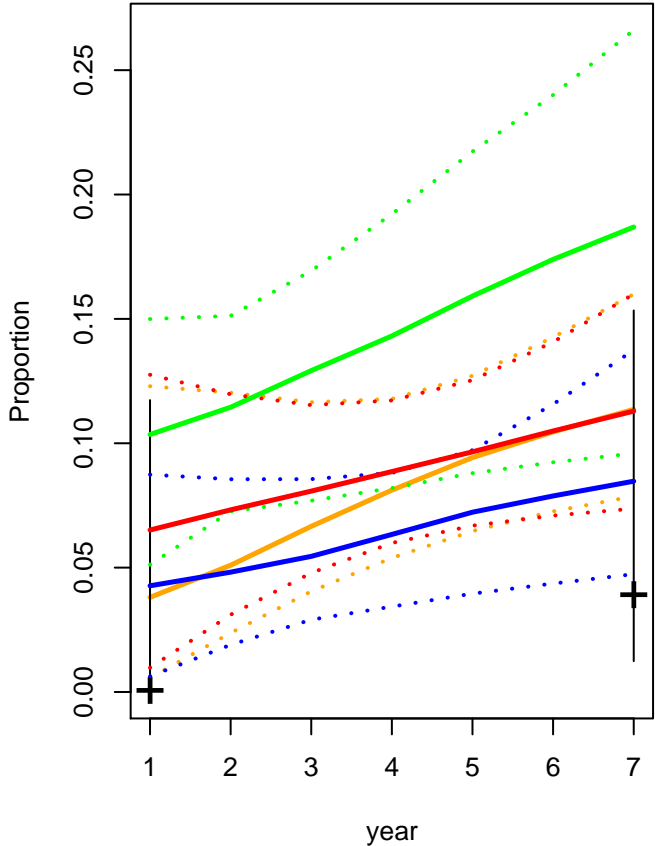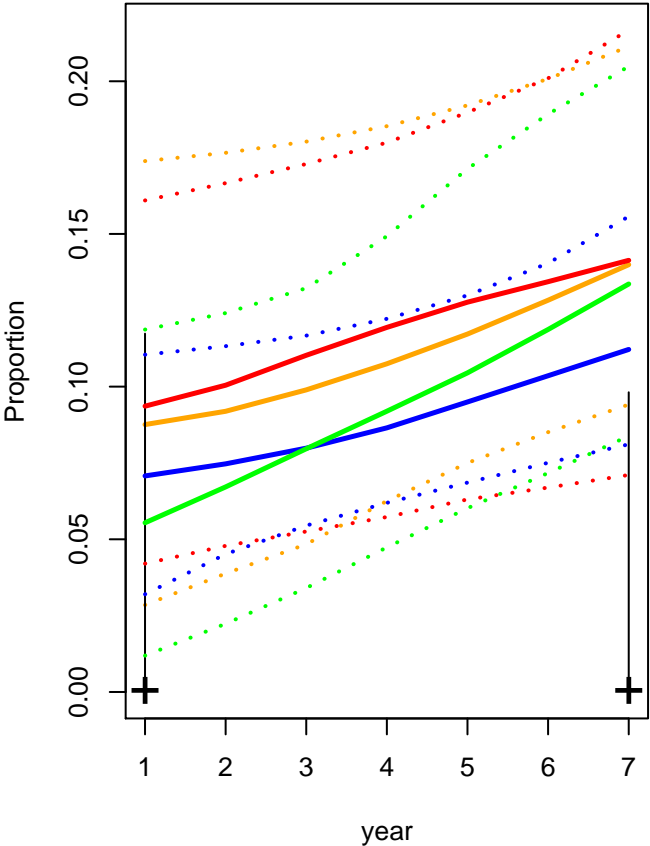

Uninfected

Site 85

Slight Infection

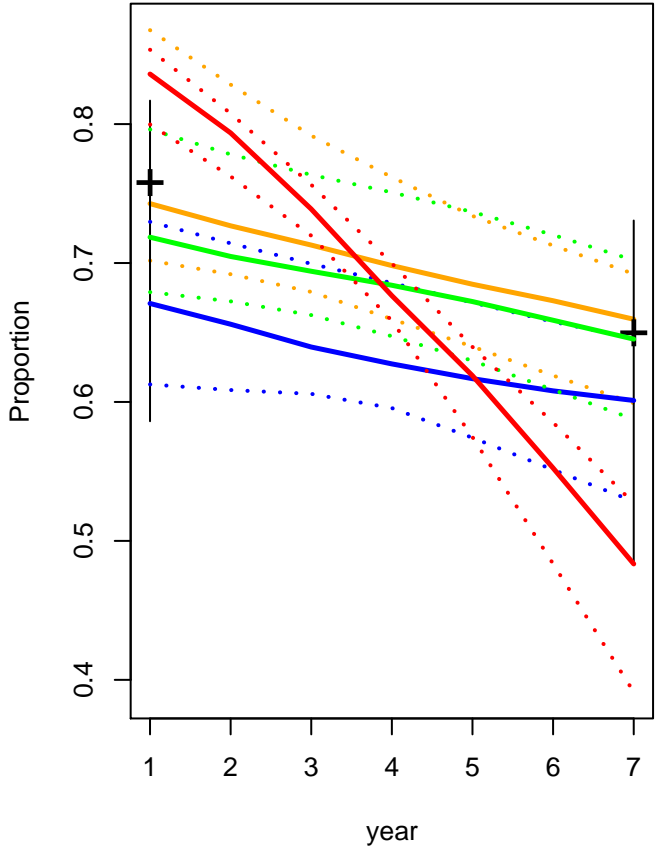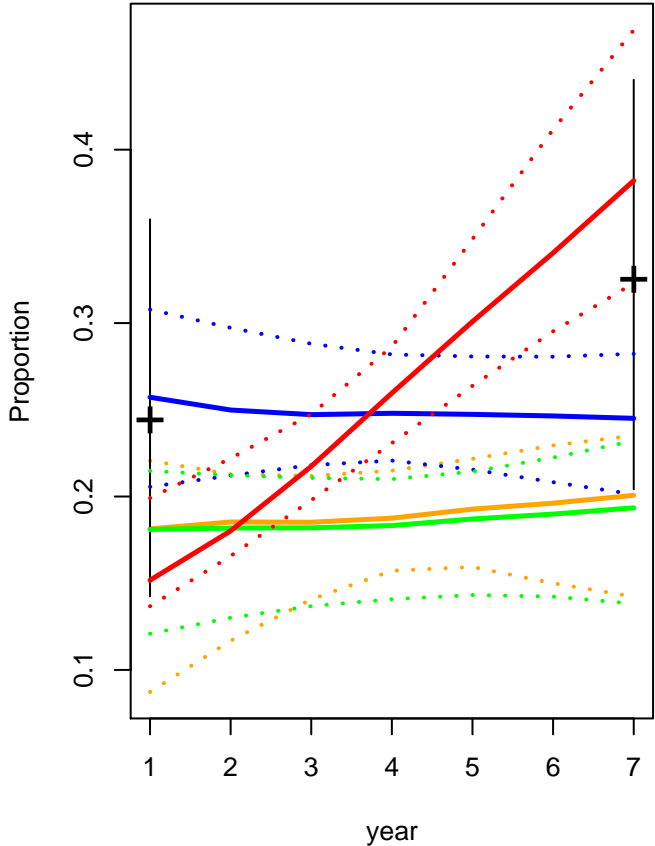

Moderate Infection

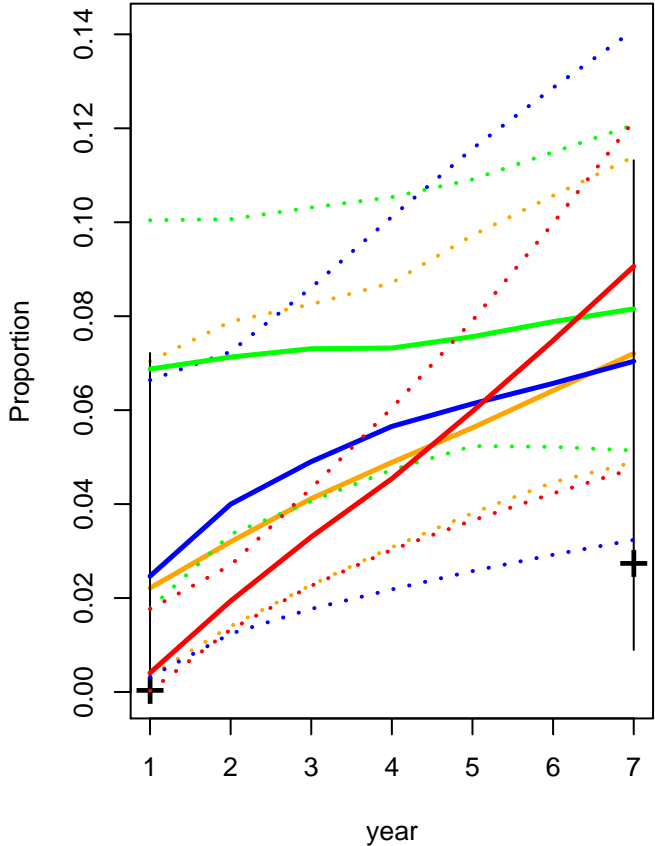

Dead

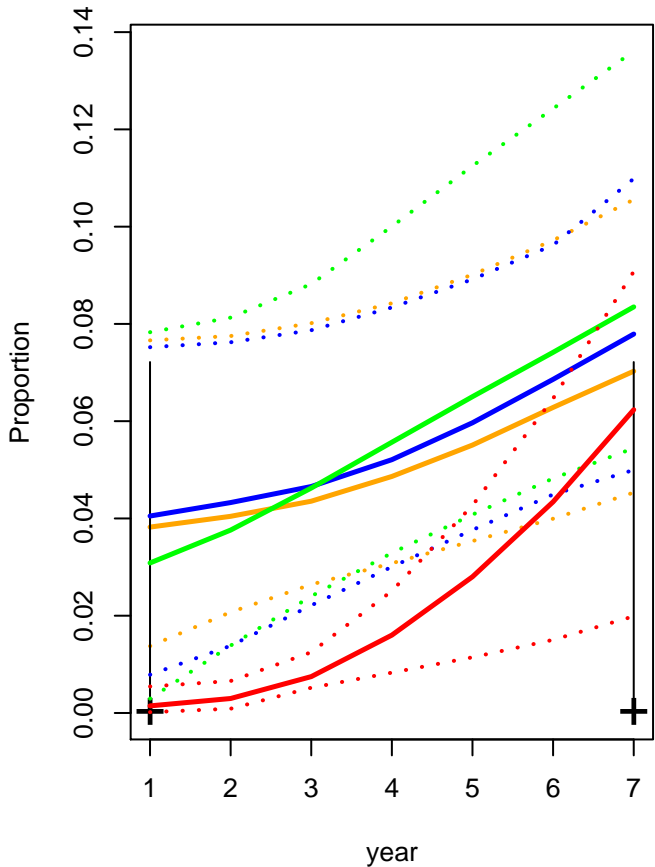

Uninfected

Site 86

Slight Infection

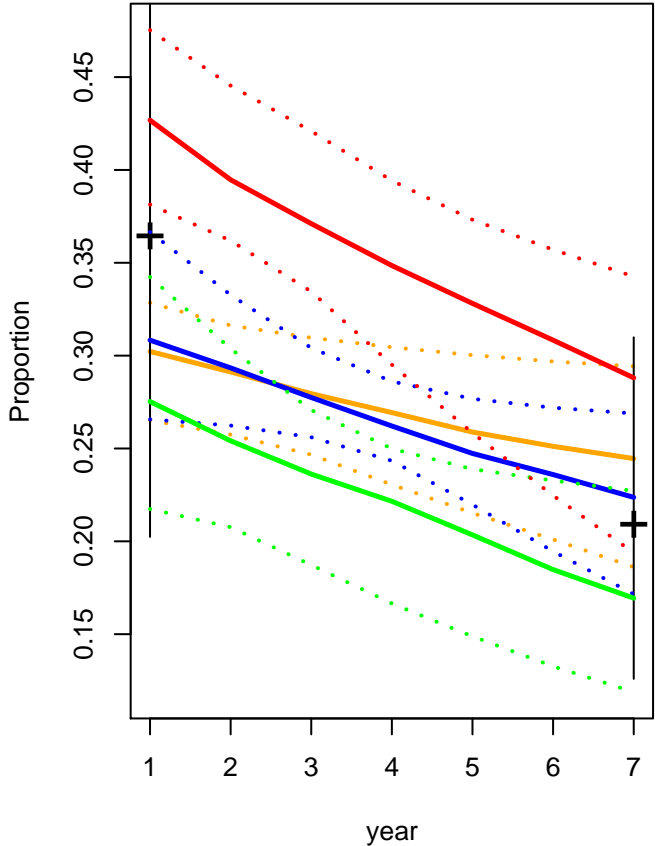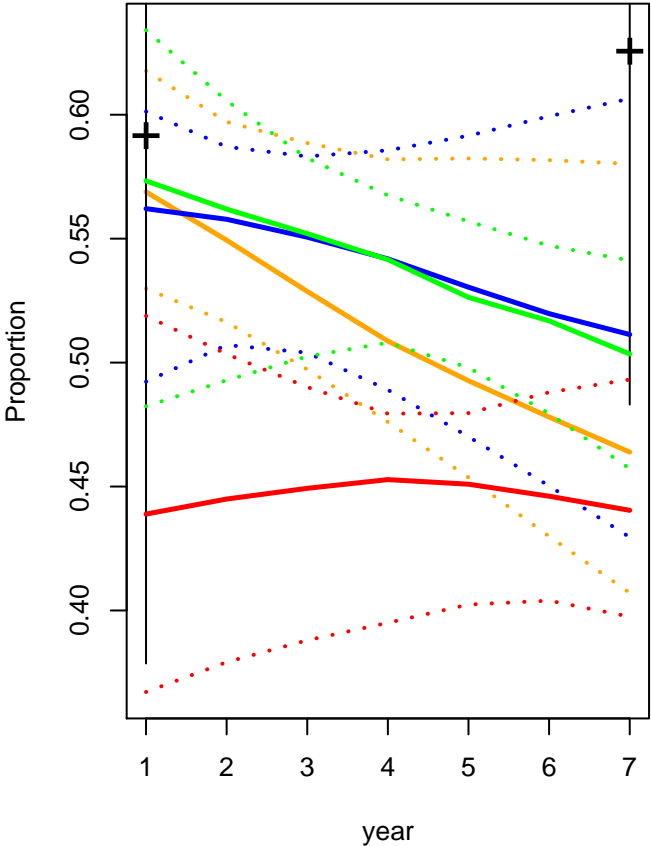

Moderate Infection

Dead

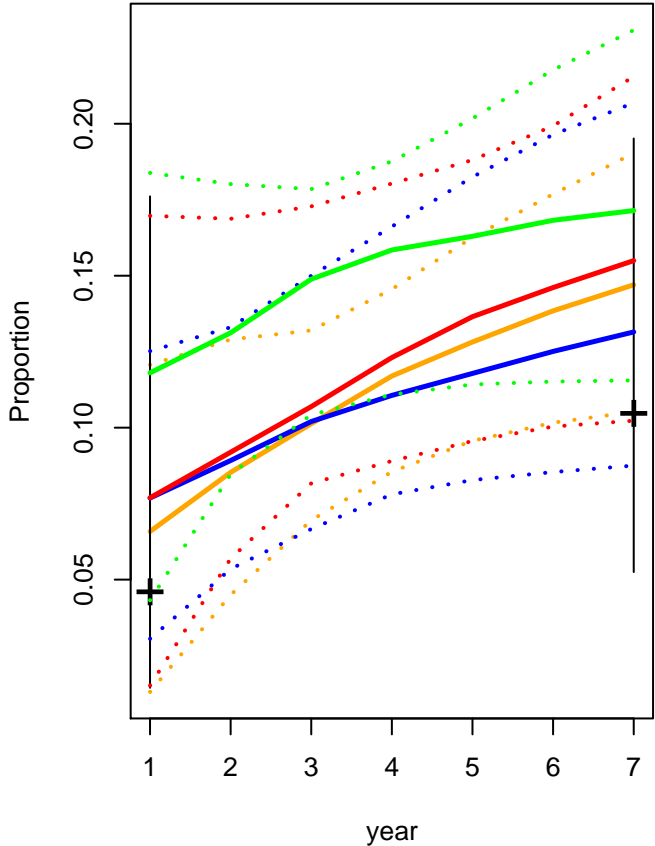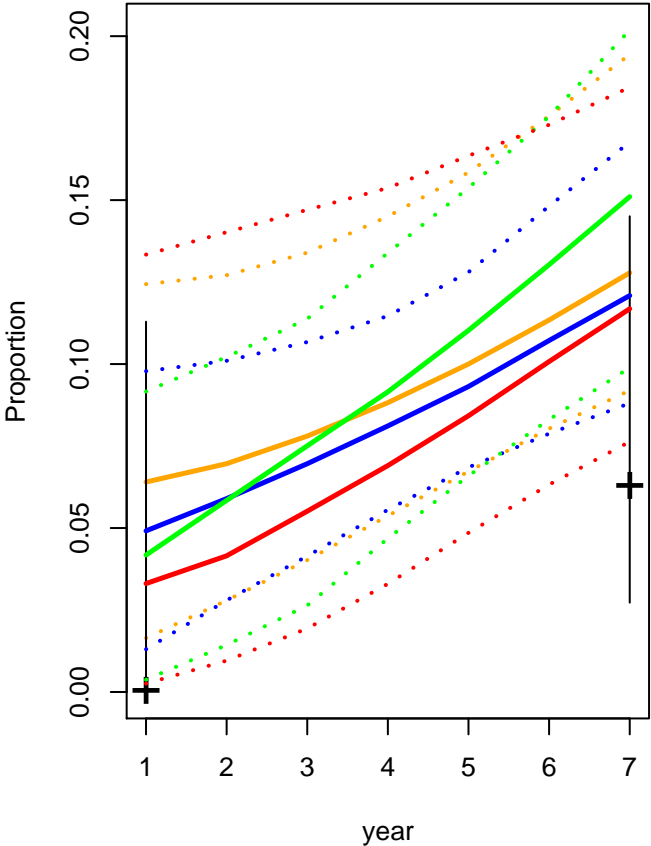



Uninfected

Site 87

Slight Infection

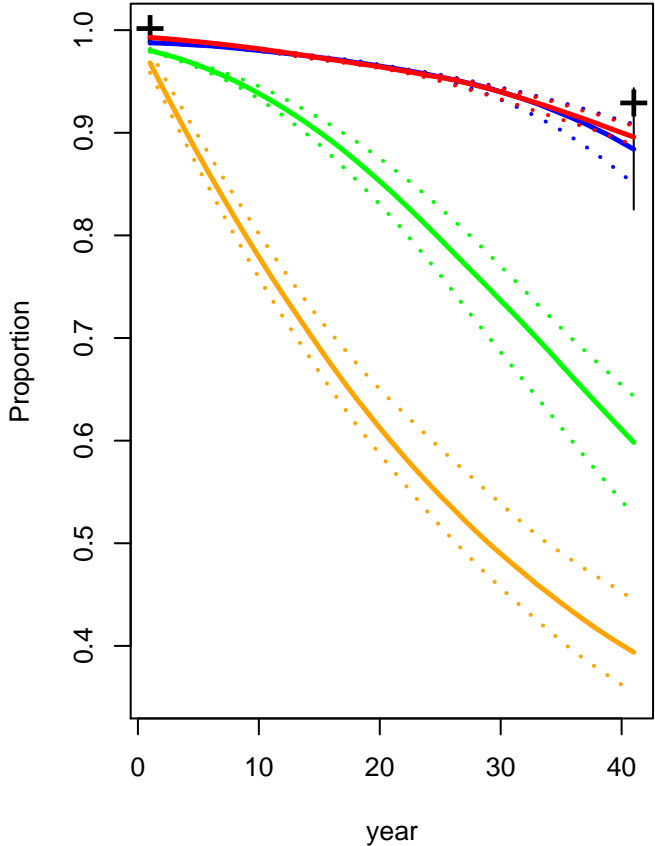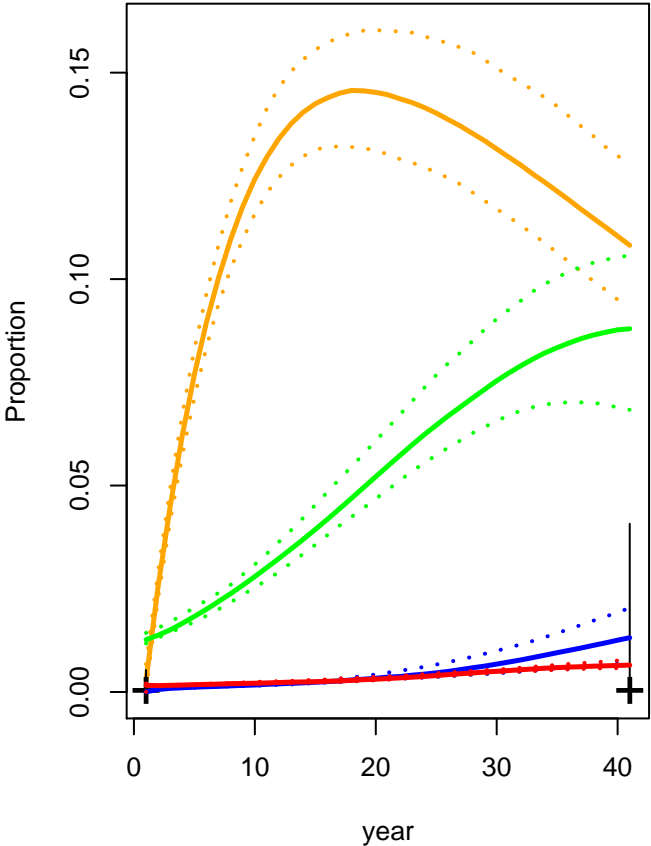

Moderate Infection

Dead

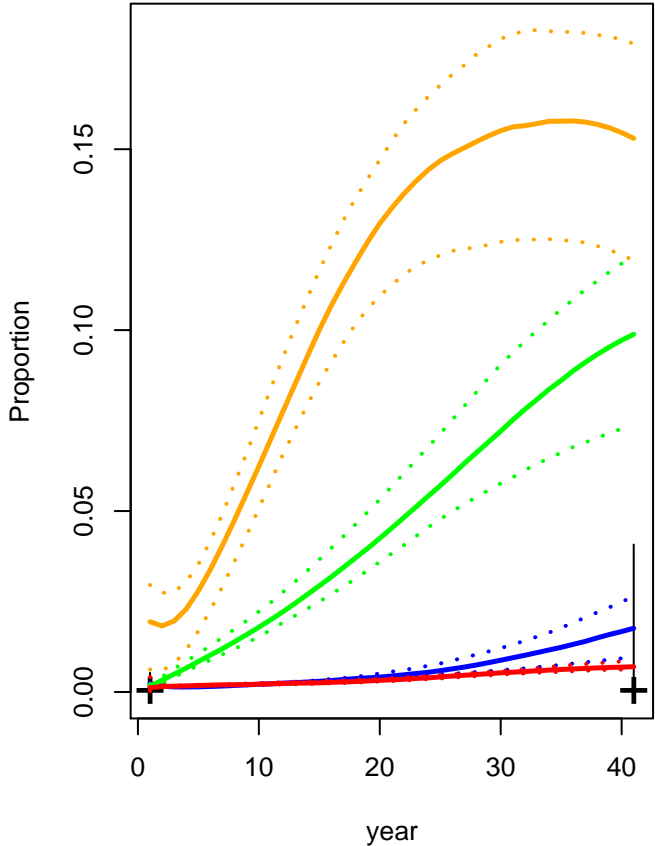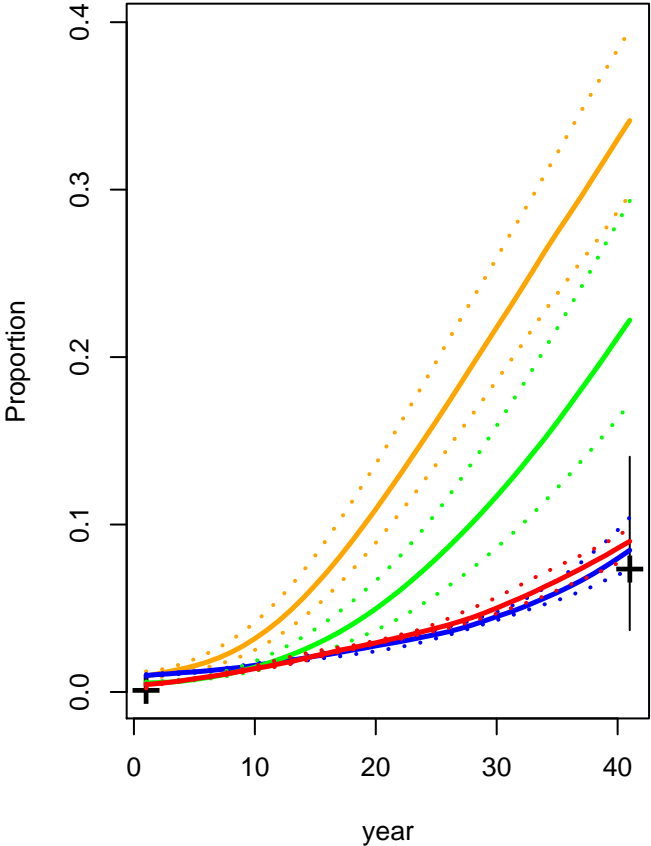

Uninfected

Site 88

Slight Infection

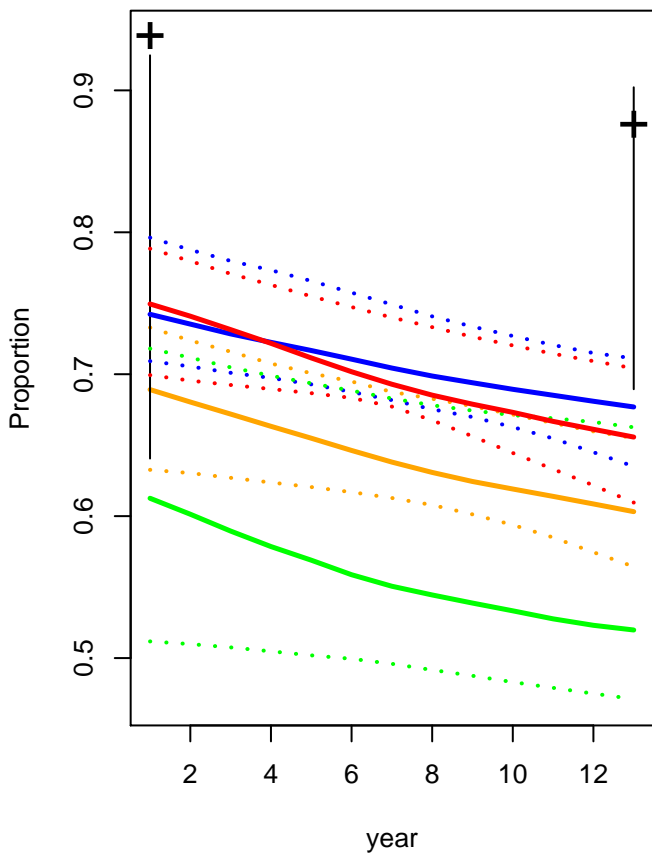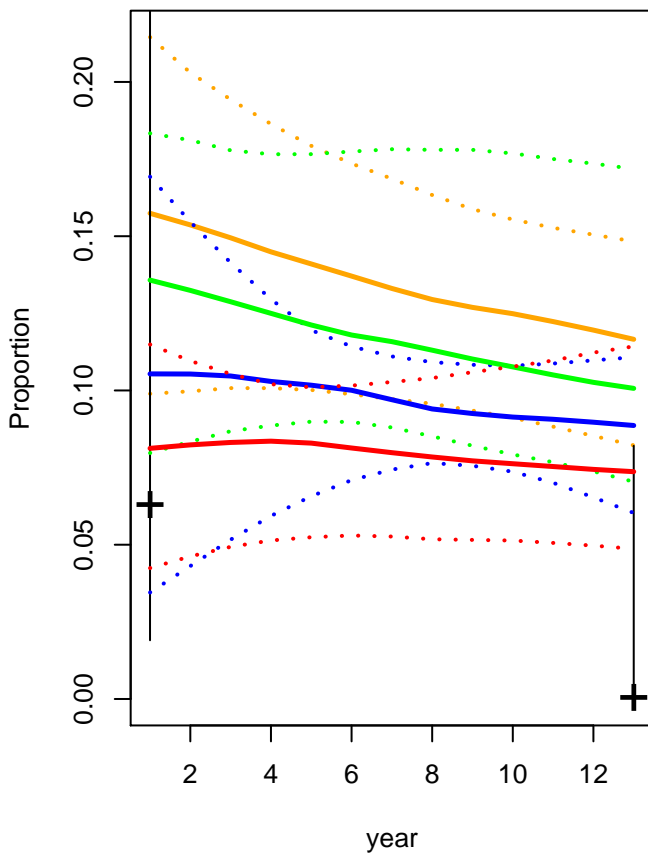

Moderate Infection

Dead

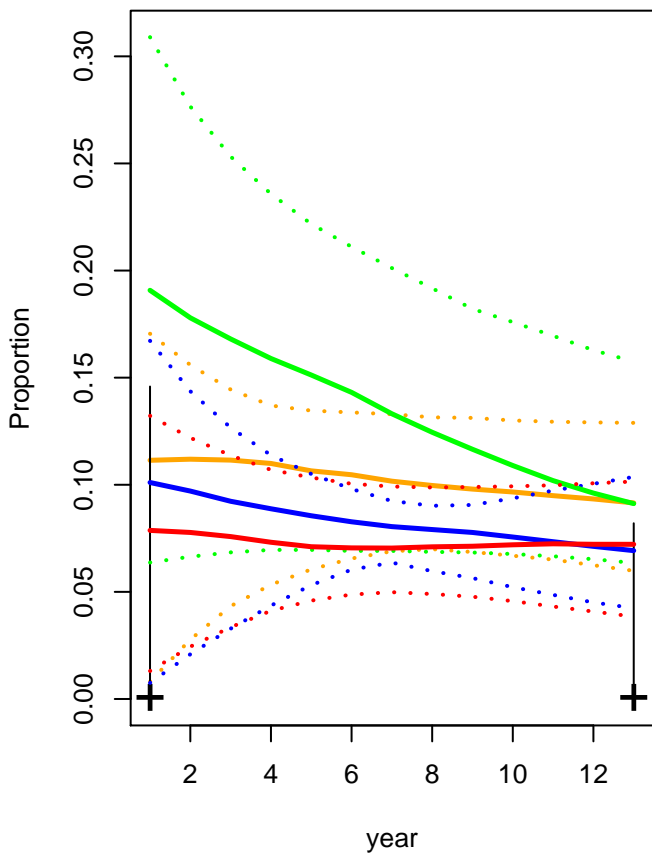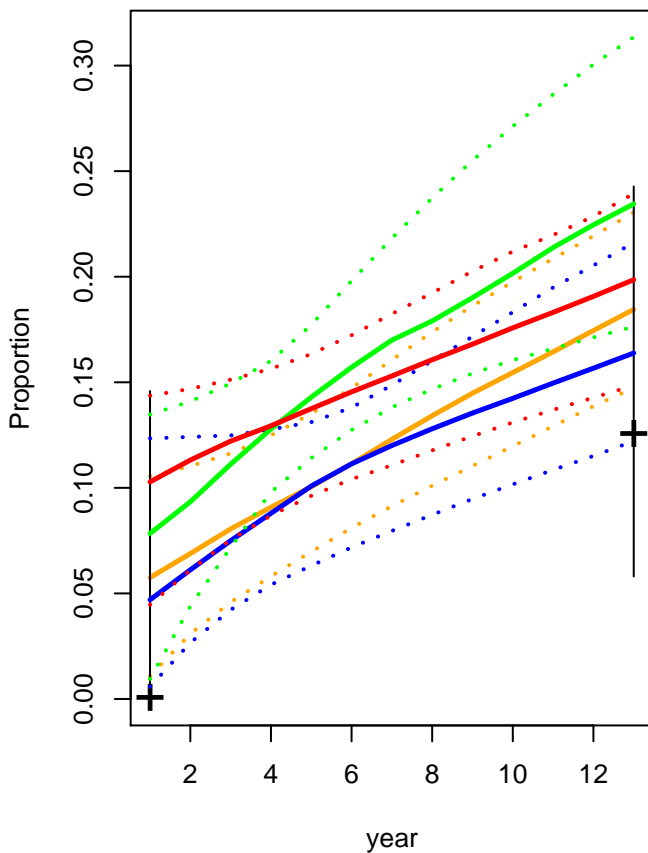

Uninfected

Site 89

Slight Infection

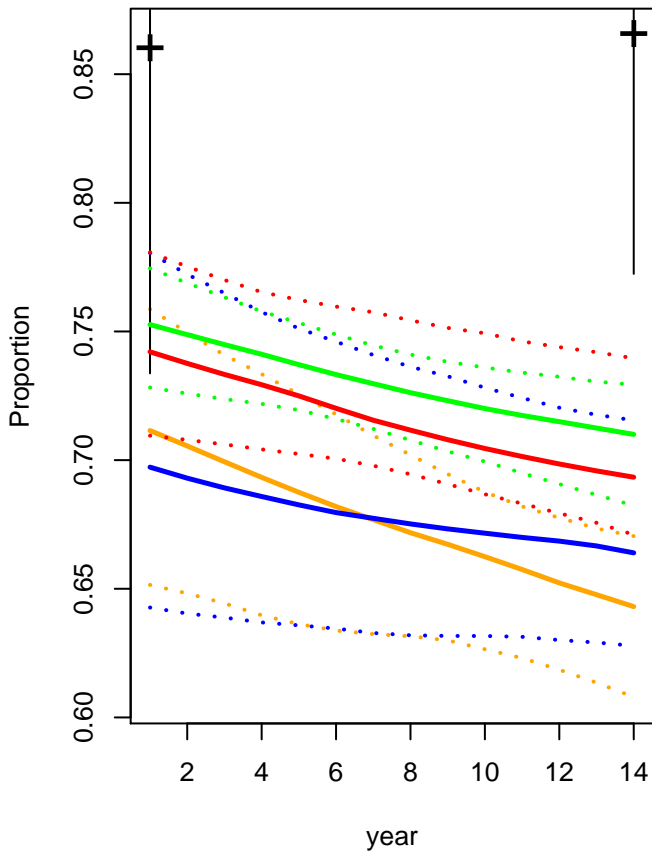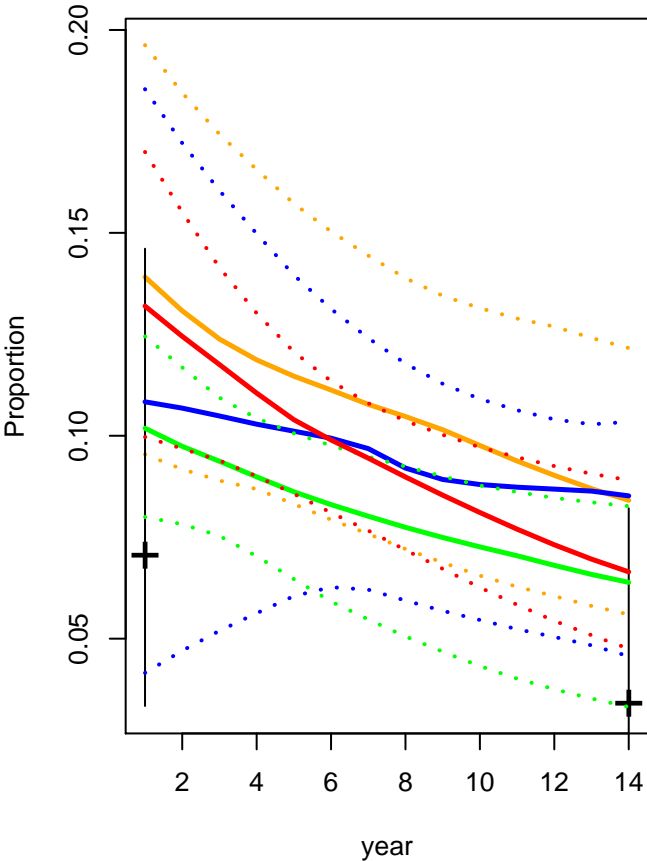

Moderate Infection

Dead

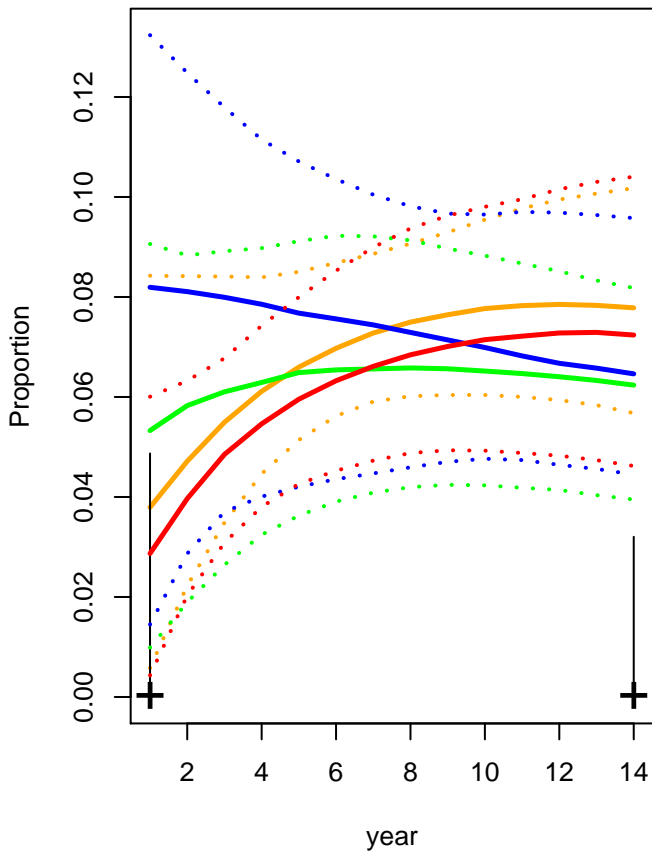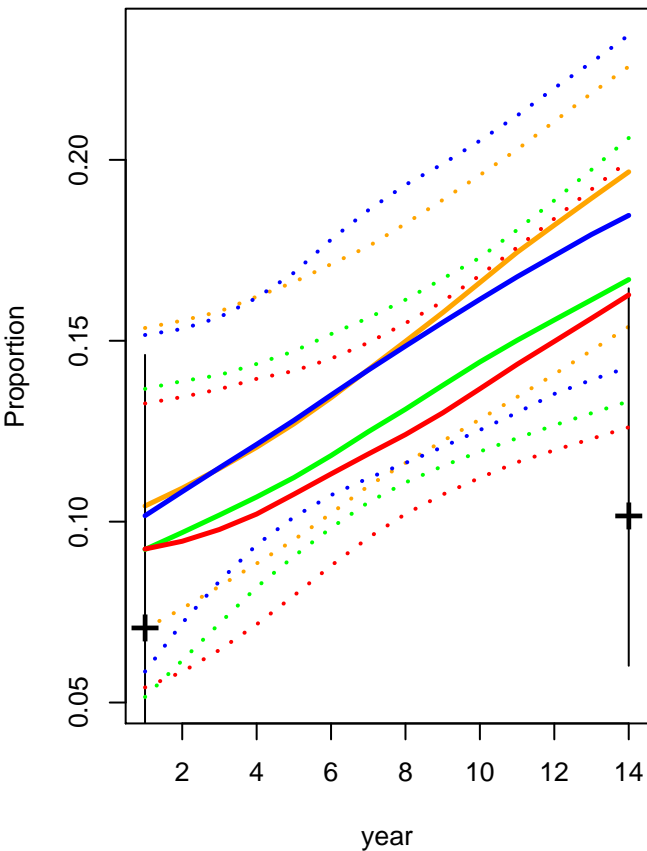

Uninfected

Site 90

Slight Infection

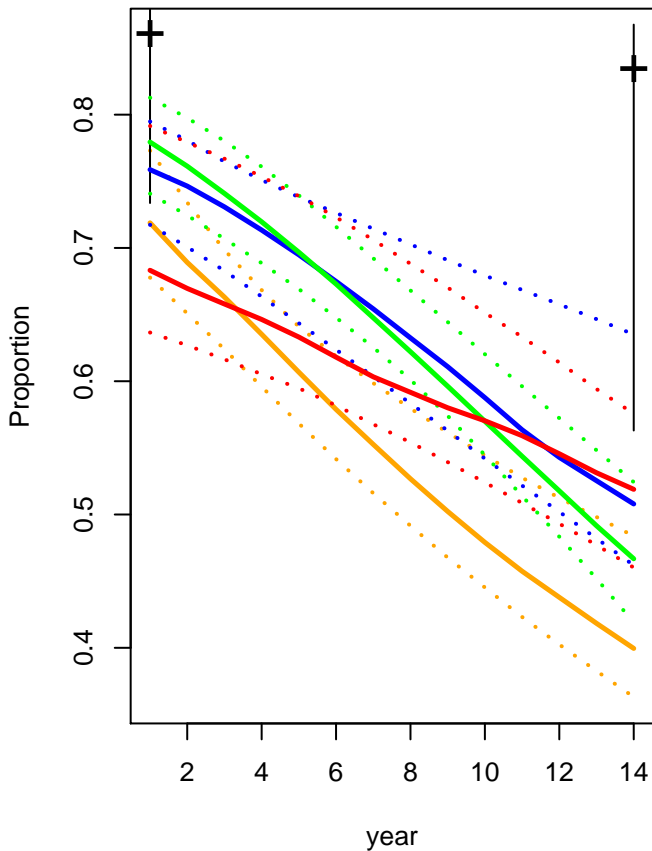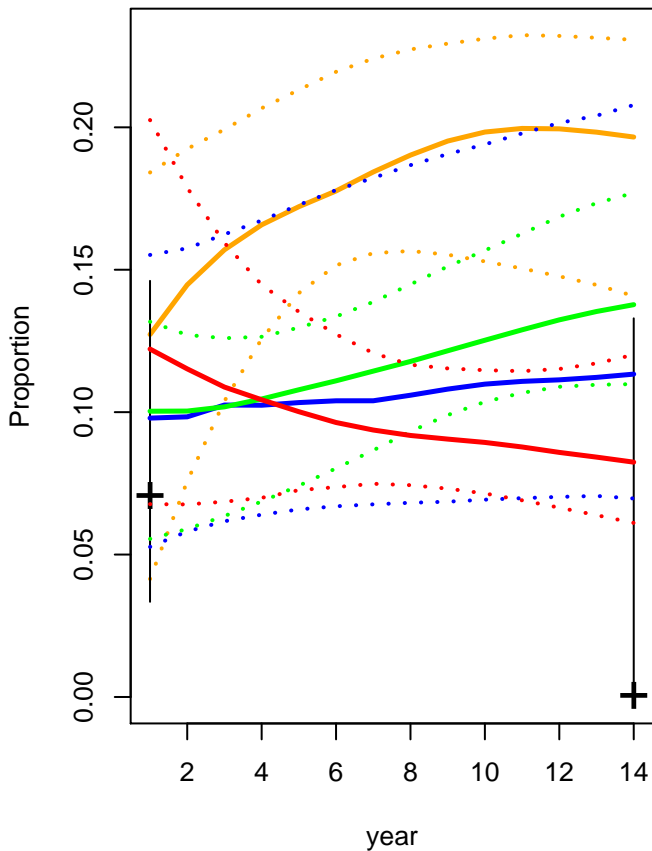

Moderate Infection

Dead

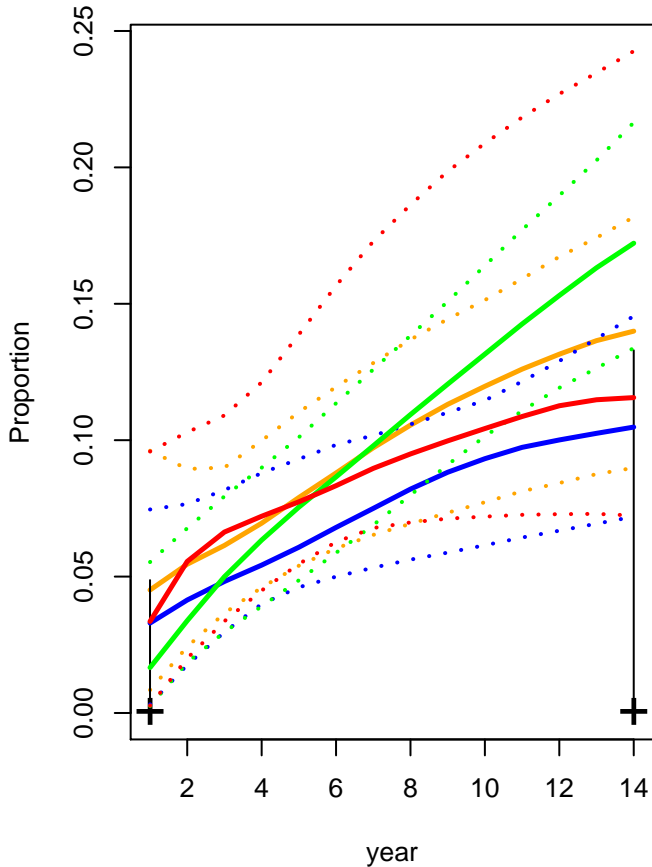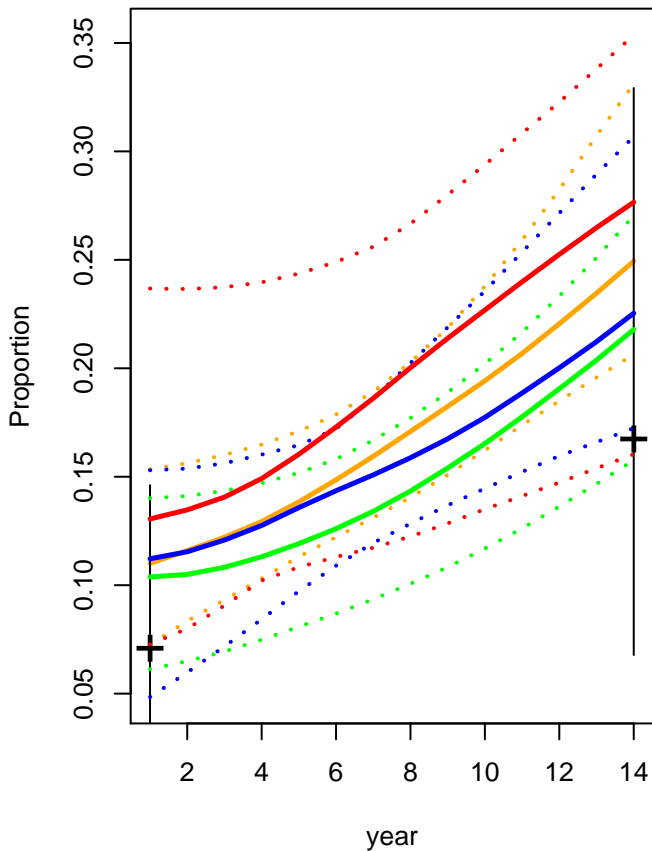

Uninfected

Site 91

Slight Infection

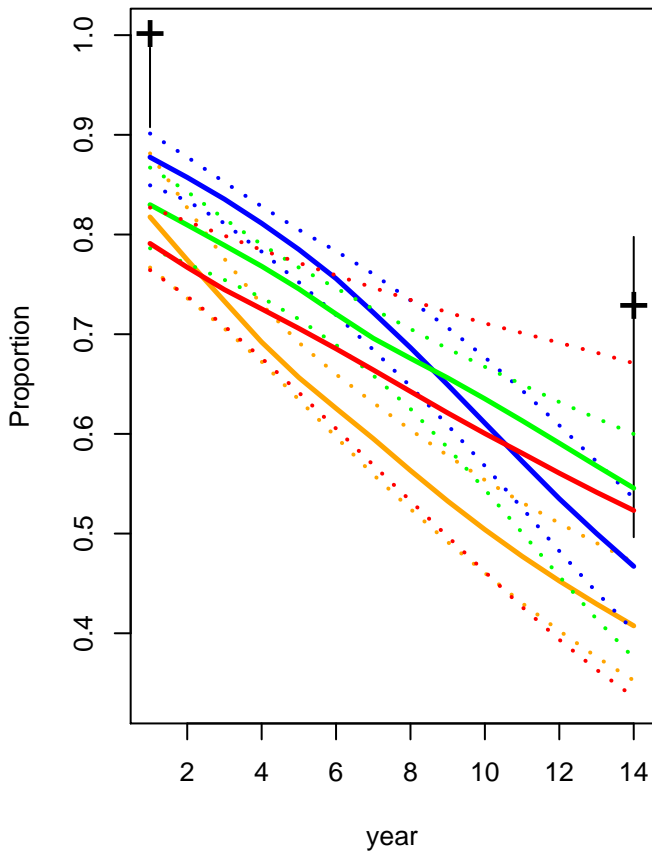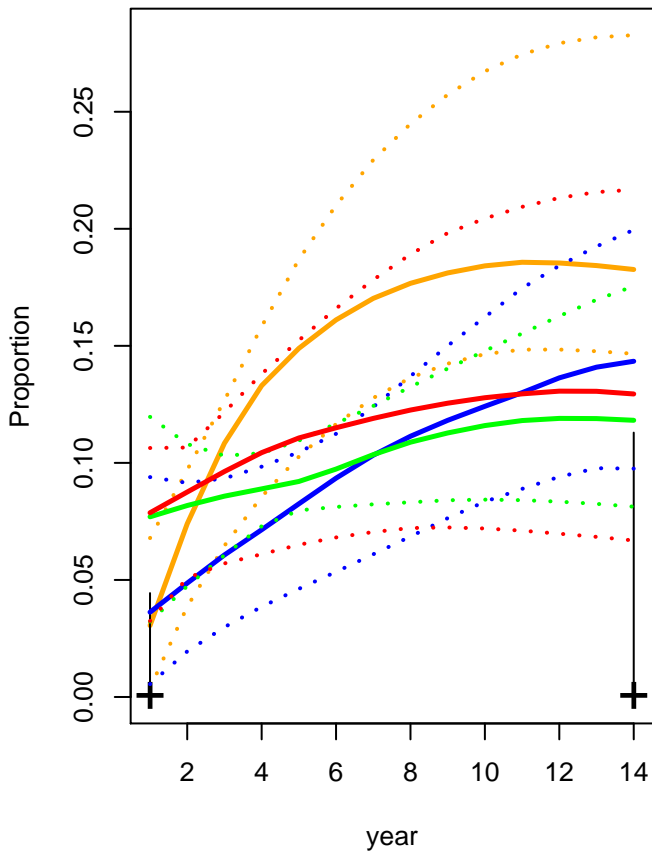

Moderate Infection

Dead

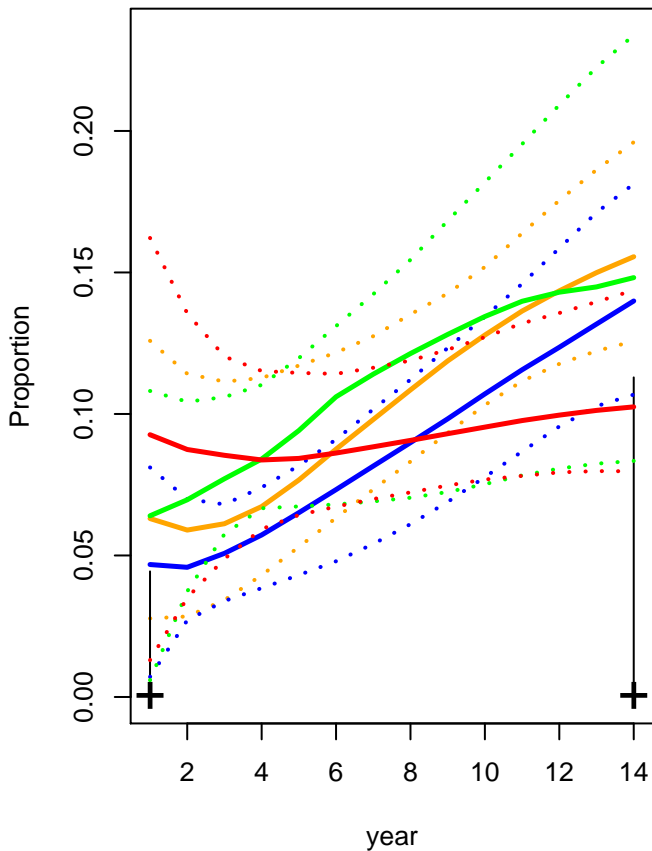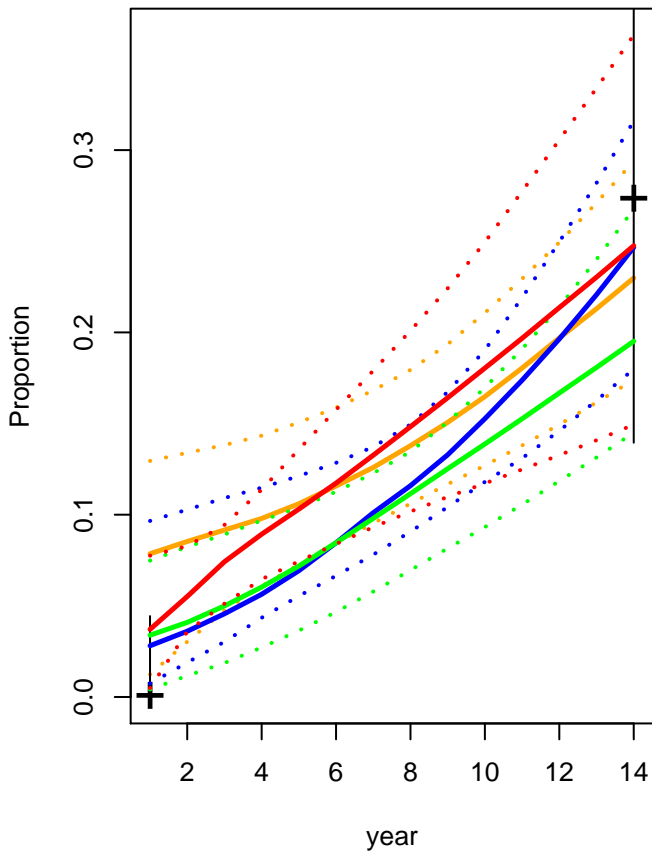

Uninfected

Site 92

Slight Infection

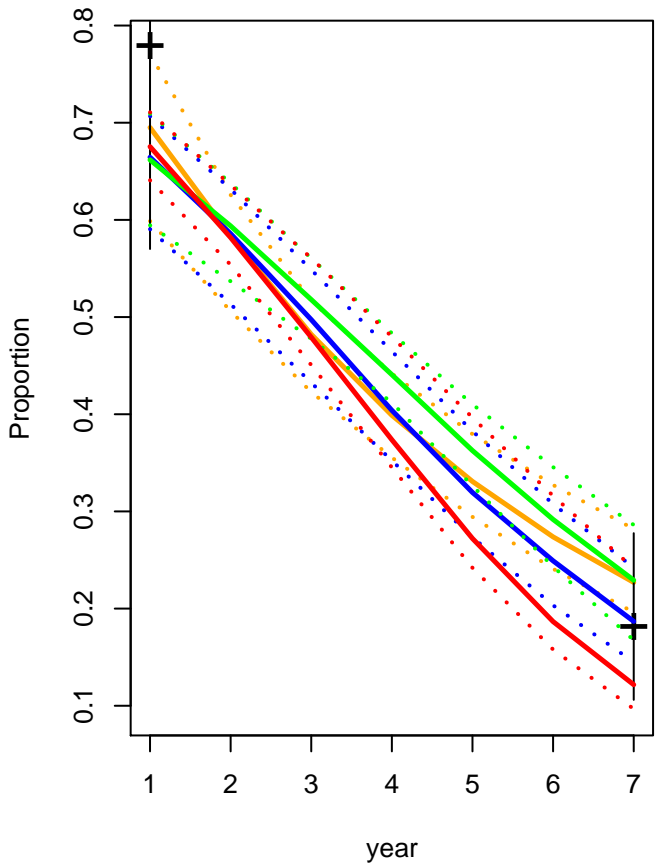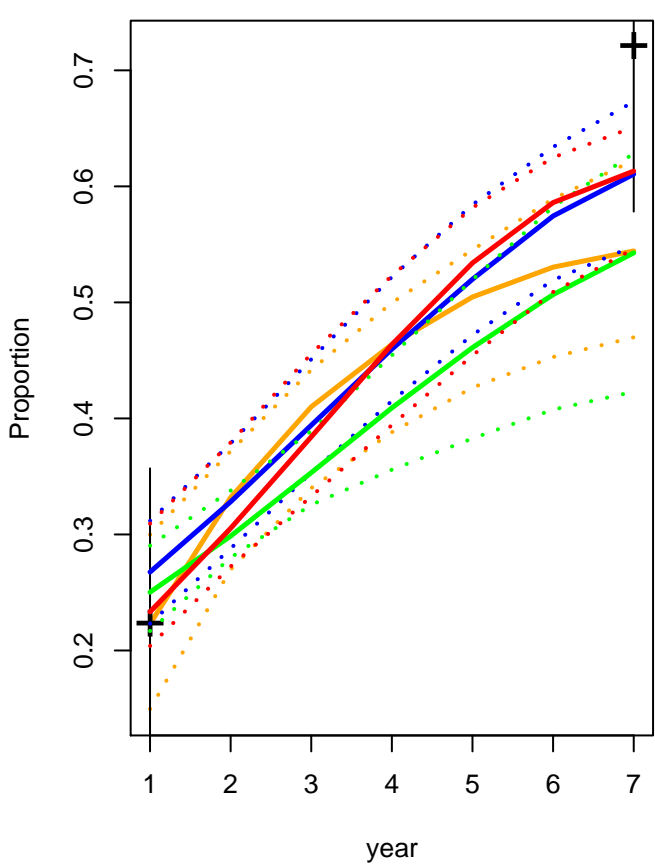

Moderate Infection

Dead

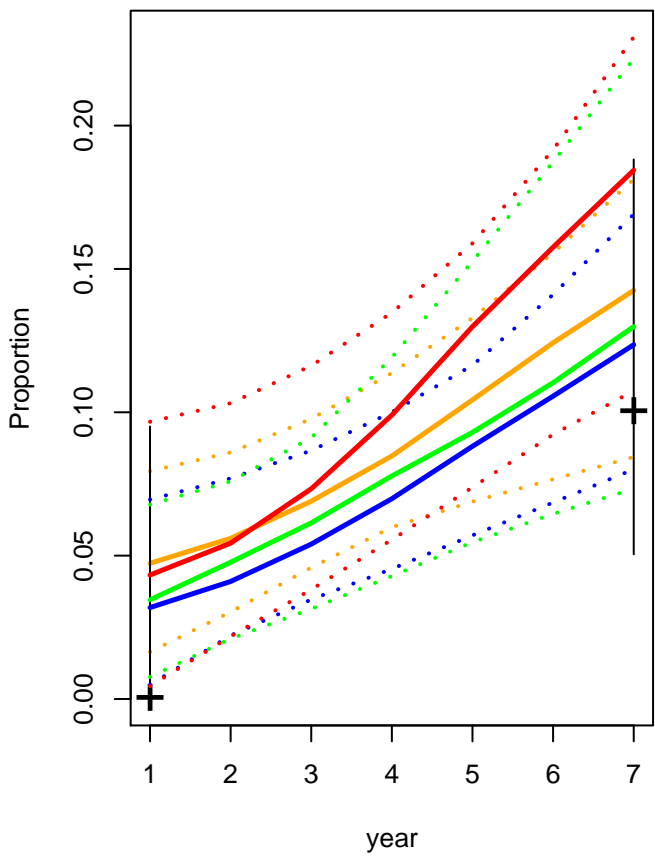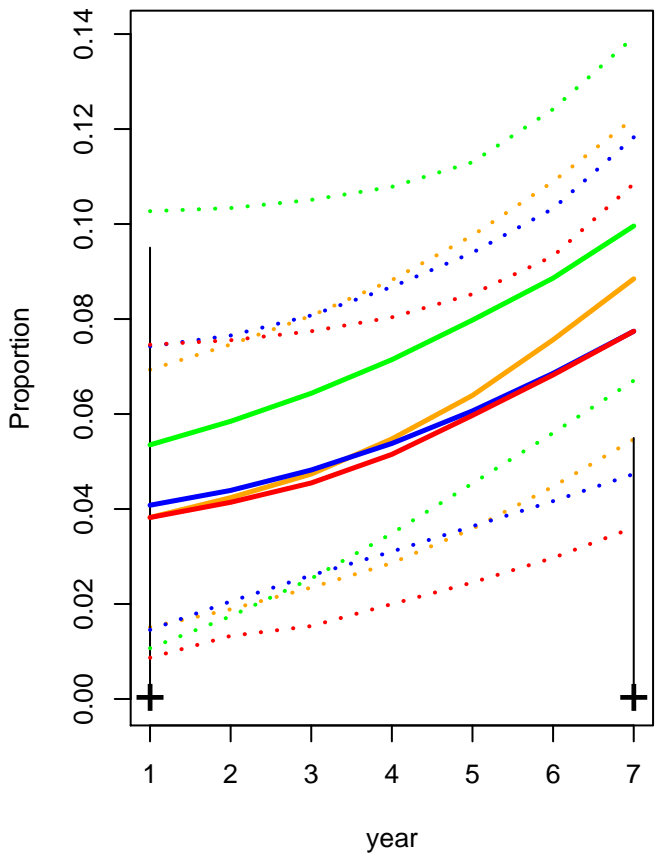

Uninfected

Site 93

Slight Infection

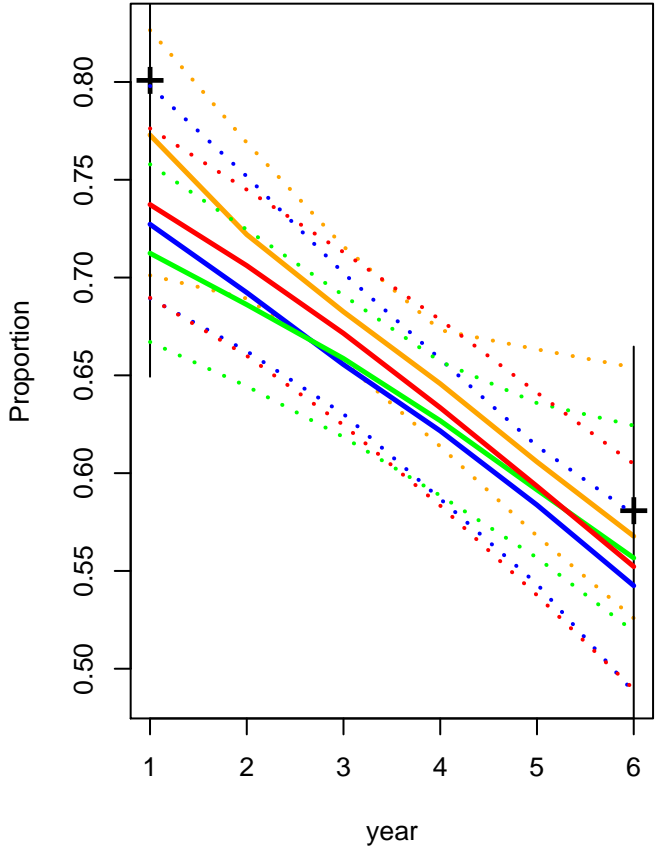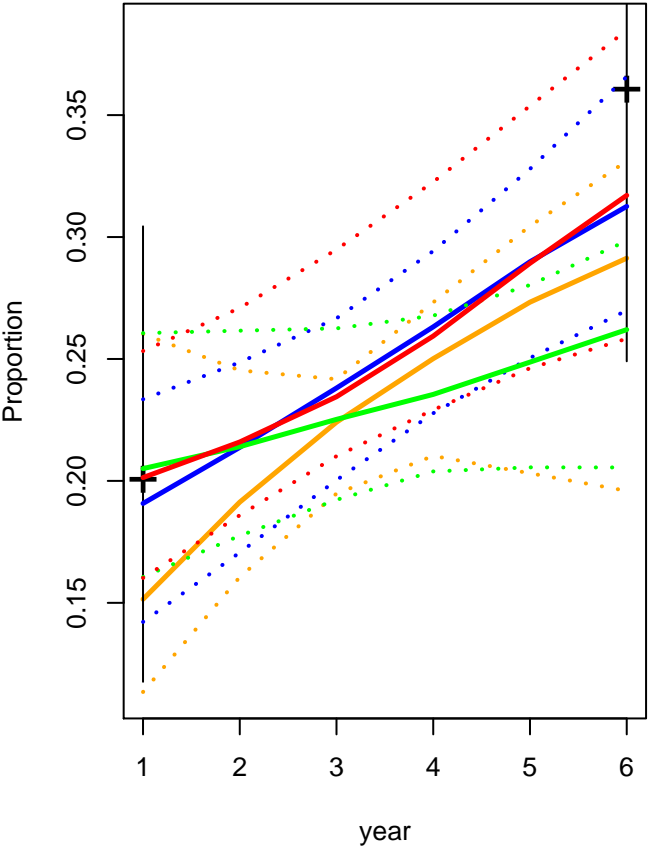

Moderate Infection

Dead

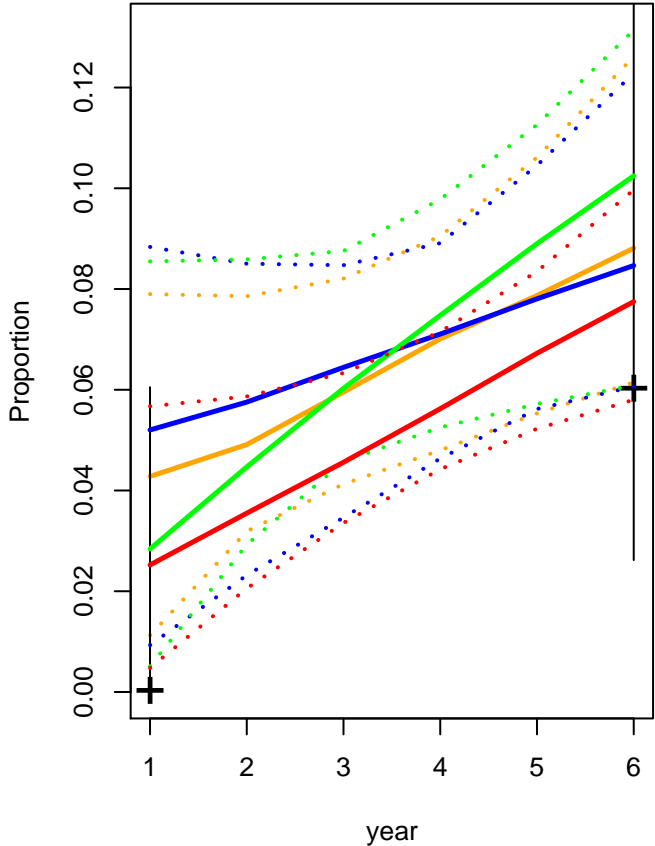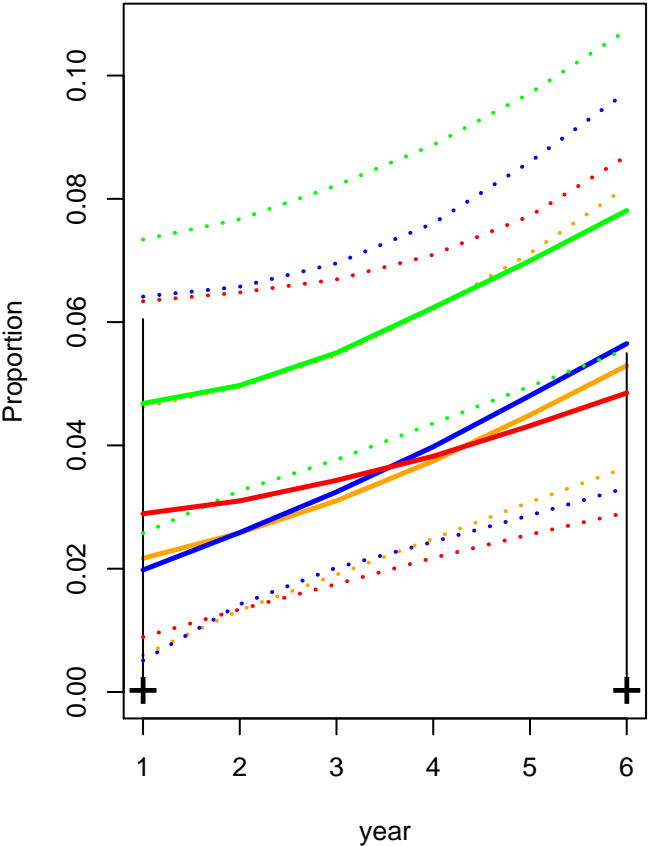

Uninfected

Site 94

Slight Infection

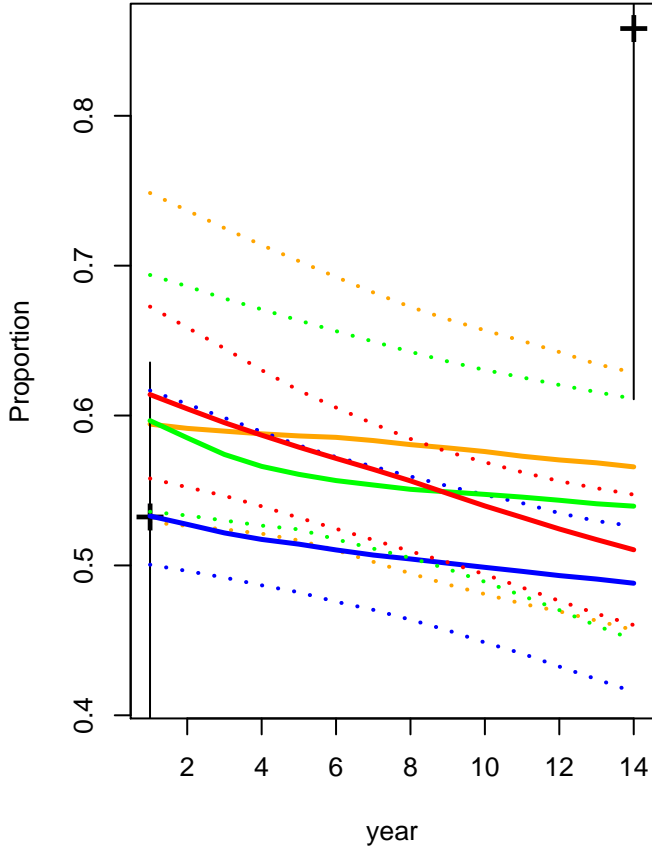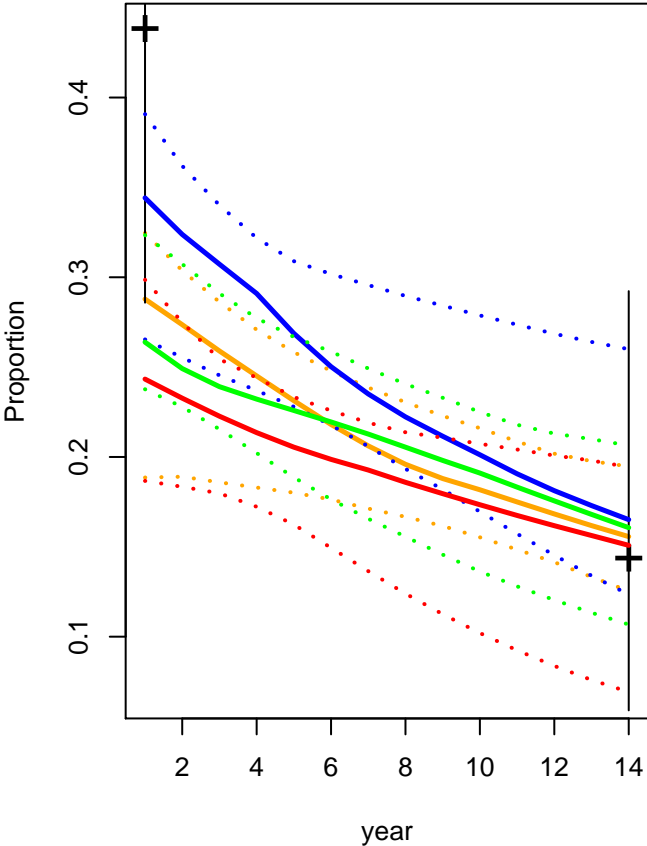

Moderate Infection

Dead

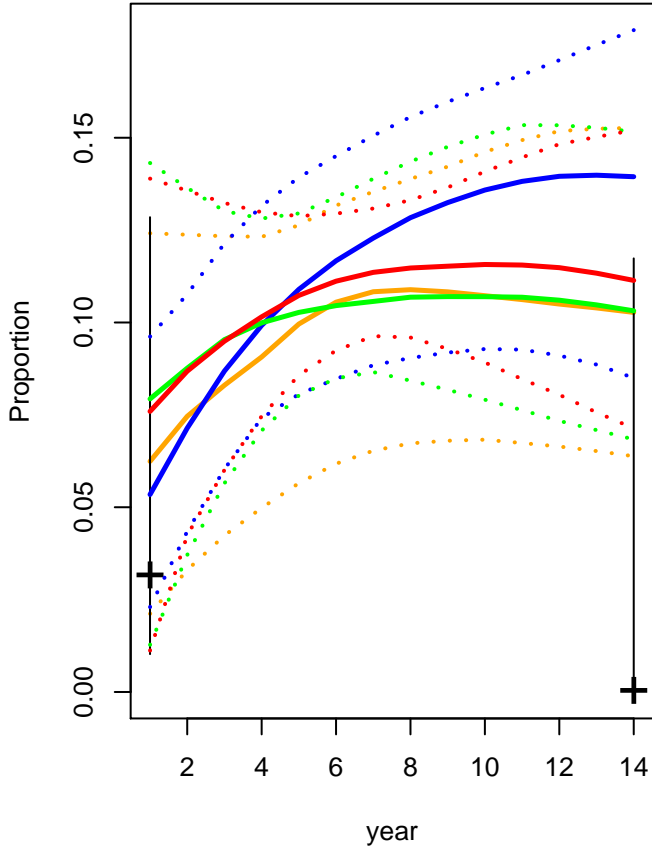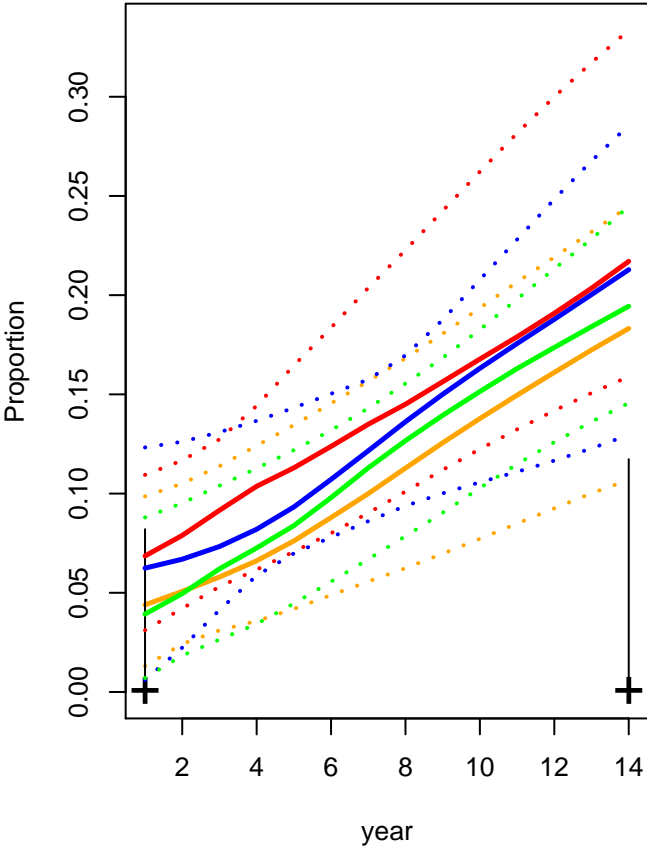



Uninfected

Site 95

Slight Infection

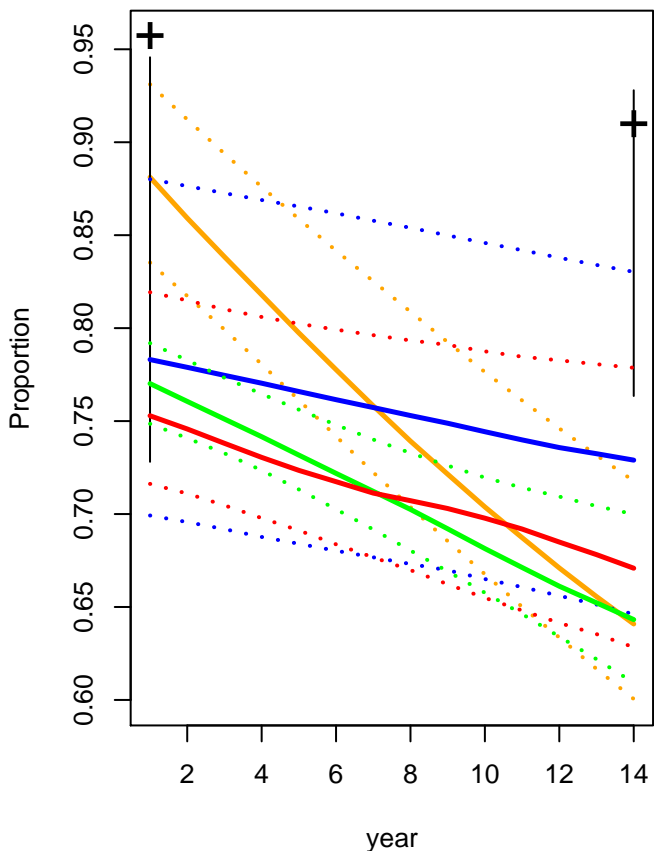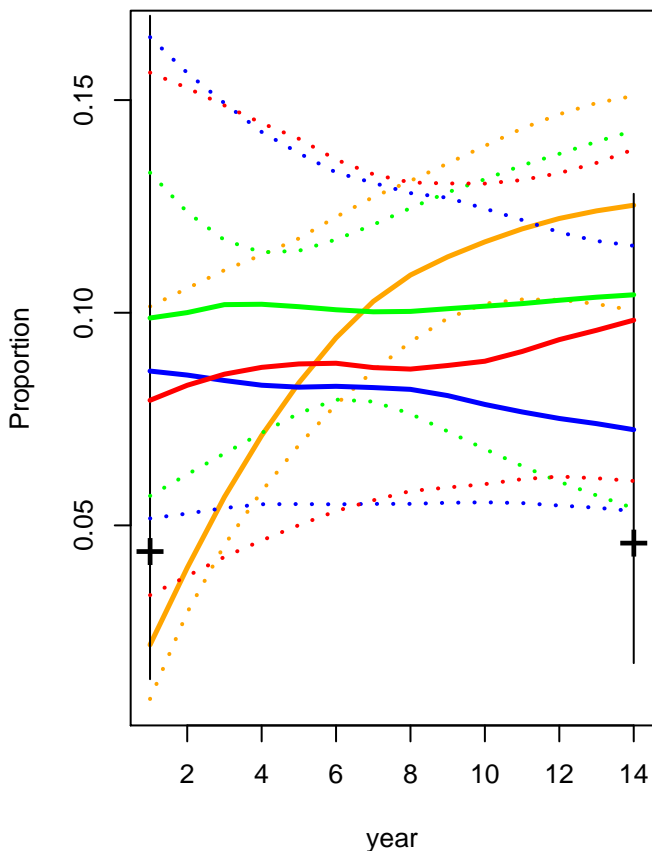

Moderate Infection

Dead

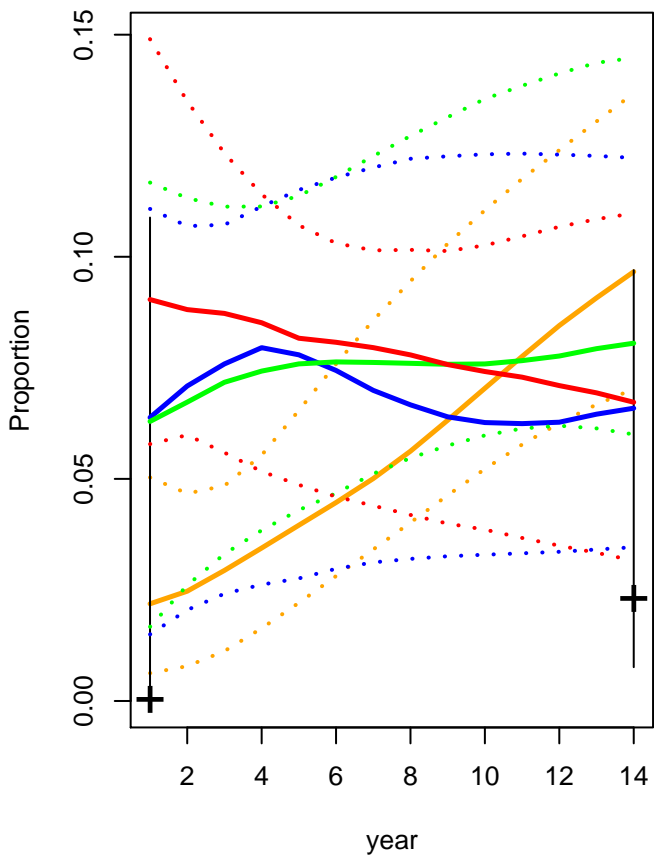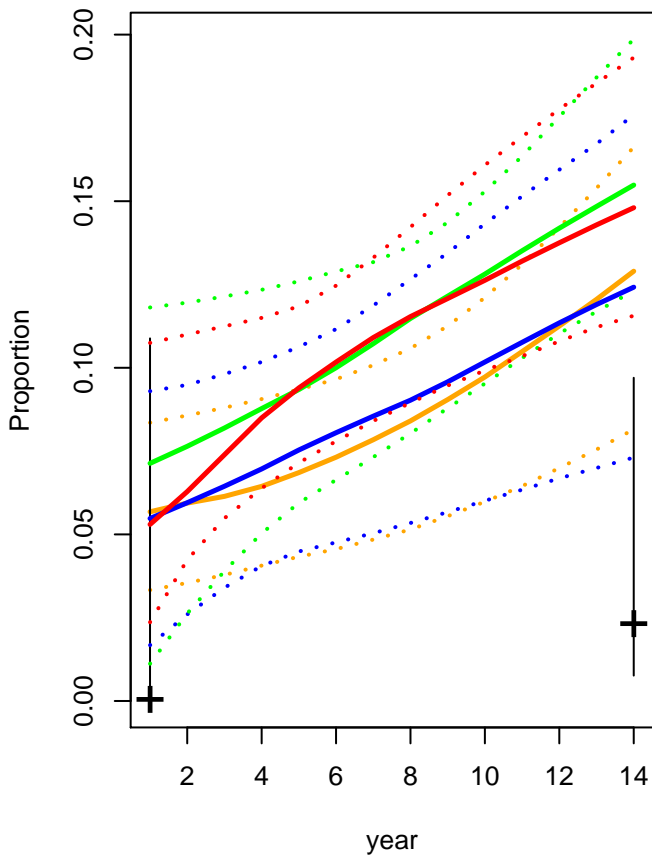

Uninfected

Site 96

Slight Infection

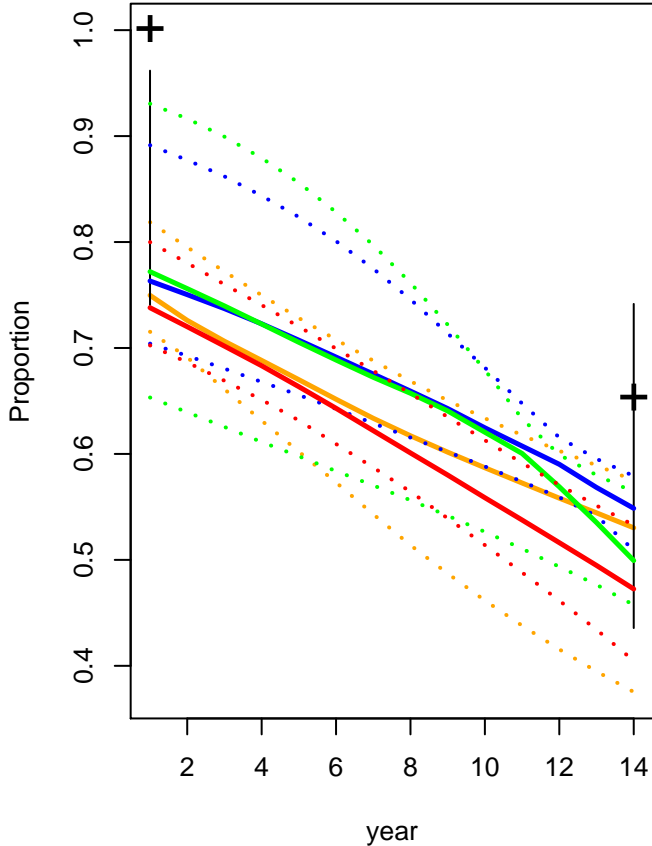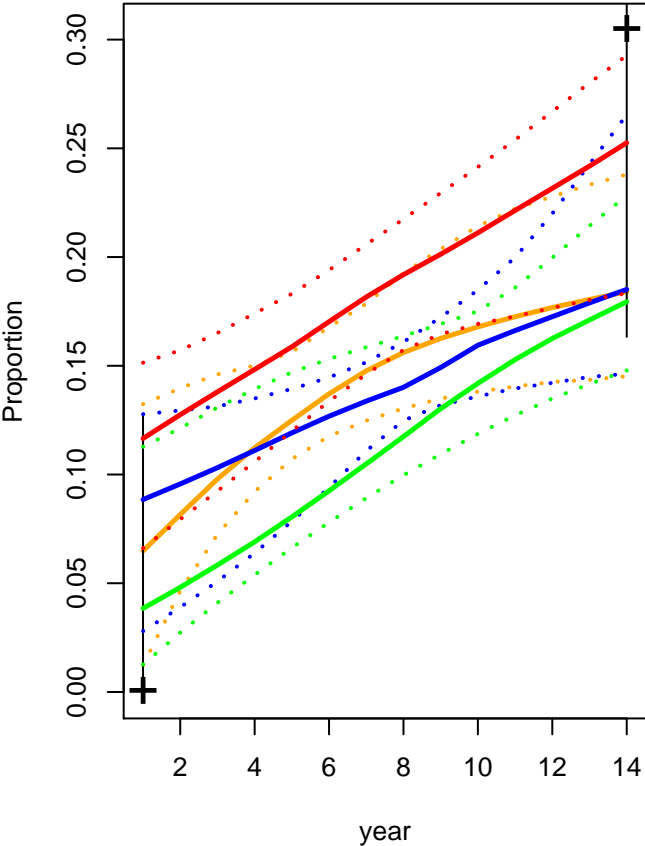

Moderate Infection

Dead

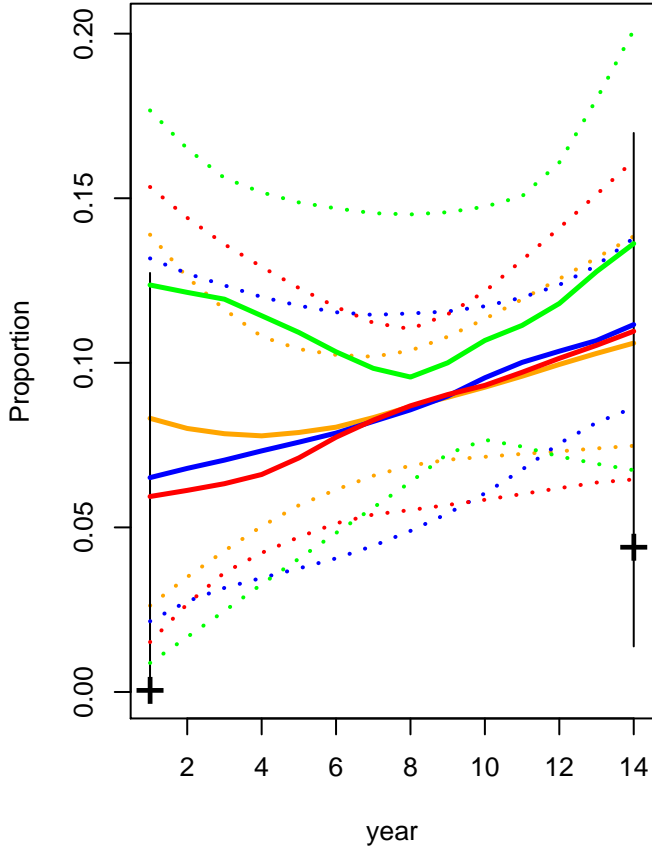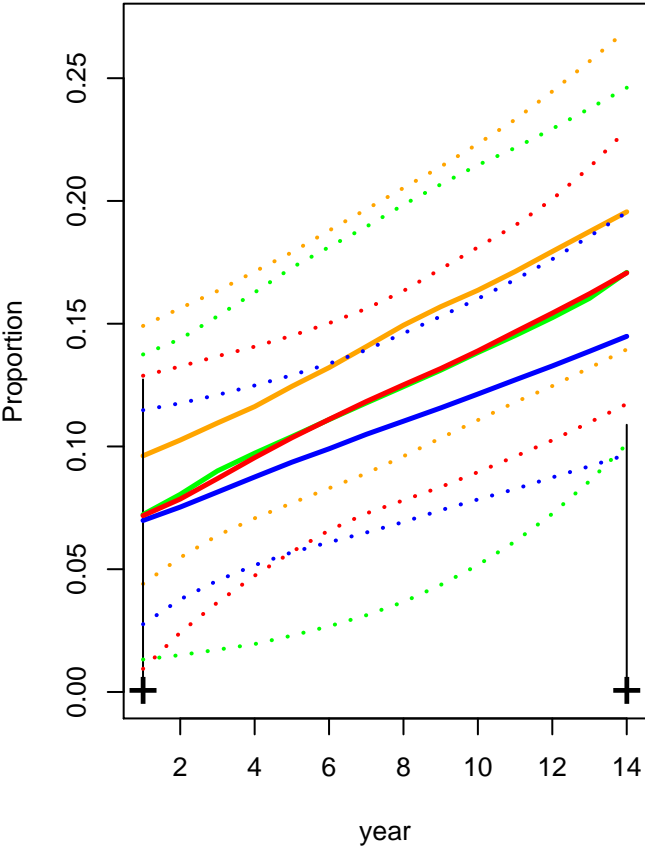

Uninfected

Site 97

Slight Infection

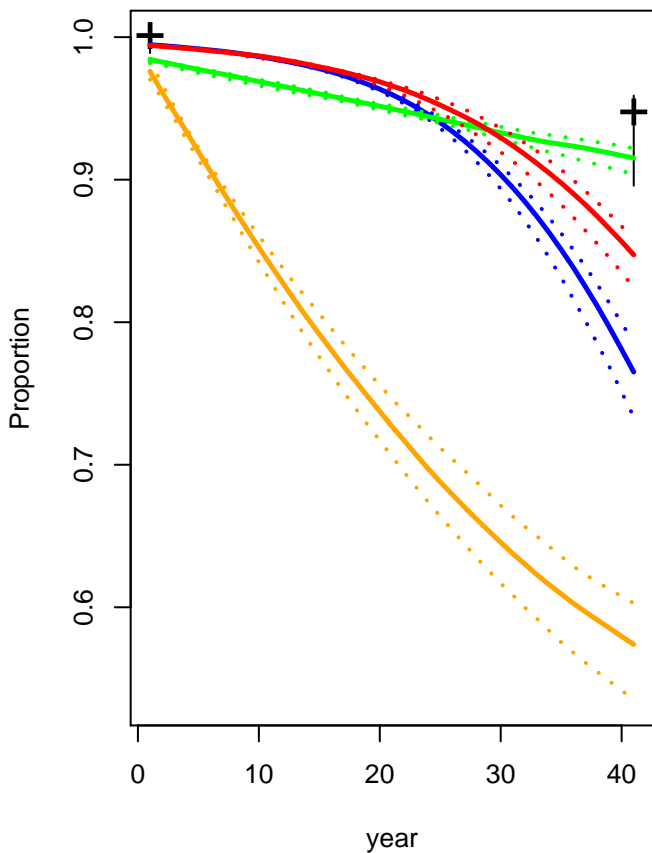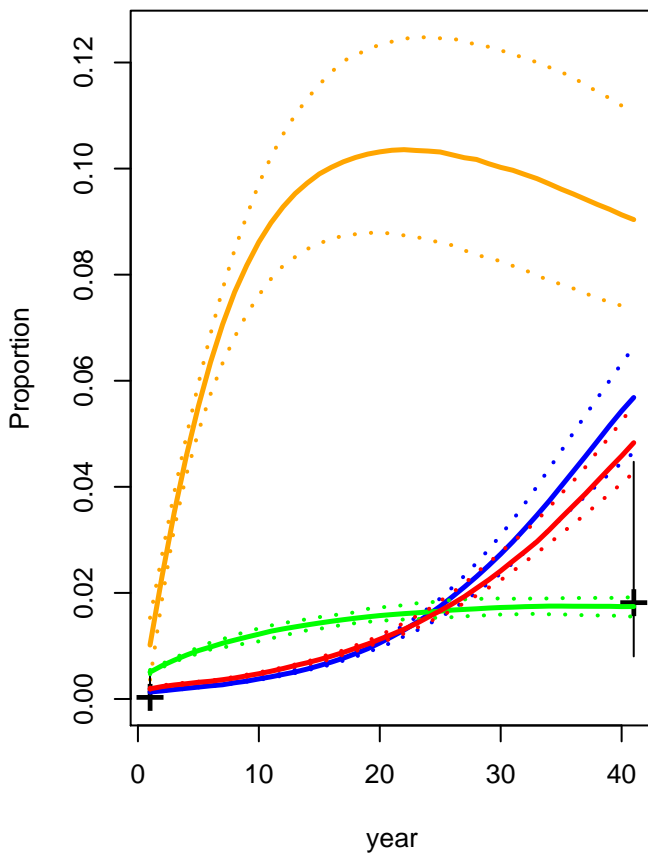

Moderate Infection

Dead

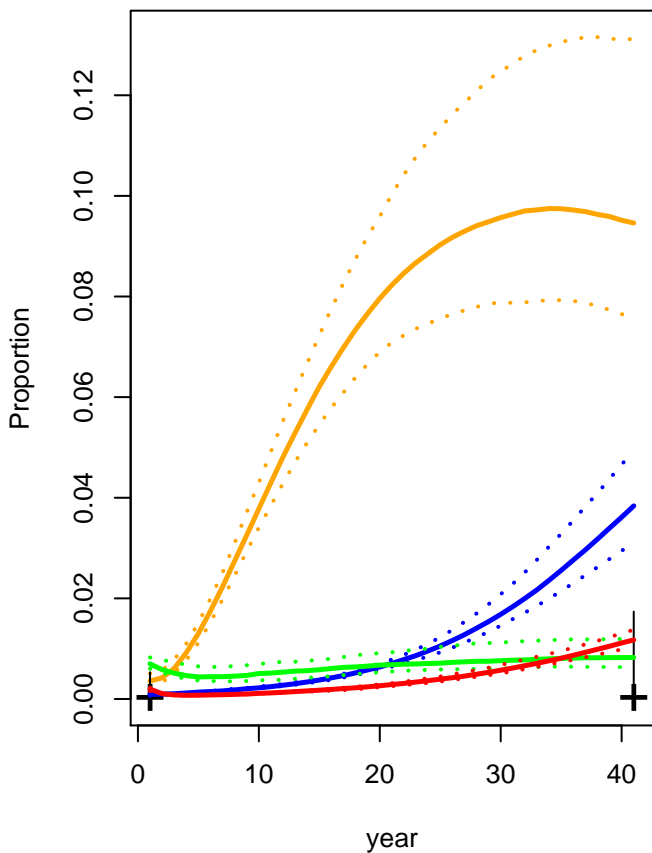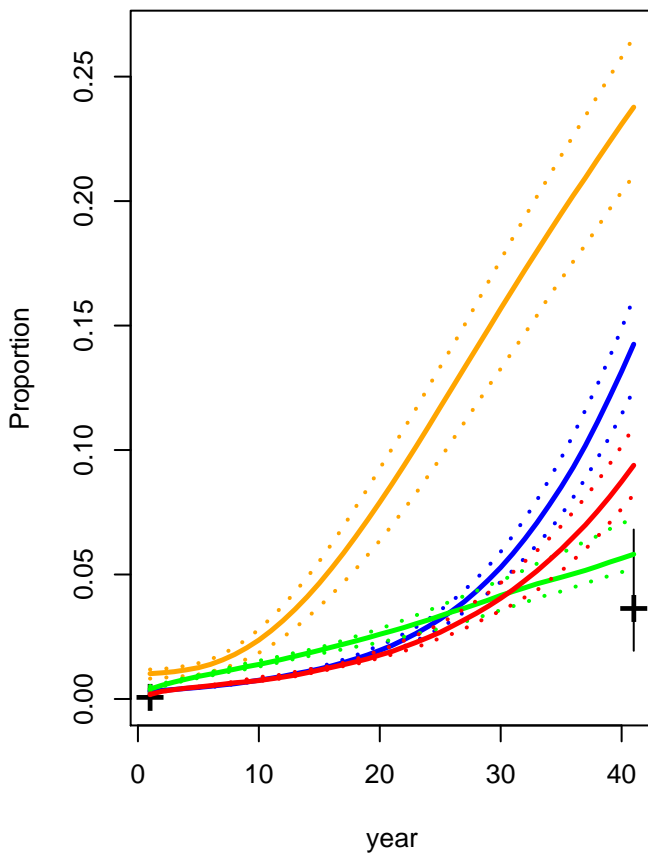

Uninfected

Site 98

Slight Infection

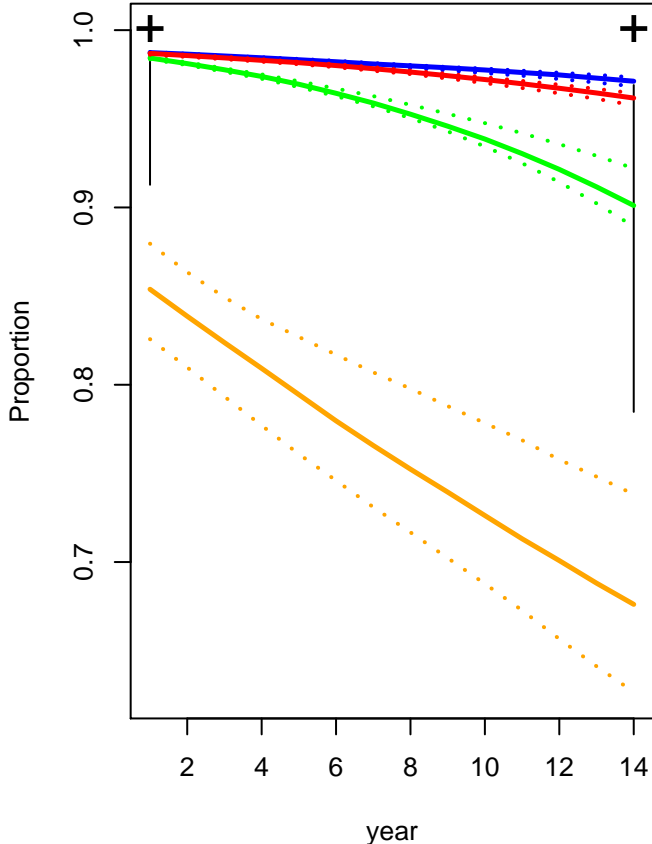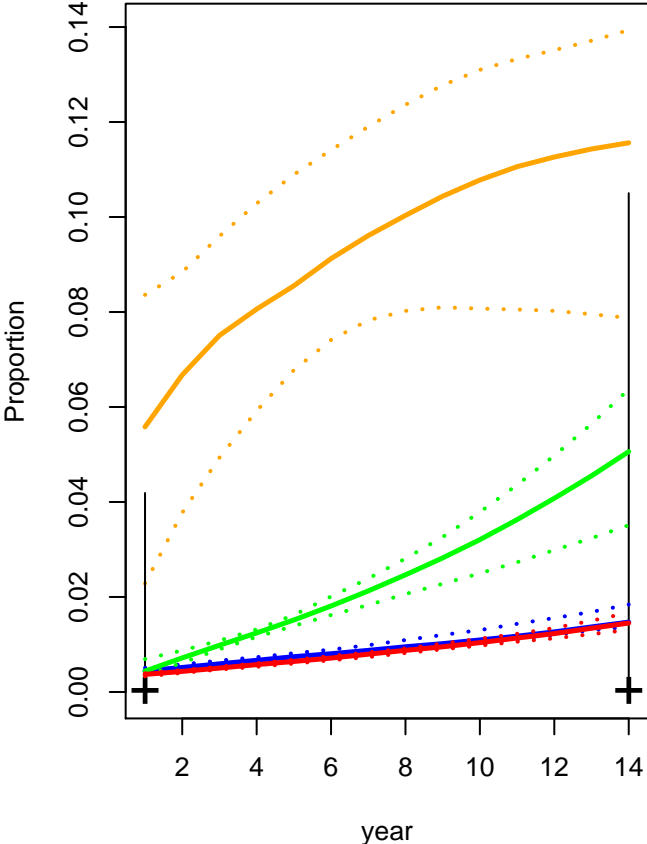

Moderate Infection

Dead

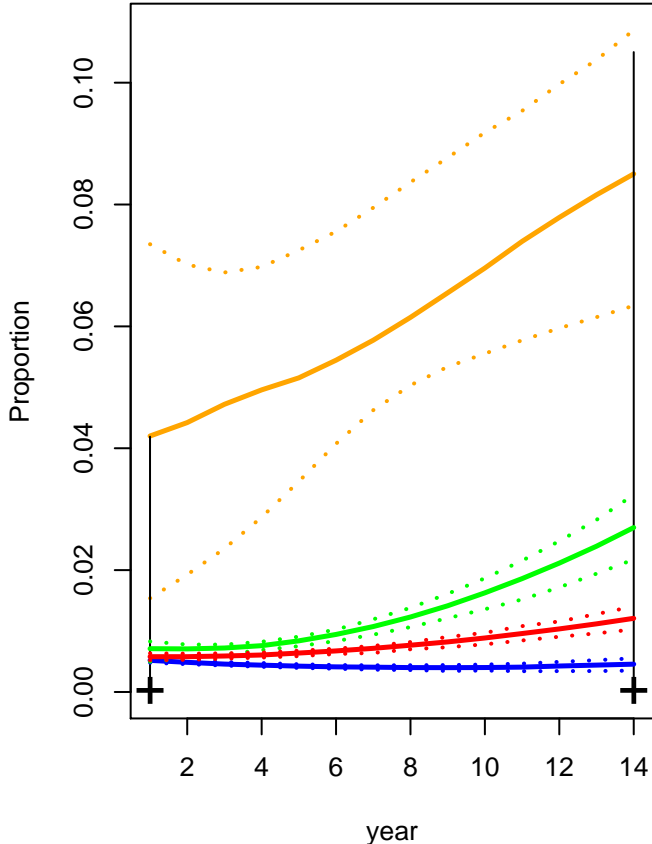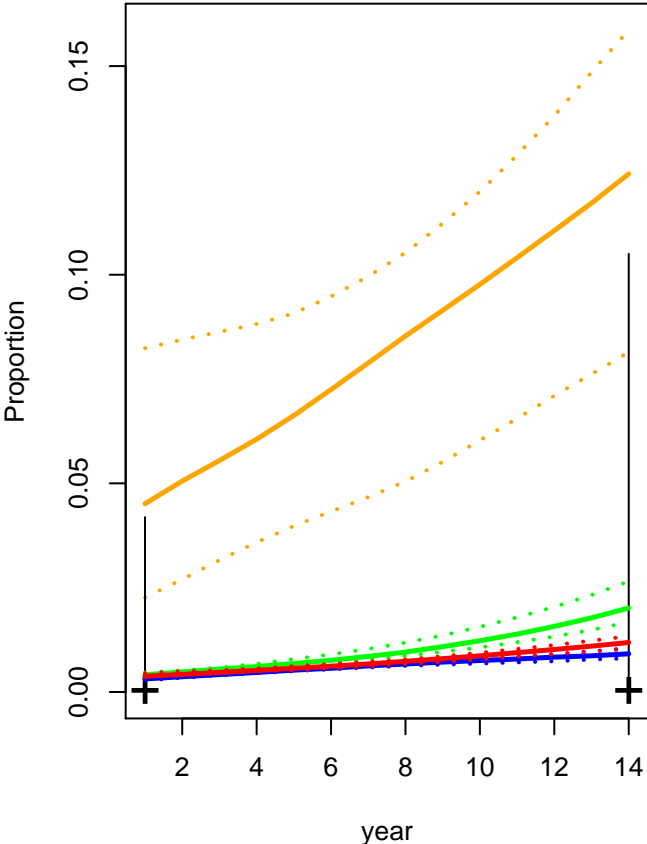

Uninfected

Site 99

Slight Infection

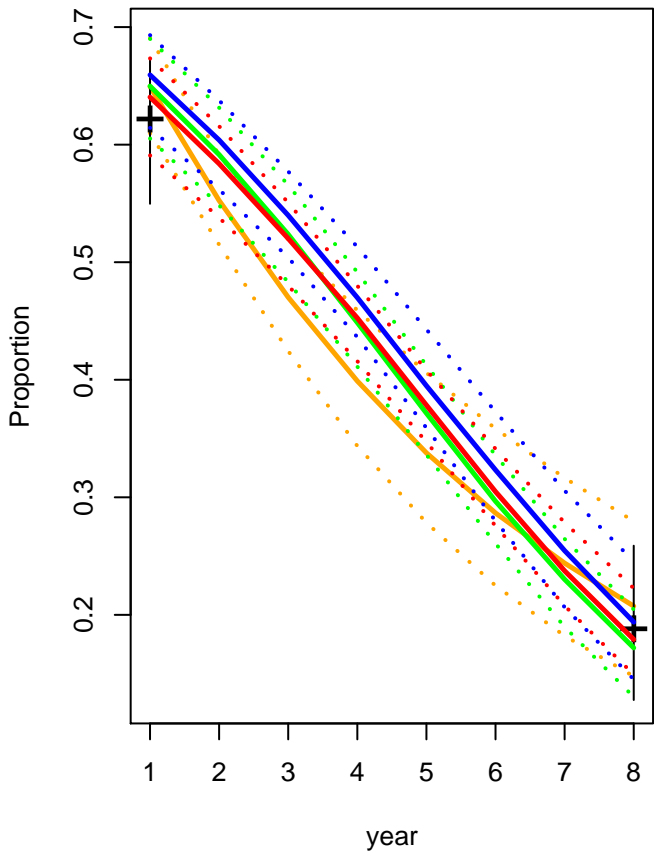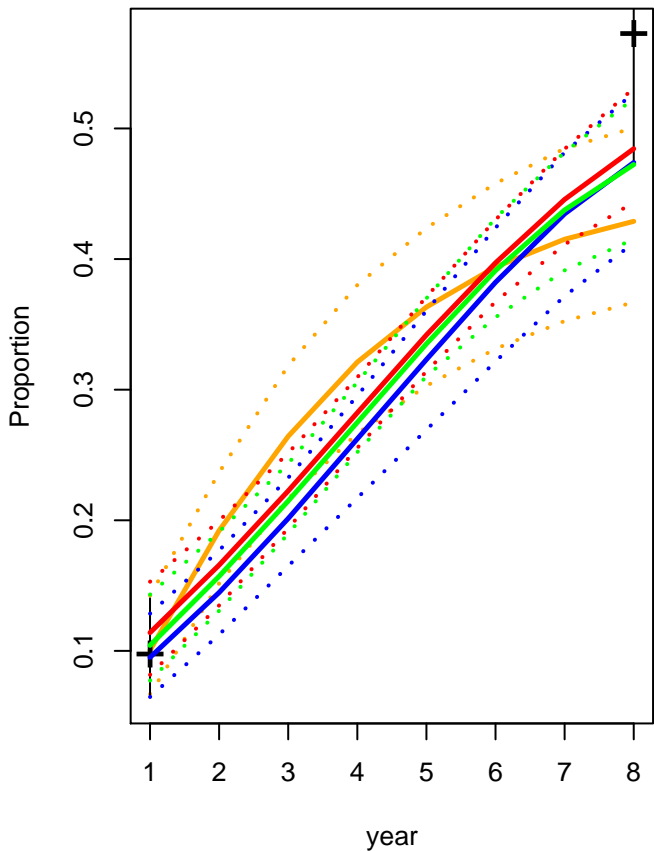

Moderate Infection

Dead

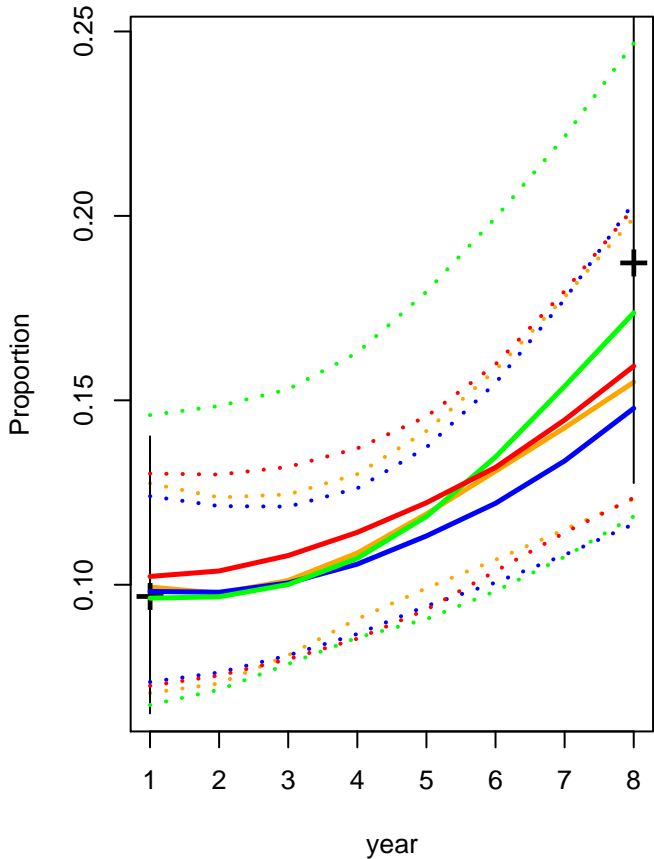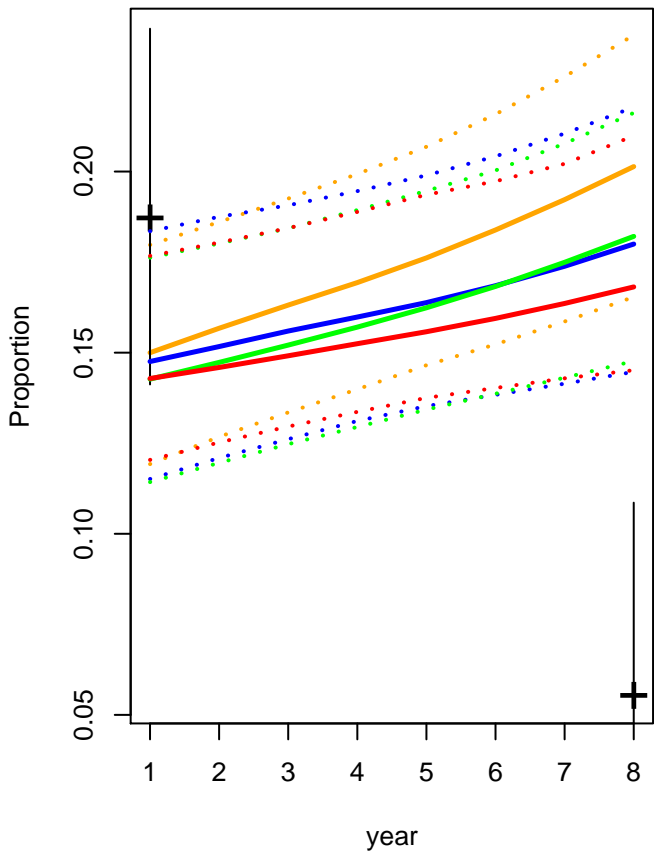

Uninfected

Site 100

Slight Infection

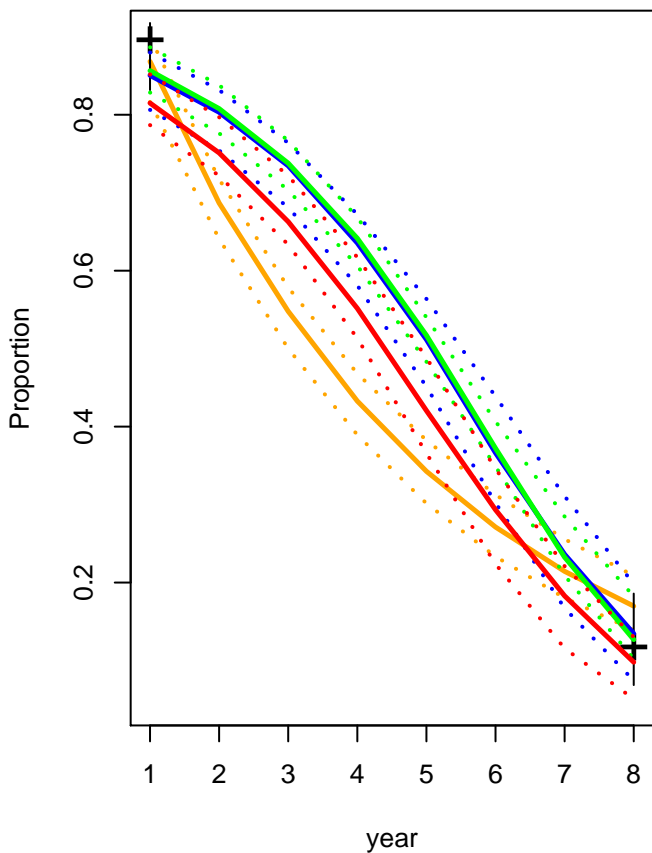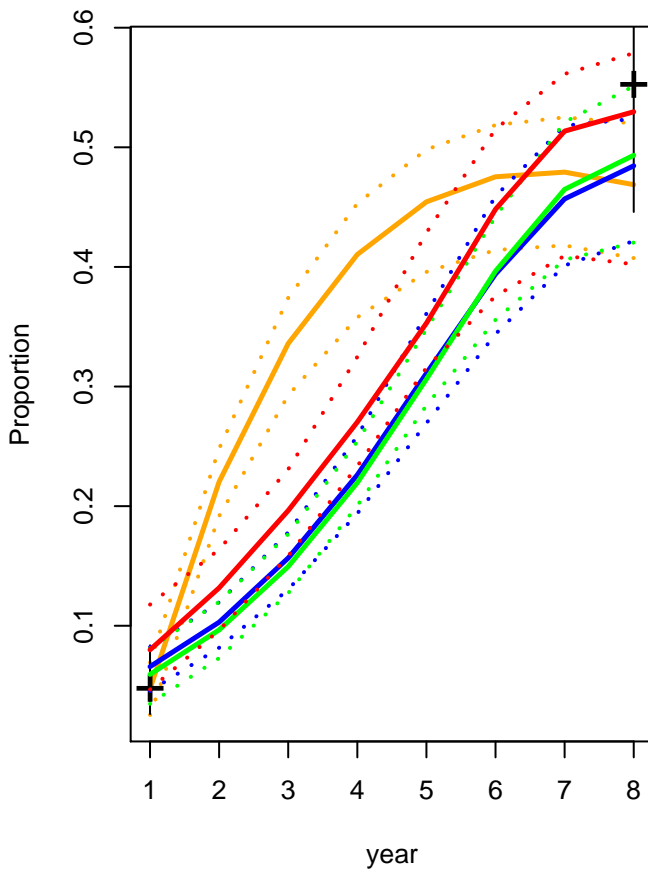

Moderate Infection

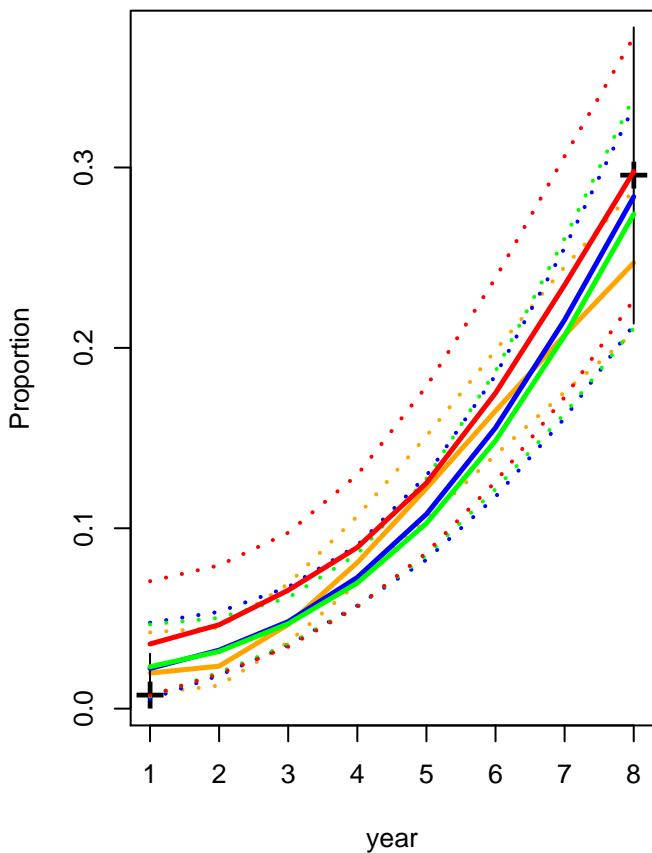

Dead

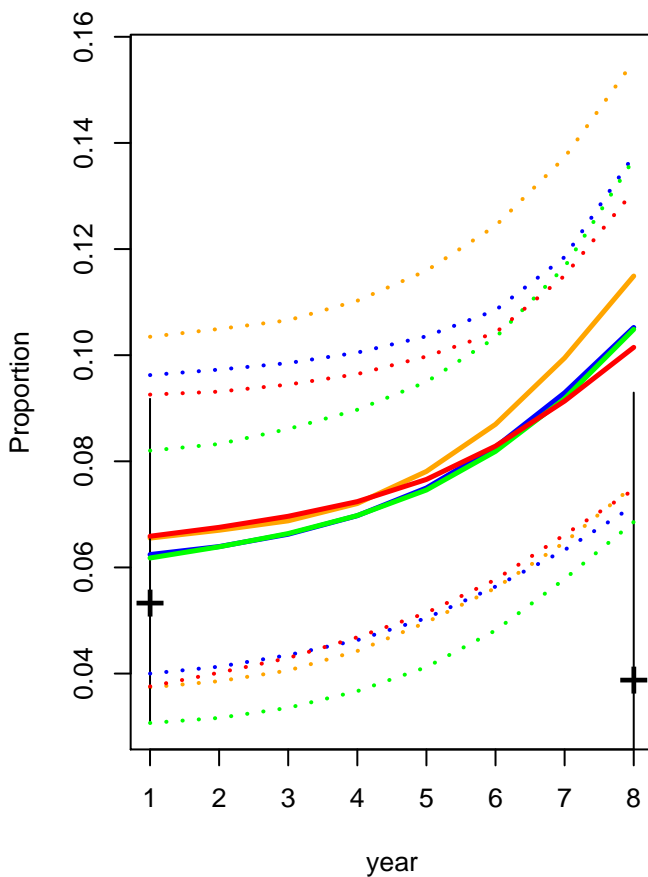

Uninfected

Site 101

Slight Infection

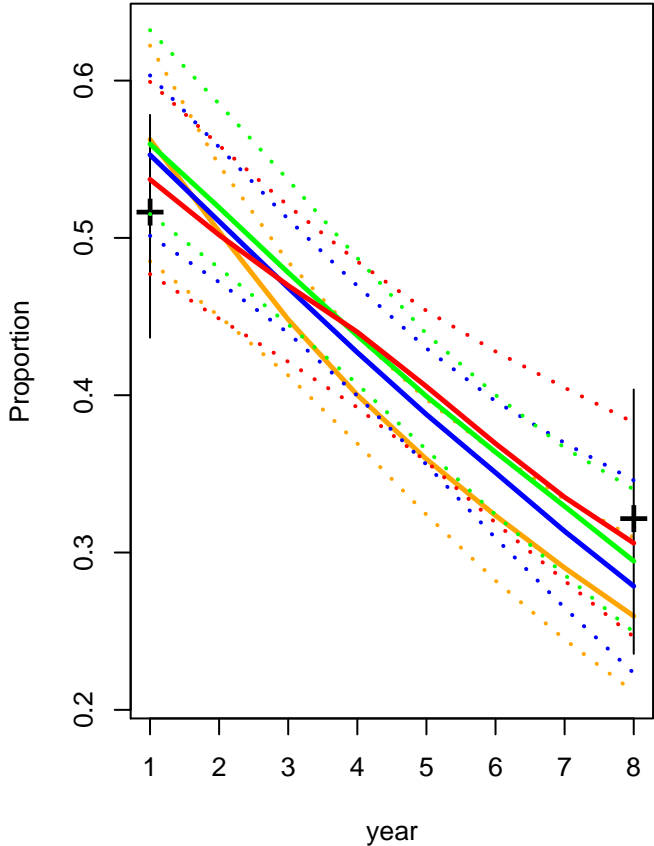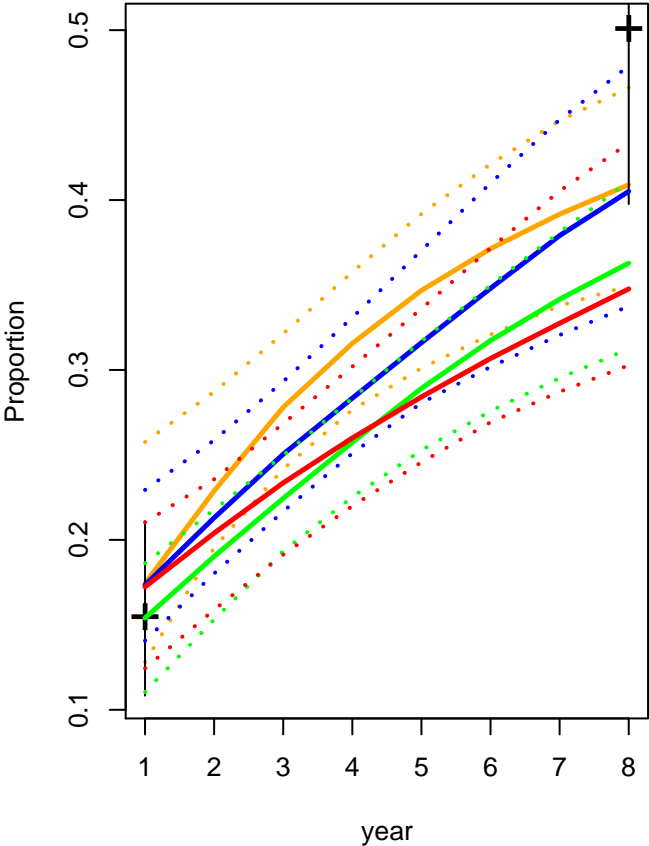

Moderate Infection

Dead

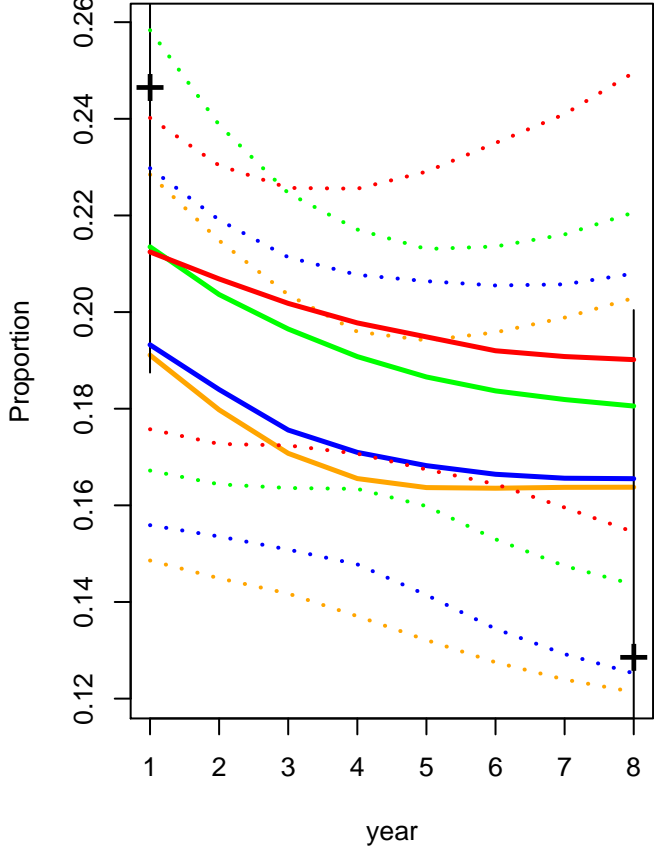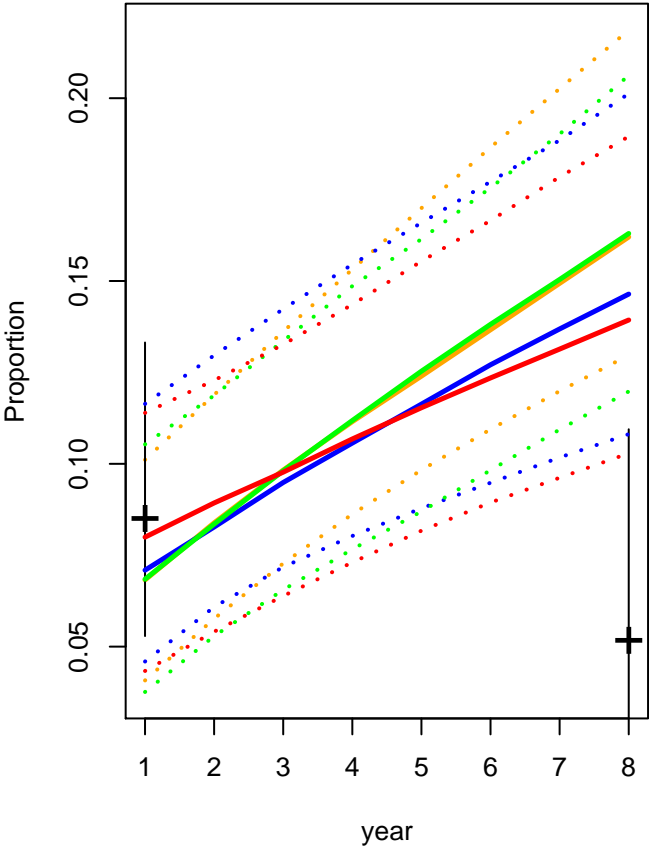

Uninfected

Site 102

Slight Infection

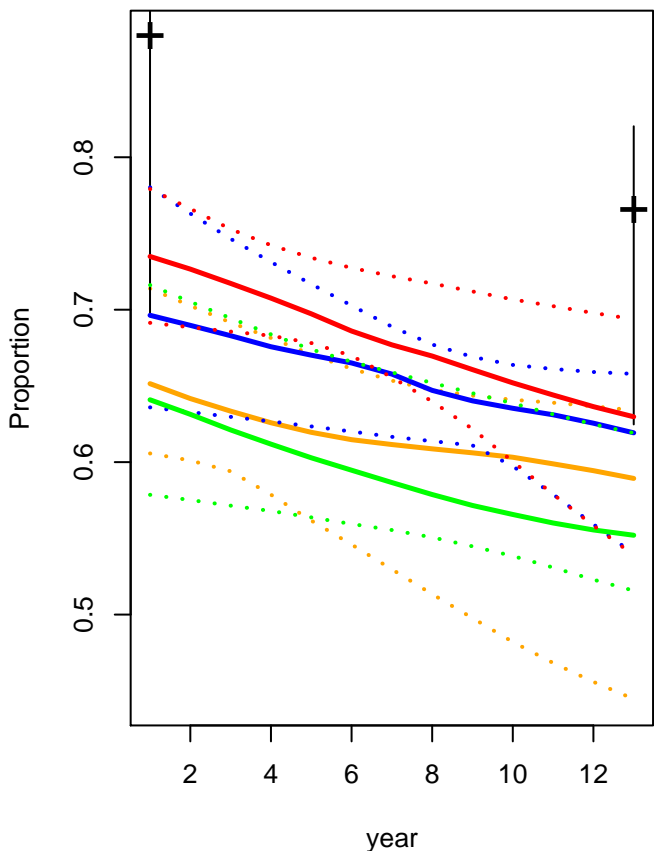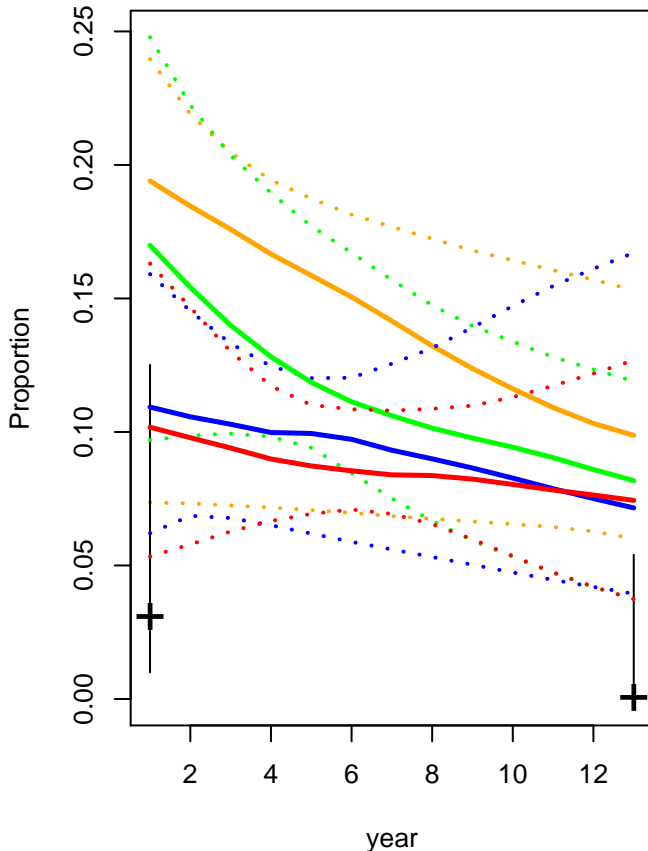

Moderate Infection

Dead

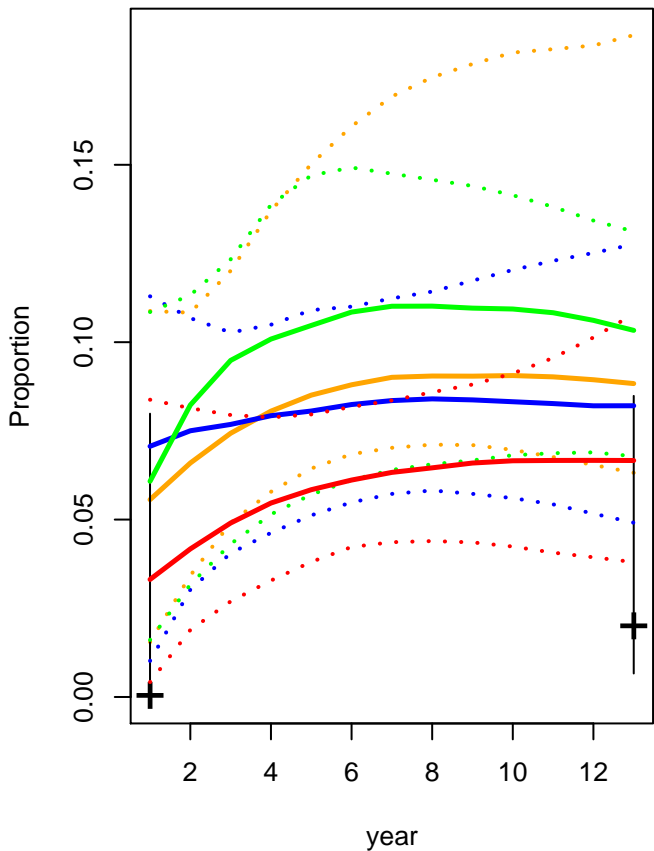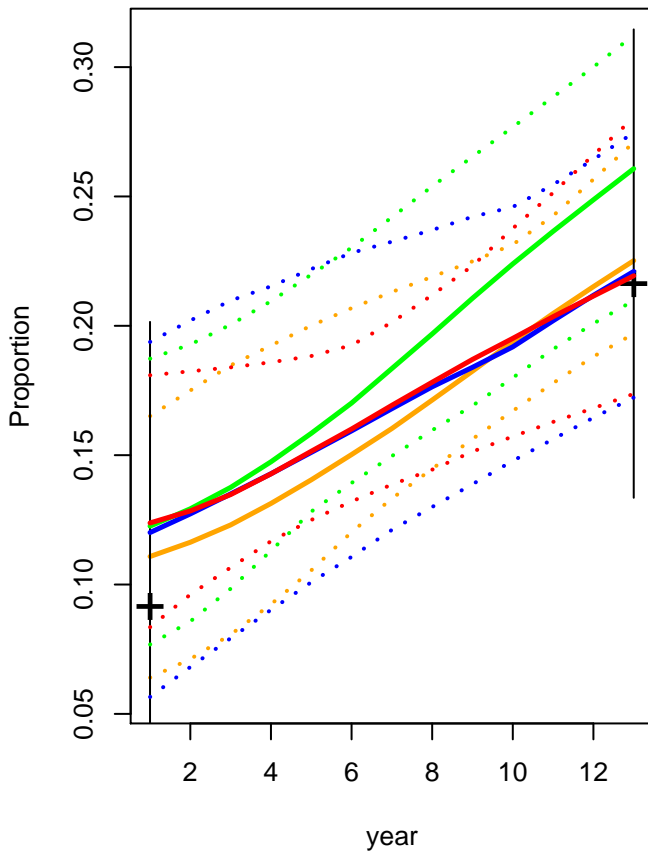



Uninfected

Site 103

Slight Infection

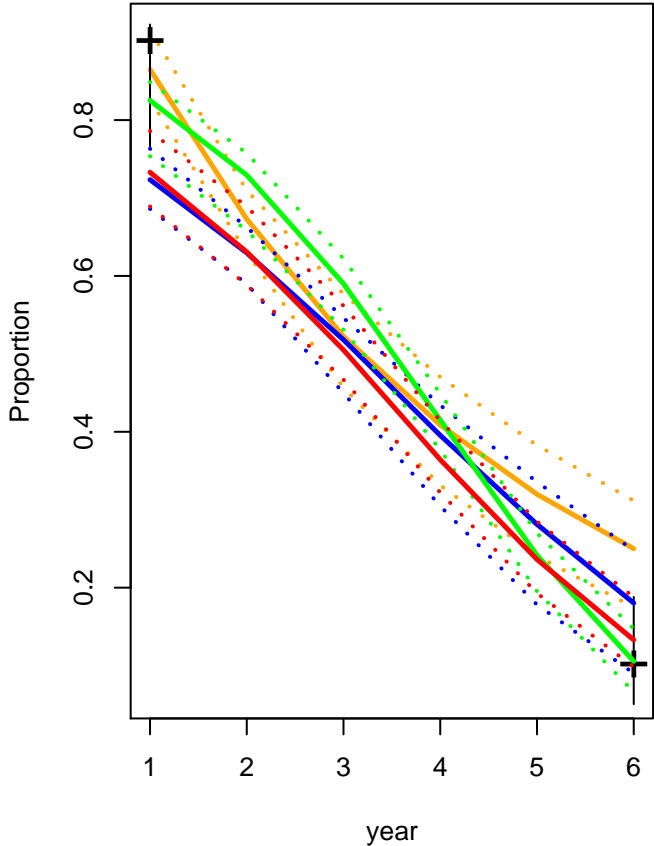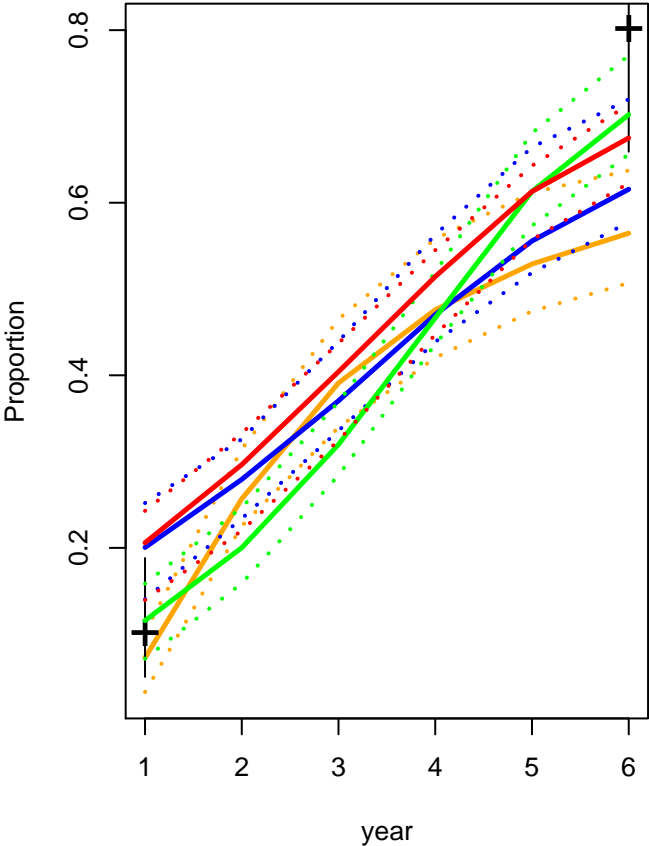

Moderate Infection

Dead

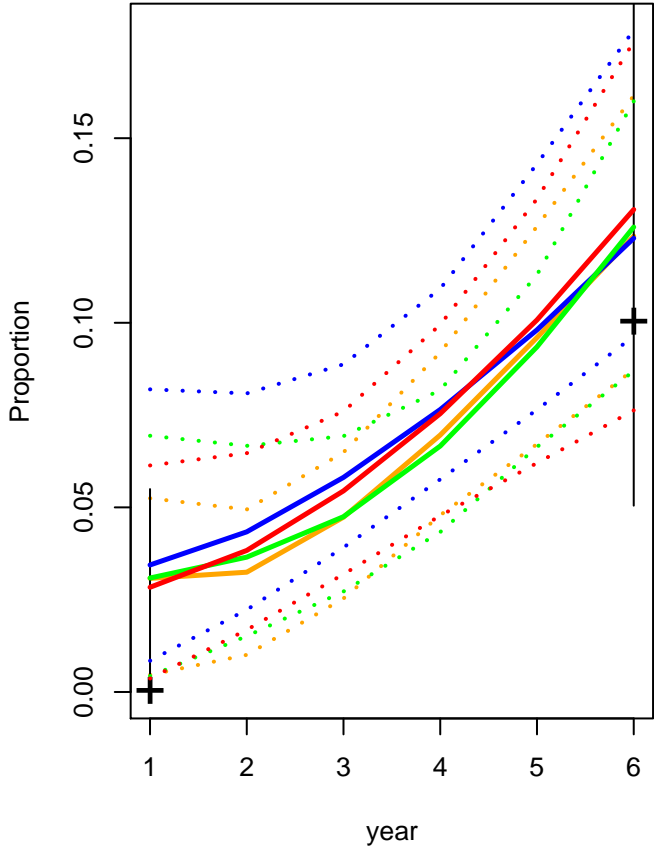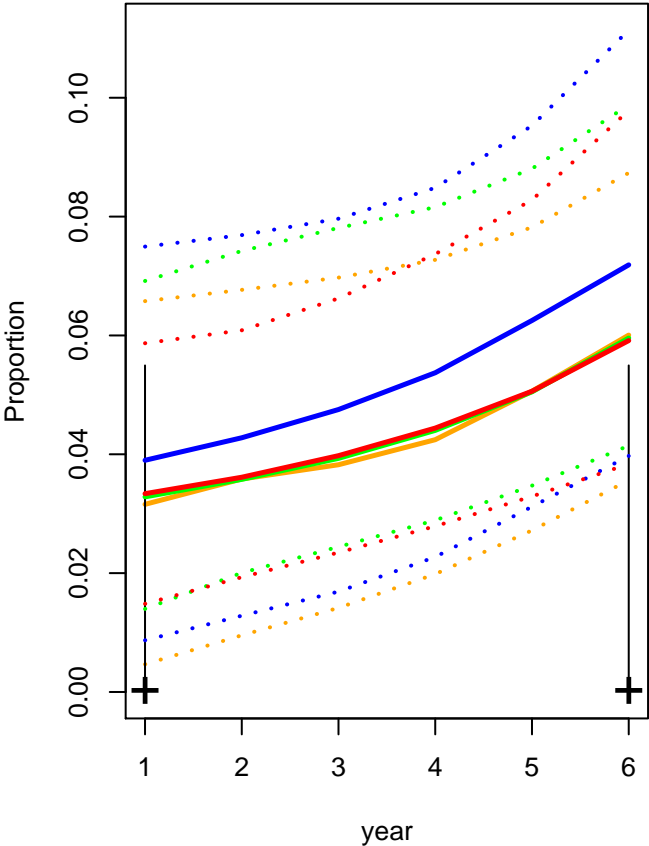

Uninfected

Site 104

Slight Infection

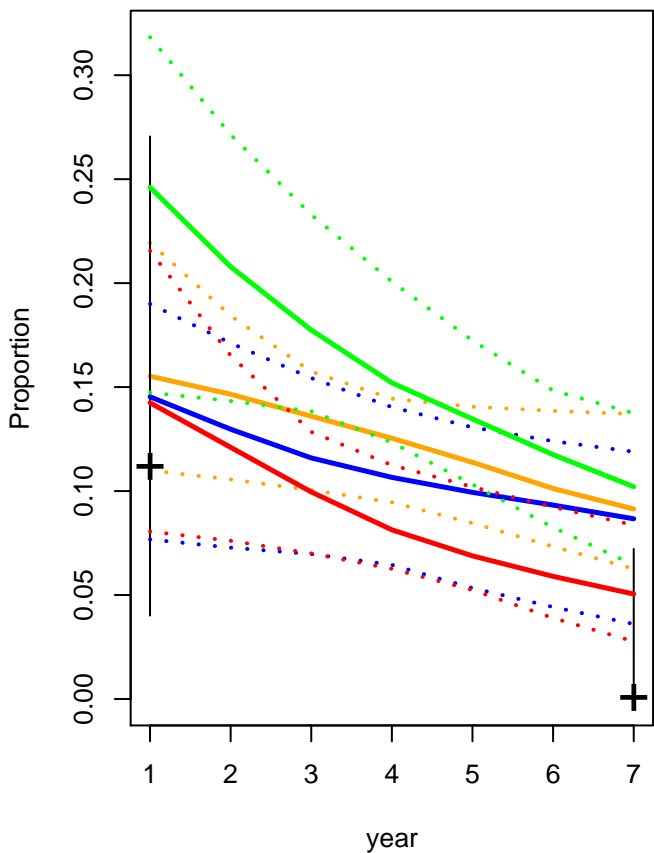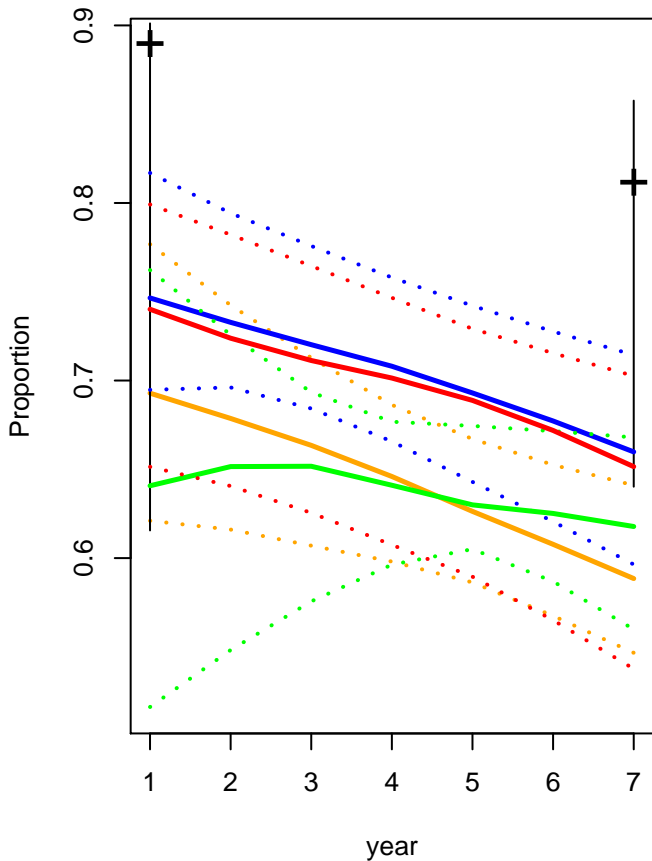

Moderate Infection

Dead

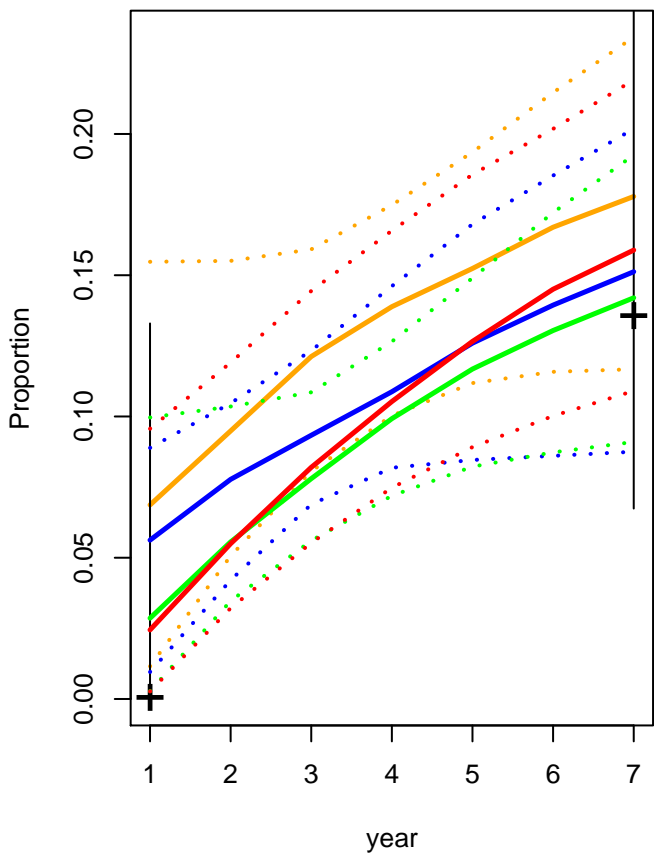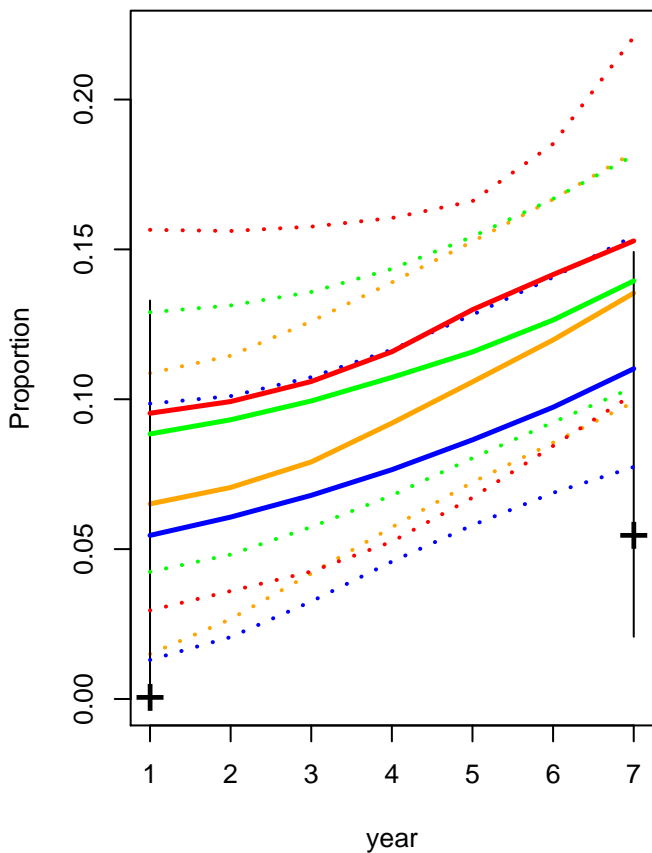

Uninfected

Site 105

Slight Infection

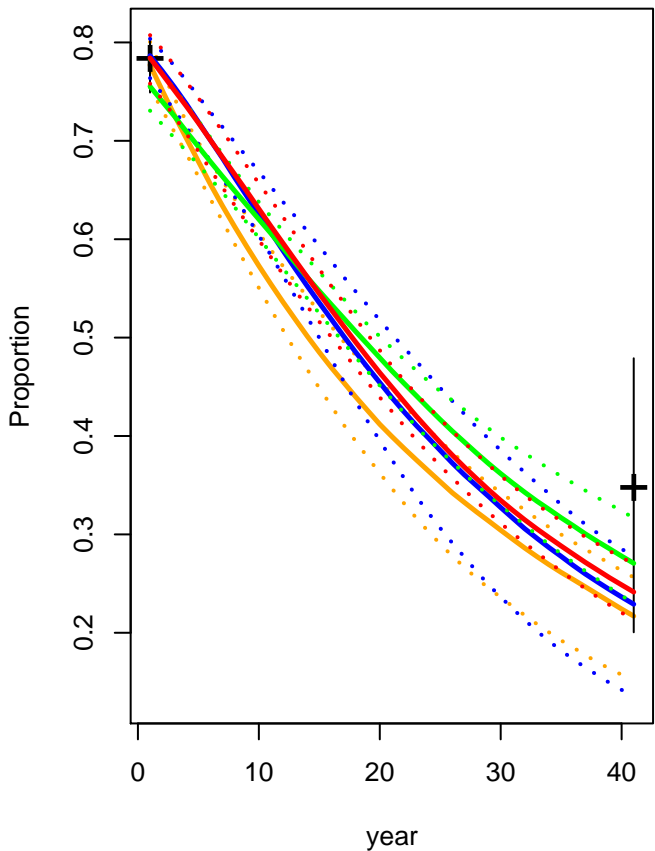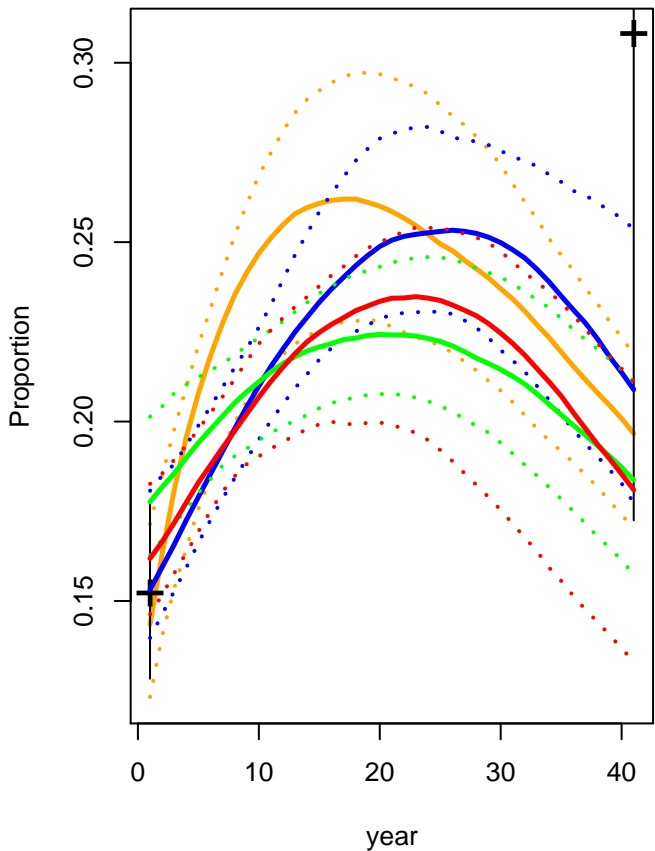

Moderate Infection

Dead

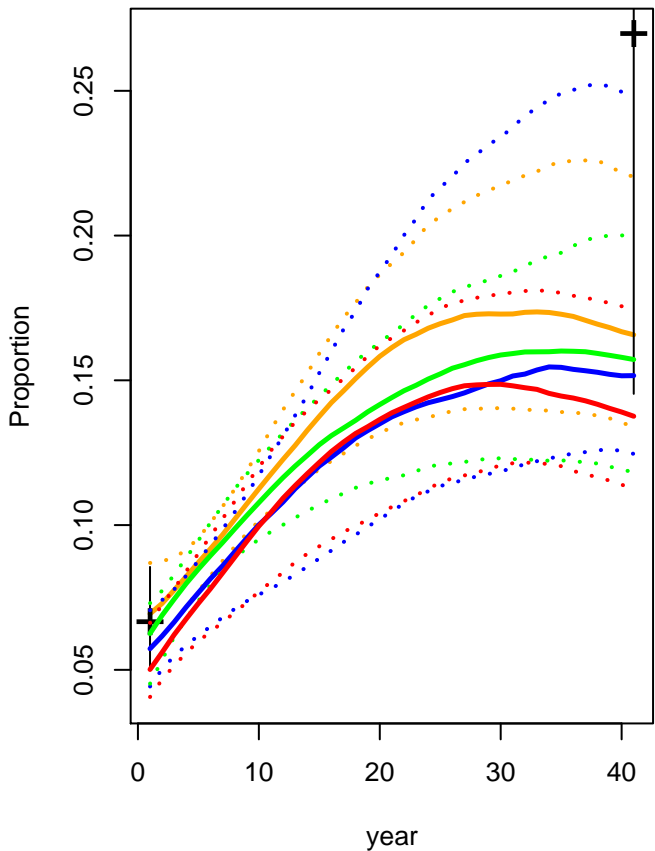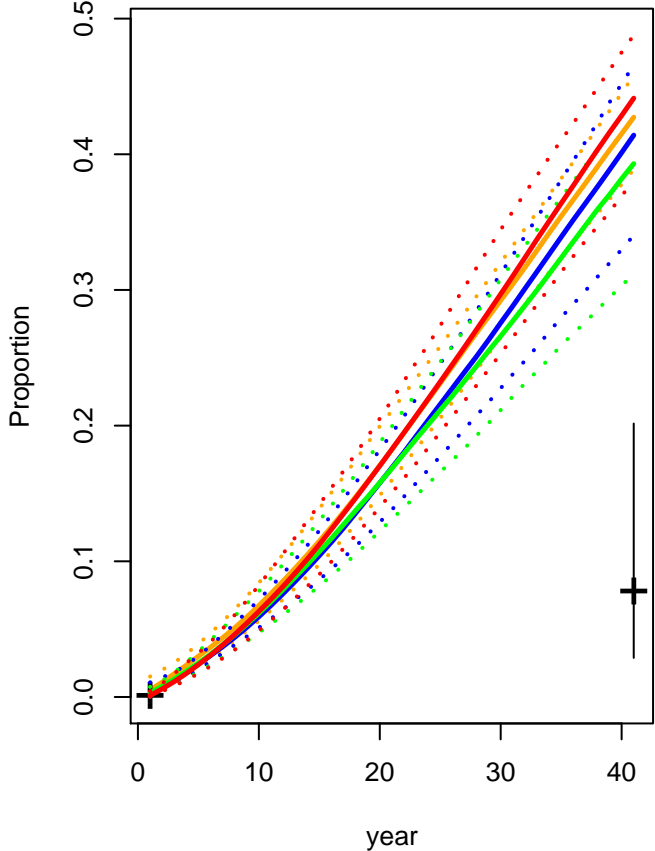

Uninfected

Site 106

Slight Infection

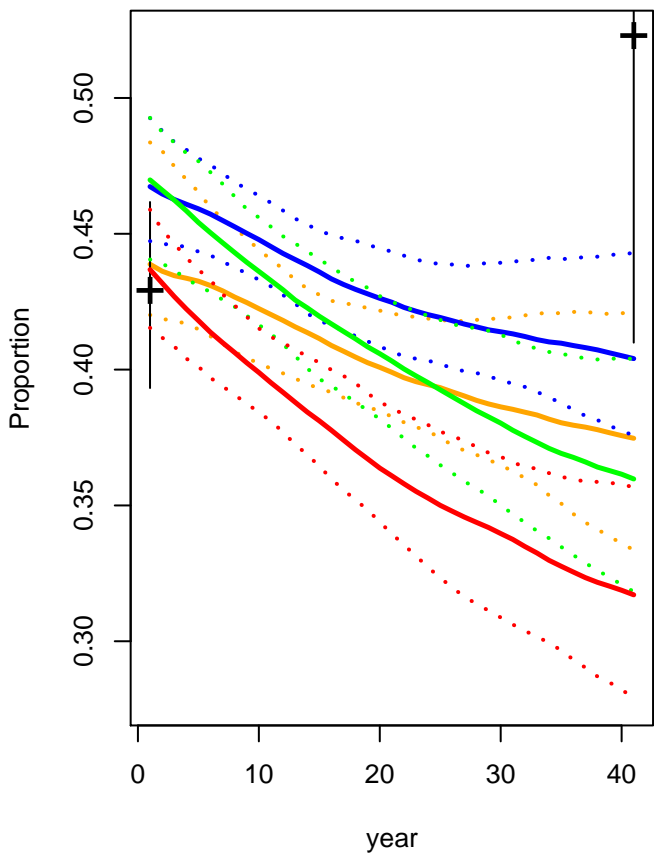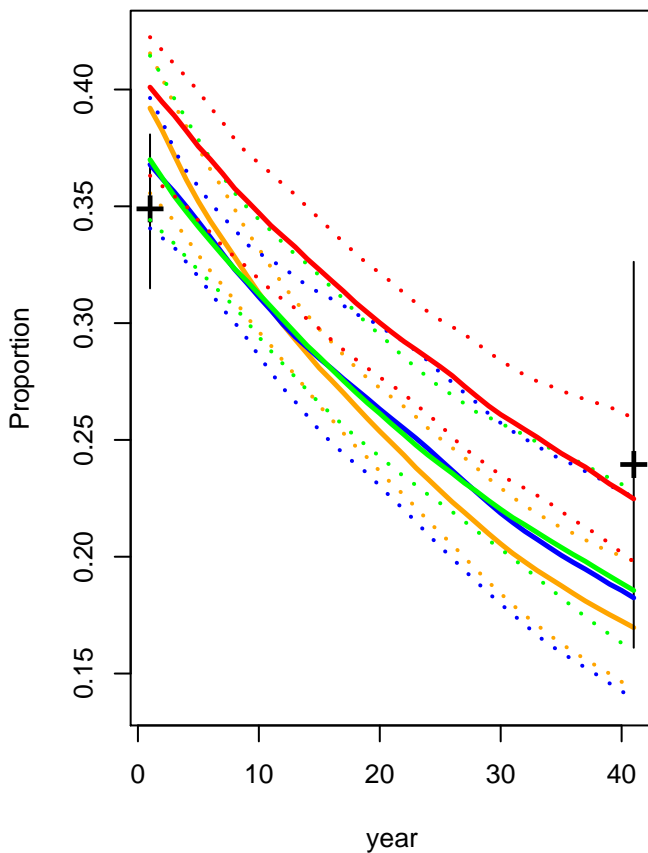

Moderate Infection

Dead

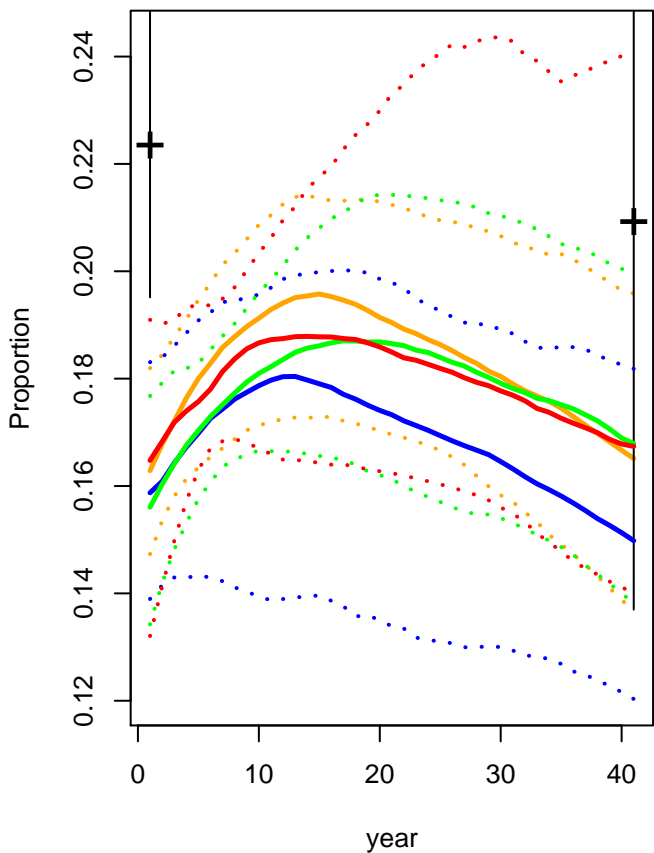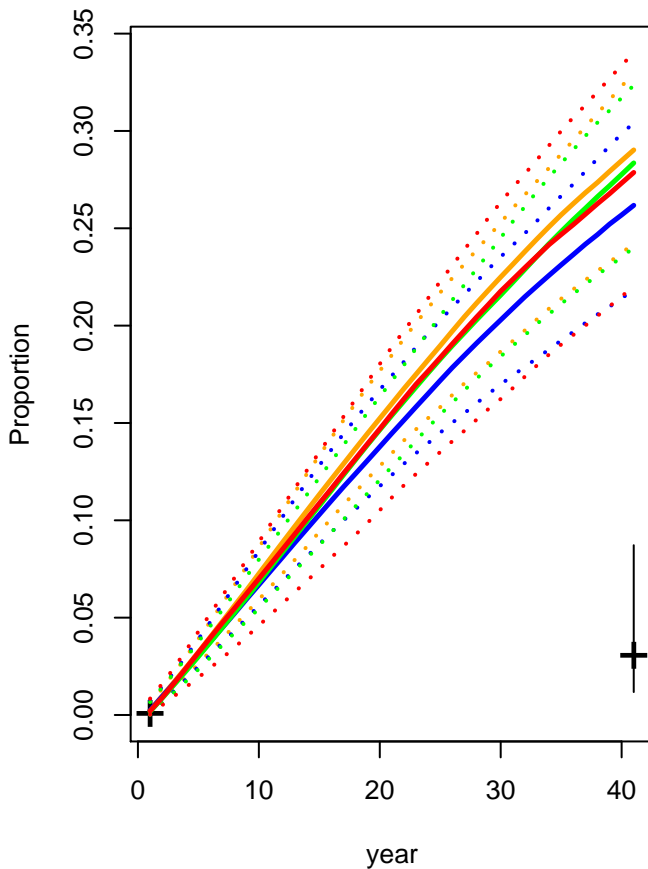

Uninfected

Site 107

Slight Infection

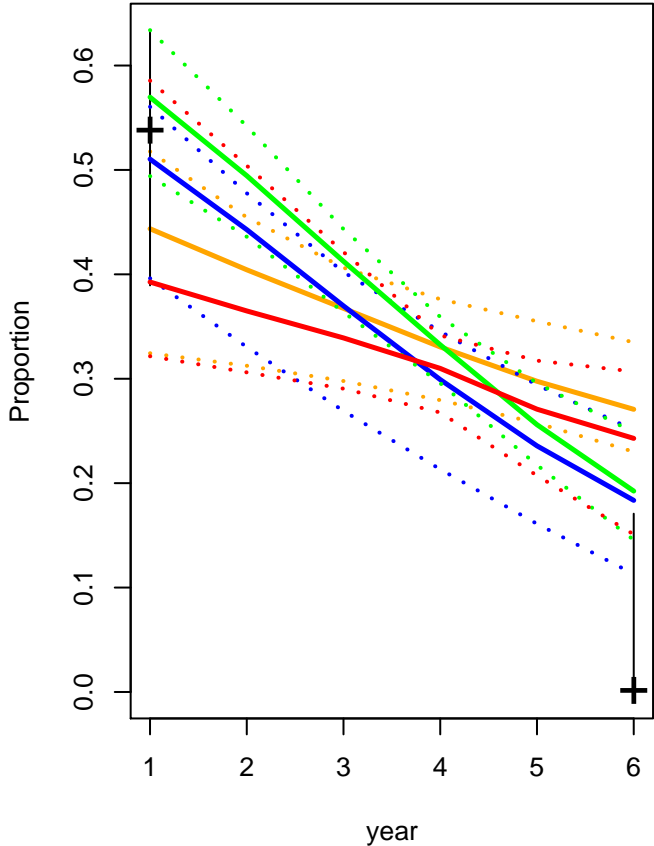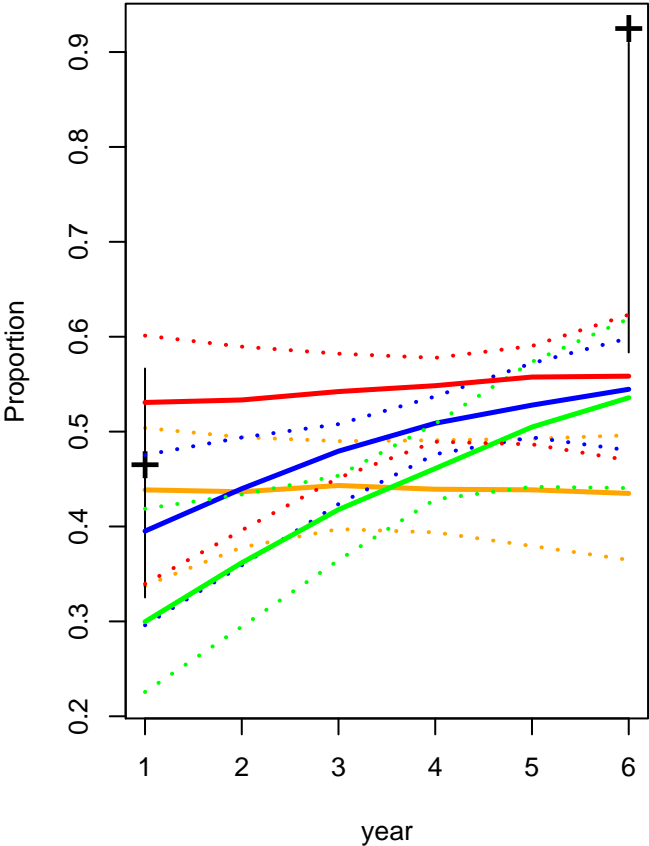

Moderate Infection

Dead

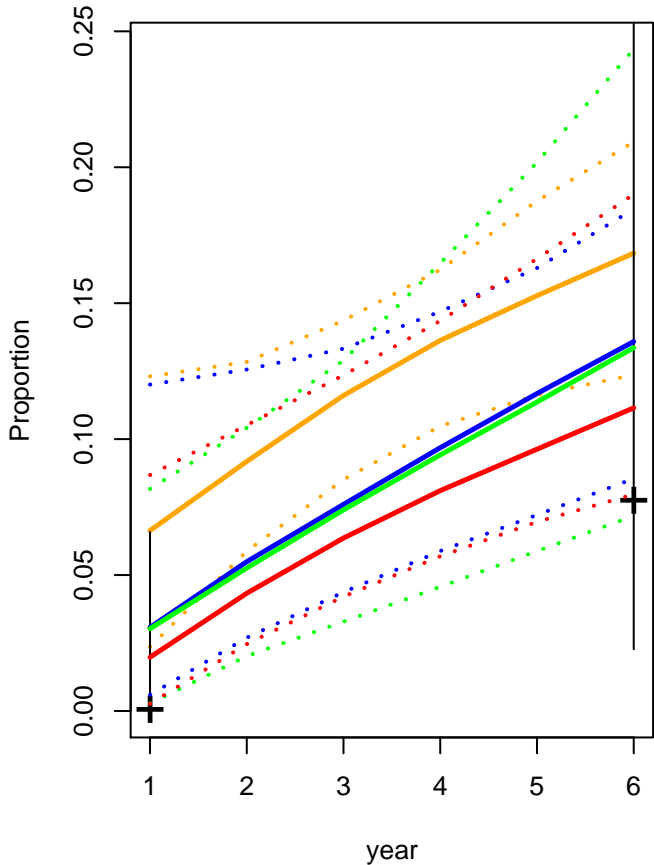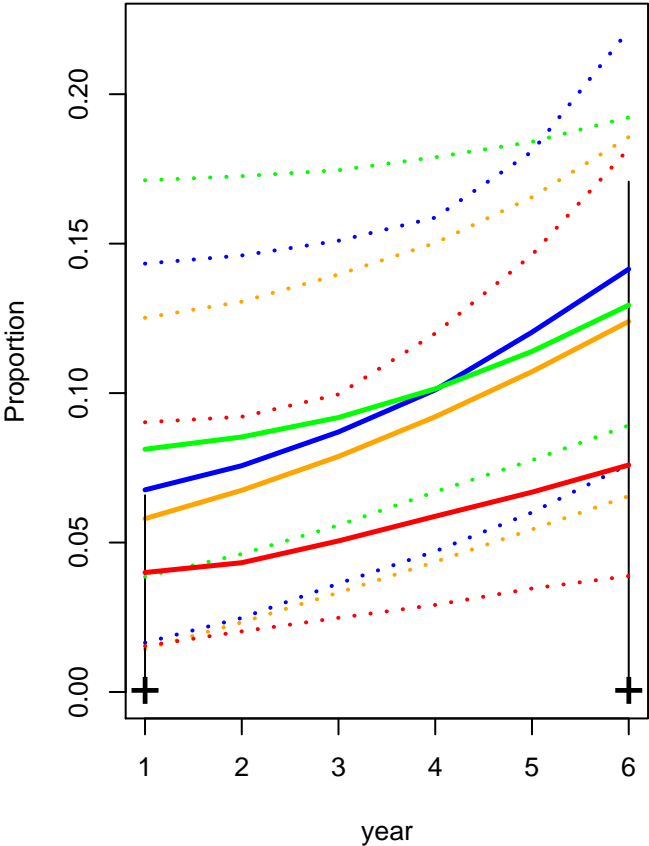

Uninfected

Site 108

Slight Infection

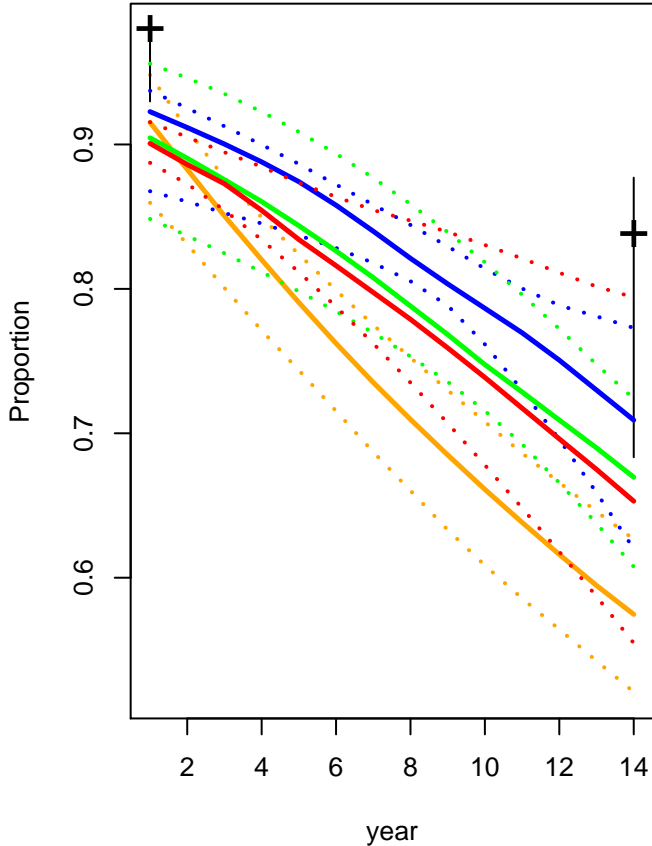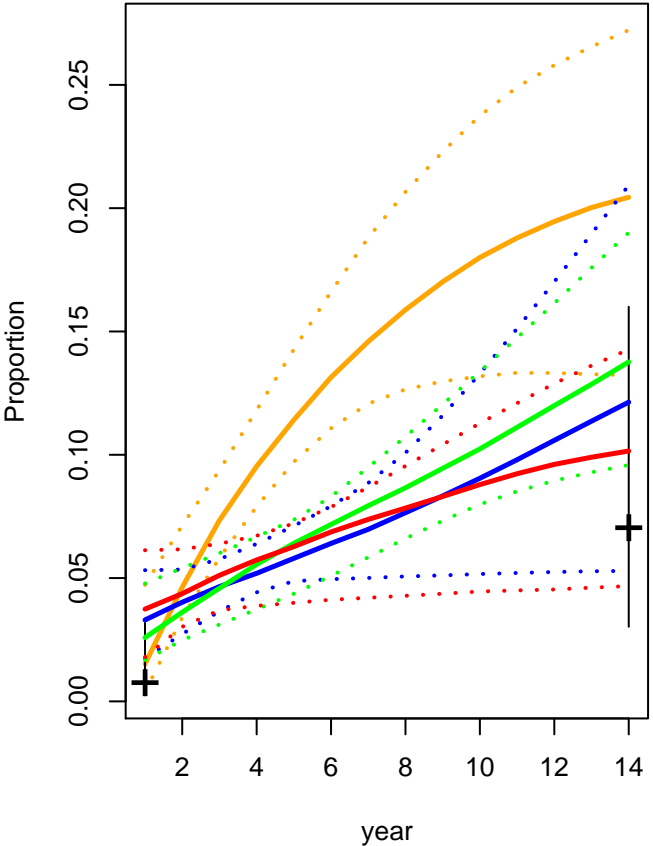

Moderate Infection

Dead

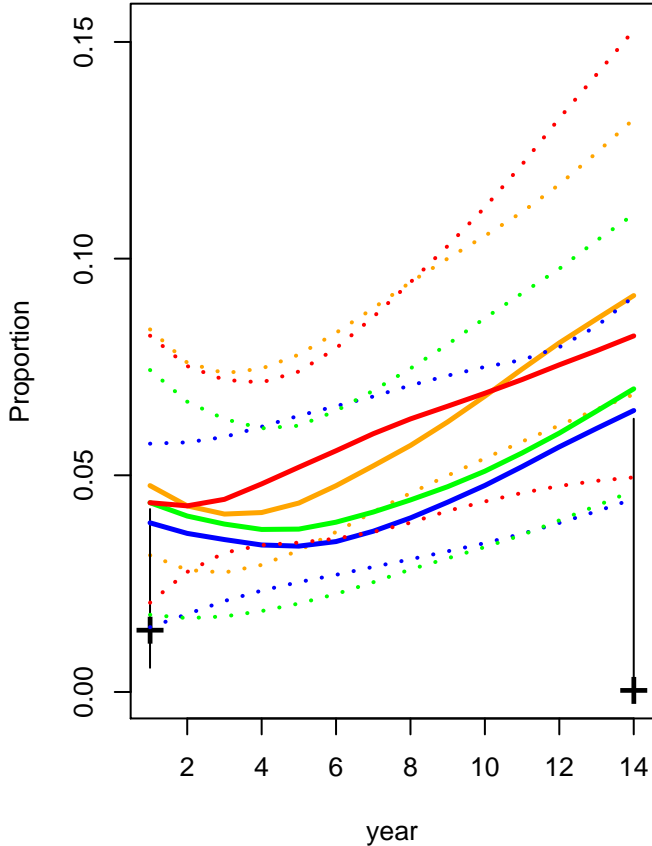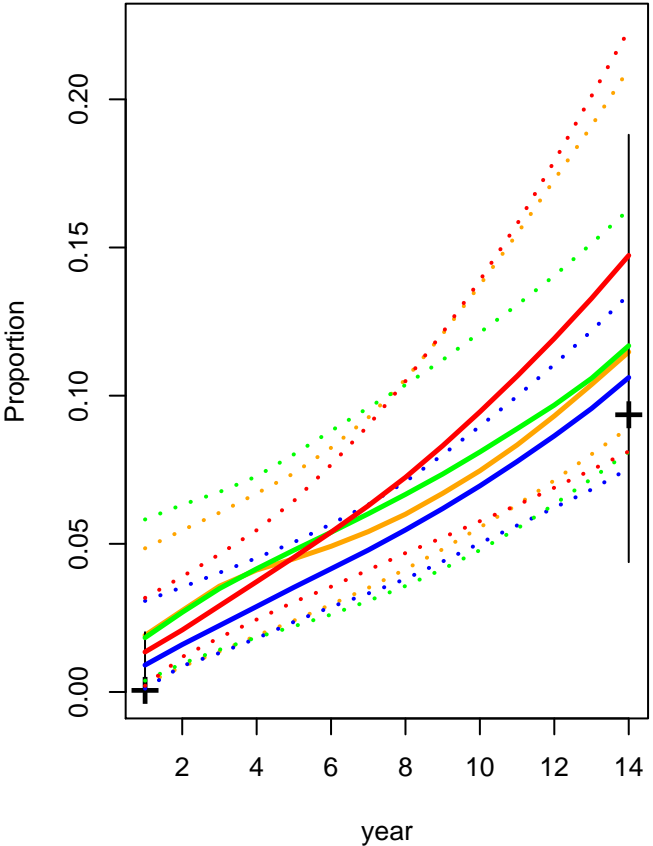

Uninfected

Site 109

Slight Infection

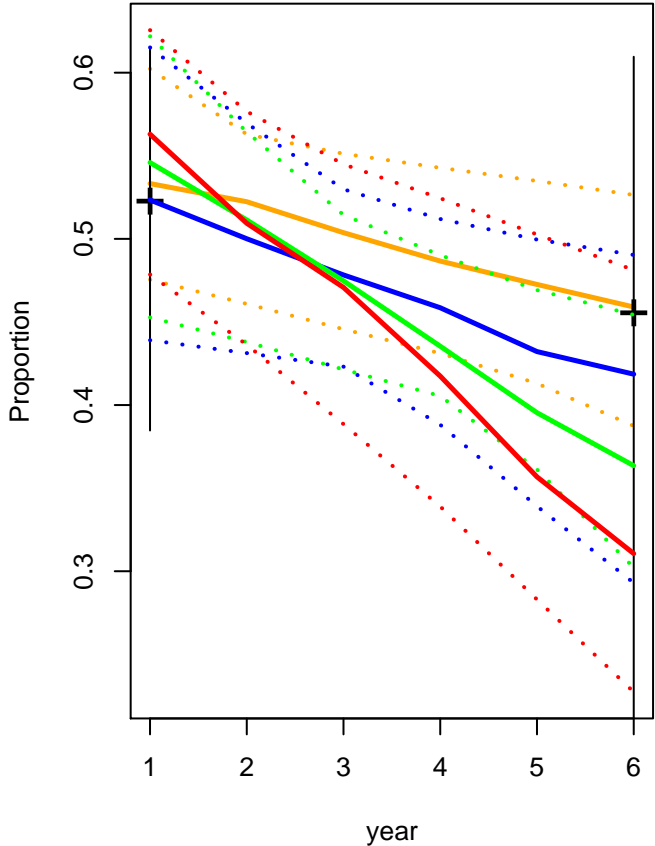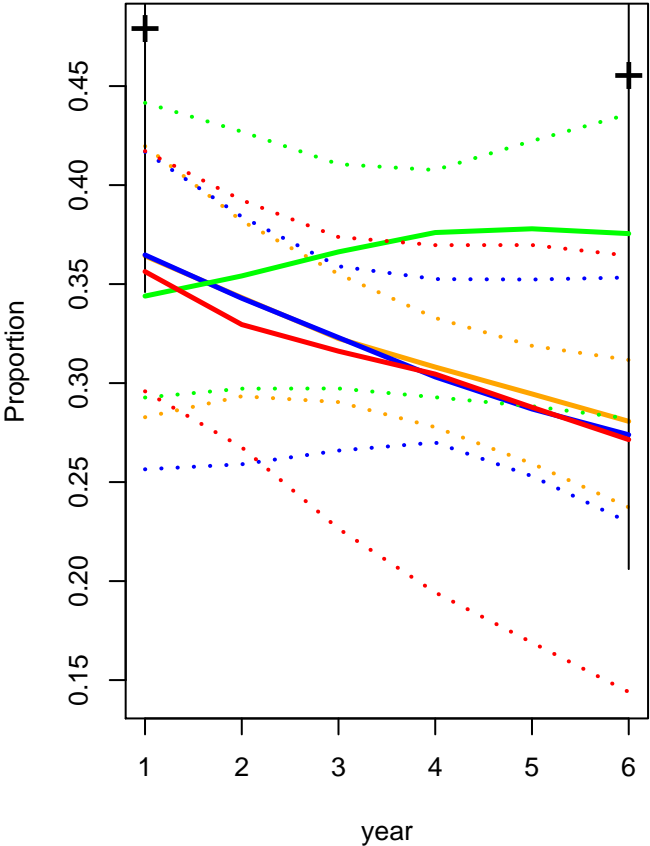

Moderate Infection

Dead

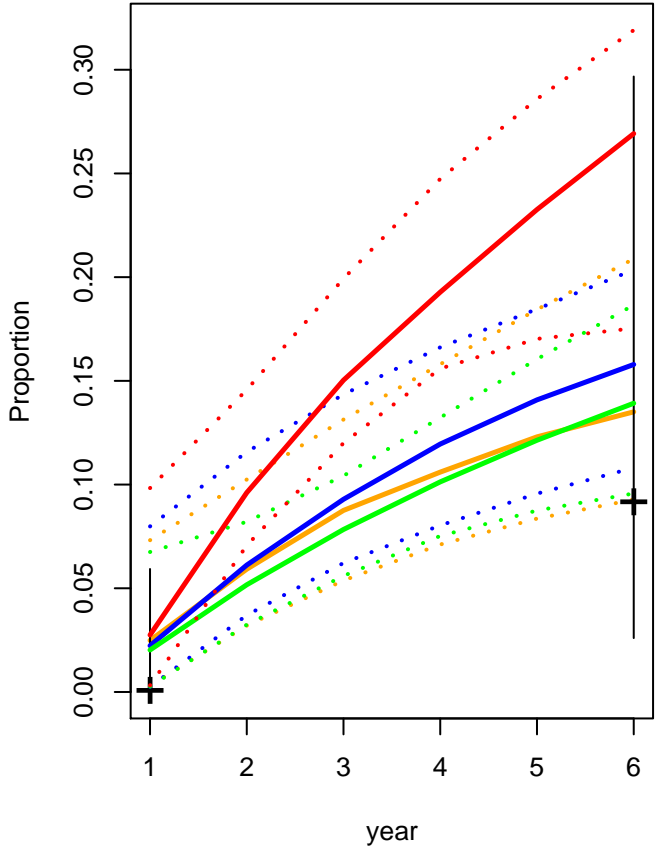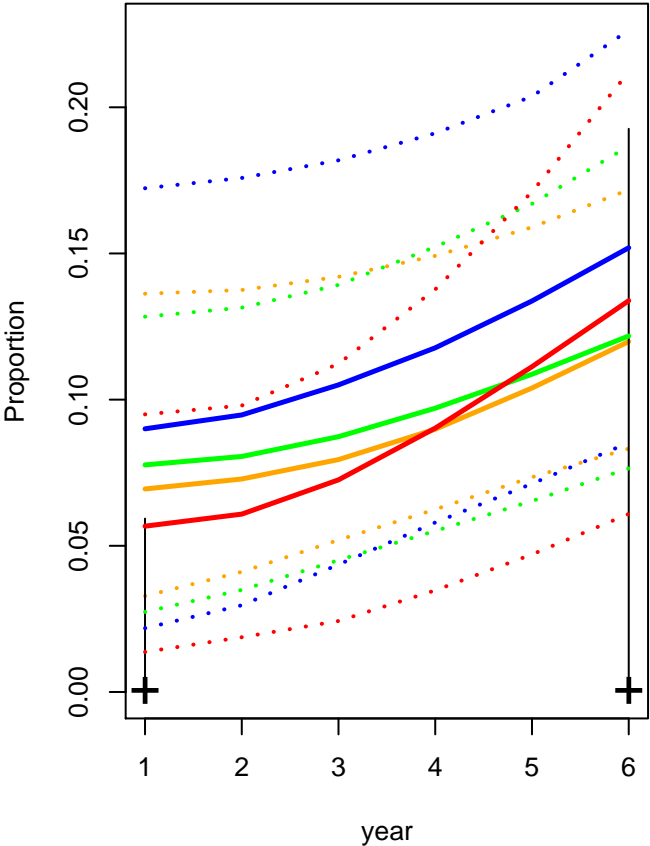

Uninfected

Site 110

Slight Infection

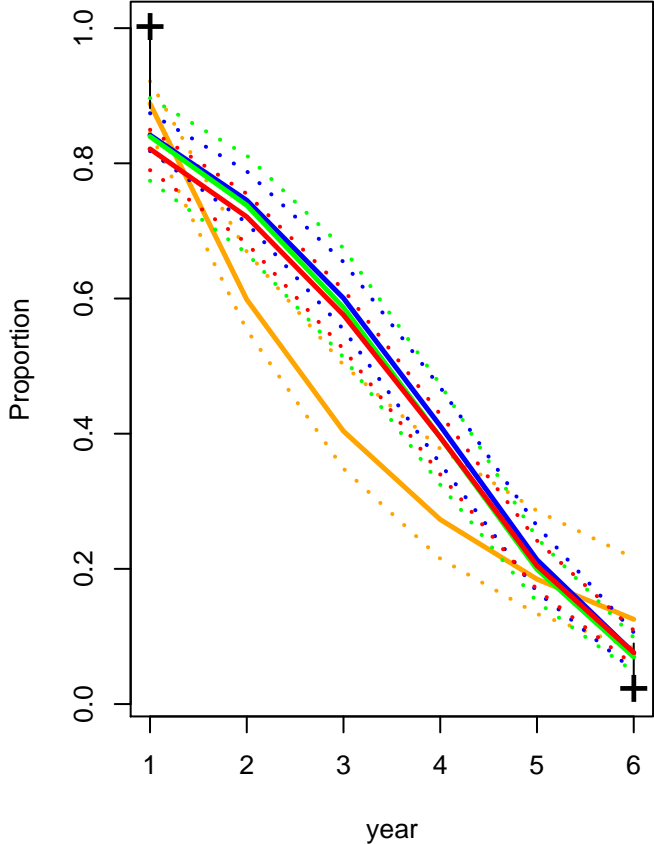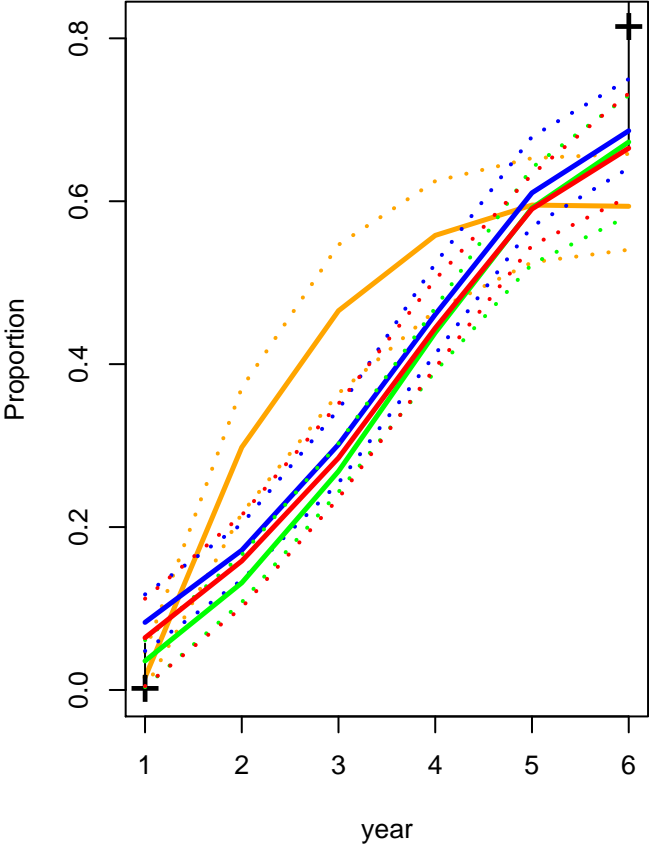

Moderate Infection

Dead

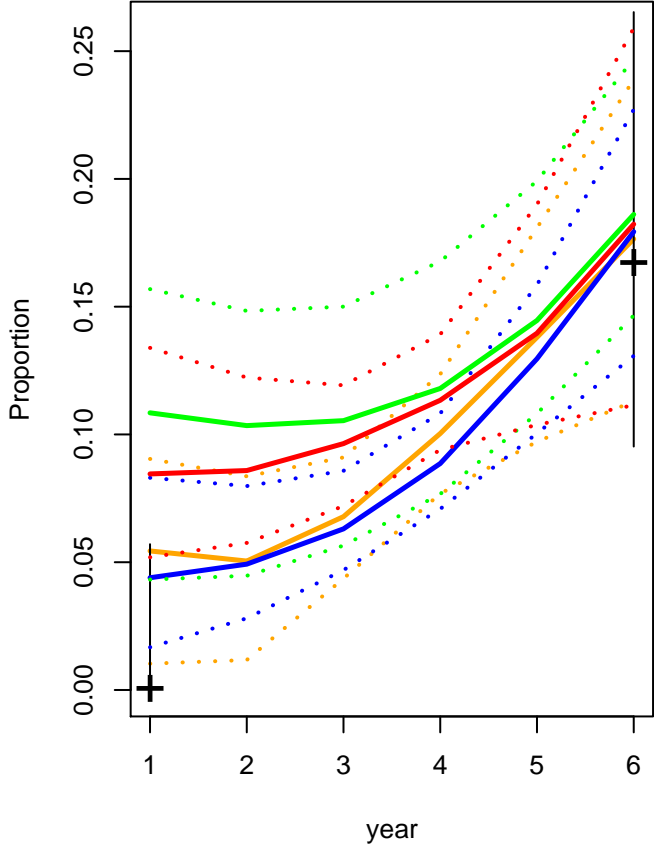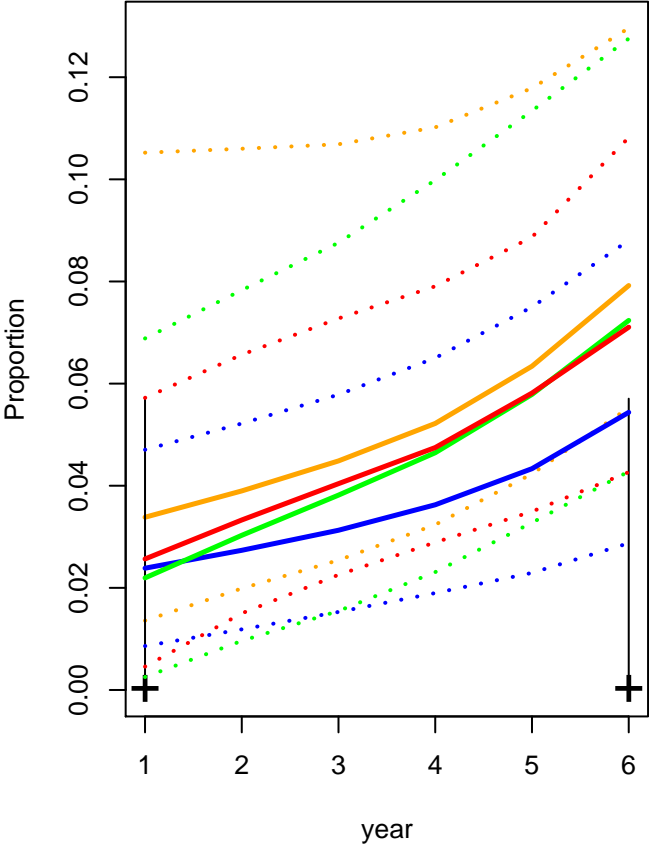



**Uninfected**

Site 111

**Slight Infection**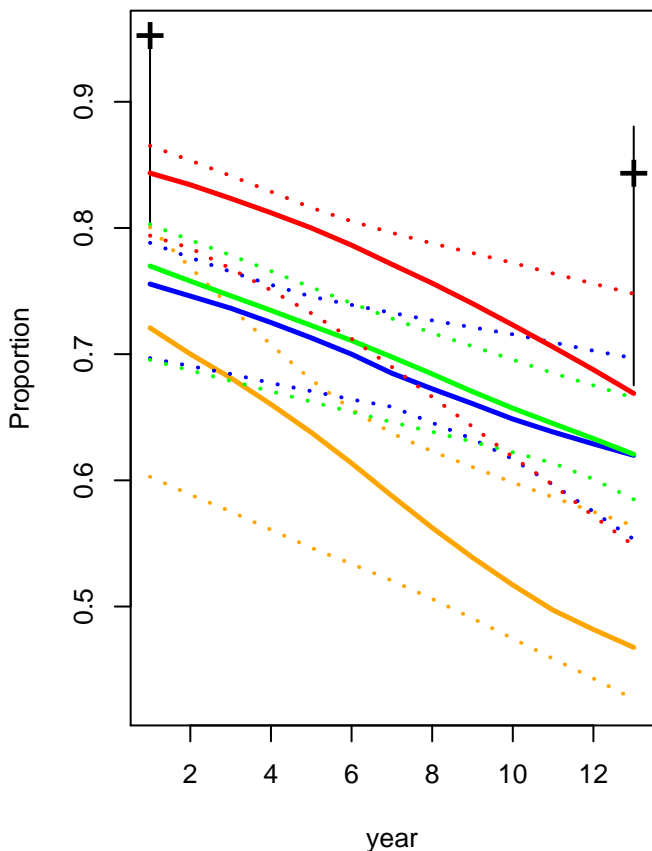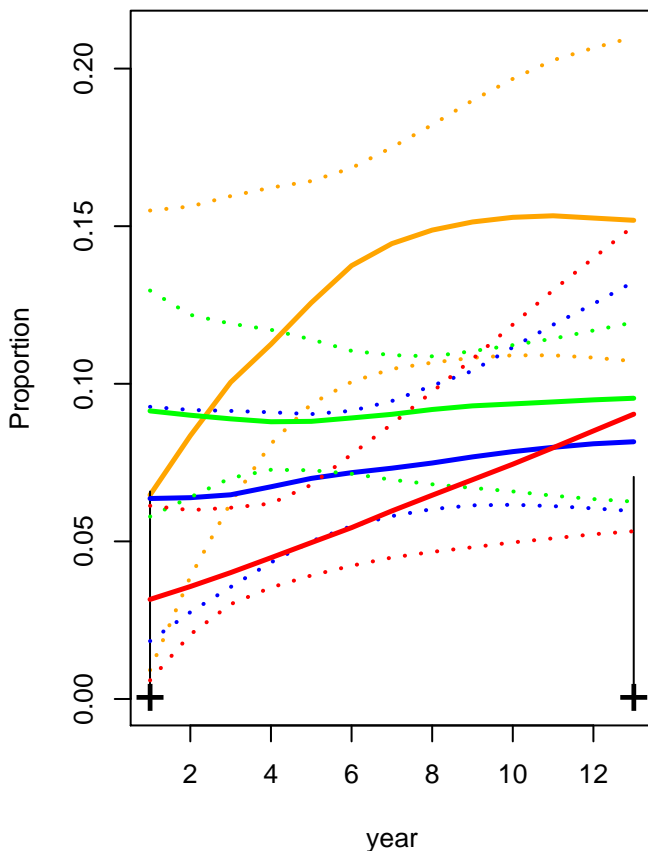**Moderate Infection****Dead**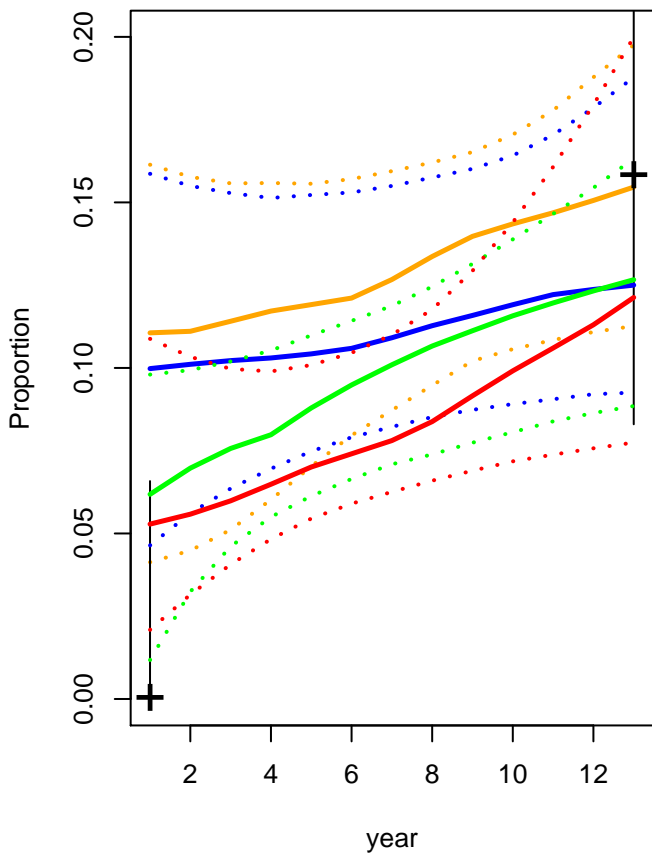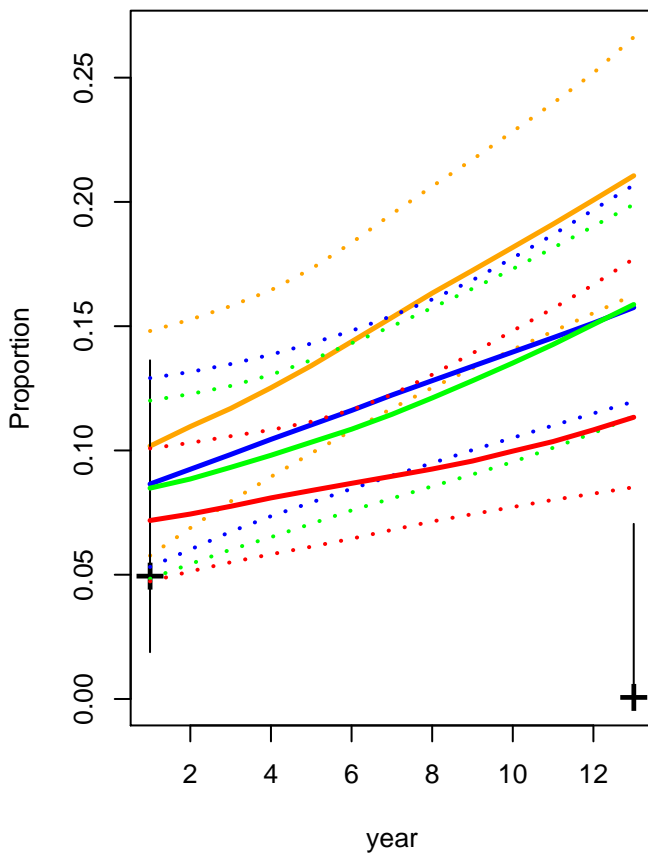

Uninfected

Site 112

Slight Infection

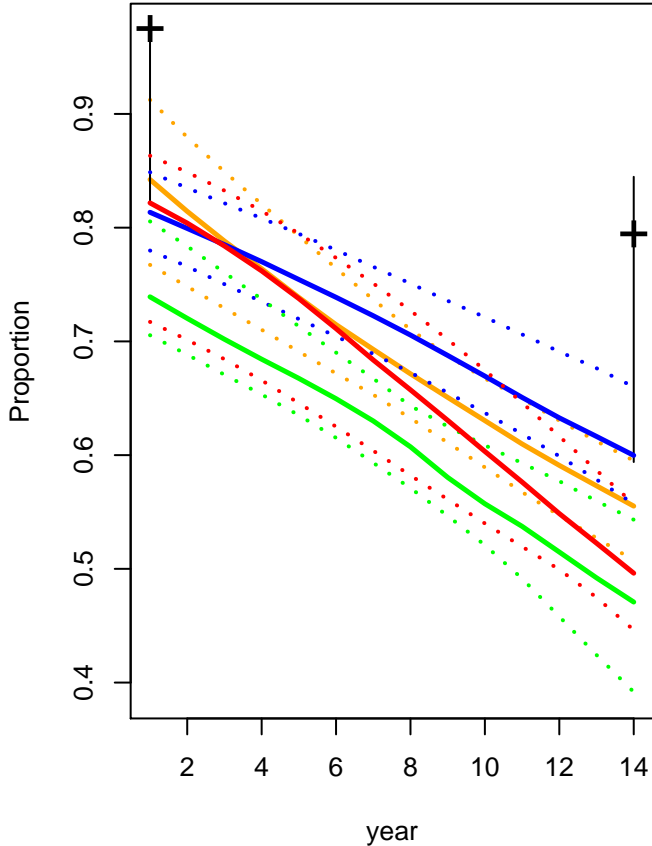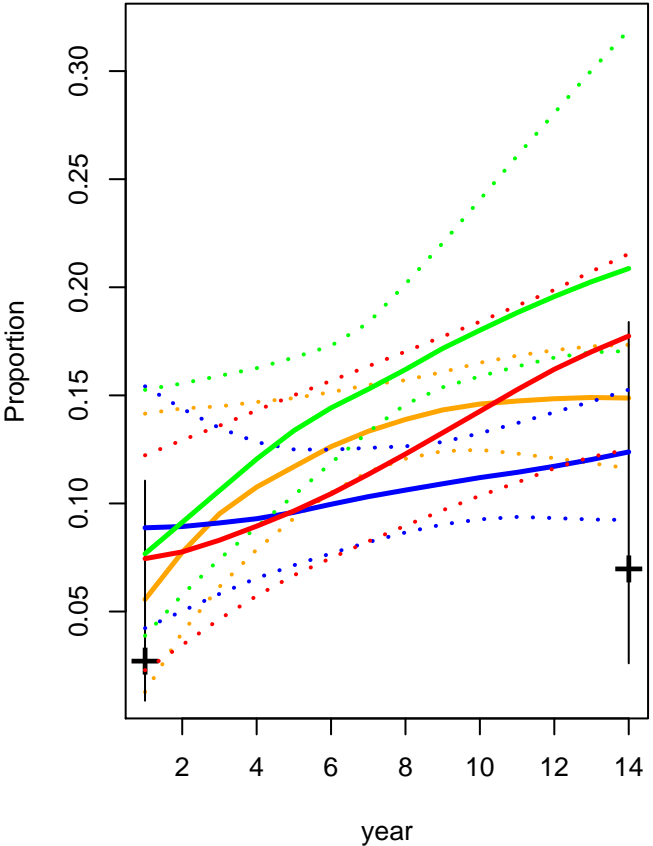

Moderate Infection

Dead

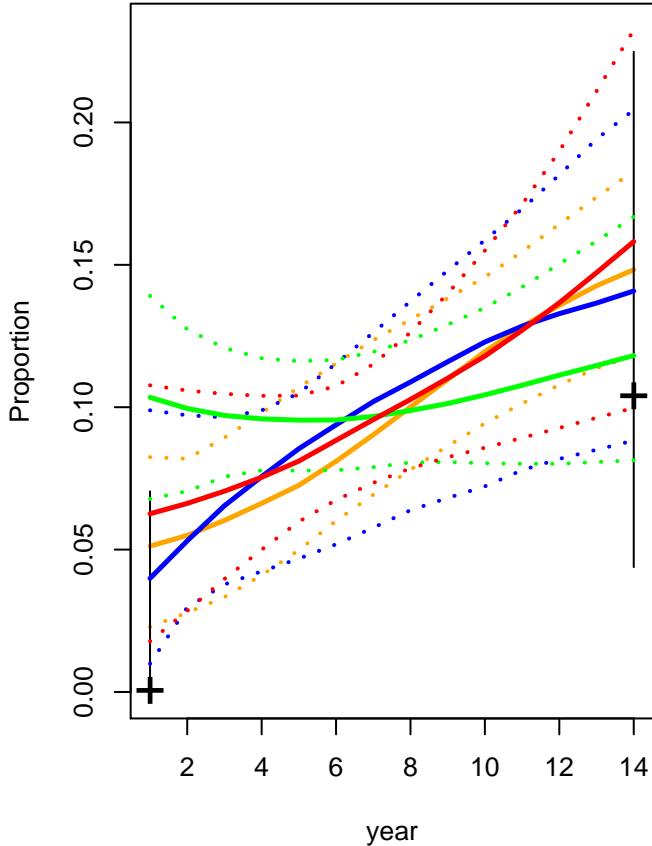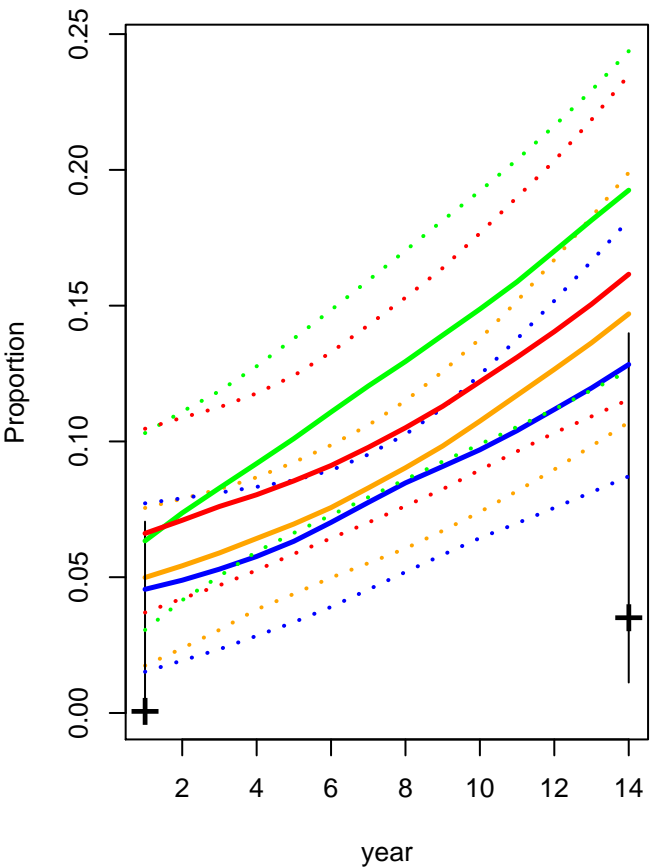

Uninfected

Site 113

Slight Infection

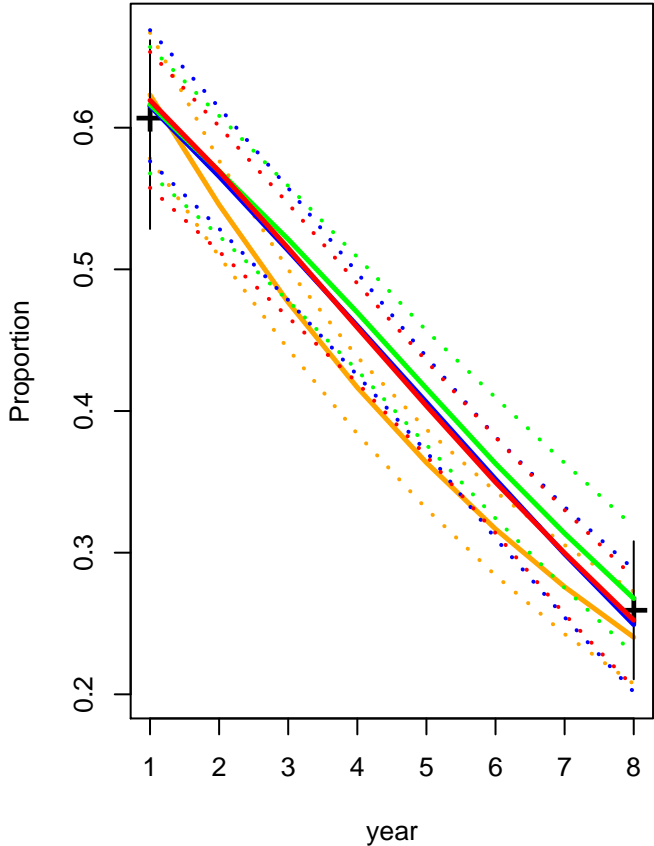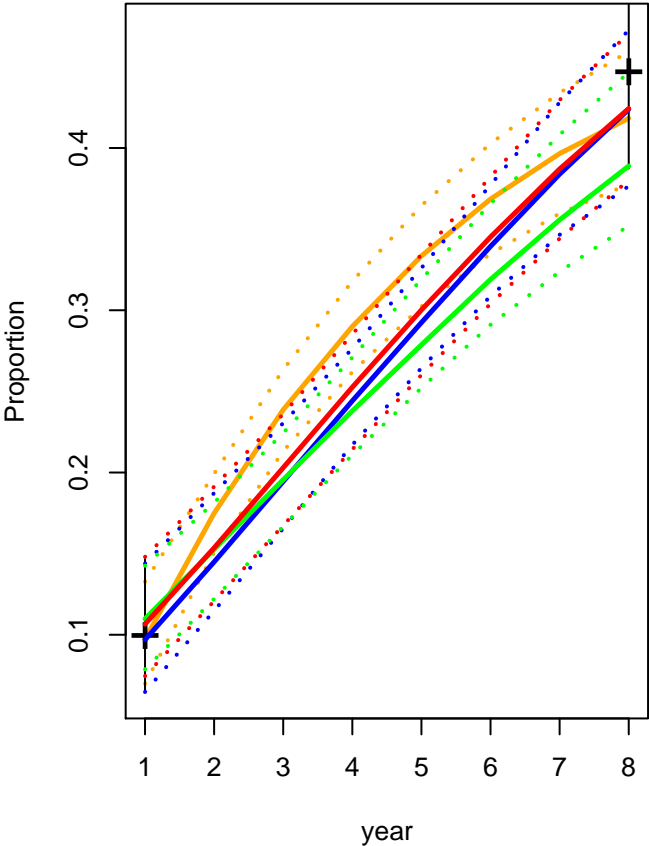

Moderate Infection

Dead

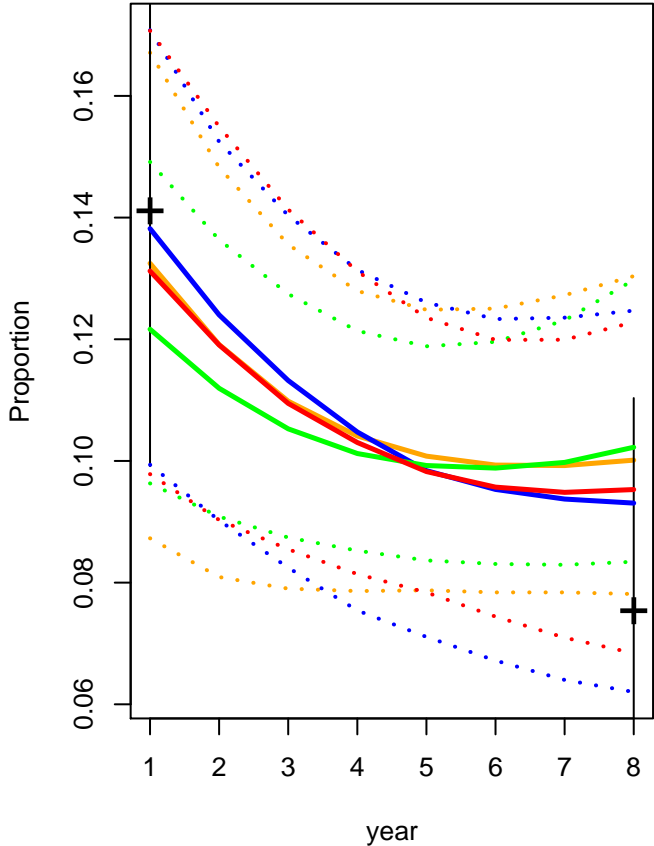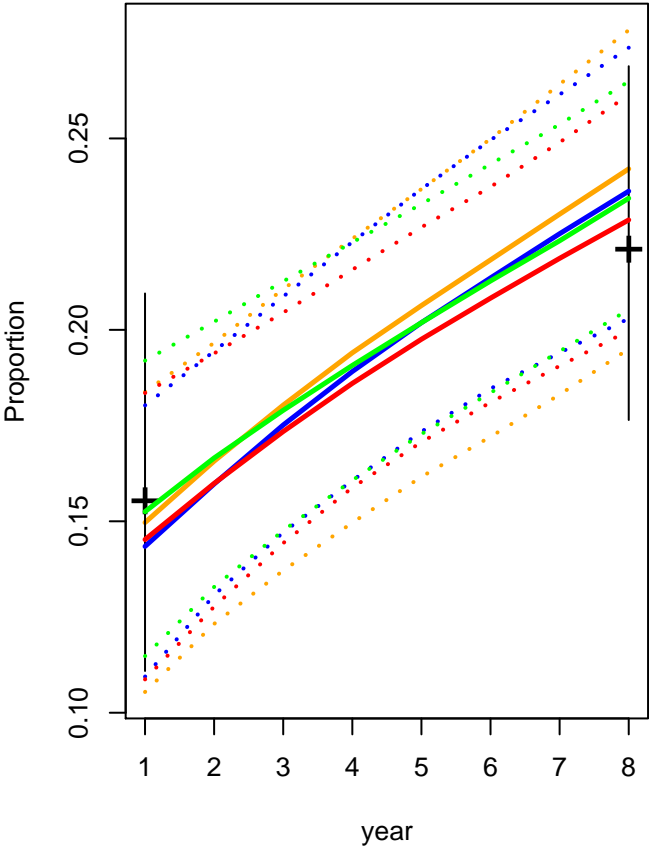

Uninfected

Site 114

Slight Infection

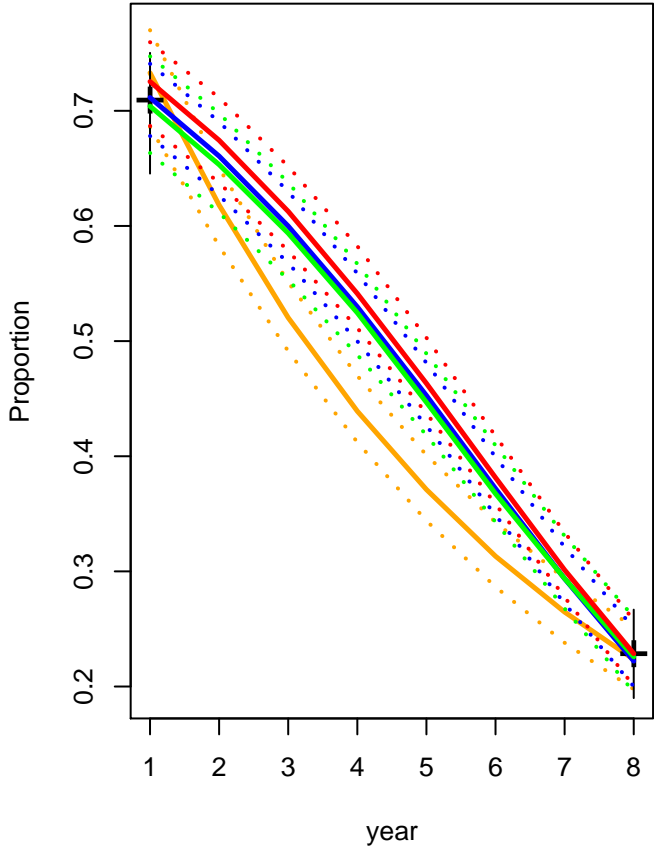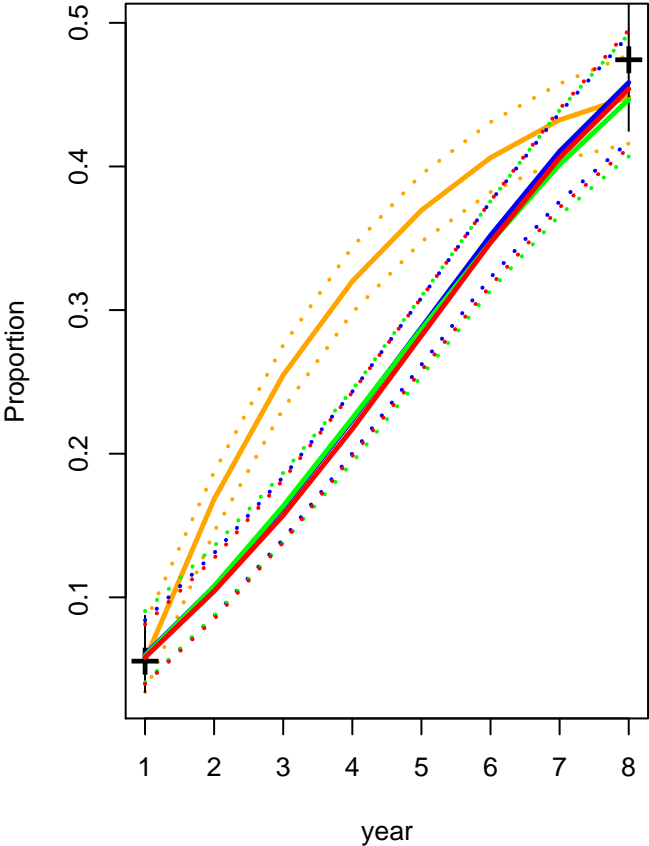

Moderate Infection

Dead

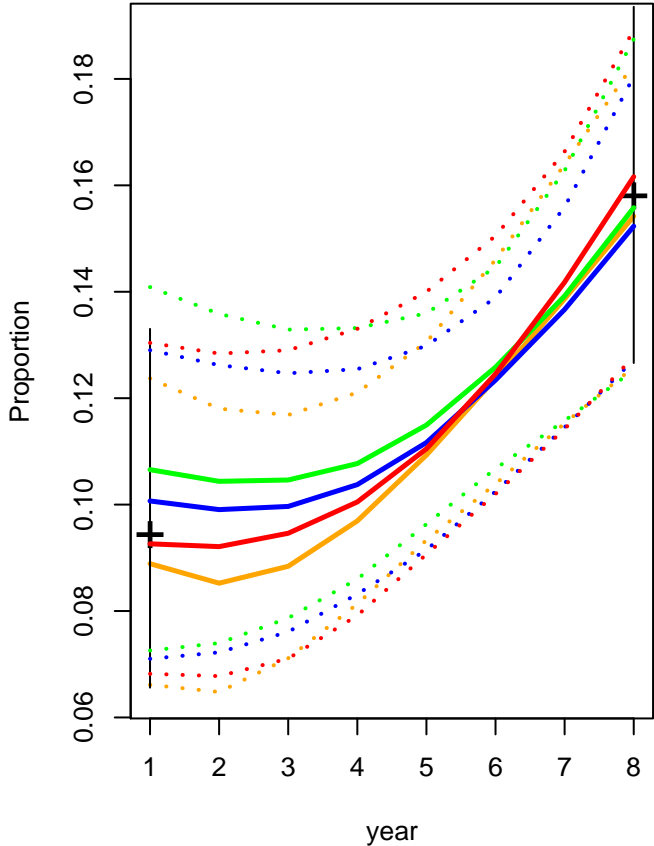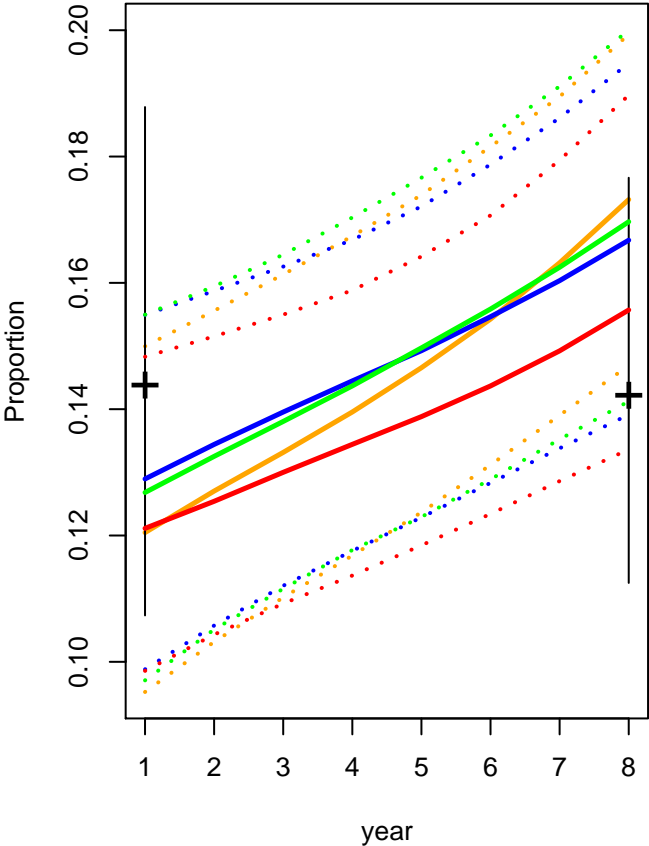

Uninfected

Site 115

Slight Infection

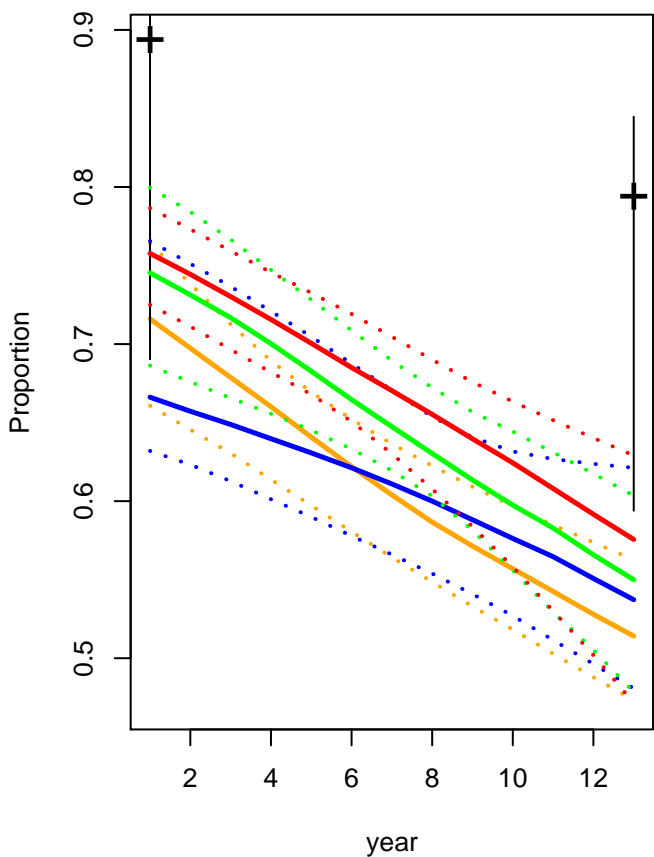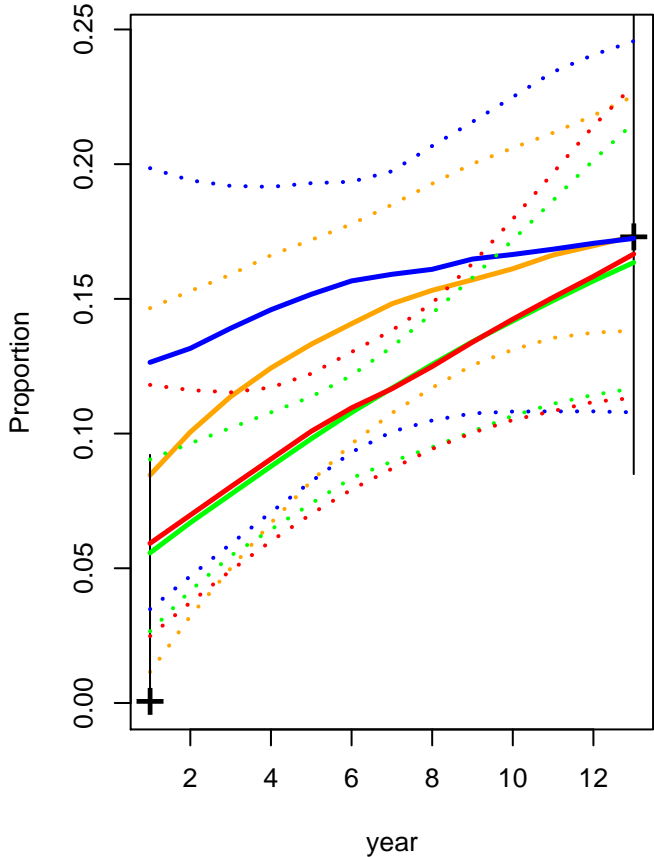

Moderate Infection

Dead

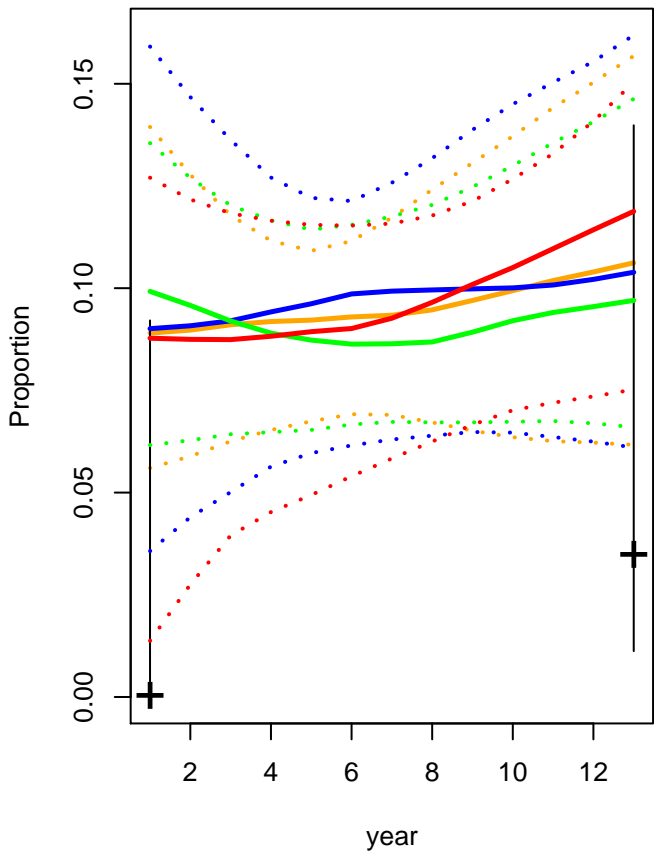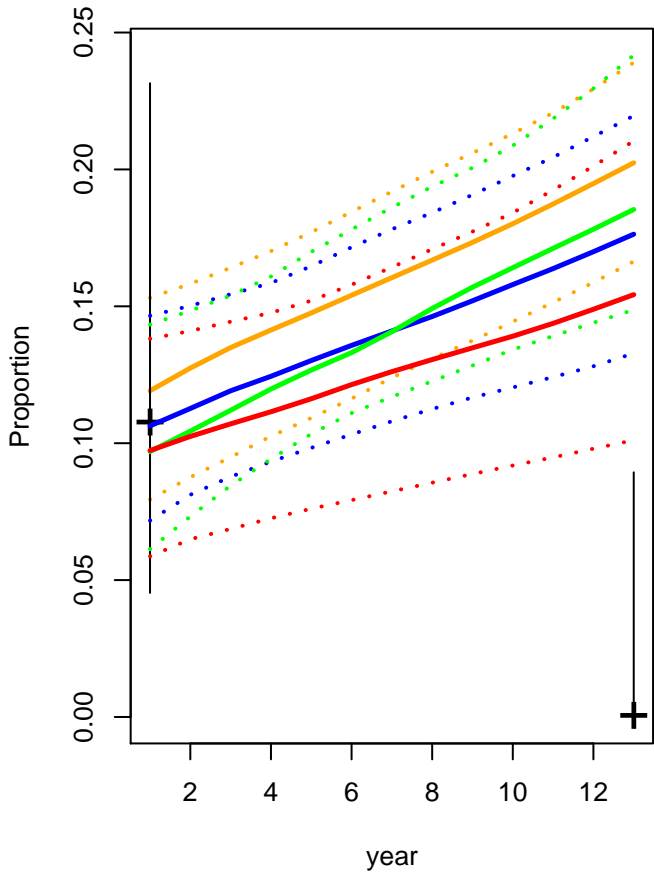

Uninfected

Site 116

Slight Infection

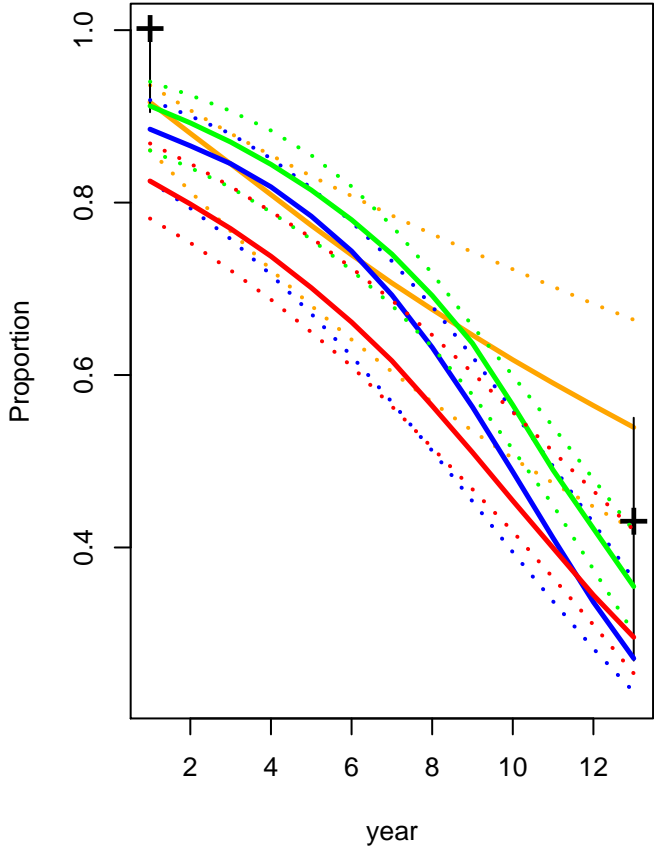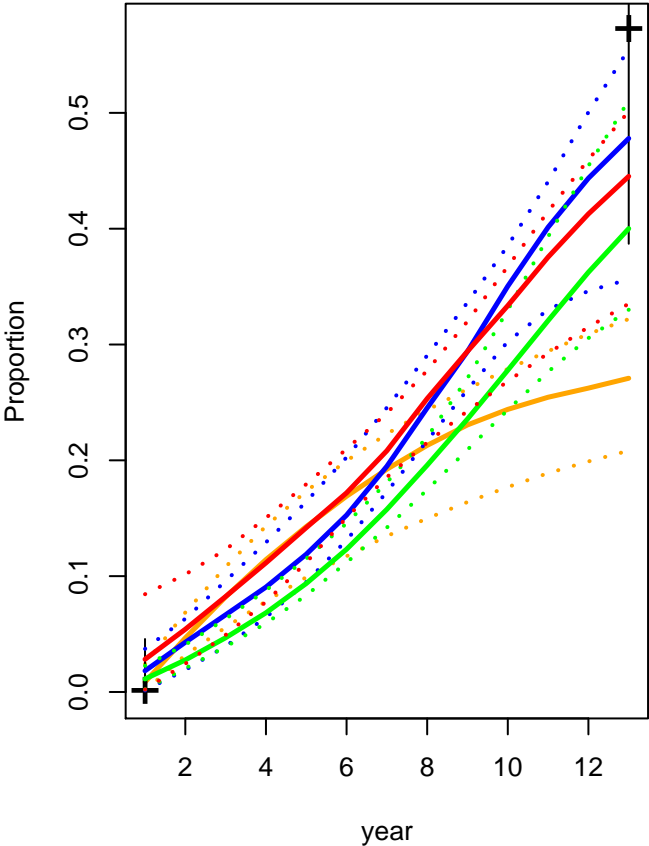

Moderate Infection

Dead

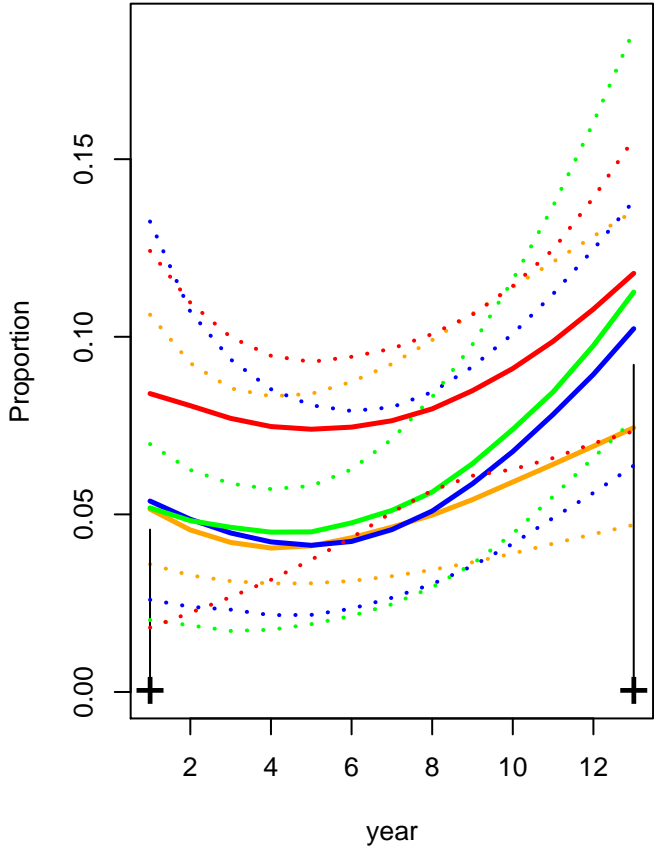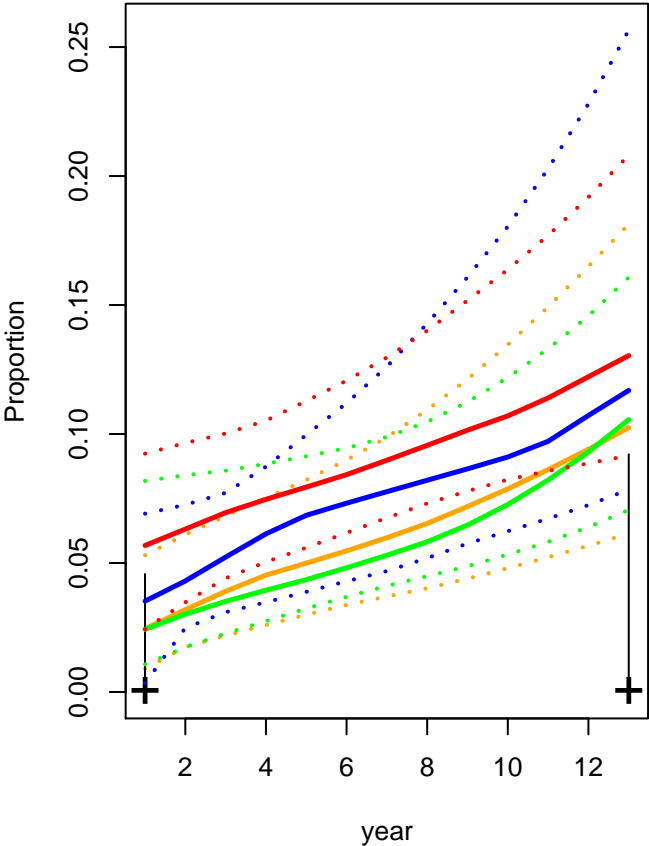

Uninfected

Site 117

Slight Infection

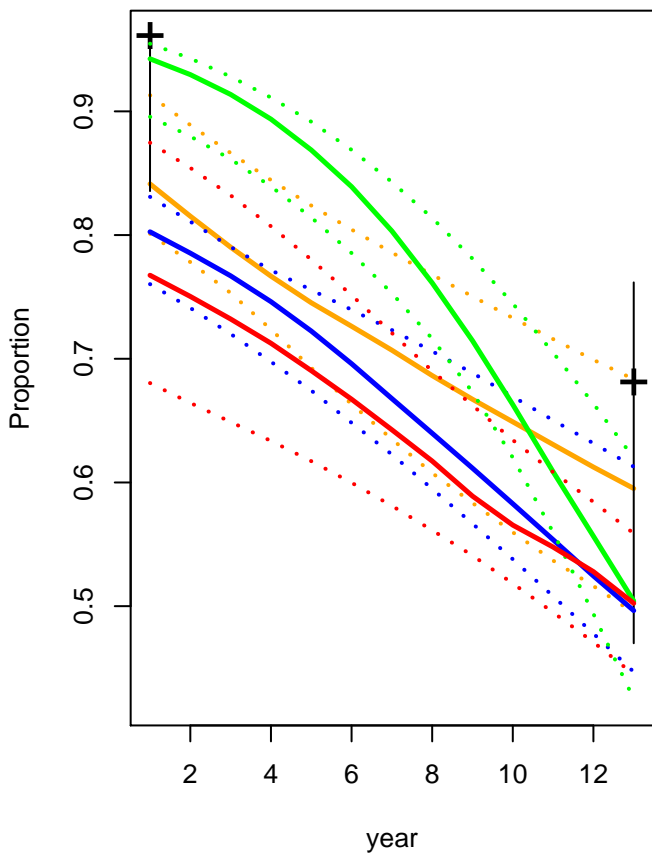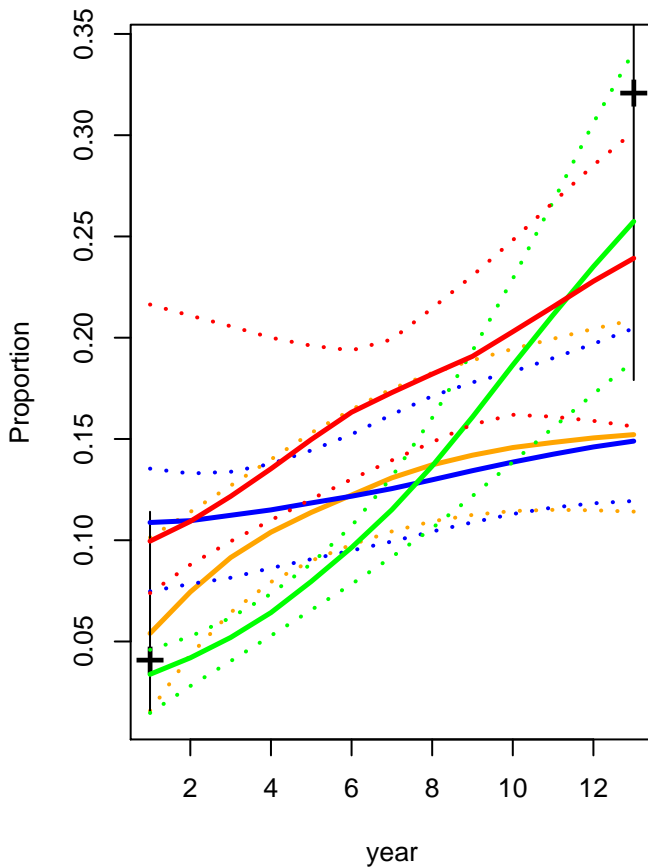

Moderate Infection

Dead

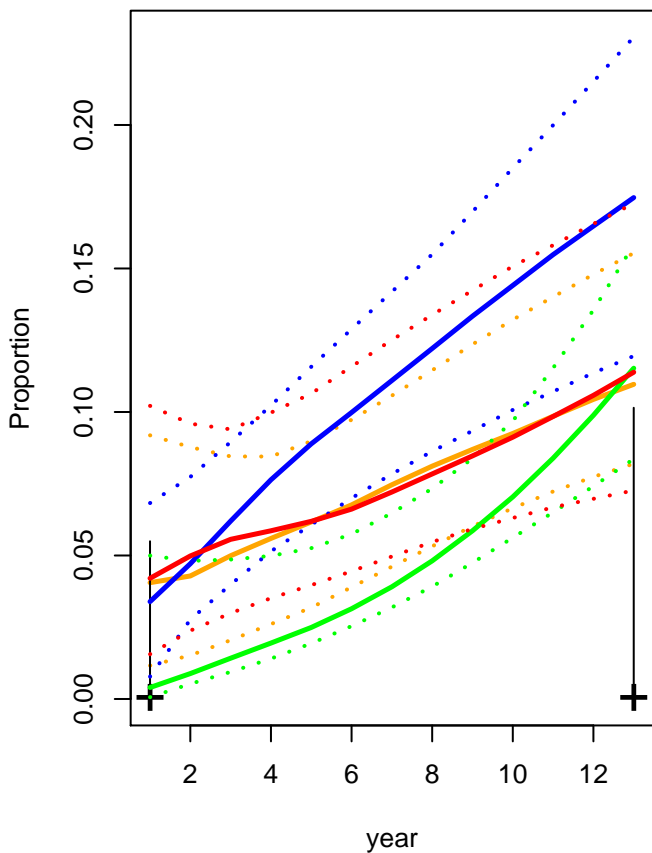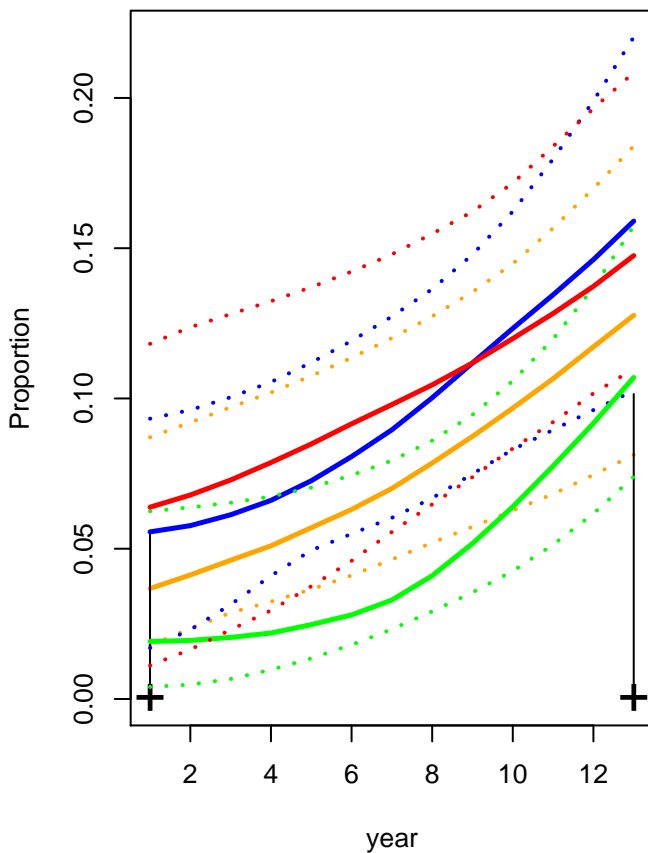

Uninfected

Site 118

Slight Infection

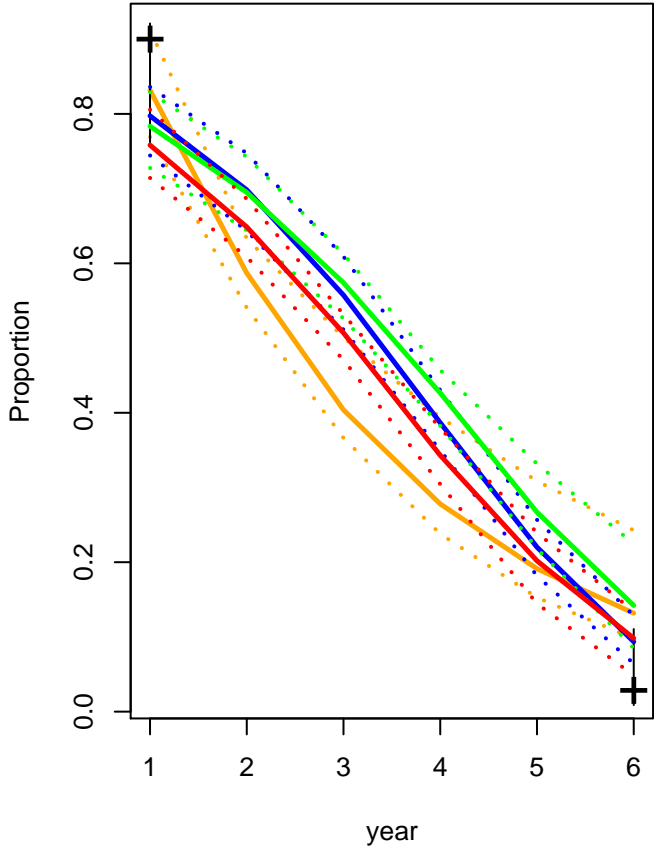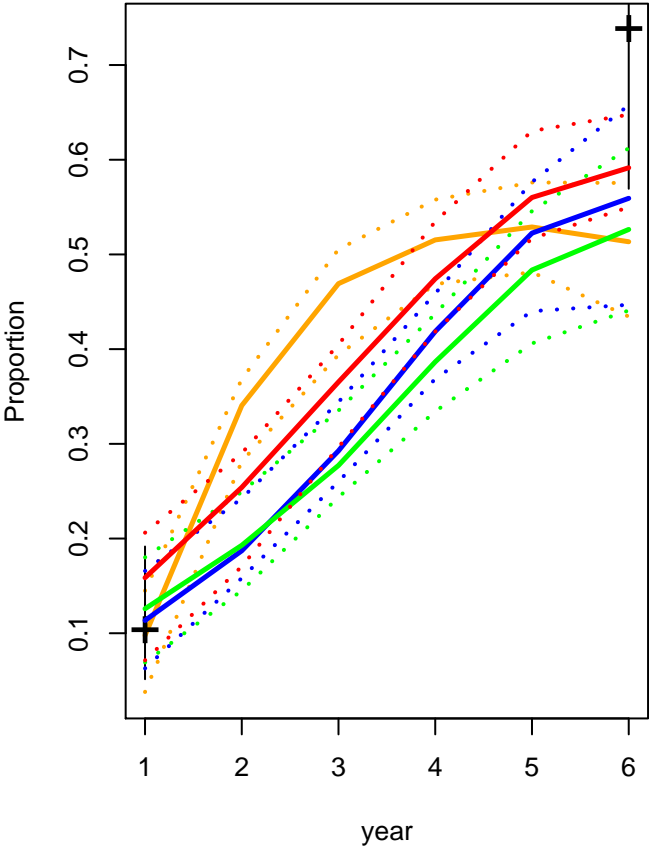

Moderate Infection

Dead

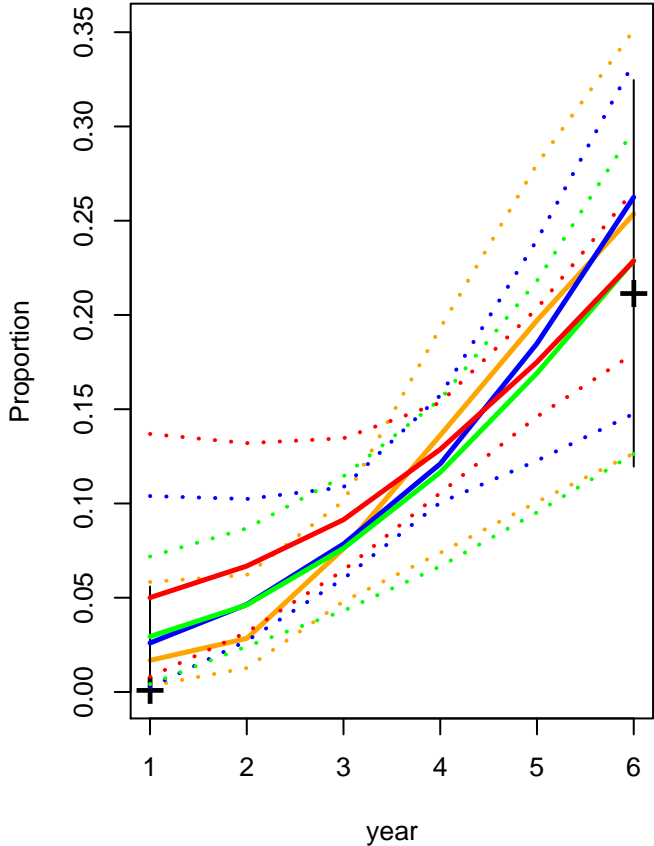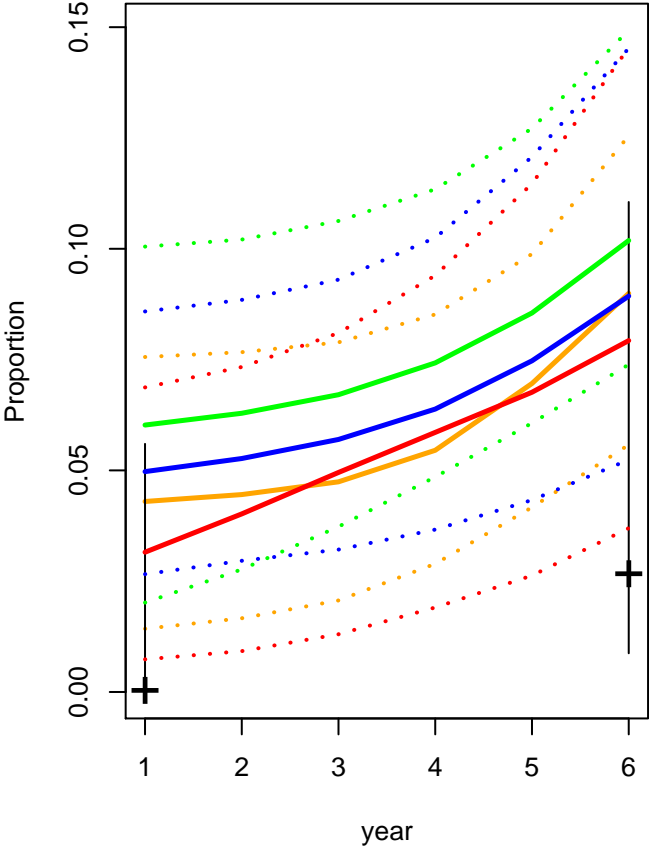



Uninfected

Site 119

Slight Infection

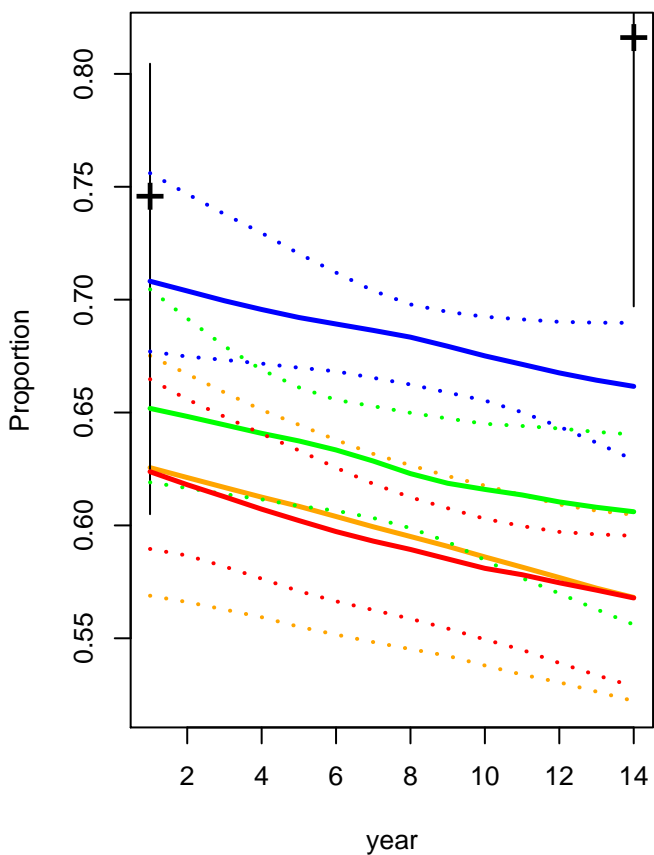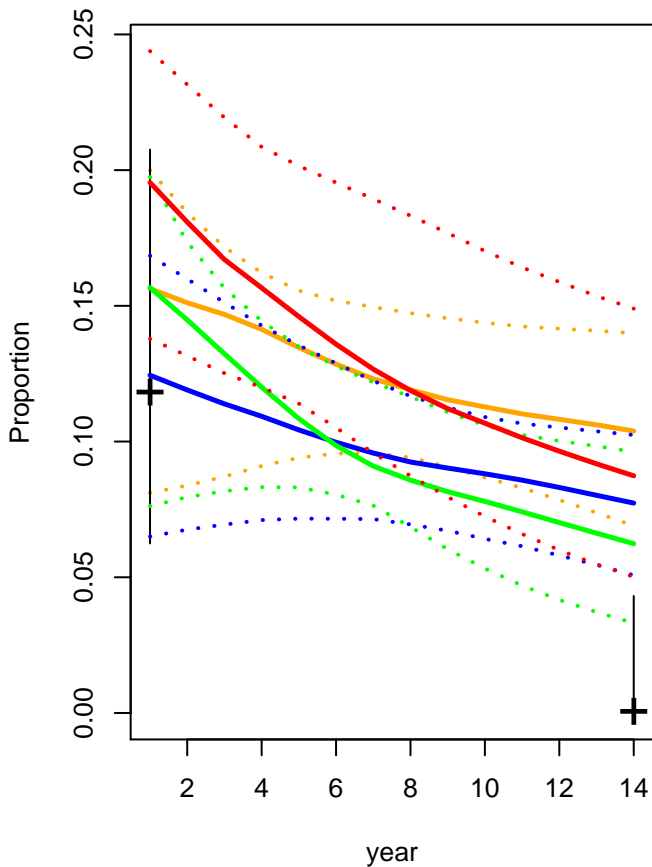

Moderate Infection

Dead

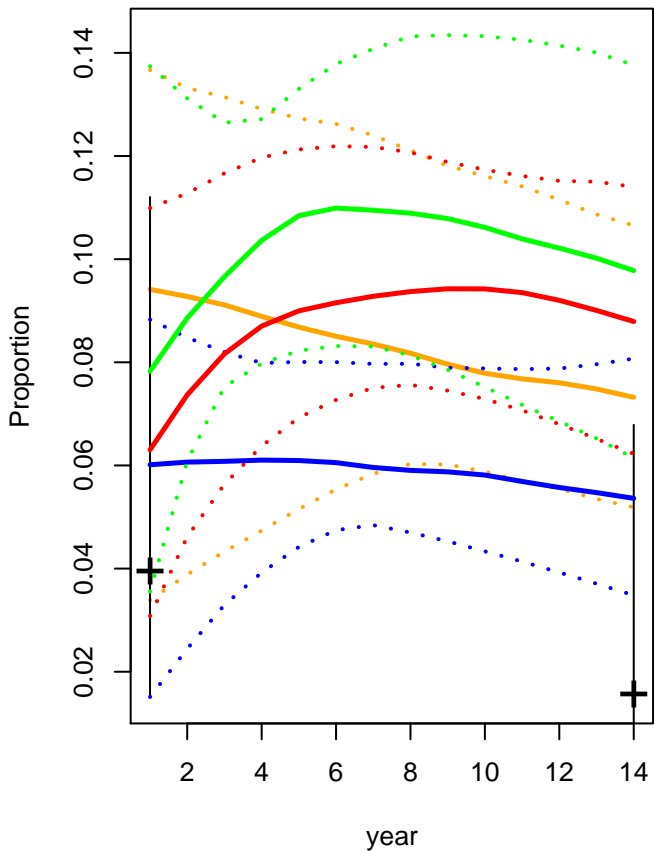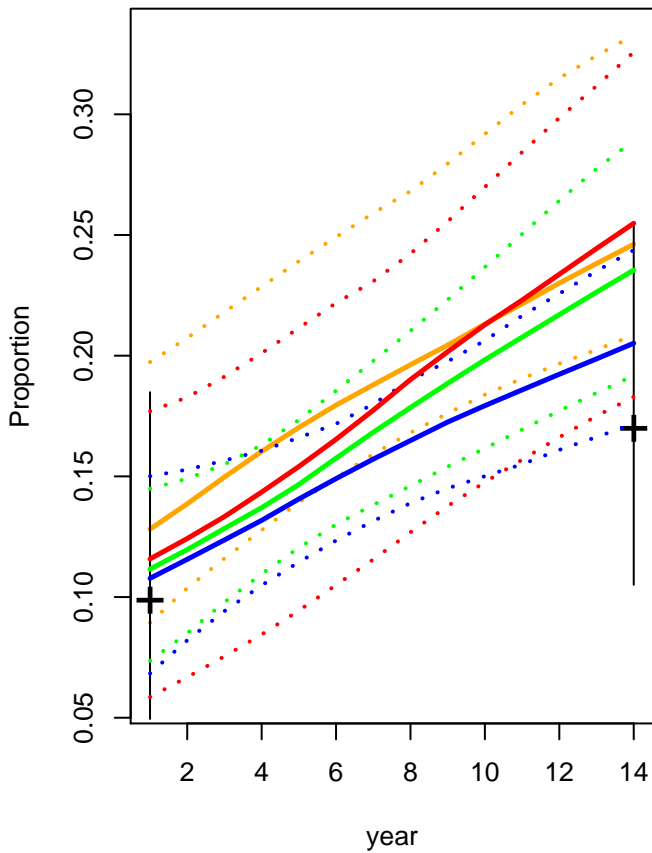

Uninfected

Site 120

Slight Infection

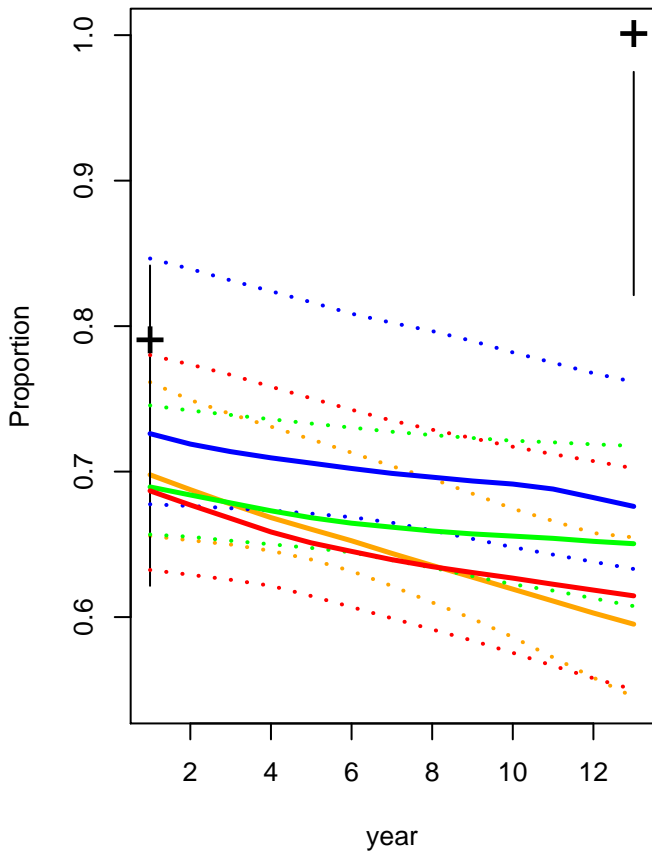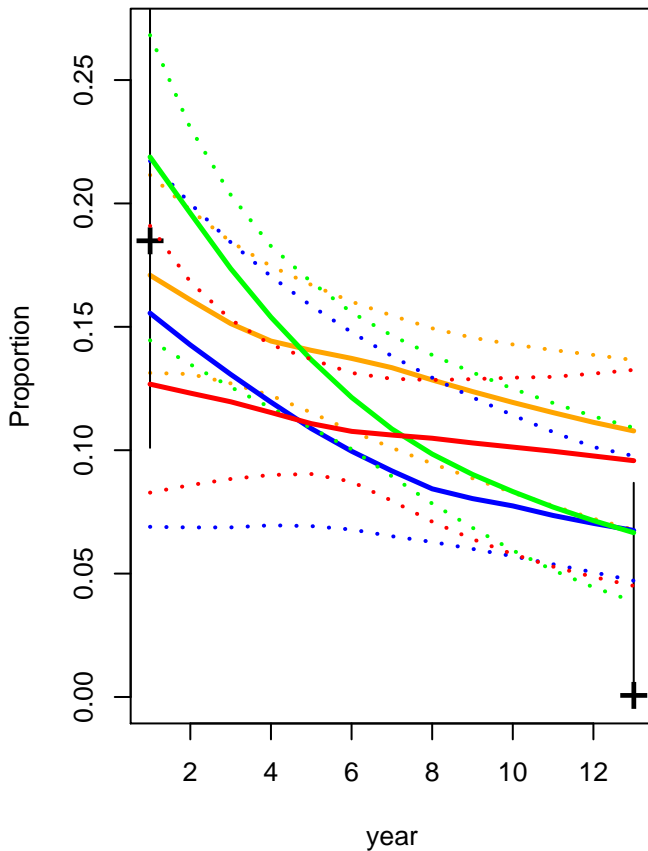

Moderate Infection

Dead

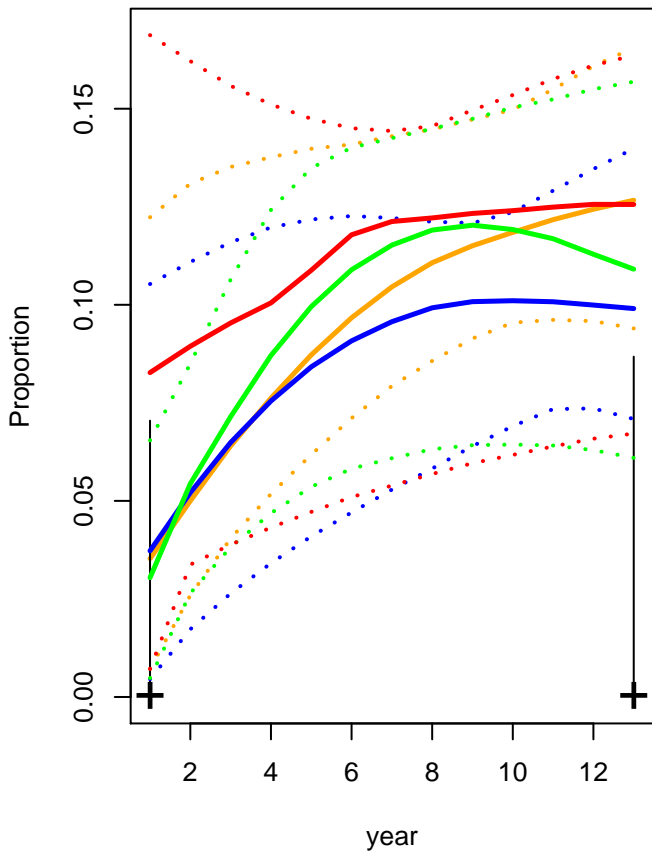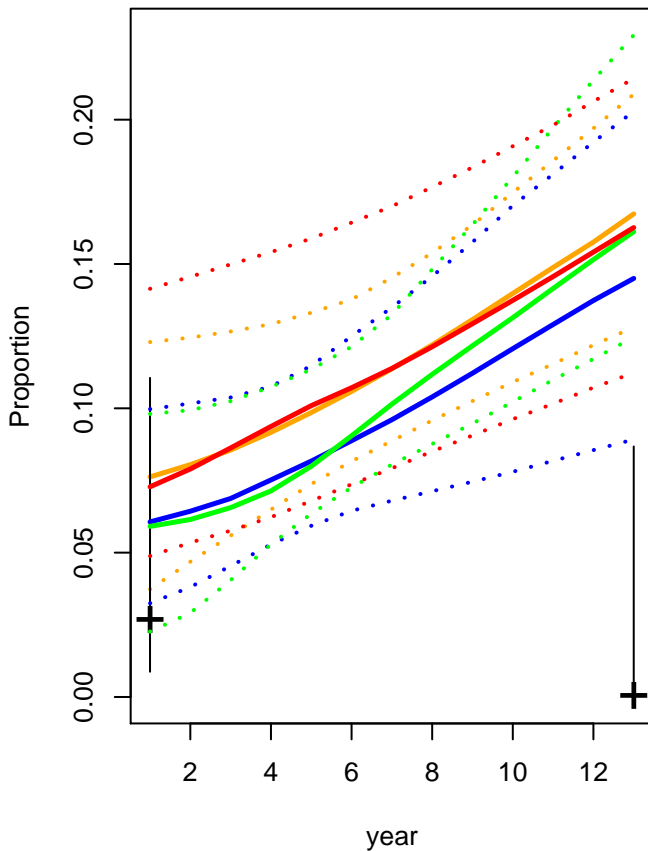

Uninfected

Site 121

Slight Infection

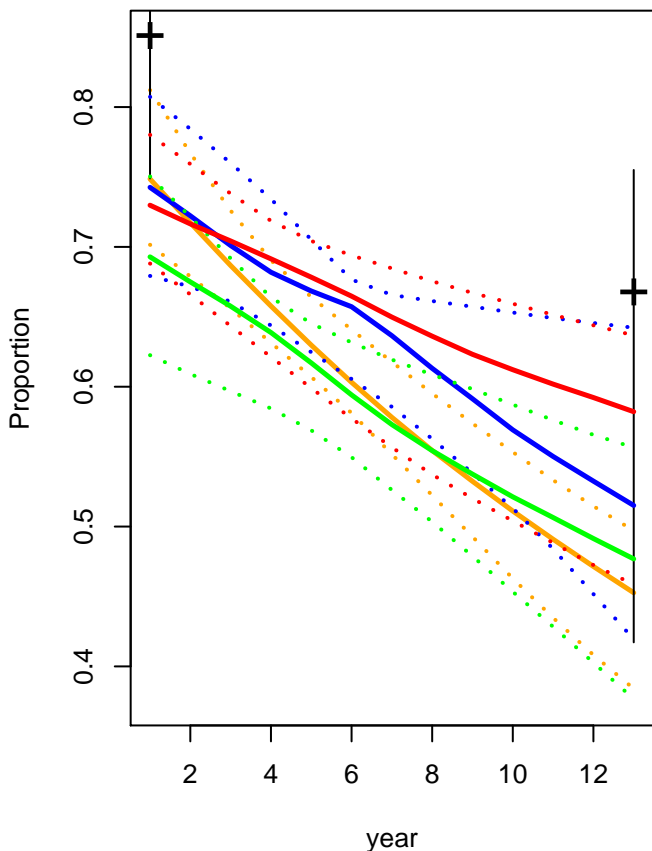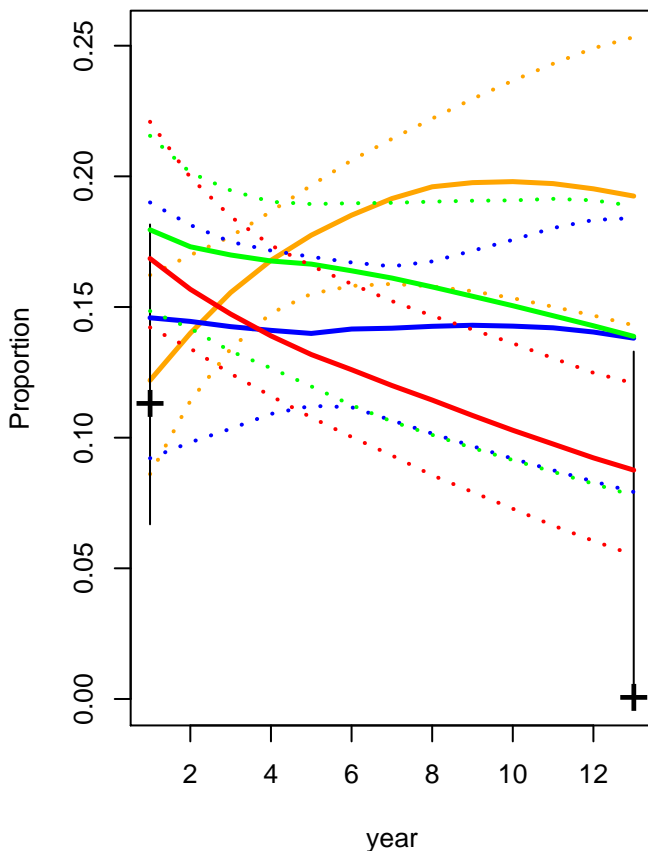

Moderate Infection

Dead

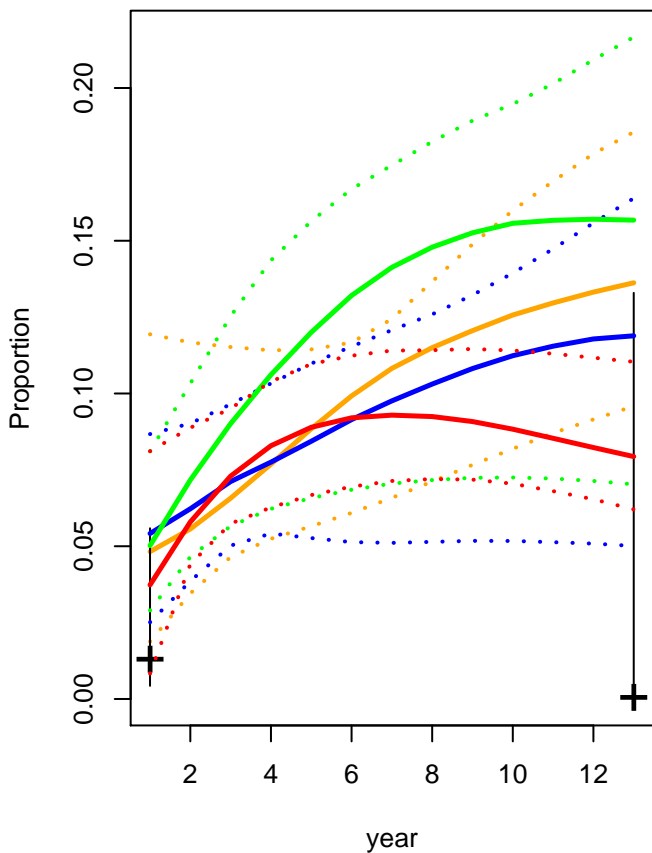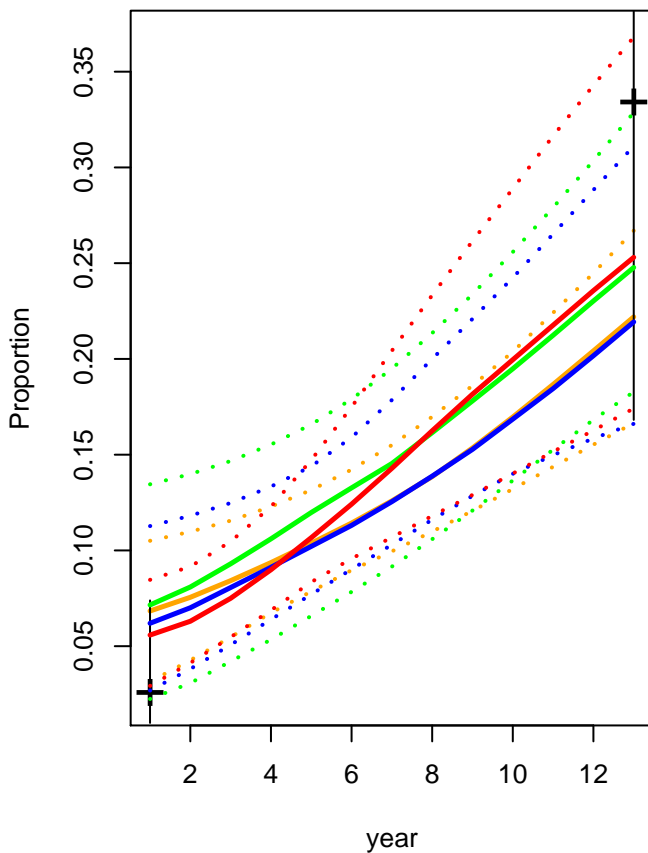

Supplement: Supplementary file 1 [file 1]
